# Supplementary material
Source: PubMed Central journal article supplement (PMC3226323)

# Direct functionalization of (un)protected tetrahydroisoquinolines and isochroman under iron and copper catalysis – two metals, two mechanisms

Michael Ghobrial, Marko D. Mihovilovic and Michael Schnürch\*

Institute of Applied Synthetic Chemistry, Vienna University of Technology, Getreidemarkt 9/163-OC, 1060 Vienna, Austria

\*E-mail: mschnuerch@ioc.tuwien.ac.at

## Table of contents

|                                                                                                                         |   |
|-------------------------------------------------------------------------------------------------------------------------|---|
| 1. General .....                                                                                                        | 2 |
| 1.1. Caution.....                                                                                                       | 2 |
| 1.2. Instrumentation.....                                                                                               | 2 |
| 2. Copies of <sup>1</sup> H and <sup>13</sup> C-NMR spectra of compounds 3a-3s, 5h-5t, 8a-8d, 10a-10f, and 11a-11d..... | 3 |

## **1. General**

Unless otherwise noted, chemicals were purchased from commercial suppliers and used without further purification. Flash column chromatography was performed on silica gel (40-63 $\mu$ m). For thin layer chromatography (TLC) aluminum coated silica gel was used and signals were visualized with UV light (254nm).

### **1.1. Caution**

Mixing a metal salt and peroxide can cause explosion. See: Jones, A. K.; Wilson, T. E.; Nikam, S. S. In Encyclopedia of Reagents for Organic Synthesis, Paquette, L. A. Ed.; John Wiley & Sons, Inc. 1995, 2, 880.

### **1.2. Instrumentation**

GC-MS runs were performed using a standard capillary column (30m x 0.32 mm ID), applying the following standardized temperature profile: 2 minutes at 80°C, 10°C/min until 280°C, 15 minutes at 280°C. All samples subjected to HR-MS were analyzed by LC-IT-TOF-MS in only positive ion detection mode upon recording of MS and MS/MS spectra. For the evaluation in the following, only positive ionization spectra were used (where the quasi-molecular ion is the one of [M+H]<sup>+</sup>), and further data or information were not taken into consideration. Microwave reactions were performed on a BIOTAGE Initiator<sup>TM</sup> sixty microwave unit. Melting points were determined using a Kofler-type hot stage microscope and are uncorrected. <sup>1</sup>H-NMR and <sup>13</sup>C-NMR spectra were recorded either on 200 MHz or 400 MHz spectrometer. Chemical shifts are reported as ppm downfield from TMS (tetramethylsilane) as internal standard with multiplicity, number of protons, allocation, and coupling constant(s) in Hertz.

## 2. Copies of $^1\text{H}$ and $^{13}\text{C}$ -NMR spectra of compounds 3a-3s, 5h-5t, 8a-8d, 10a-10f, and 11a-11d

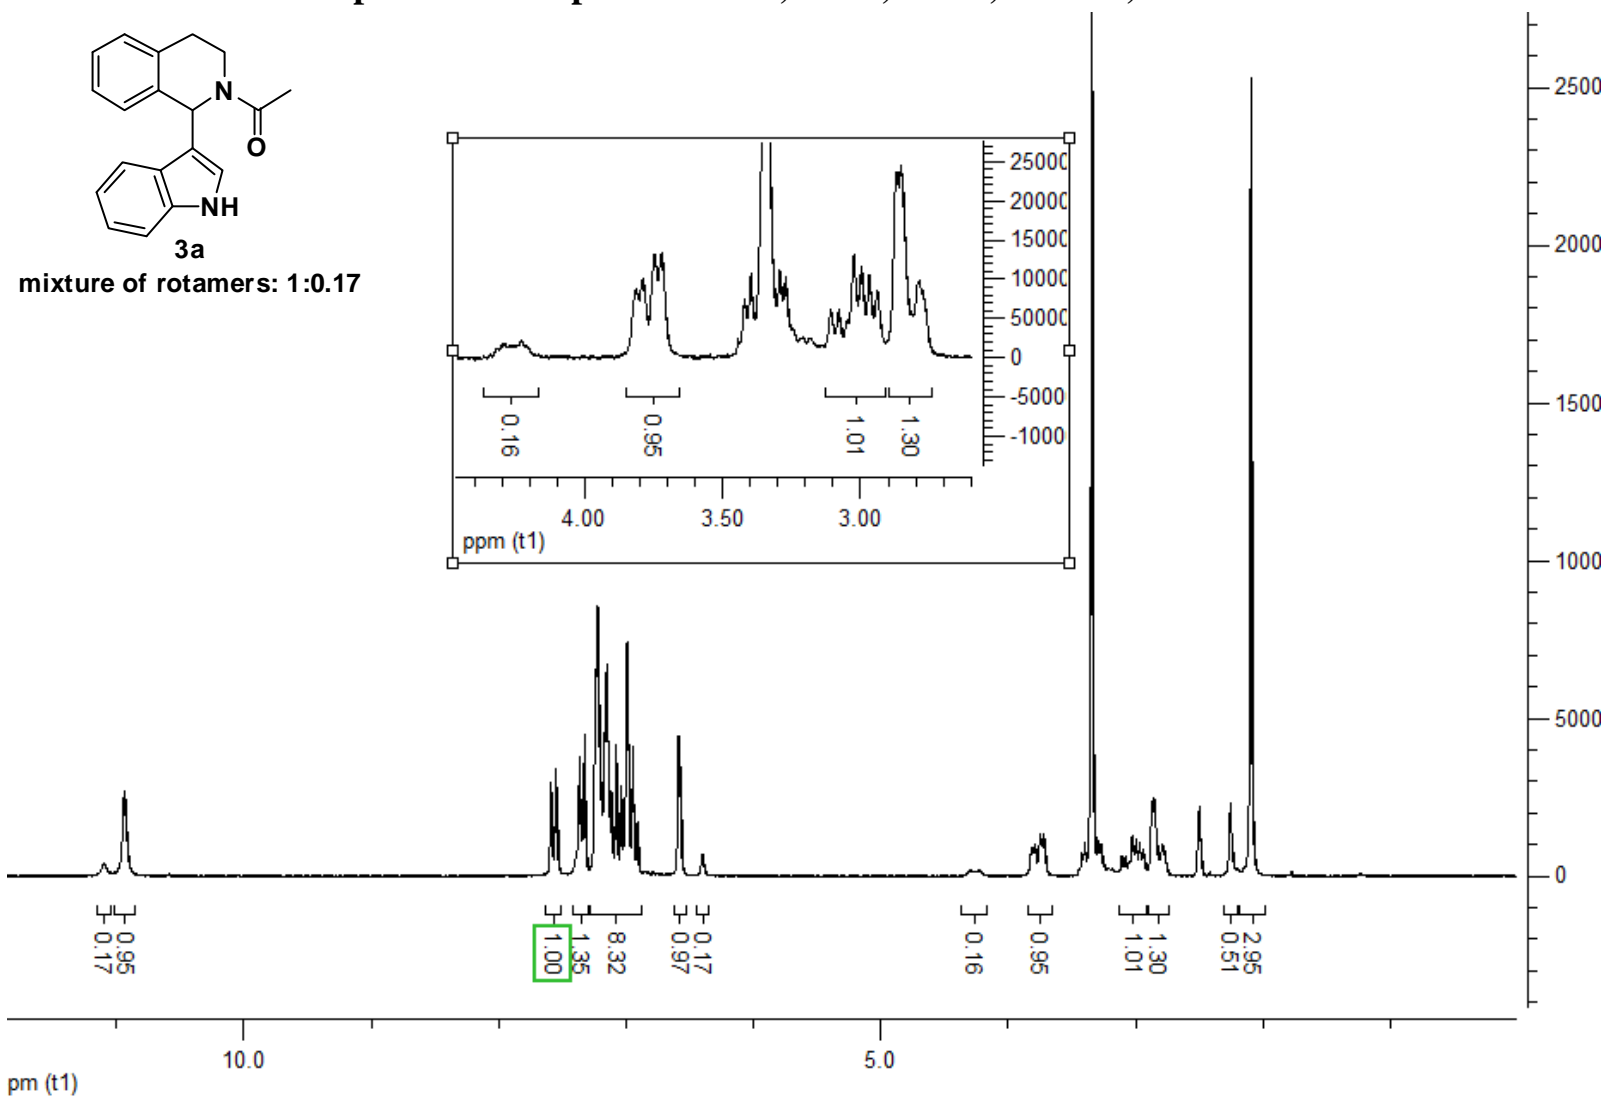

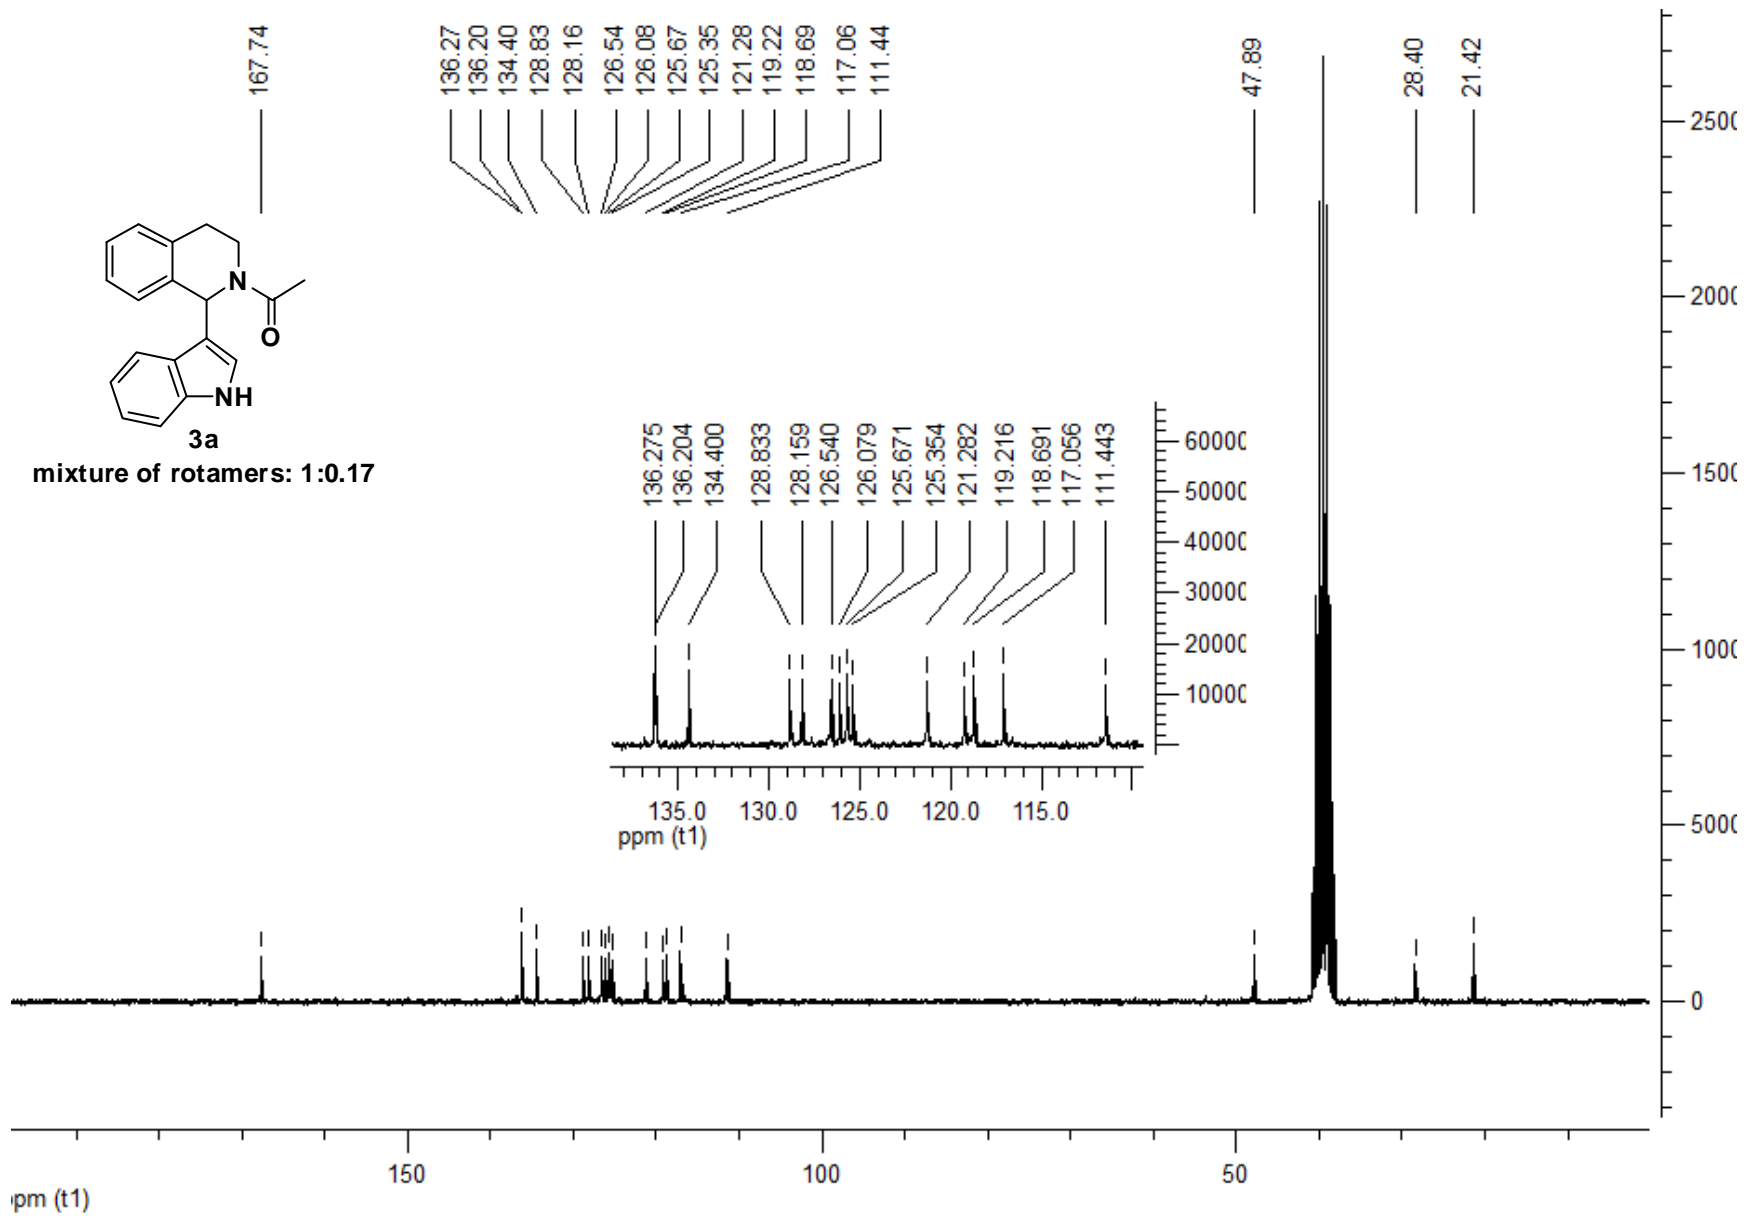

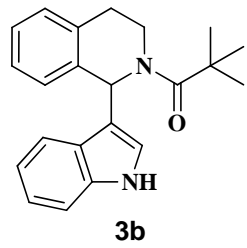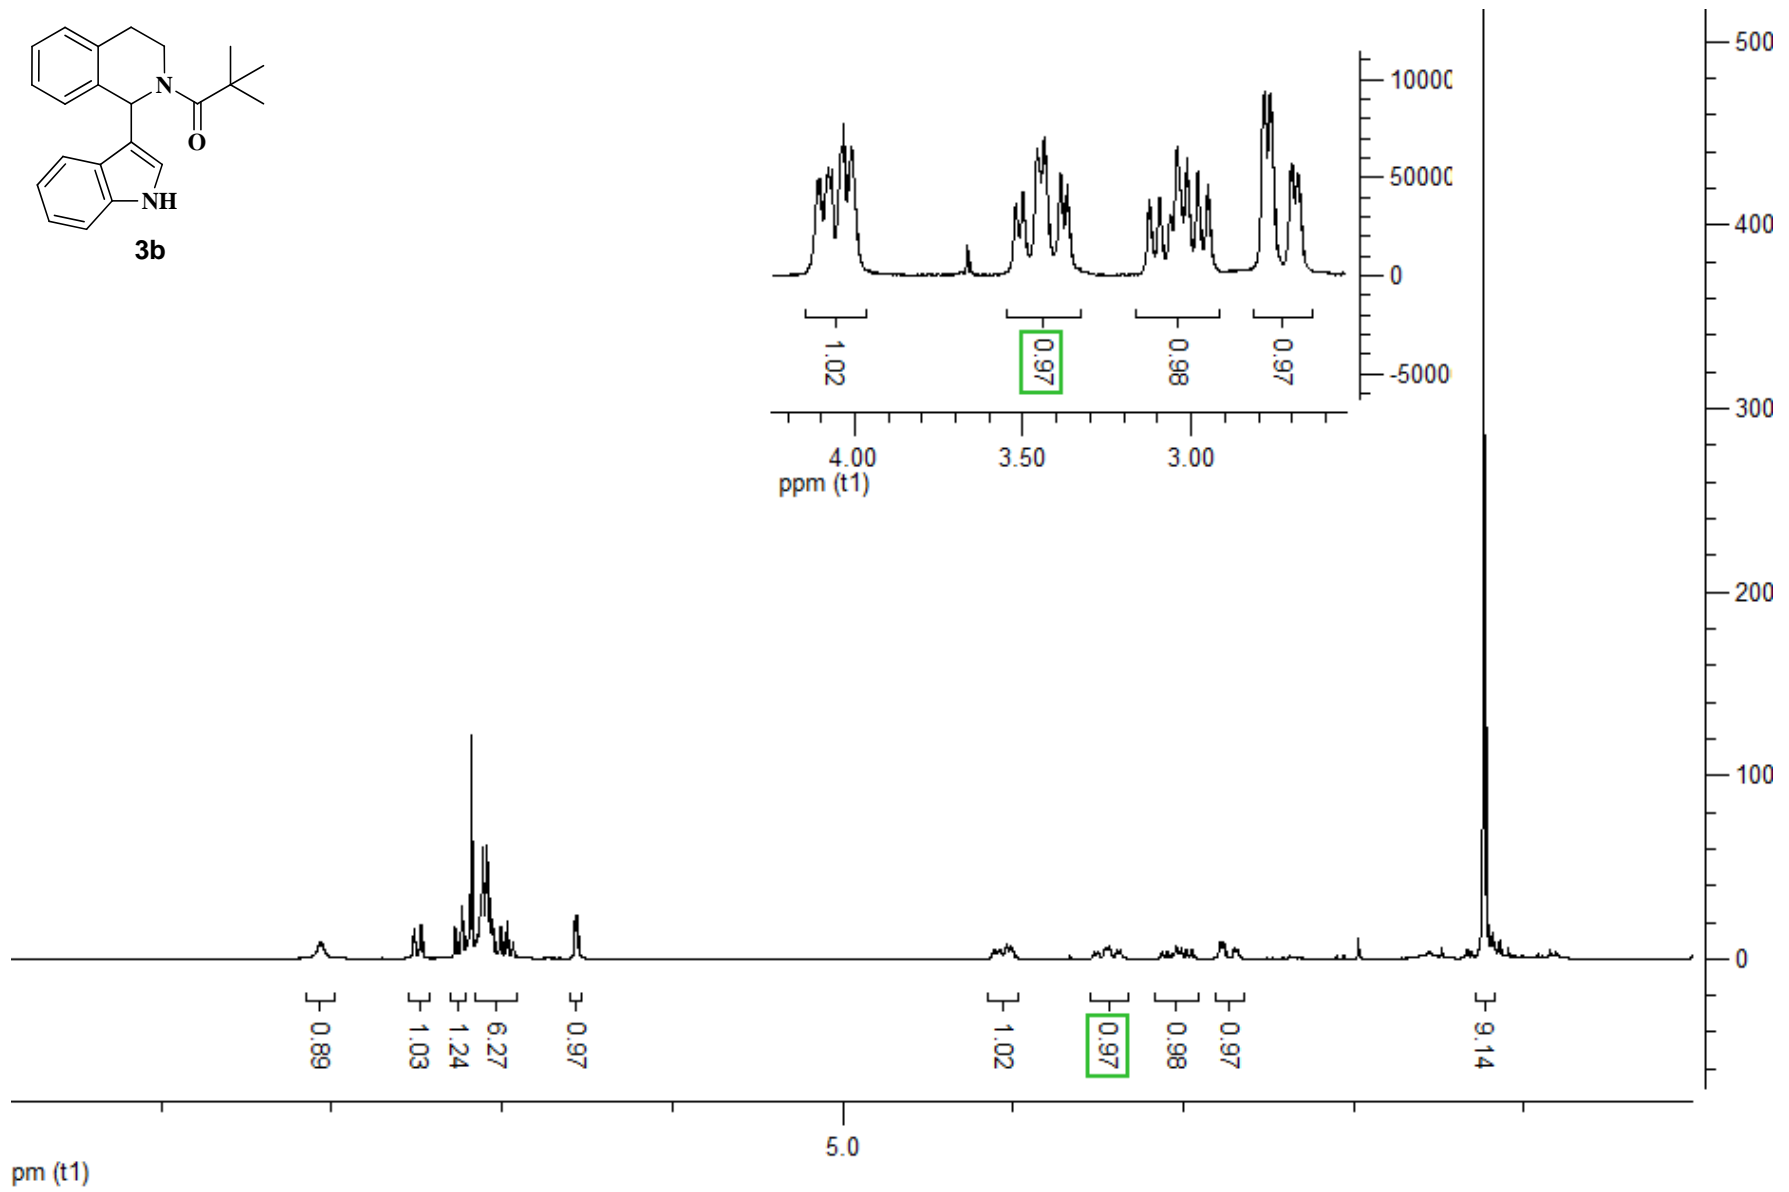

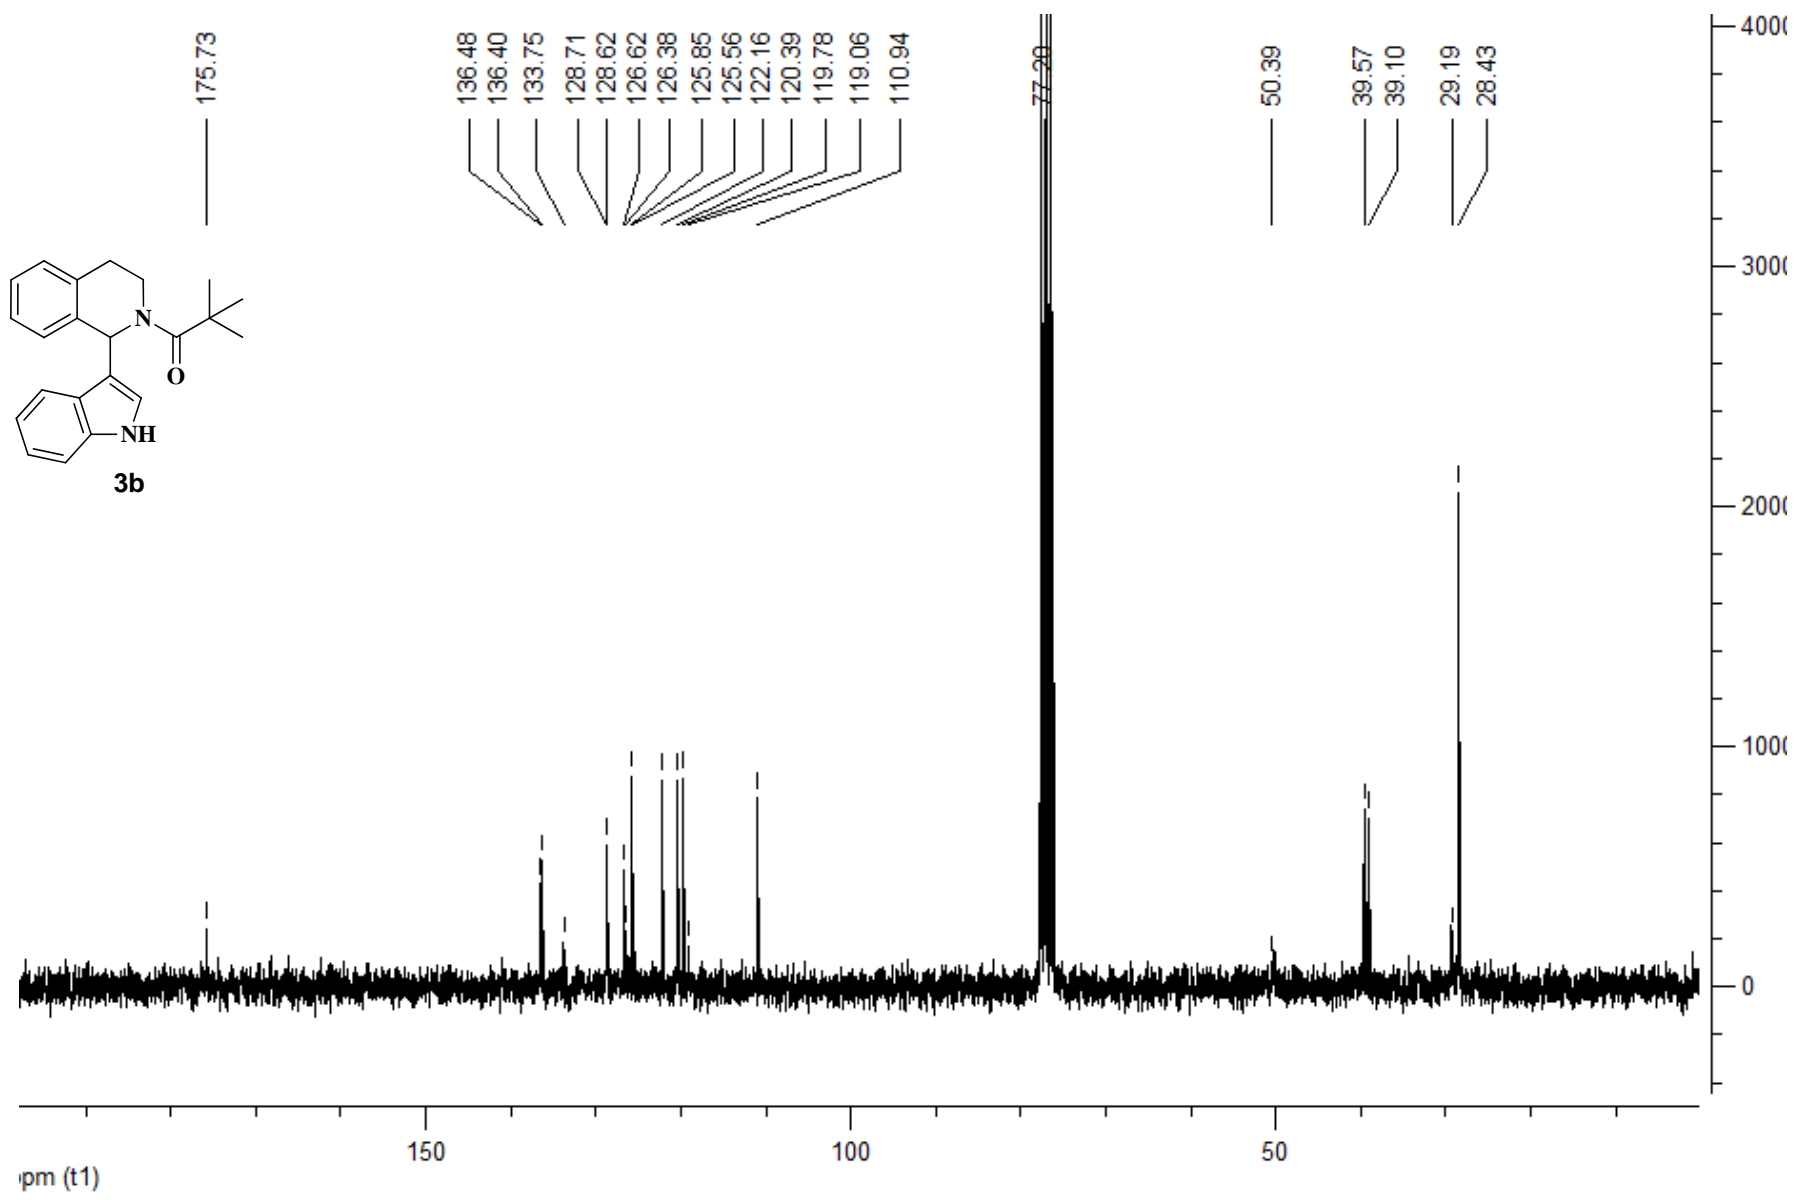

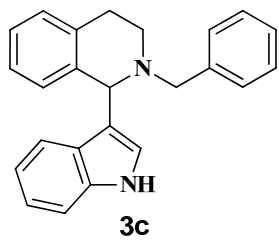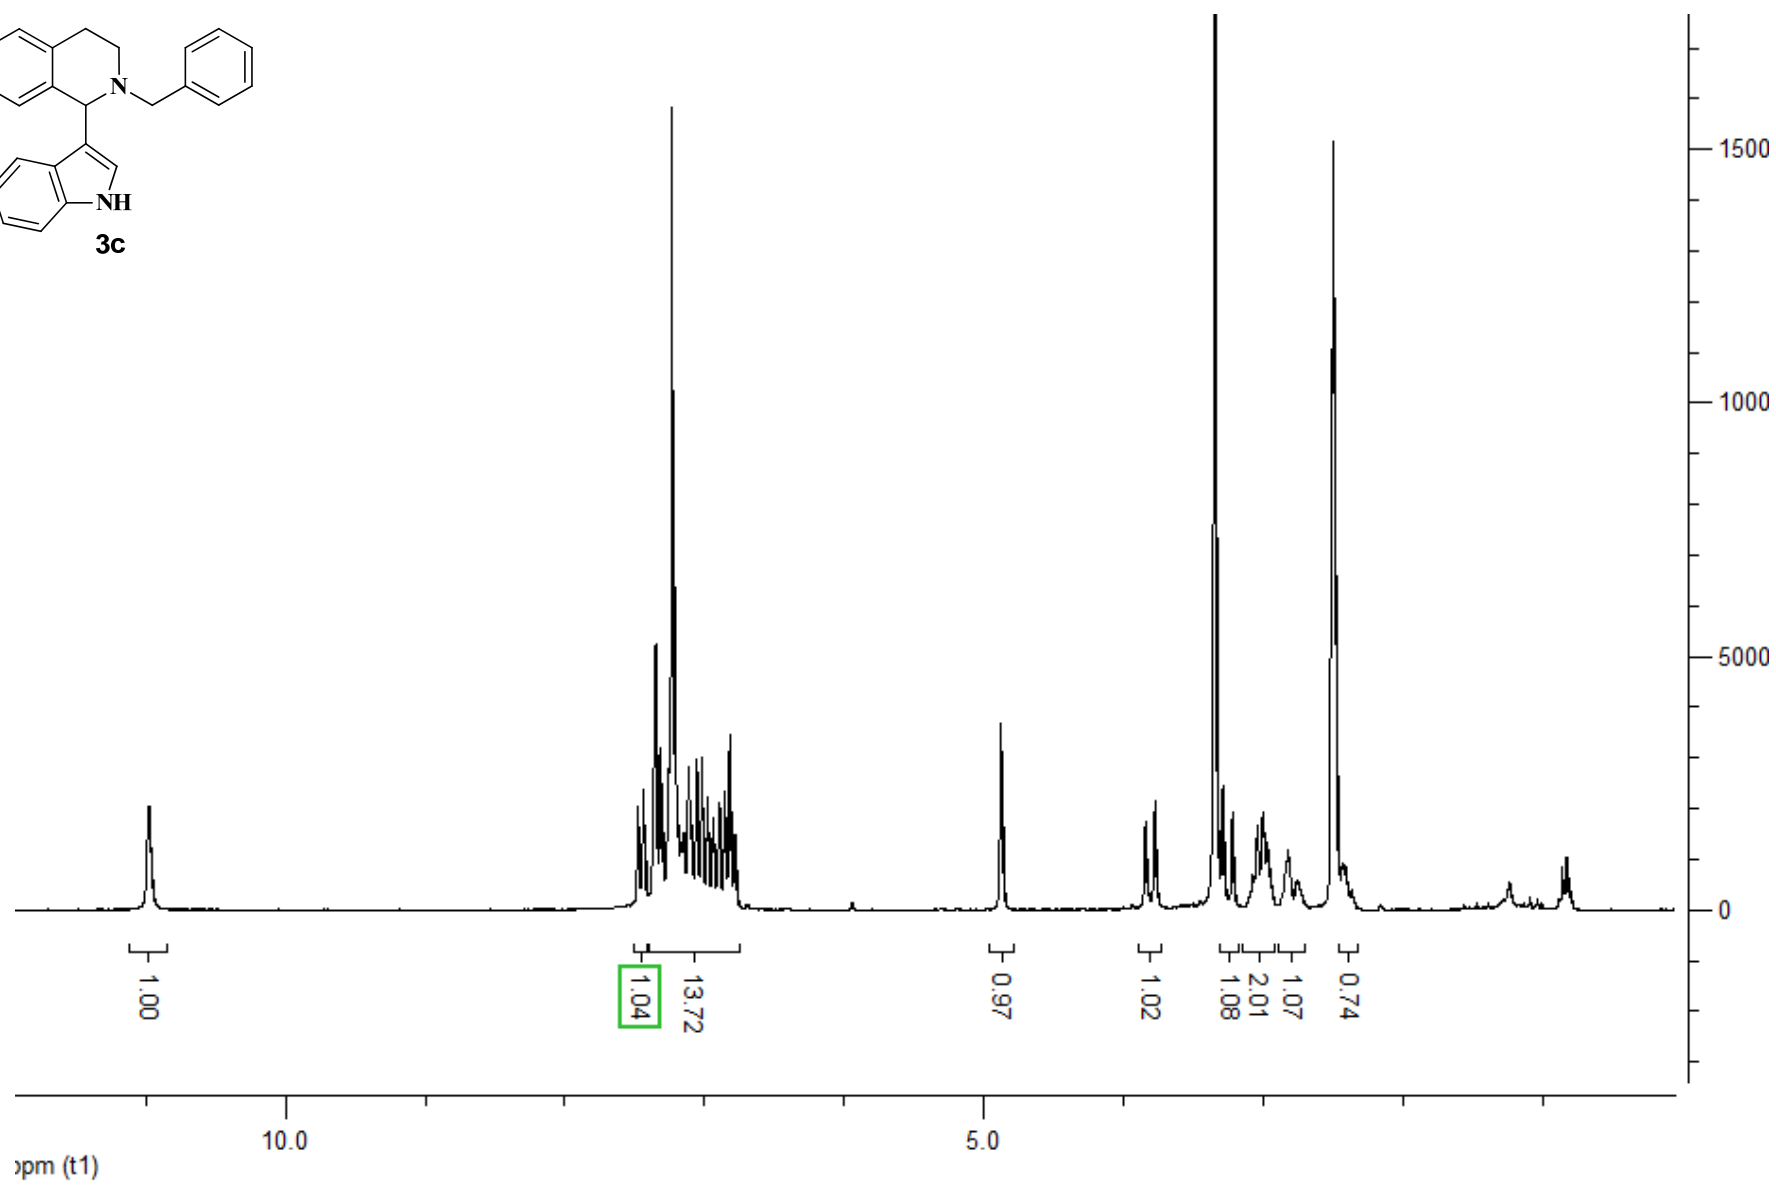

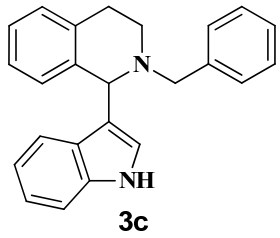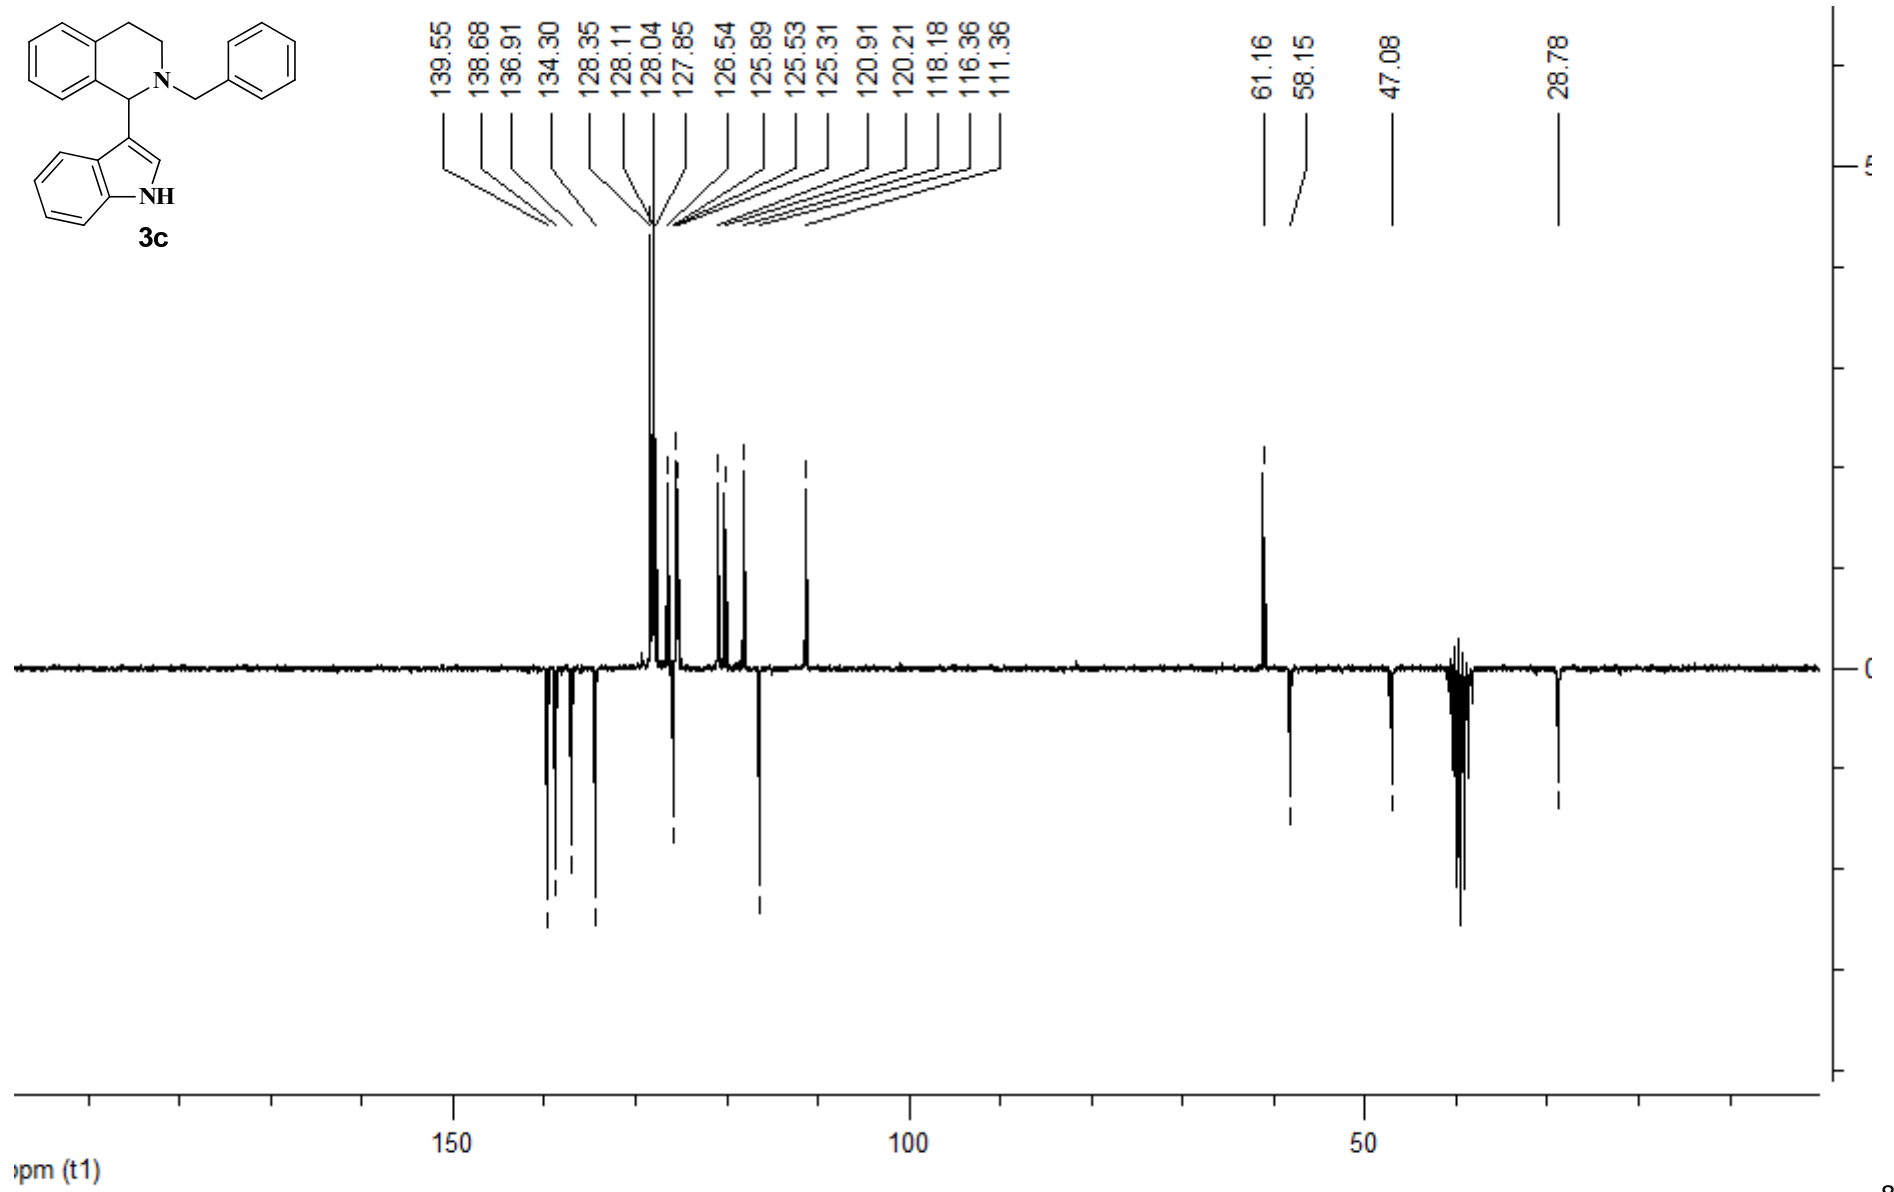



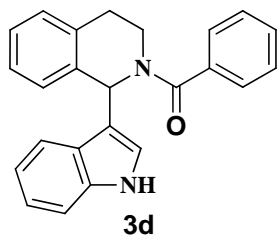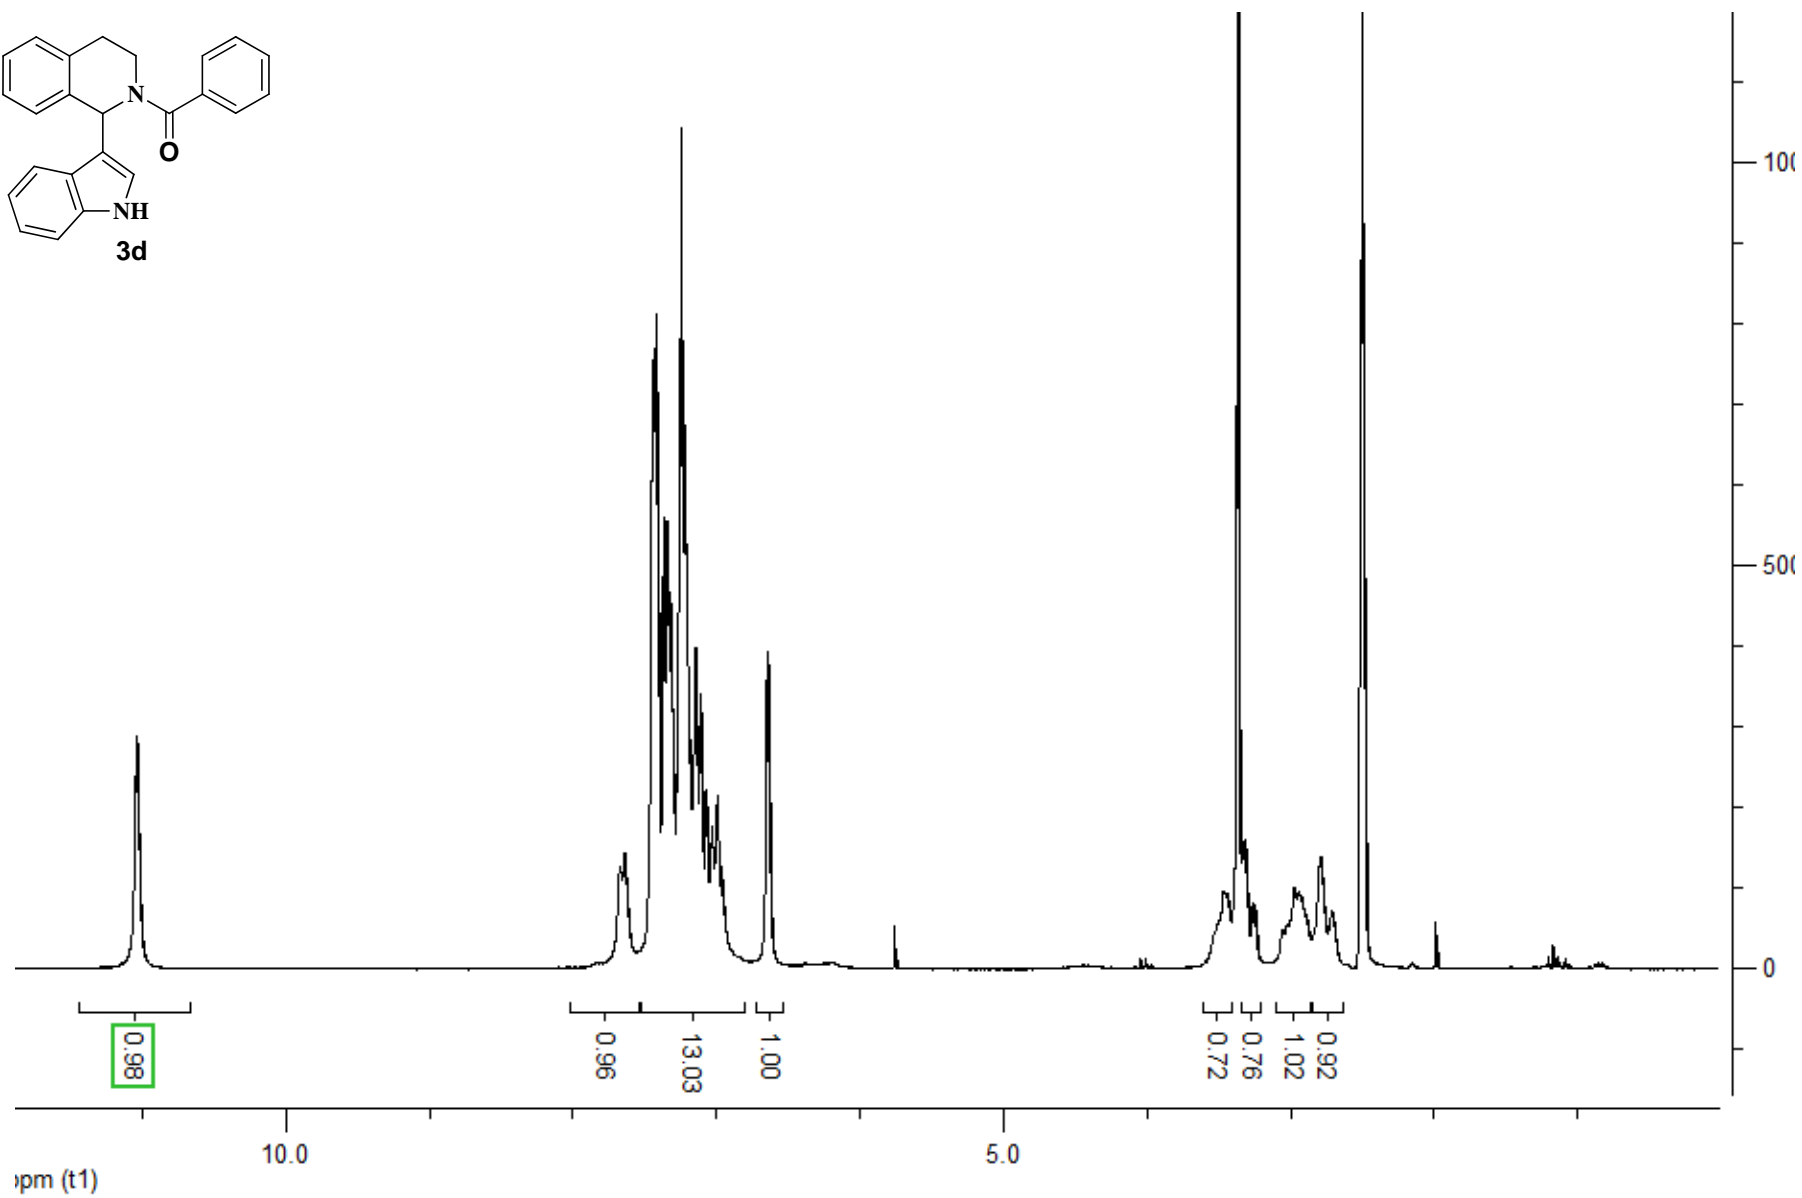

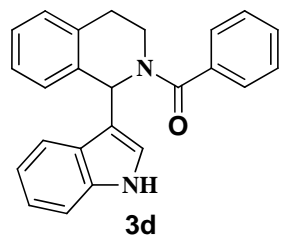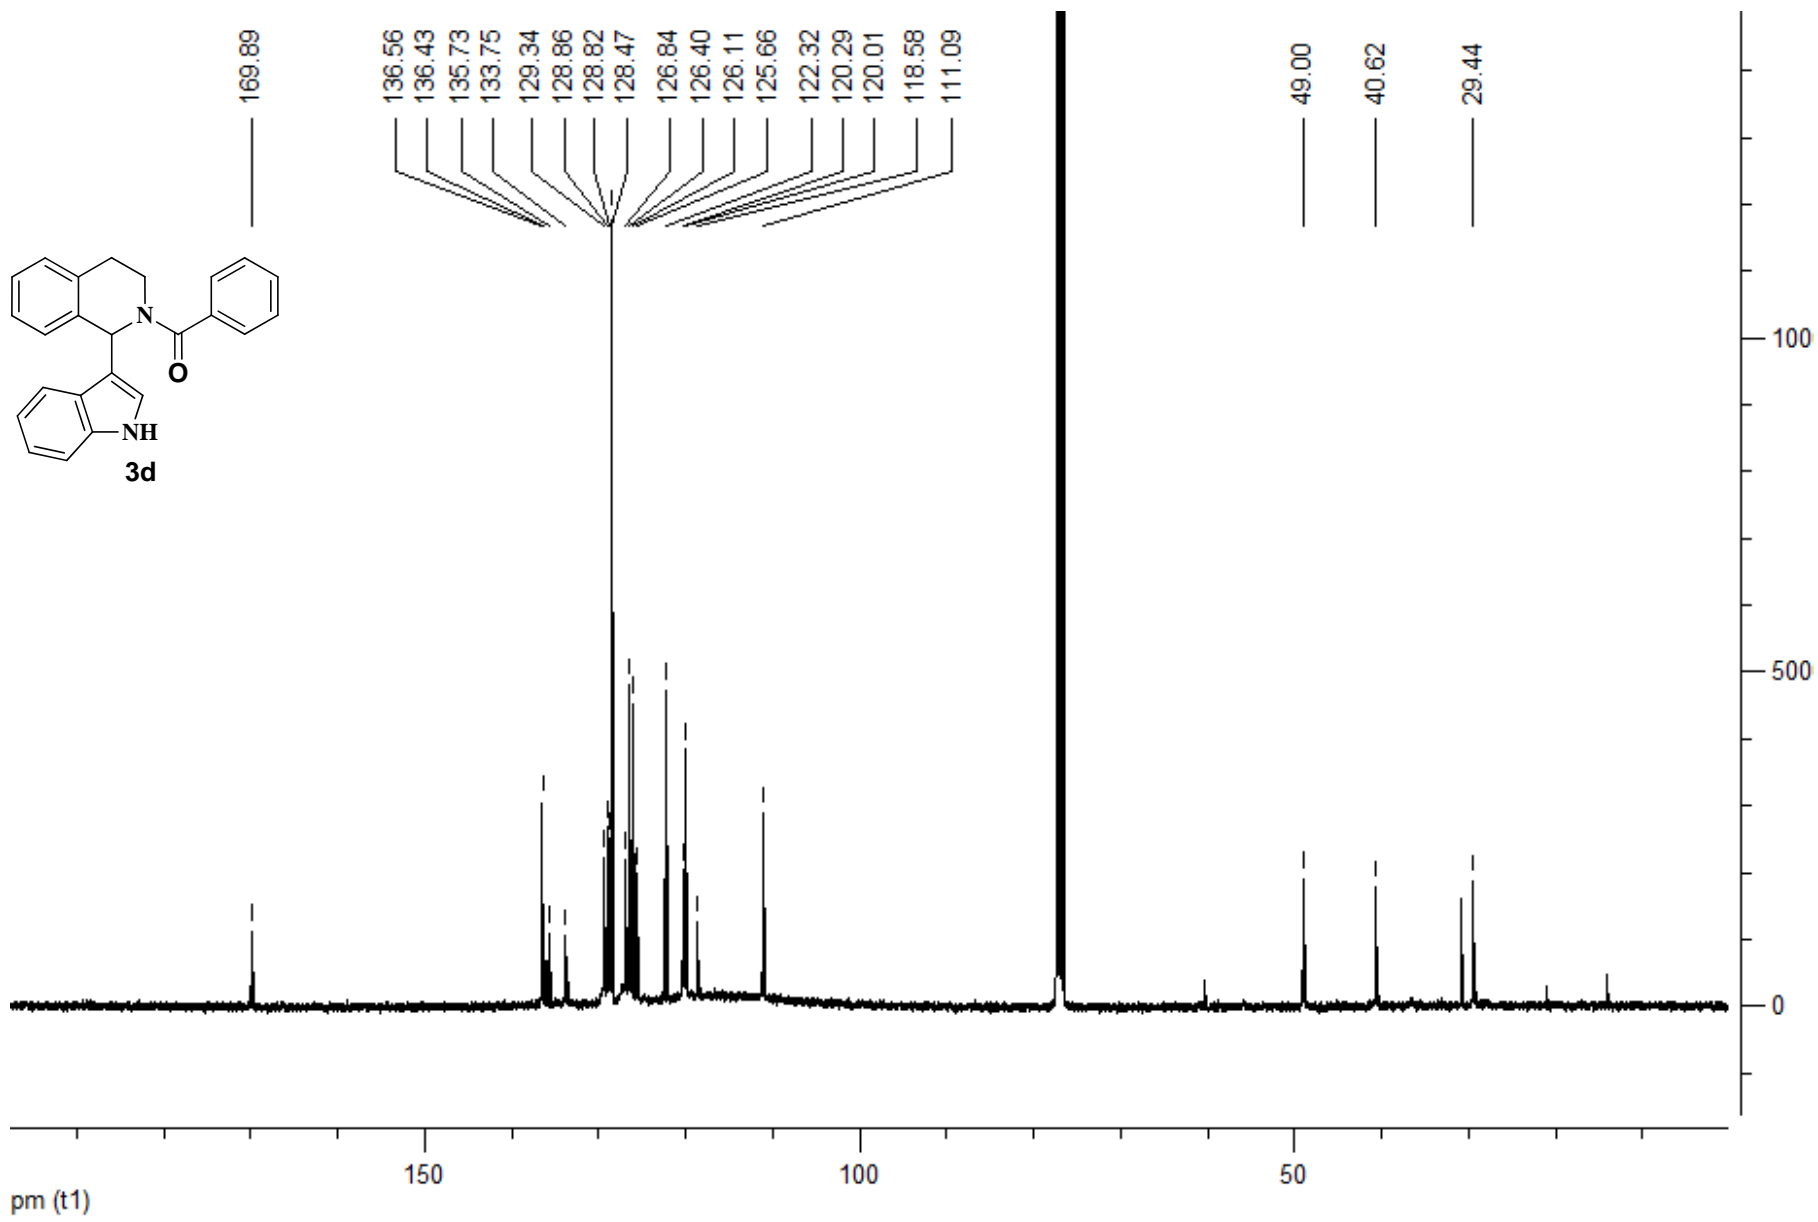

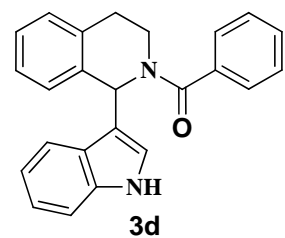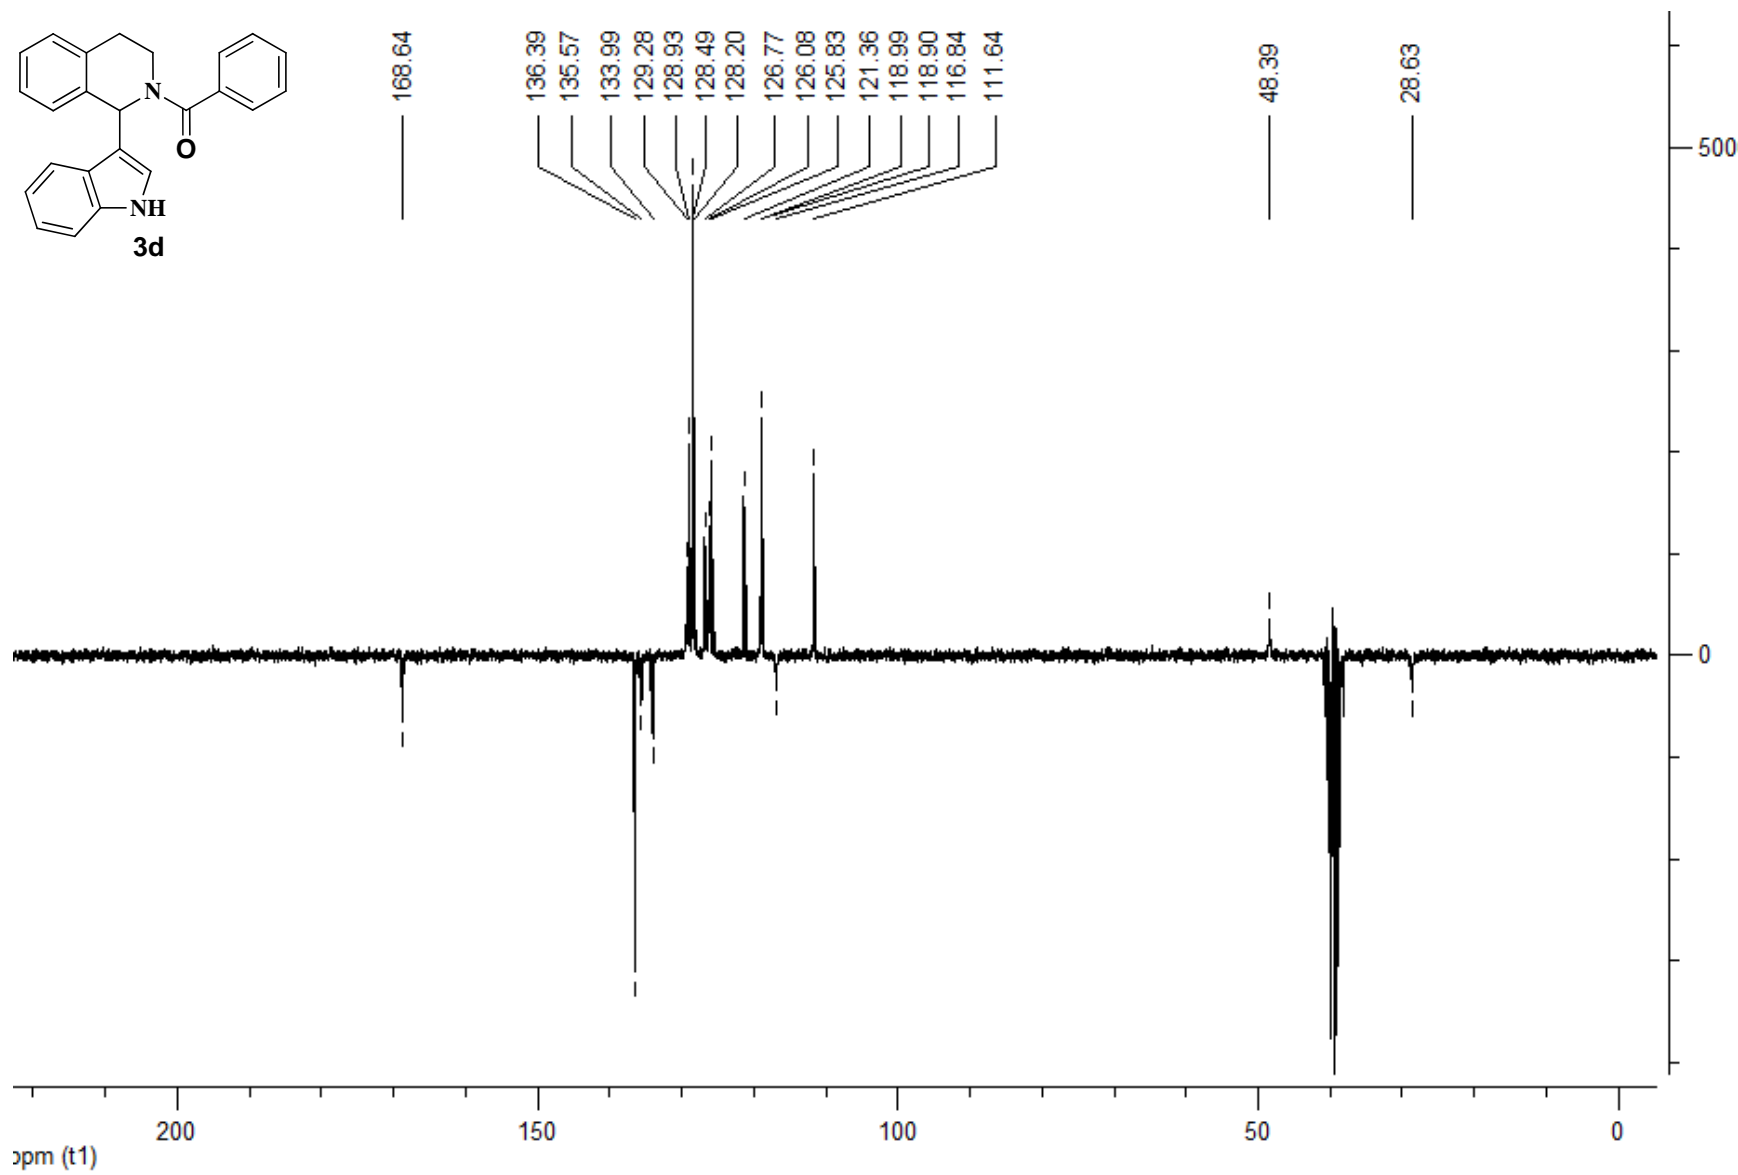

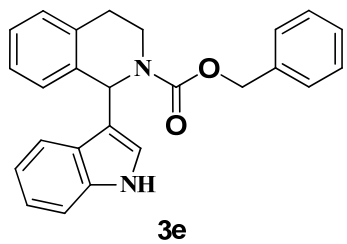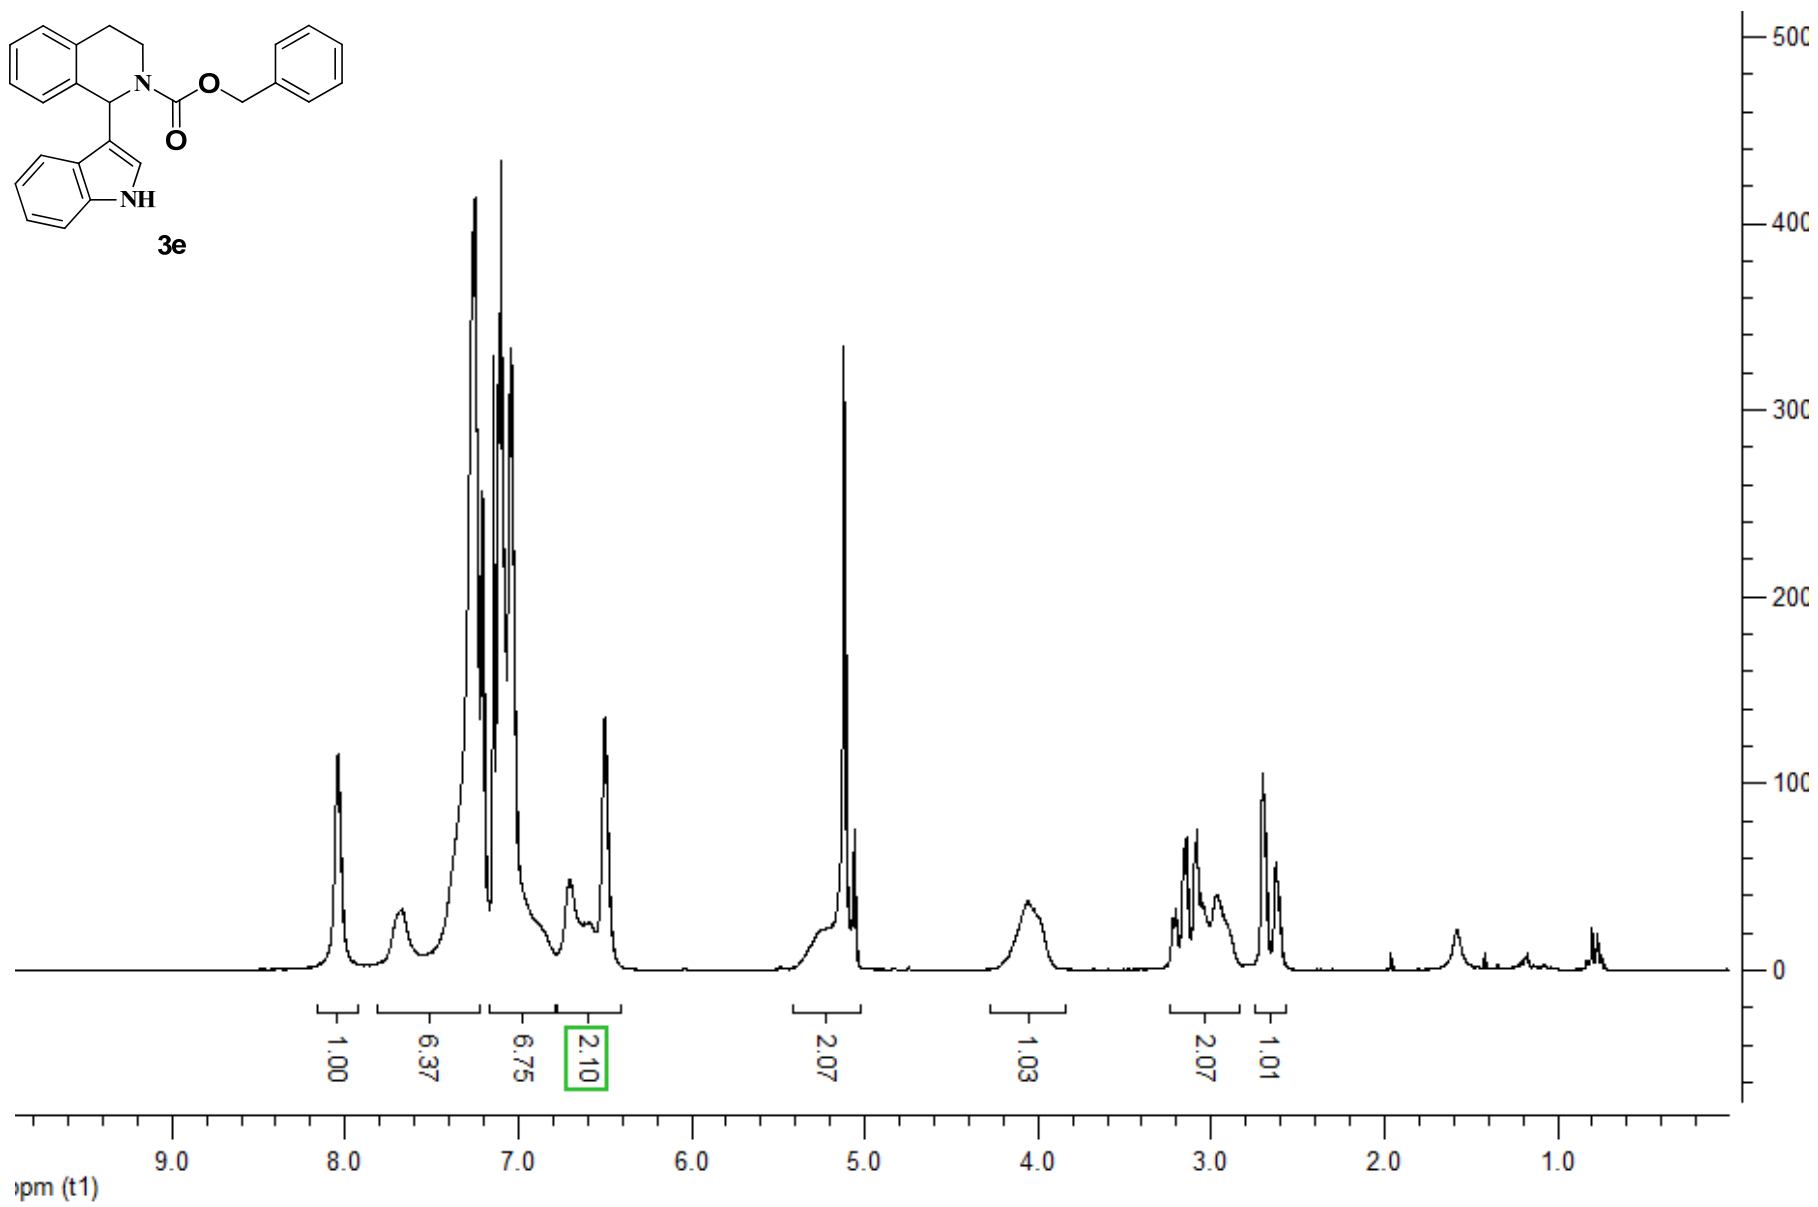

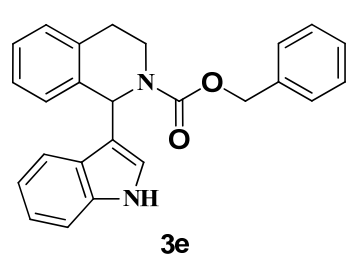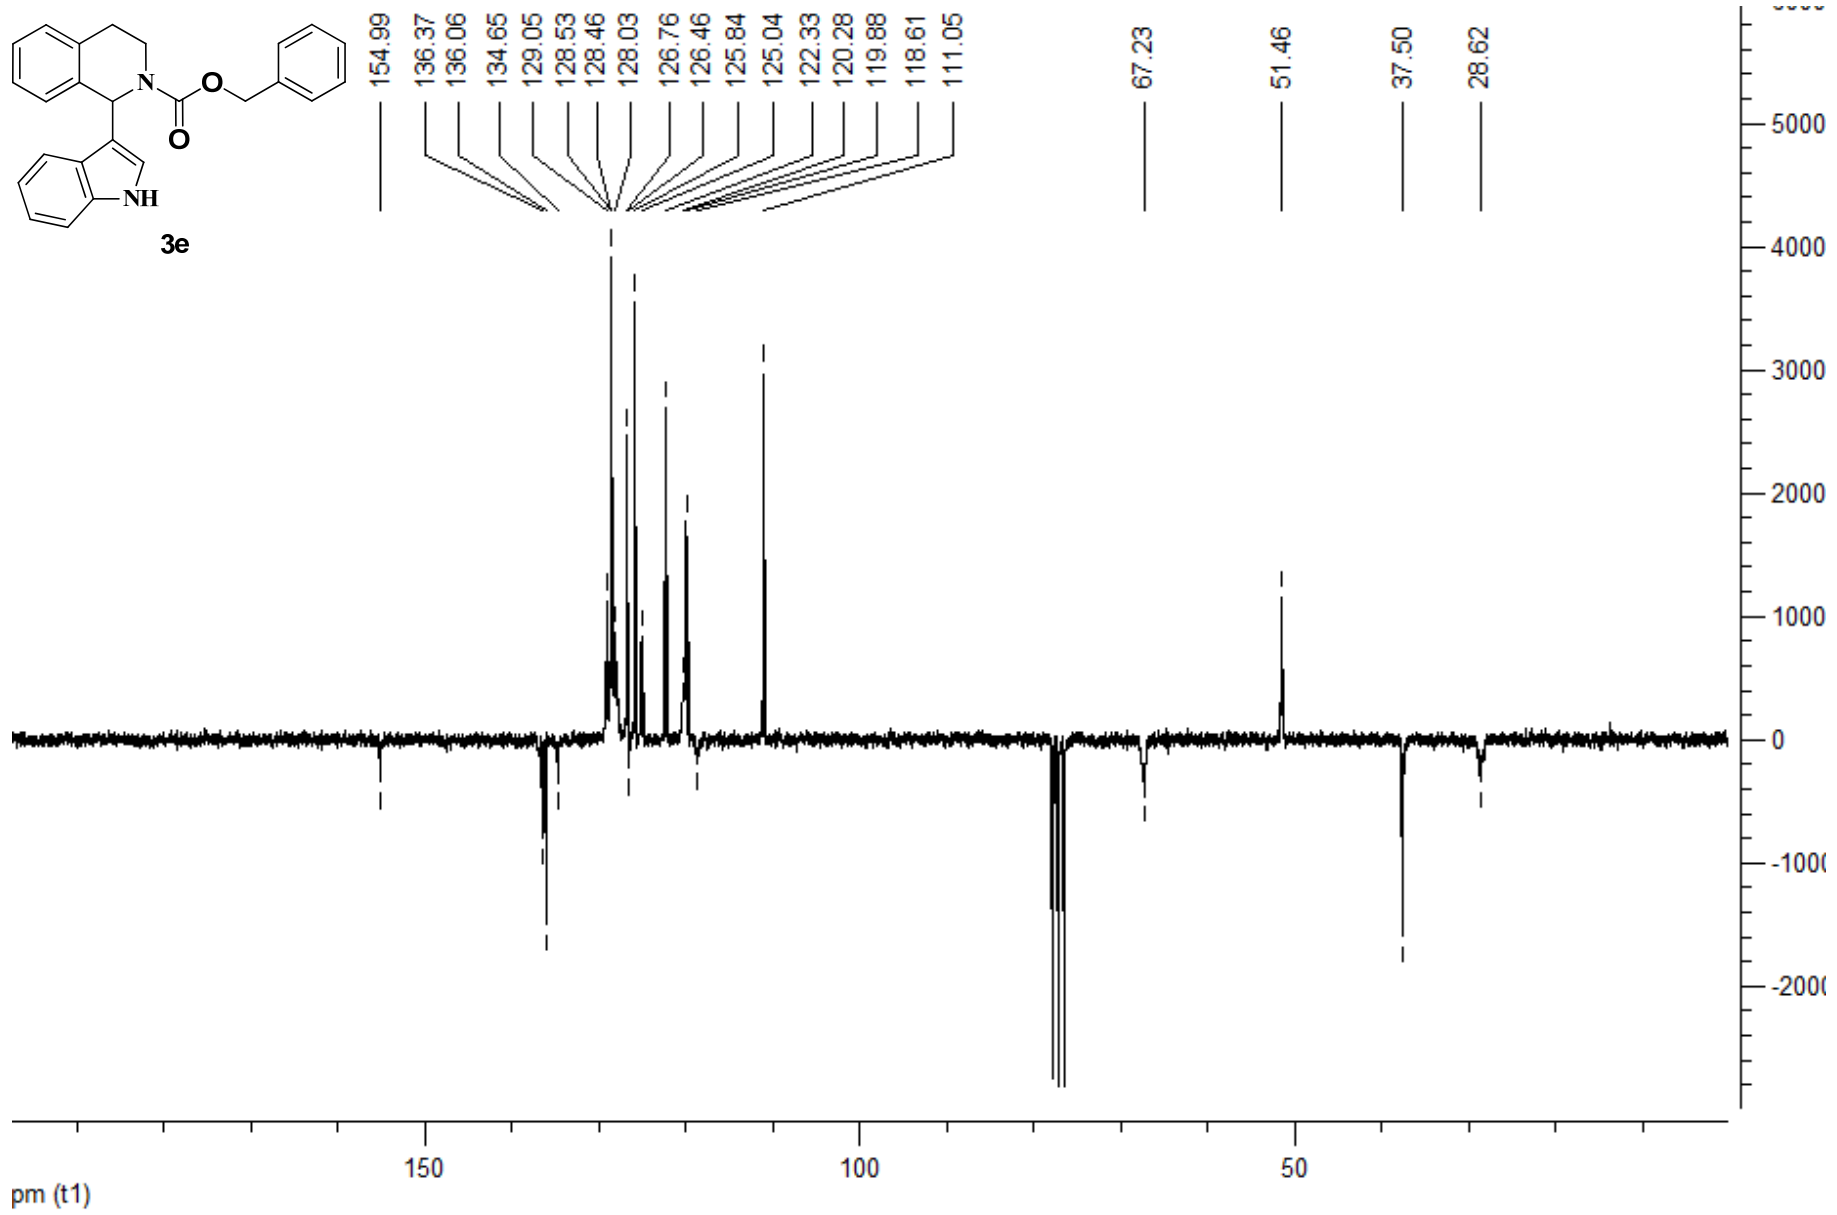

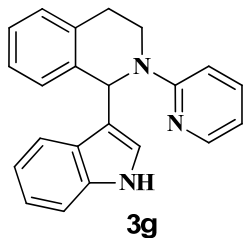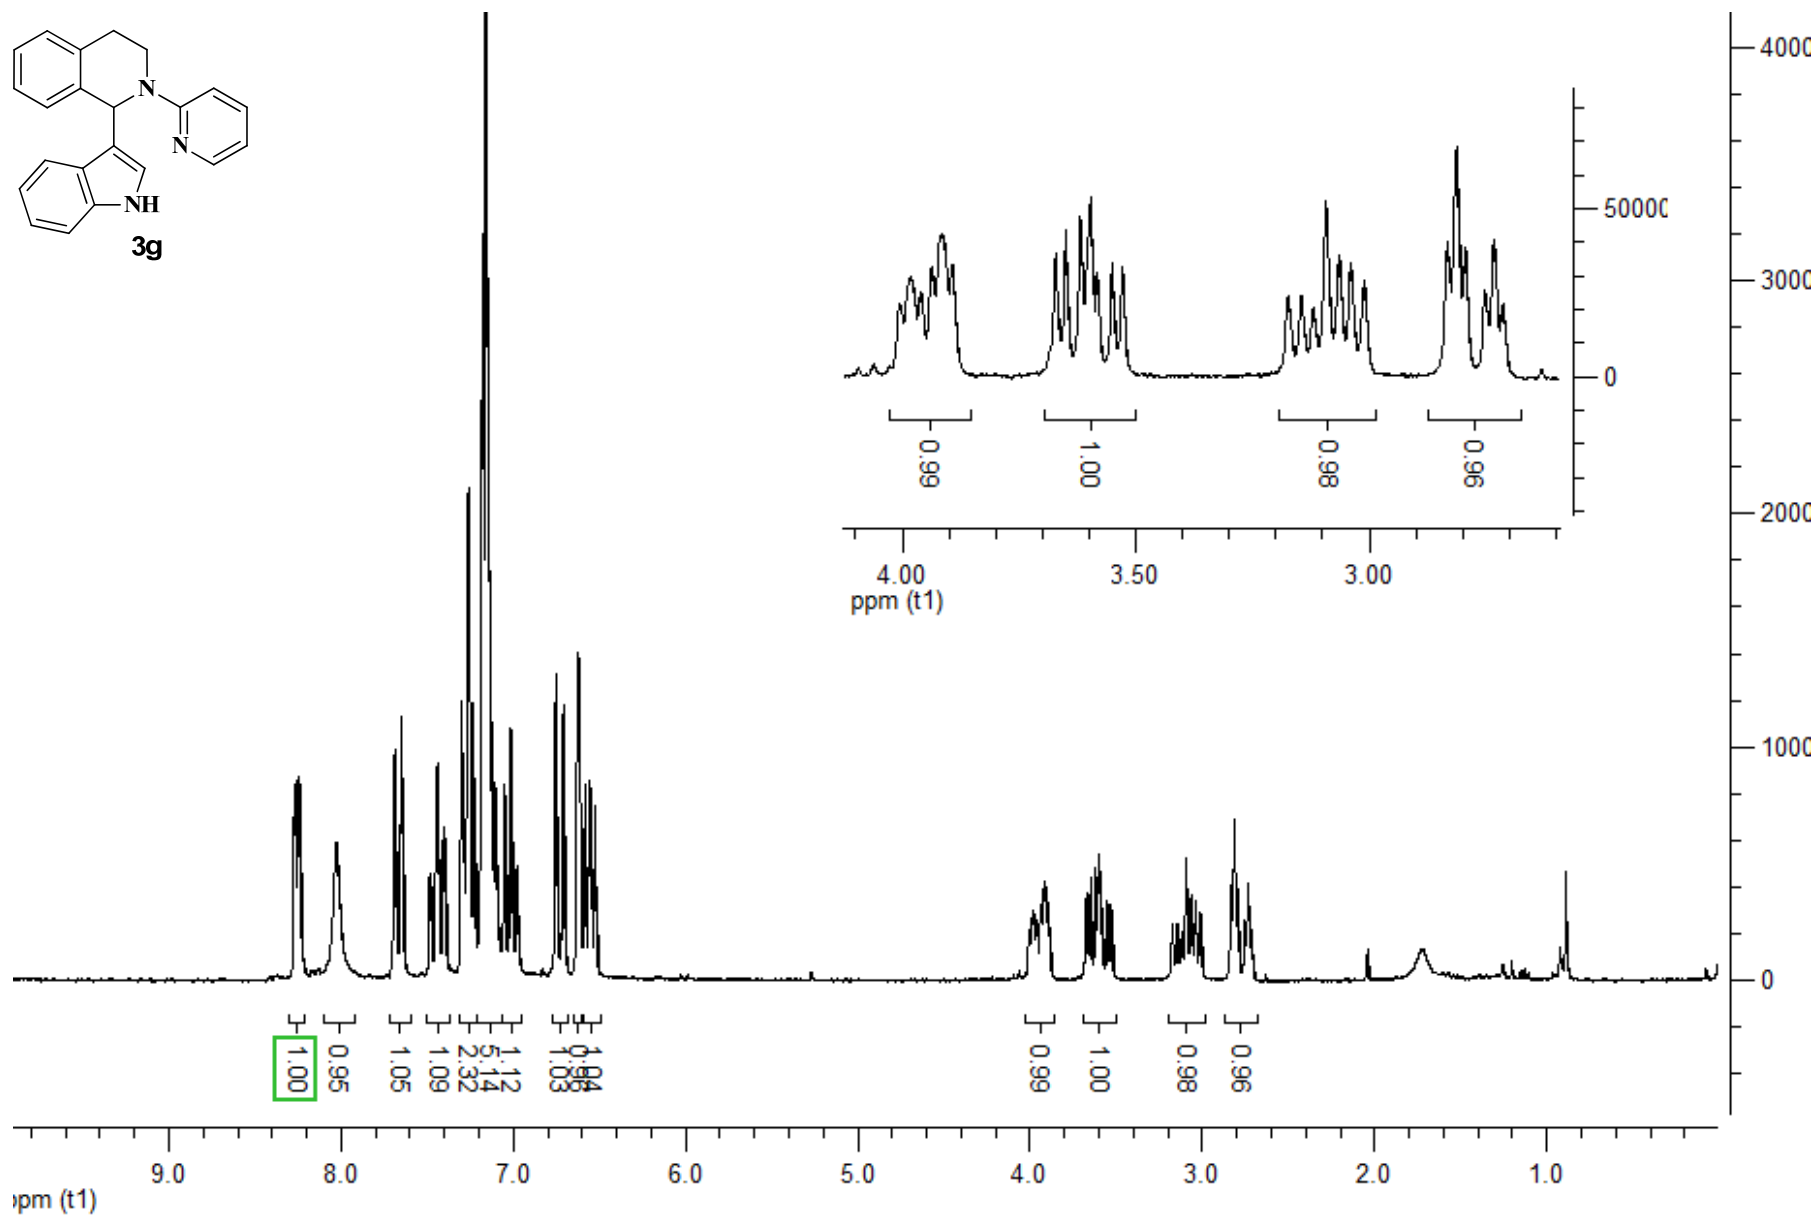

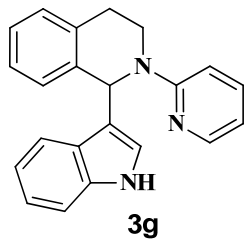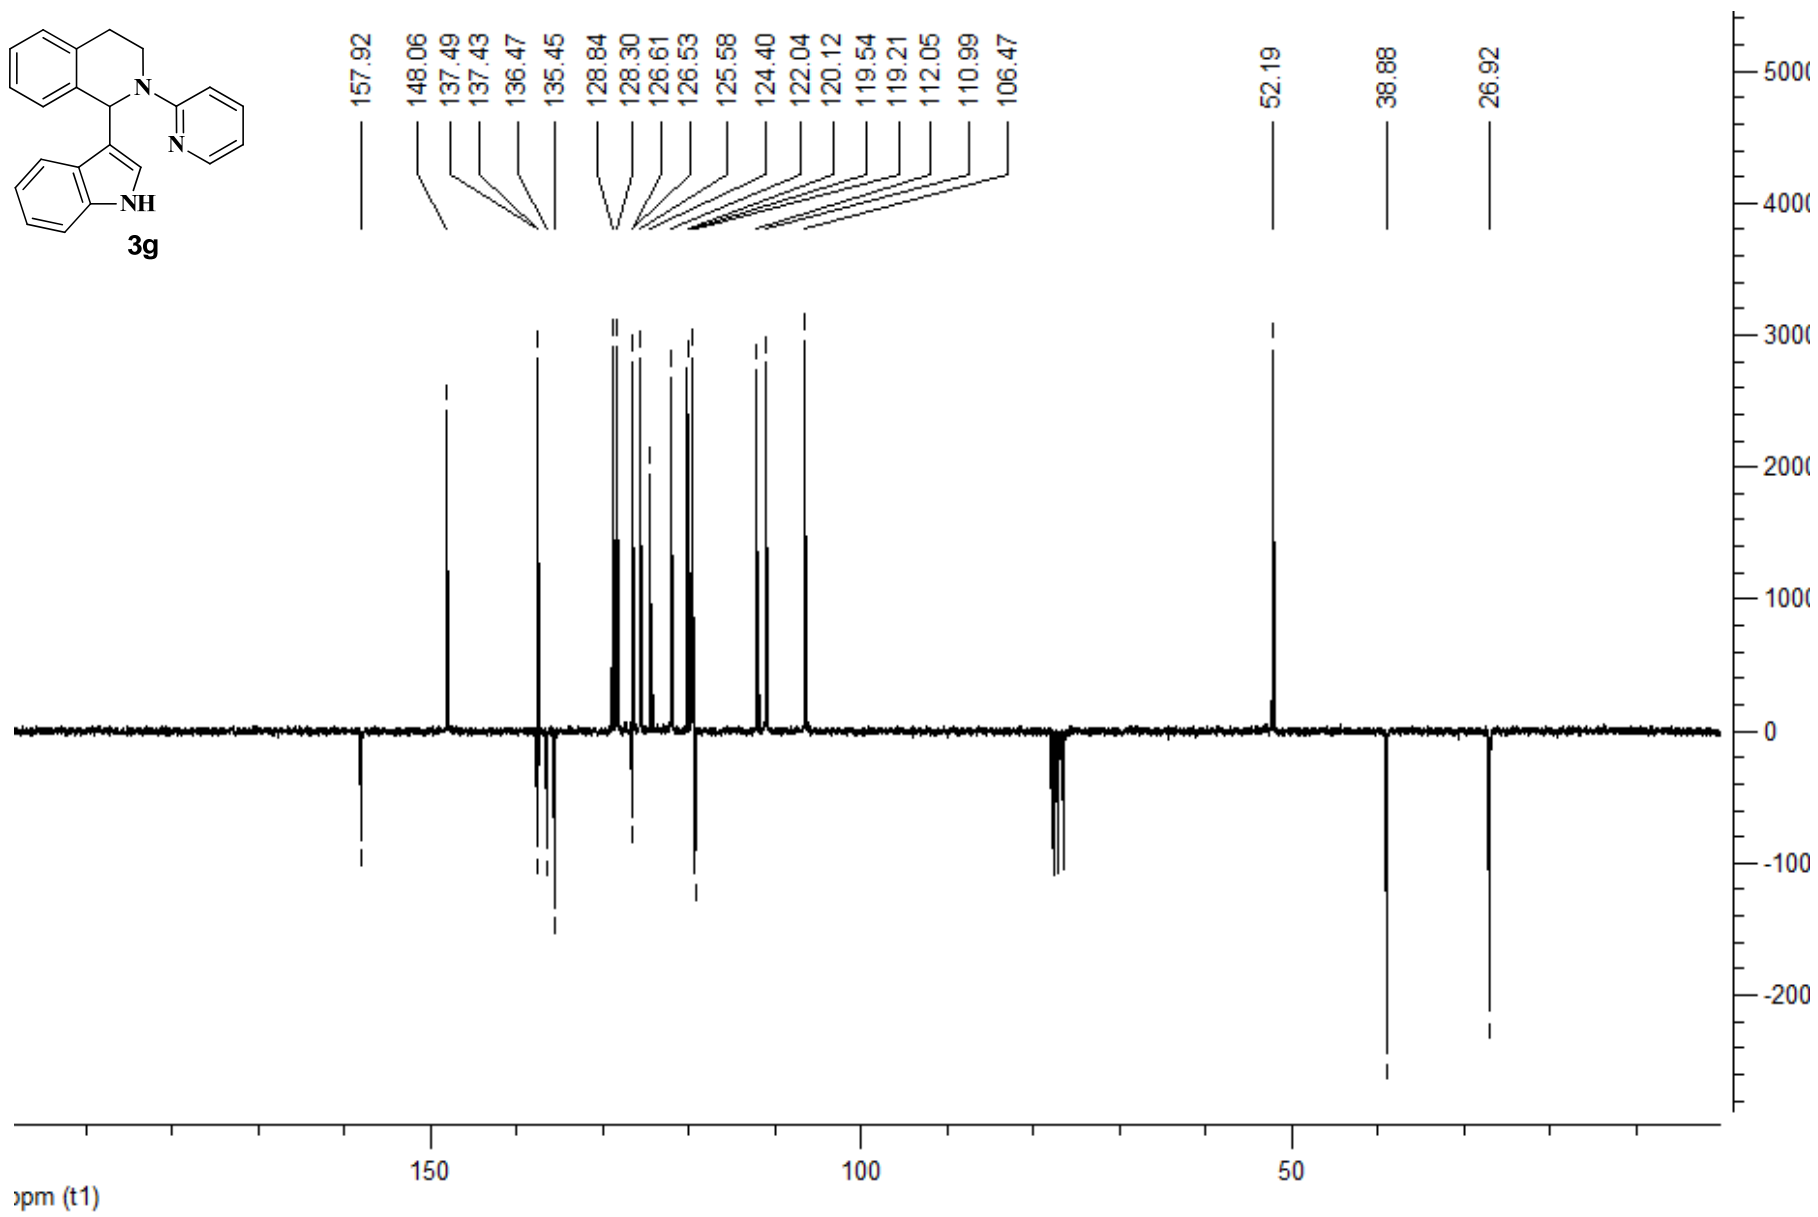

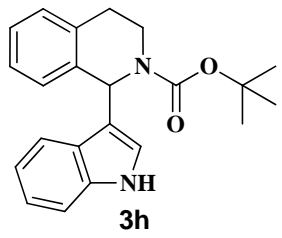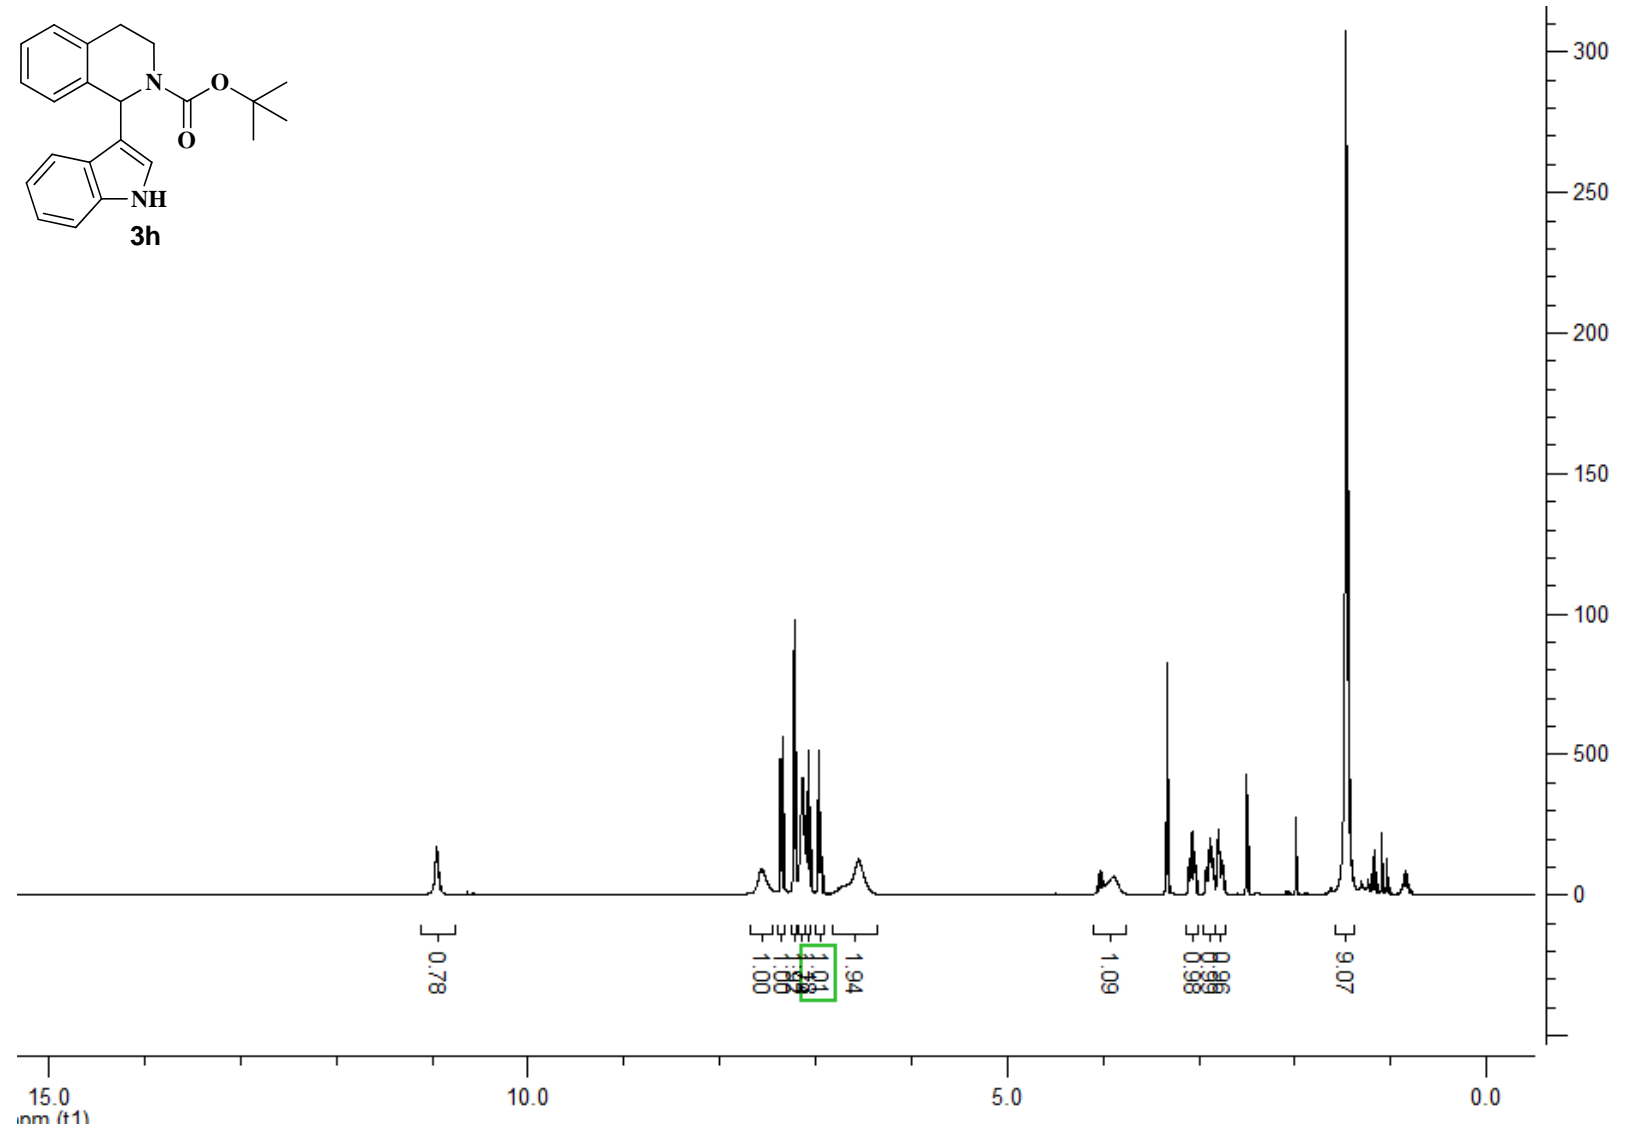



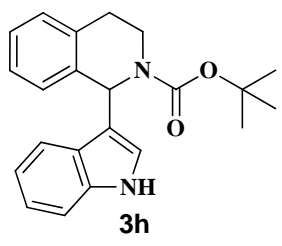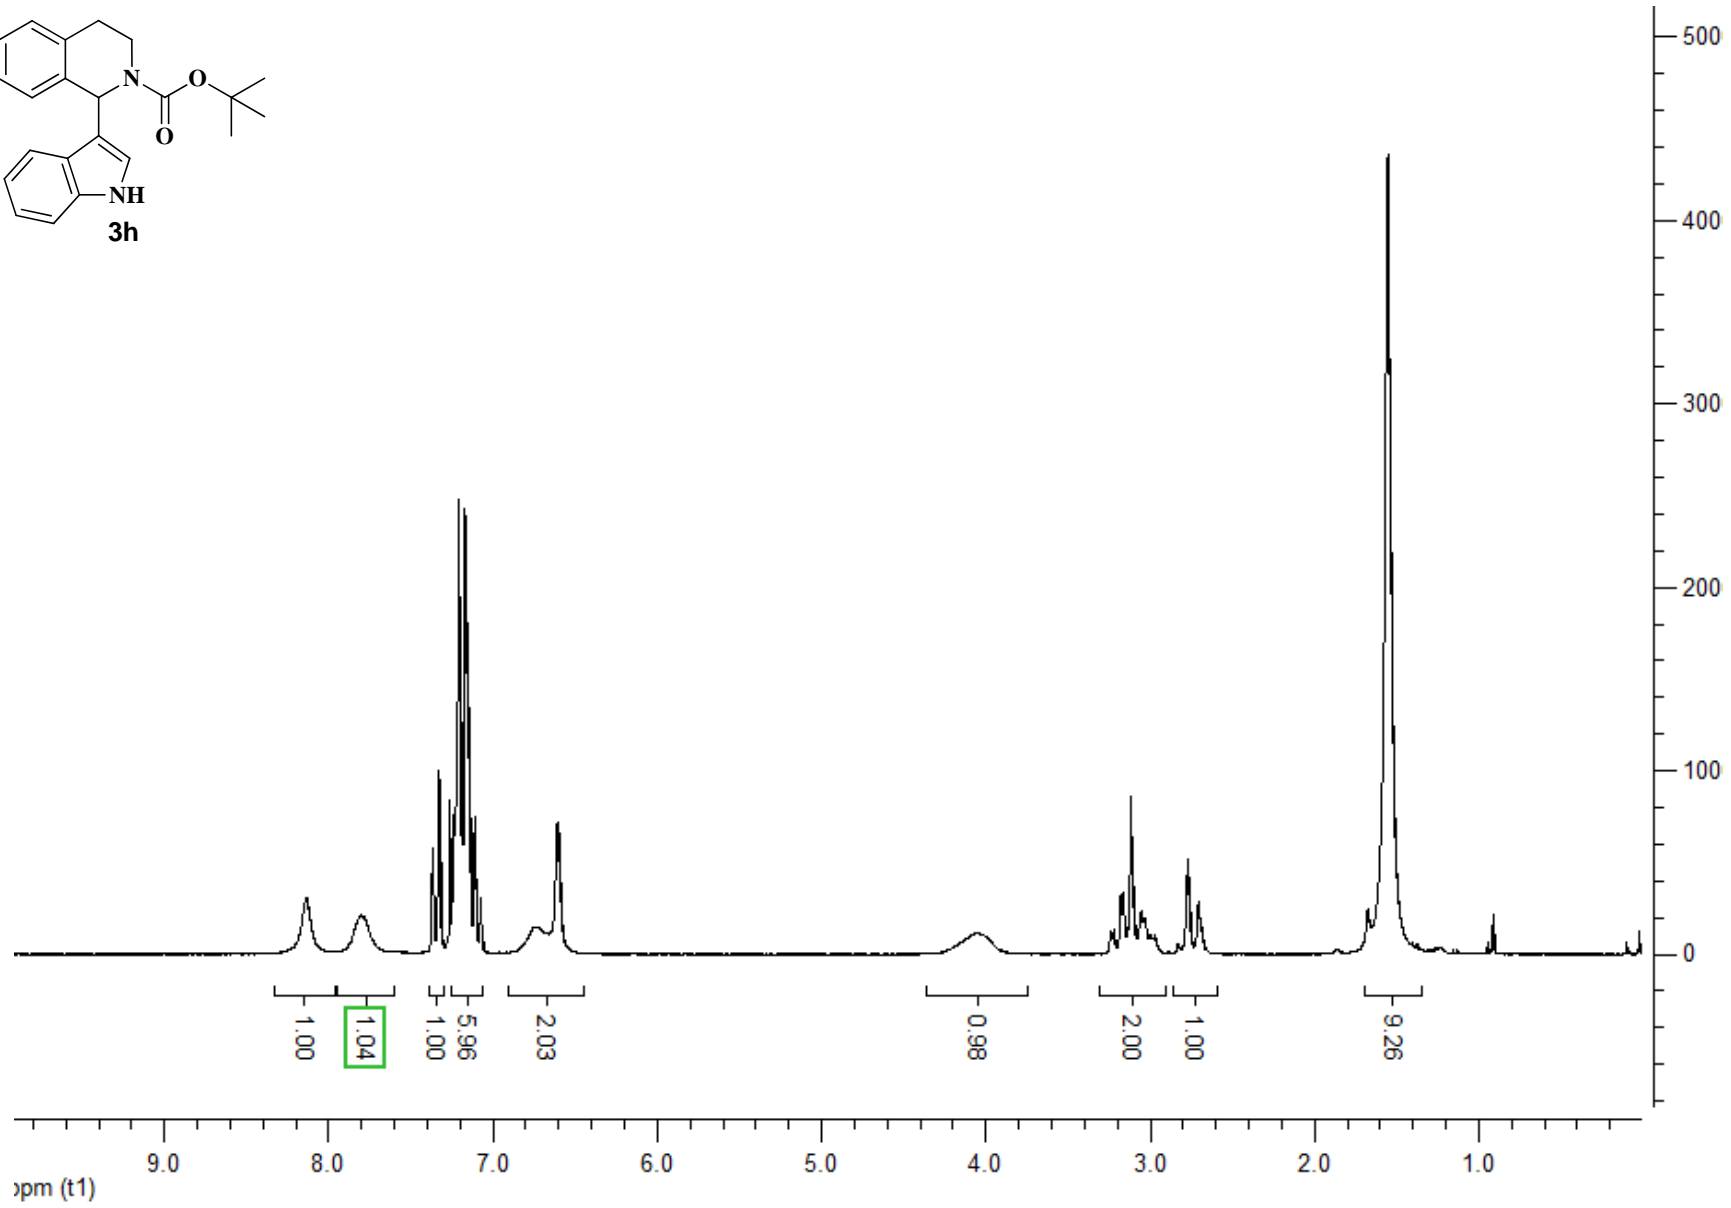

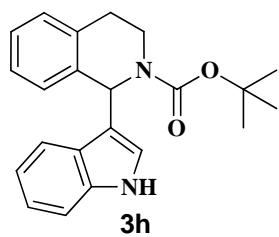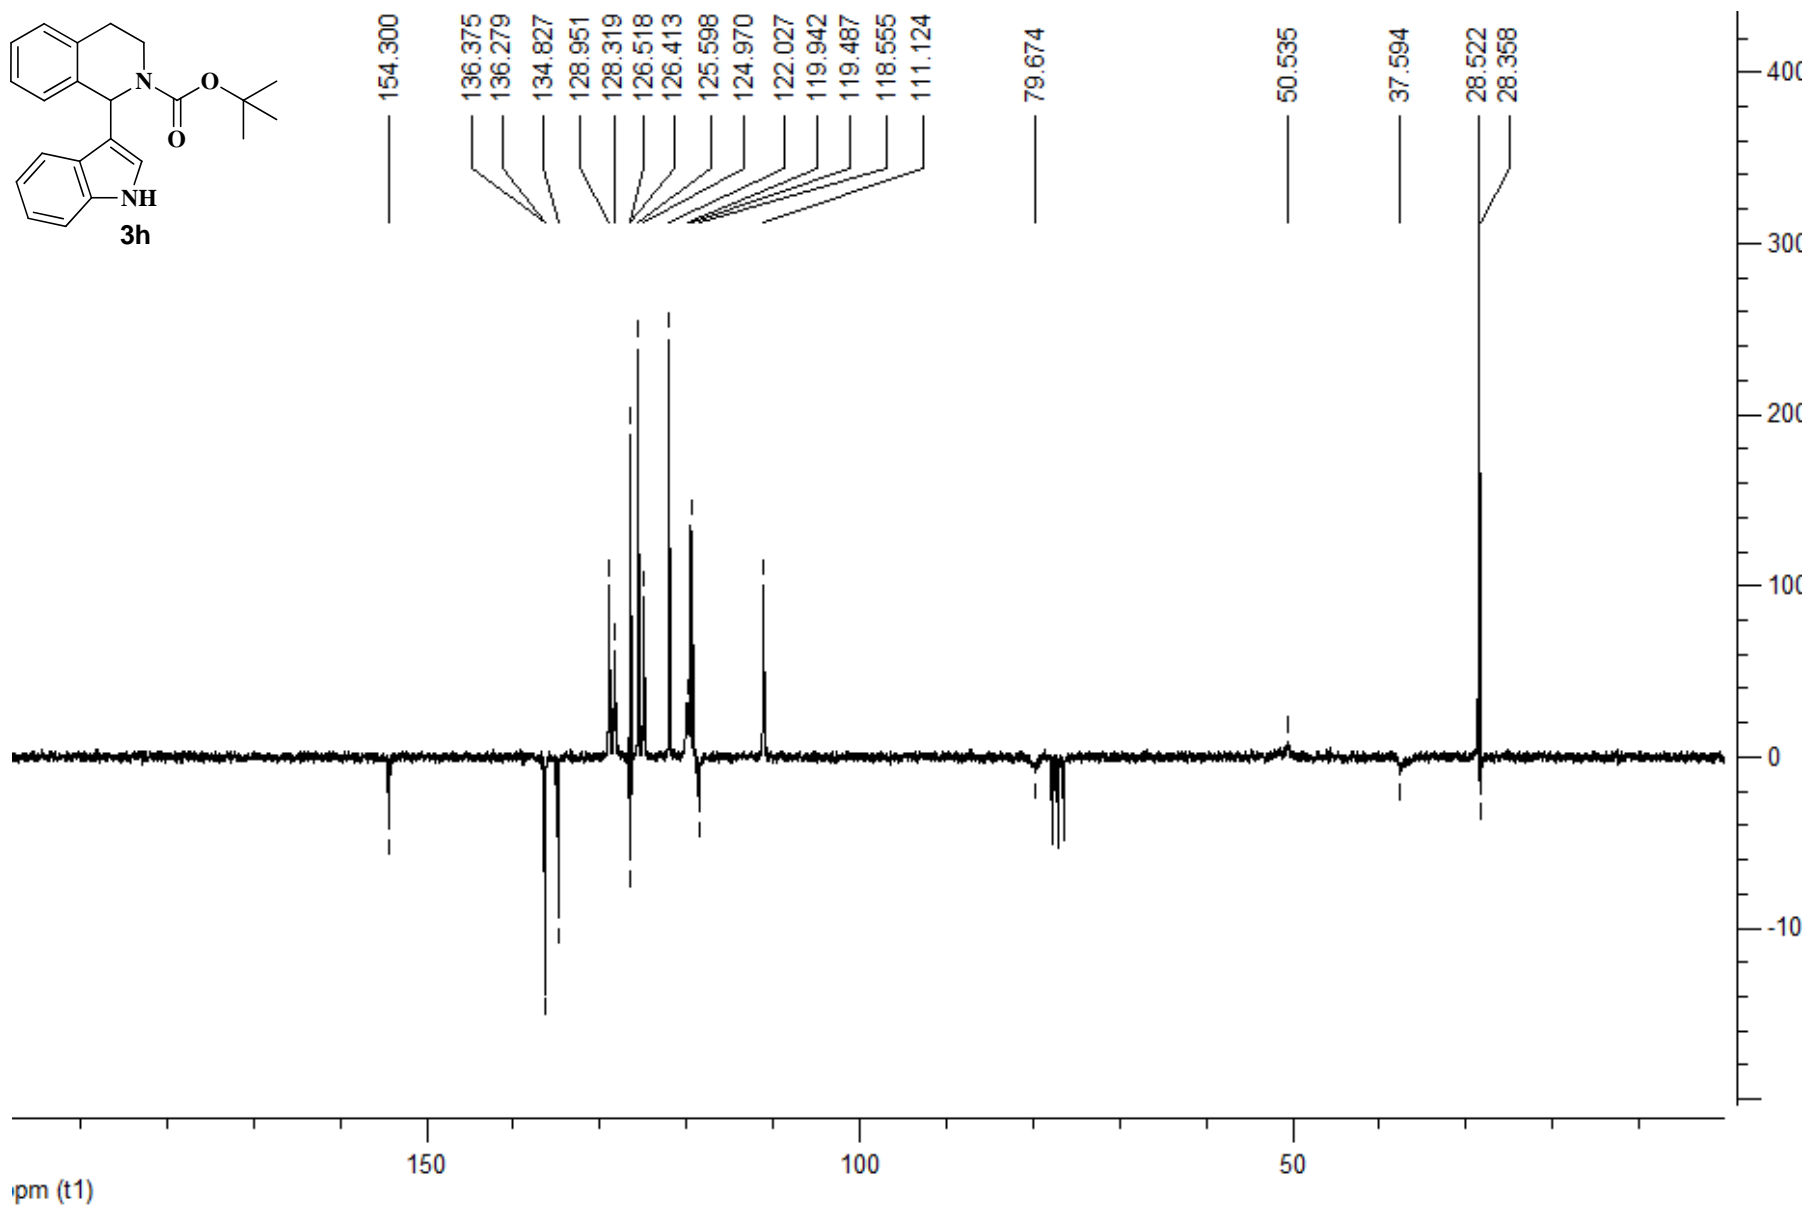

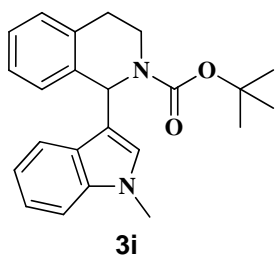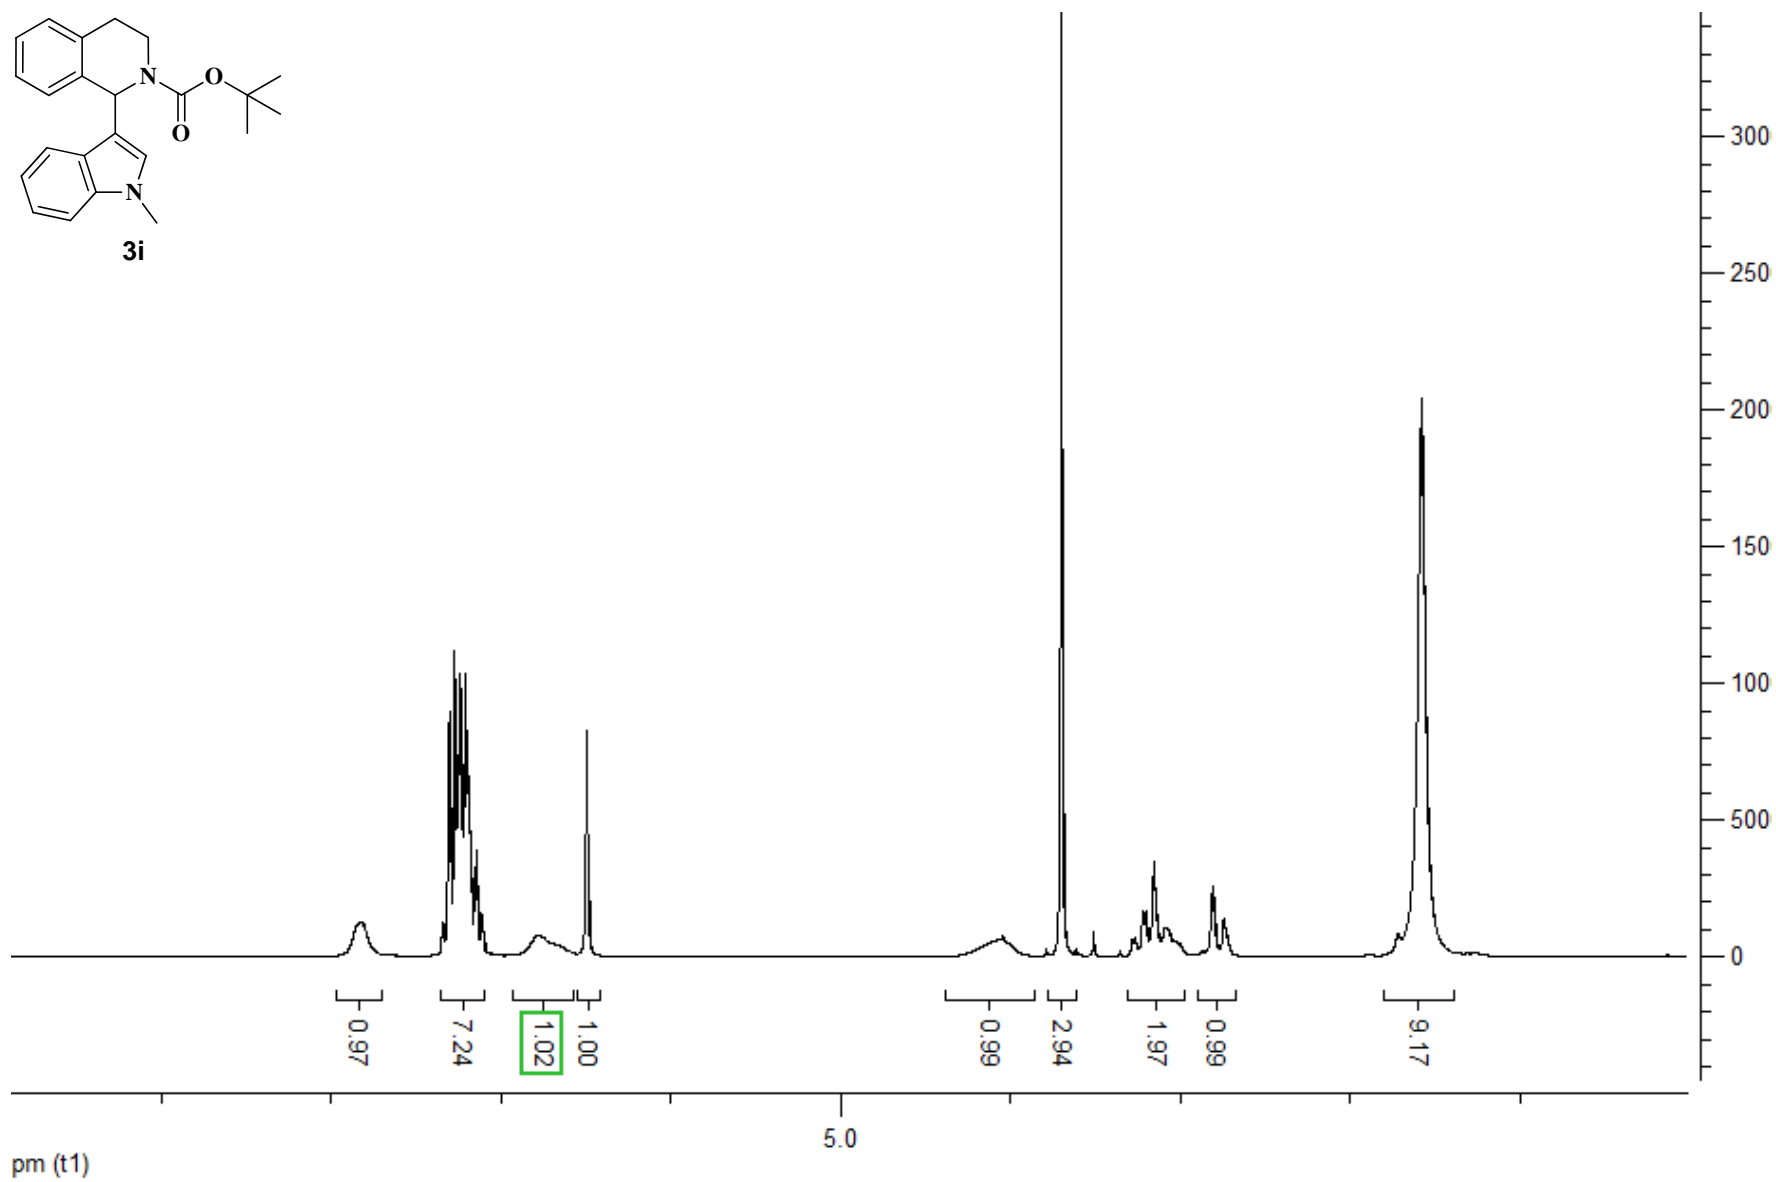

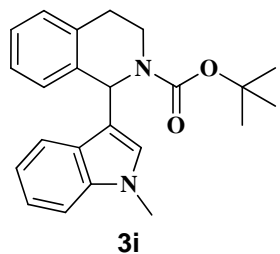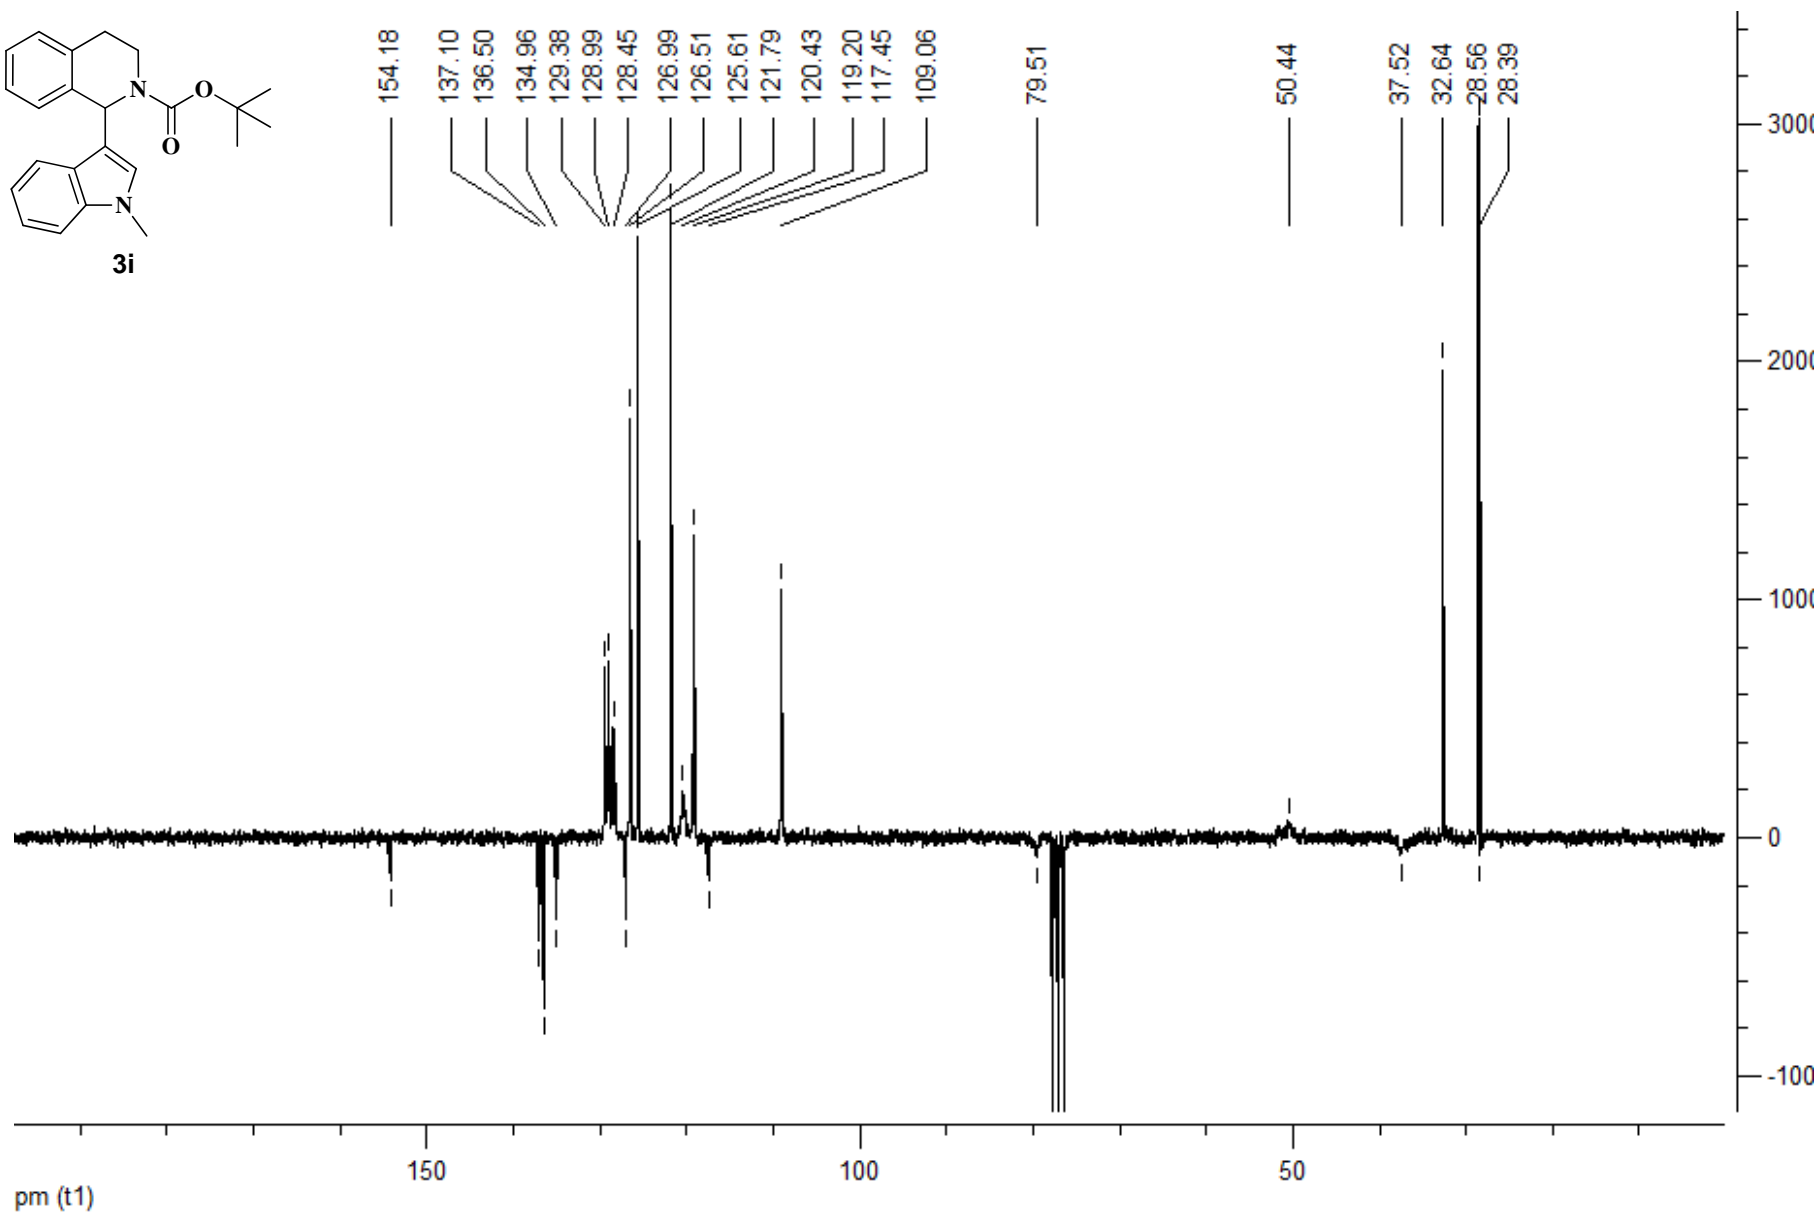

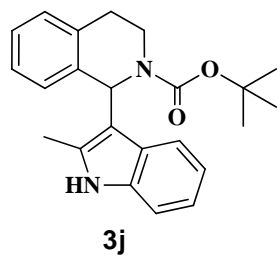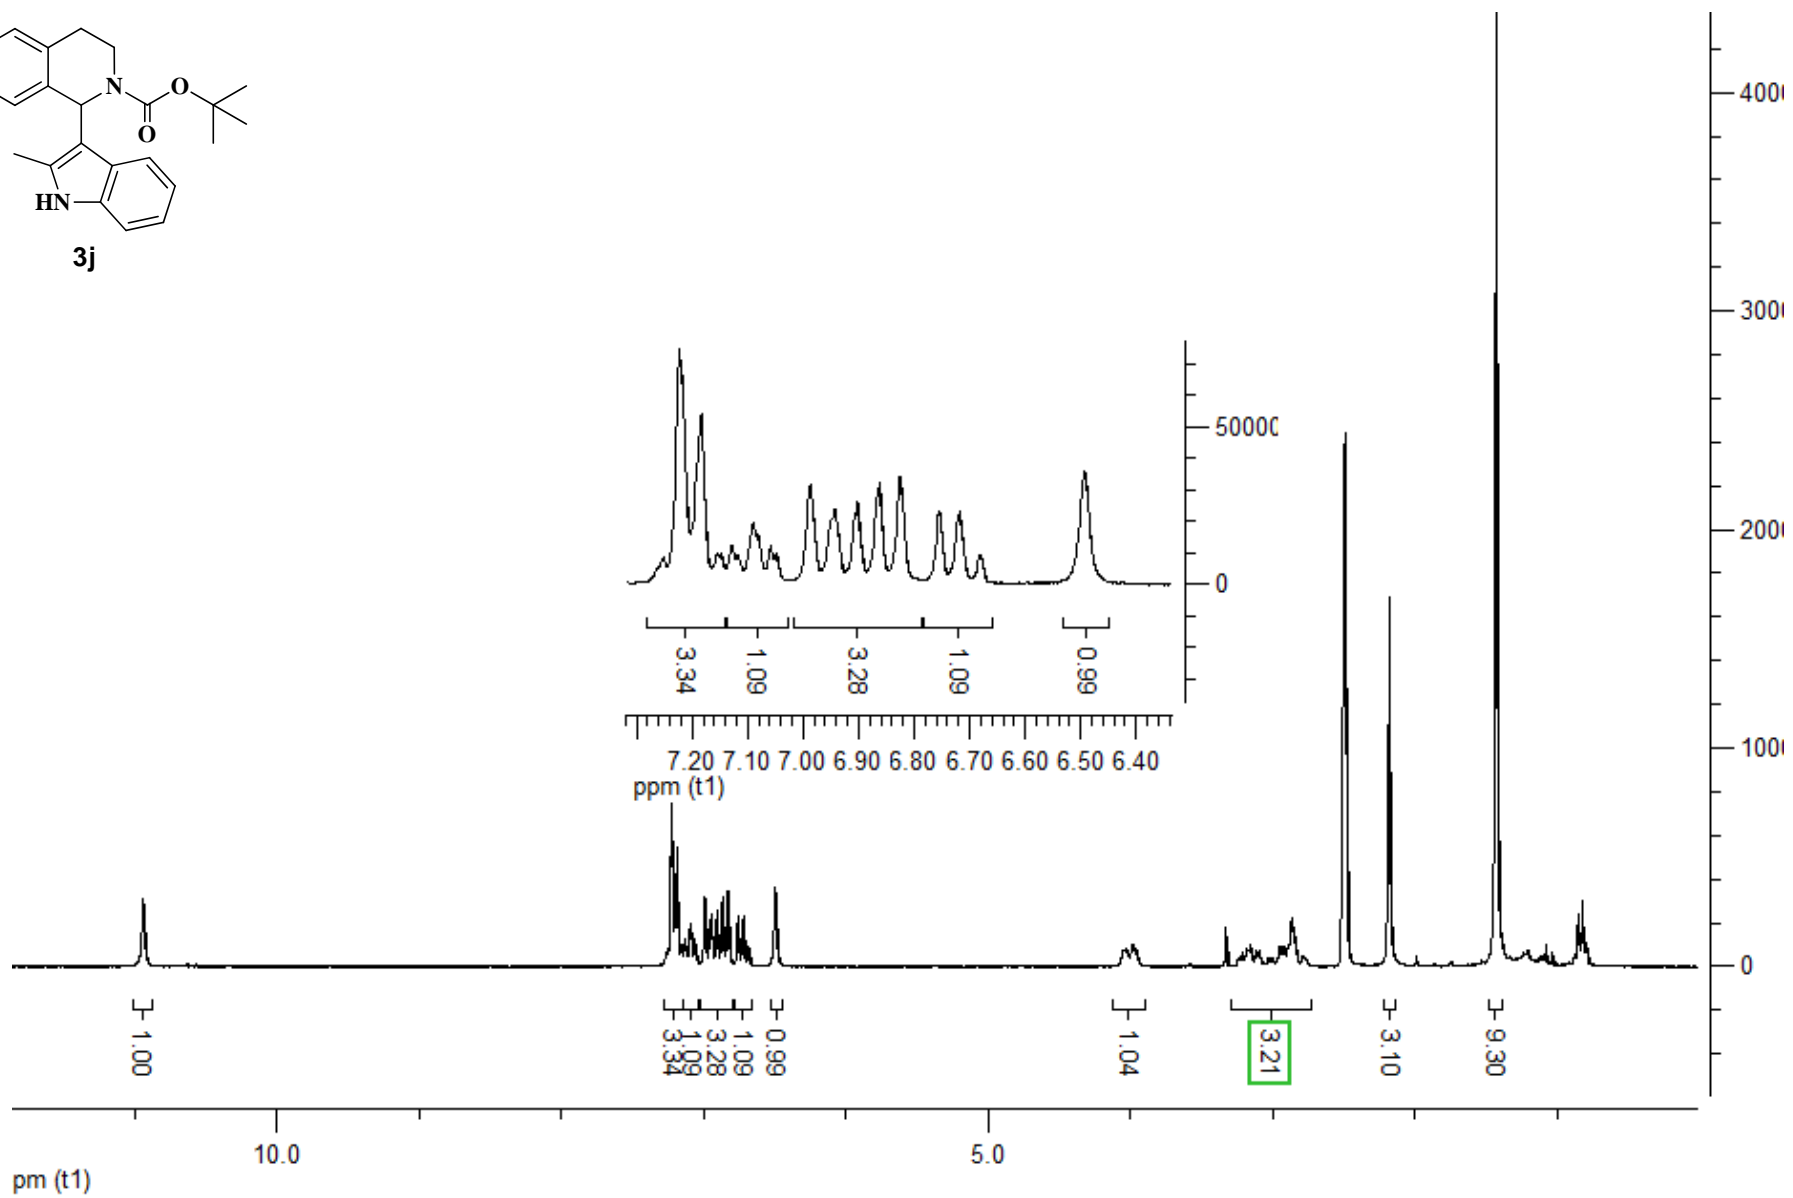

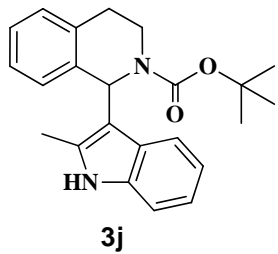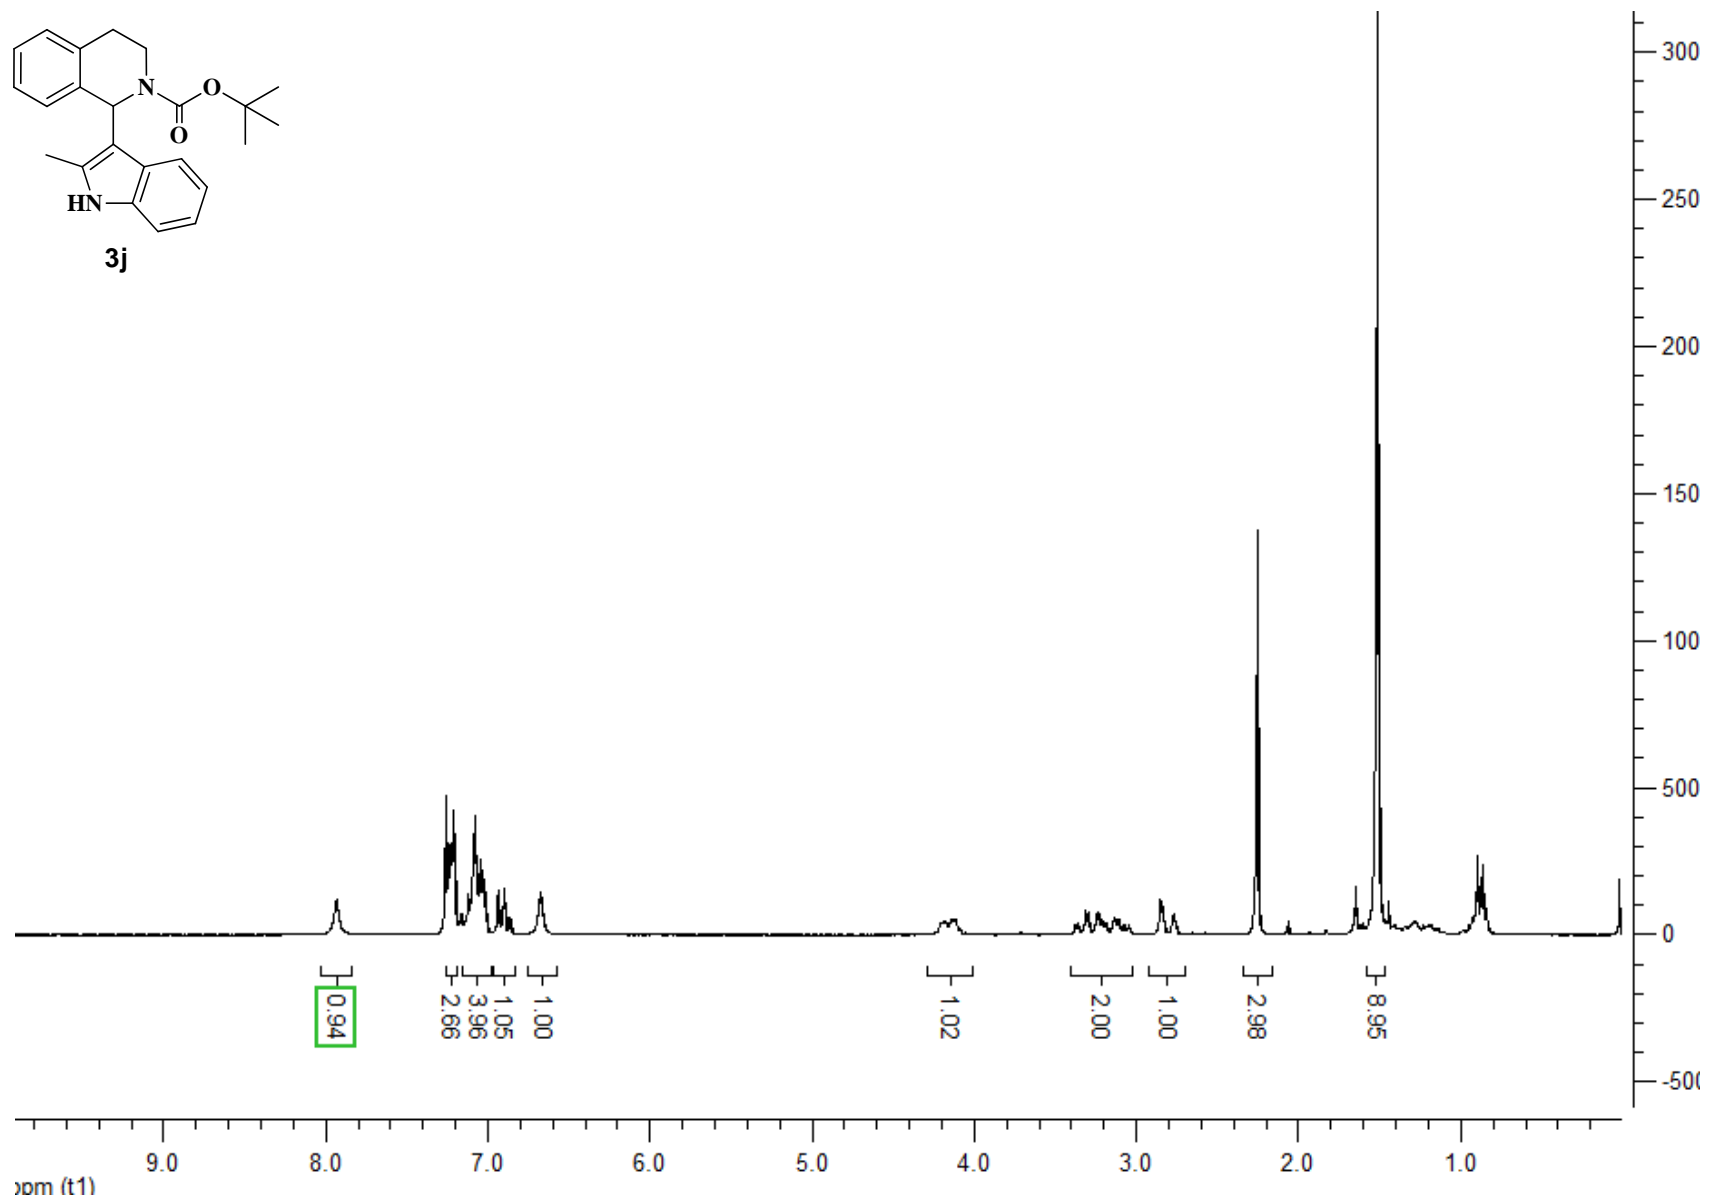

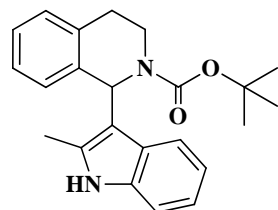

3j

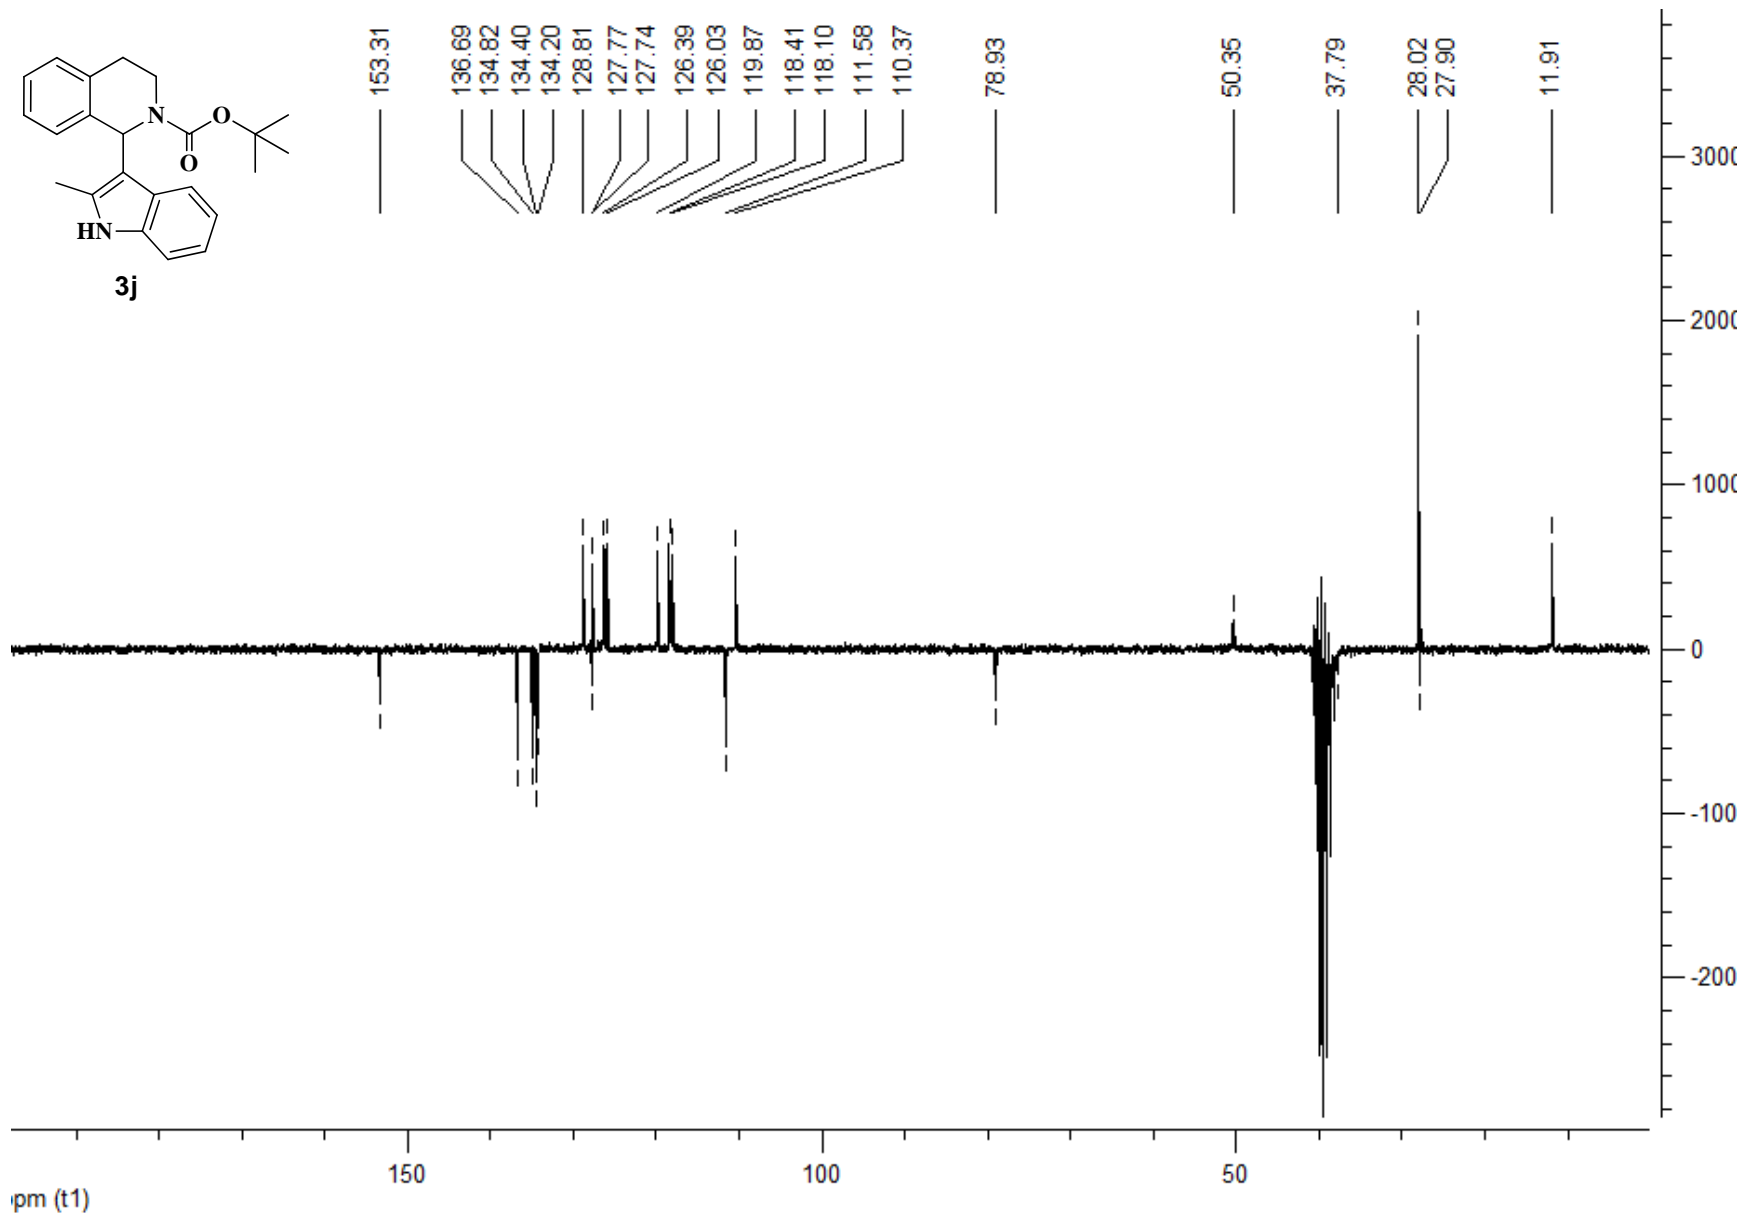

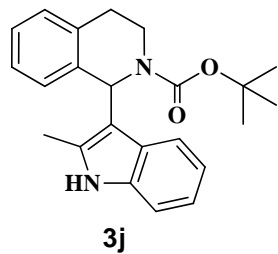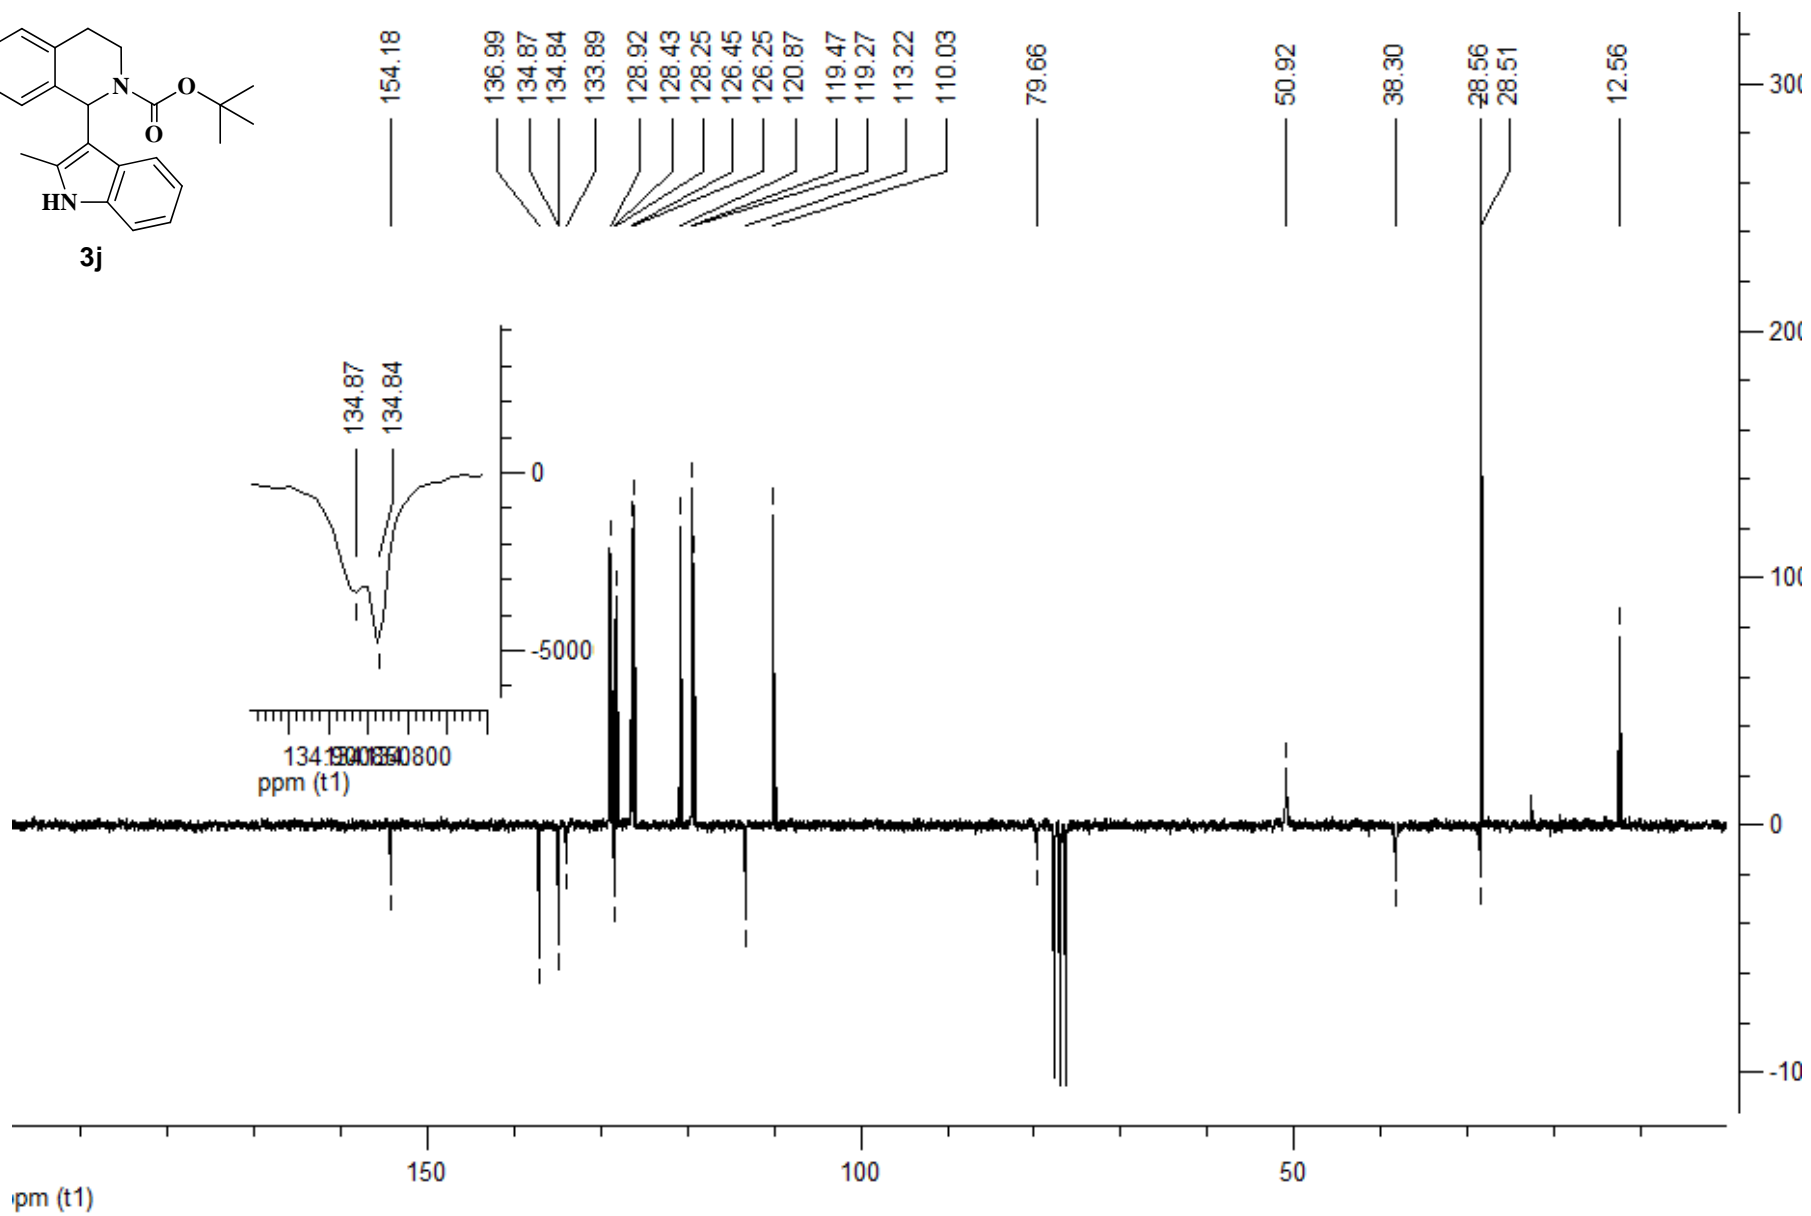



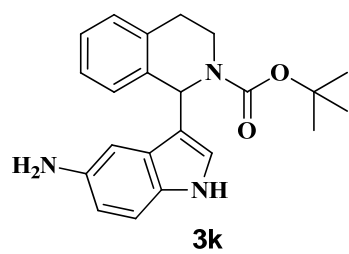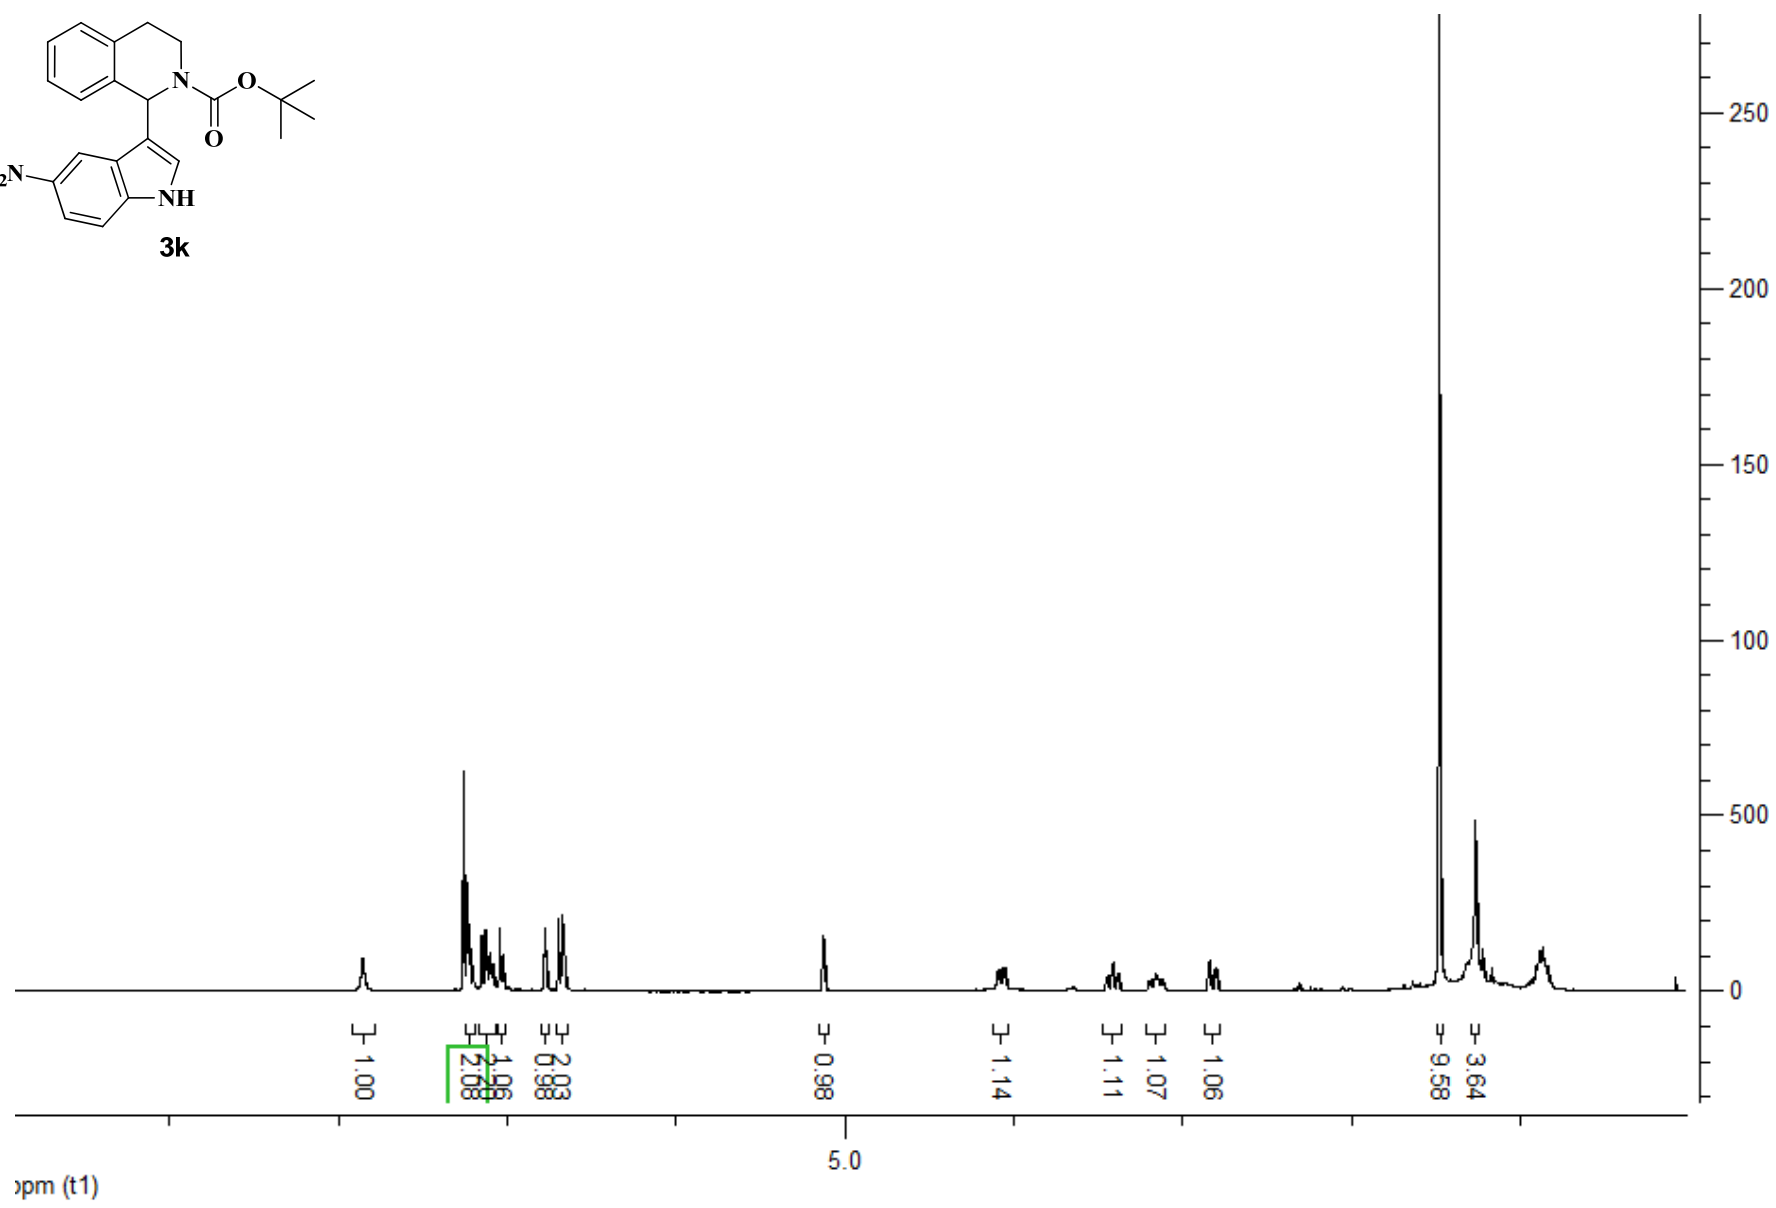

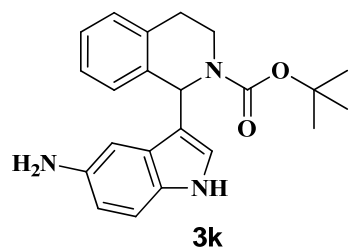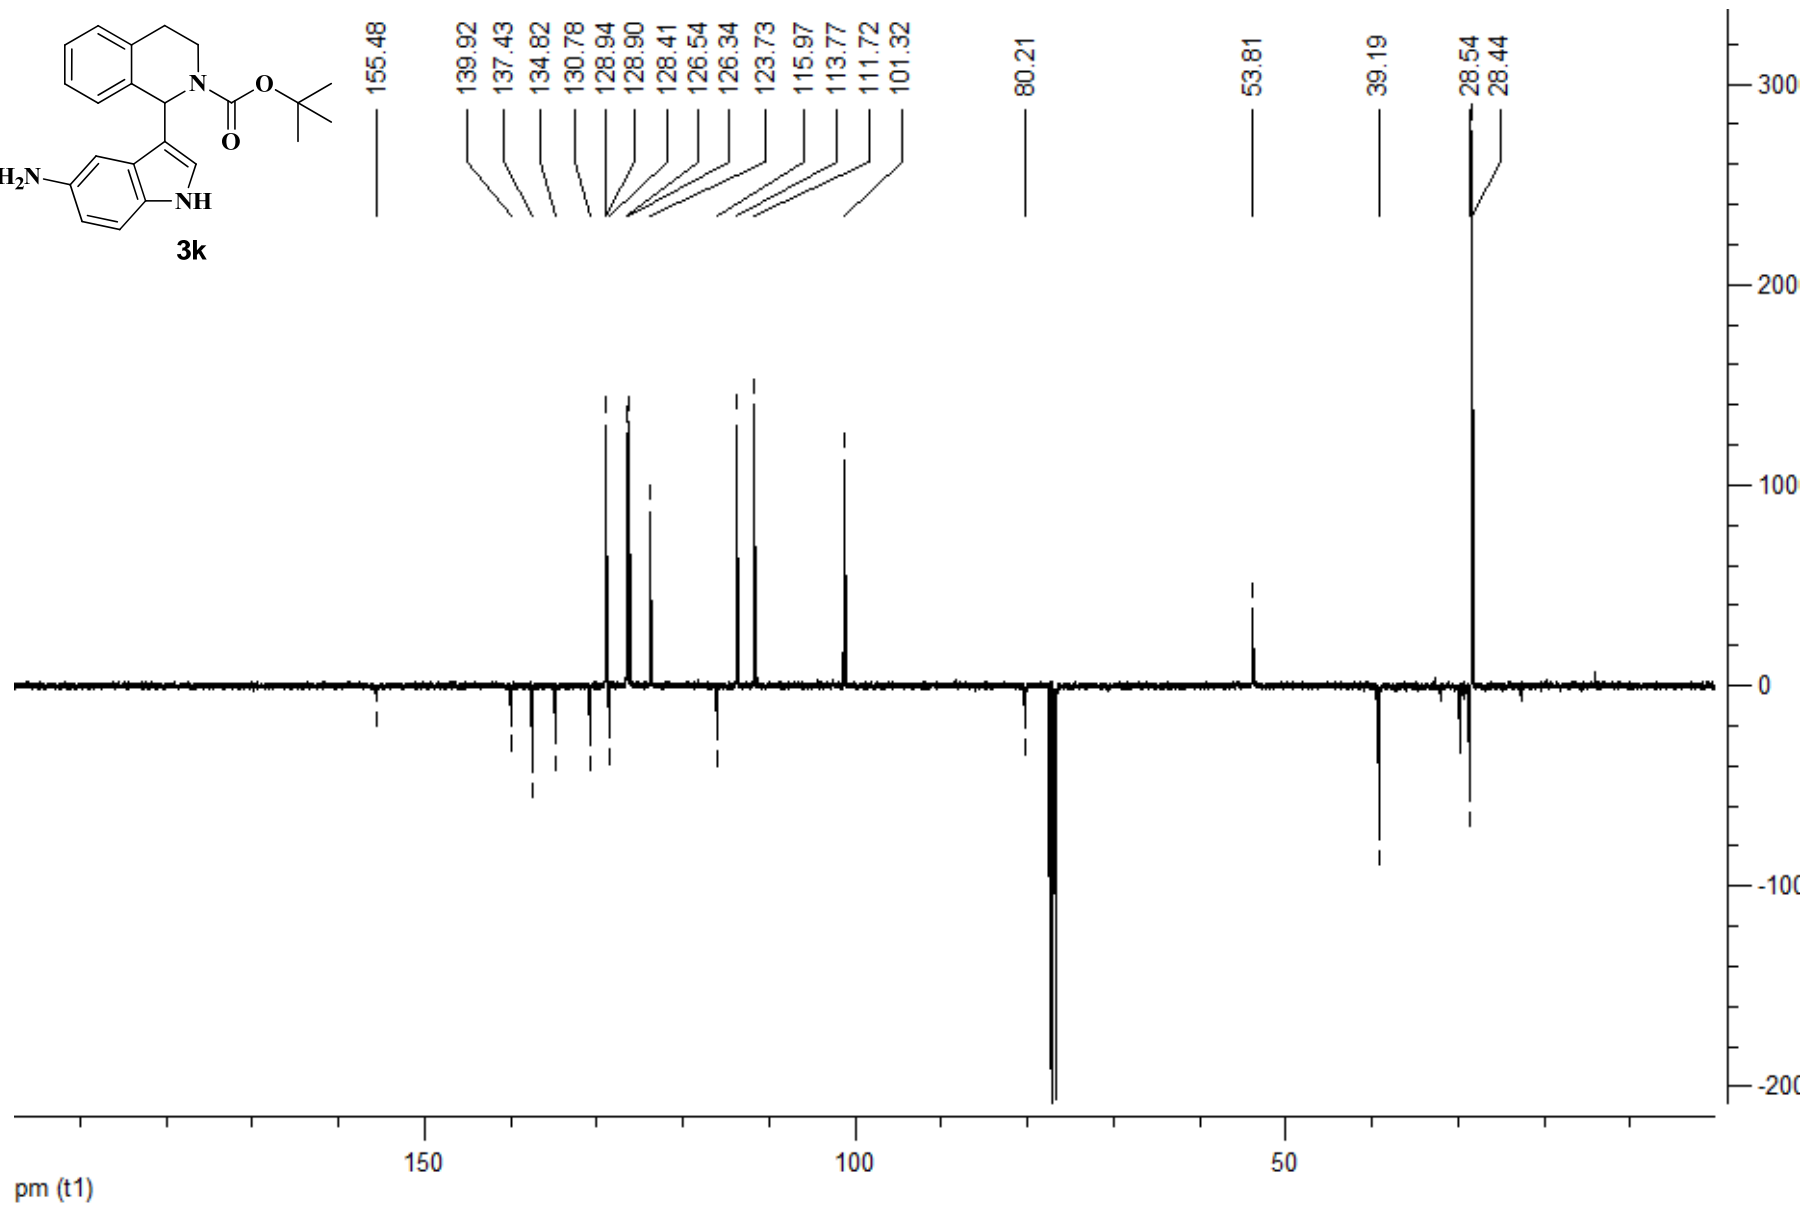

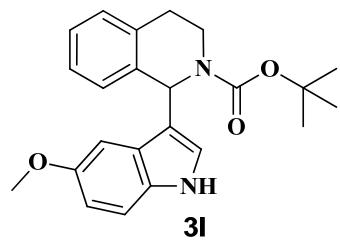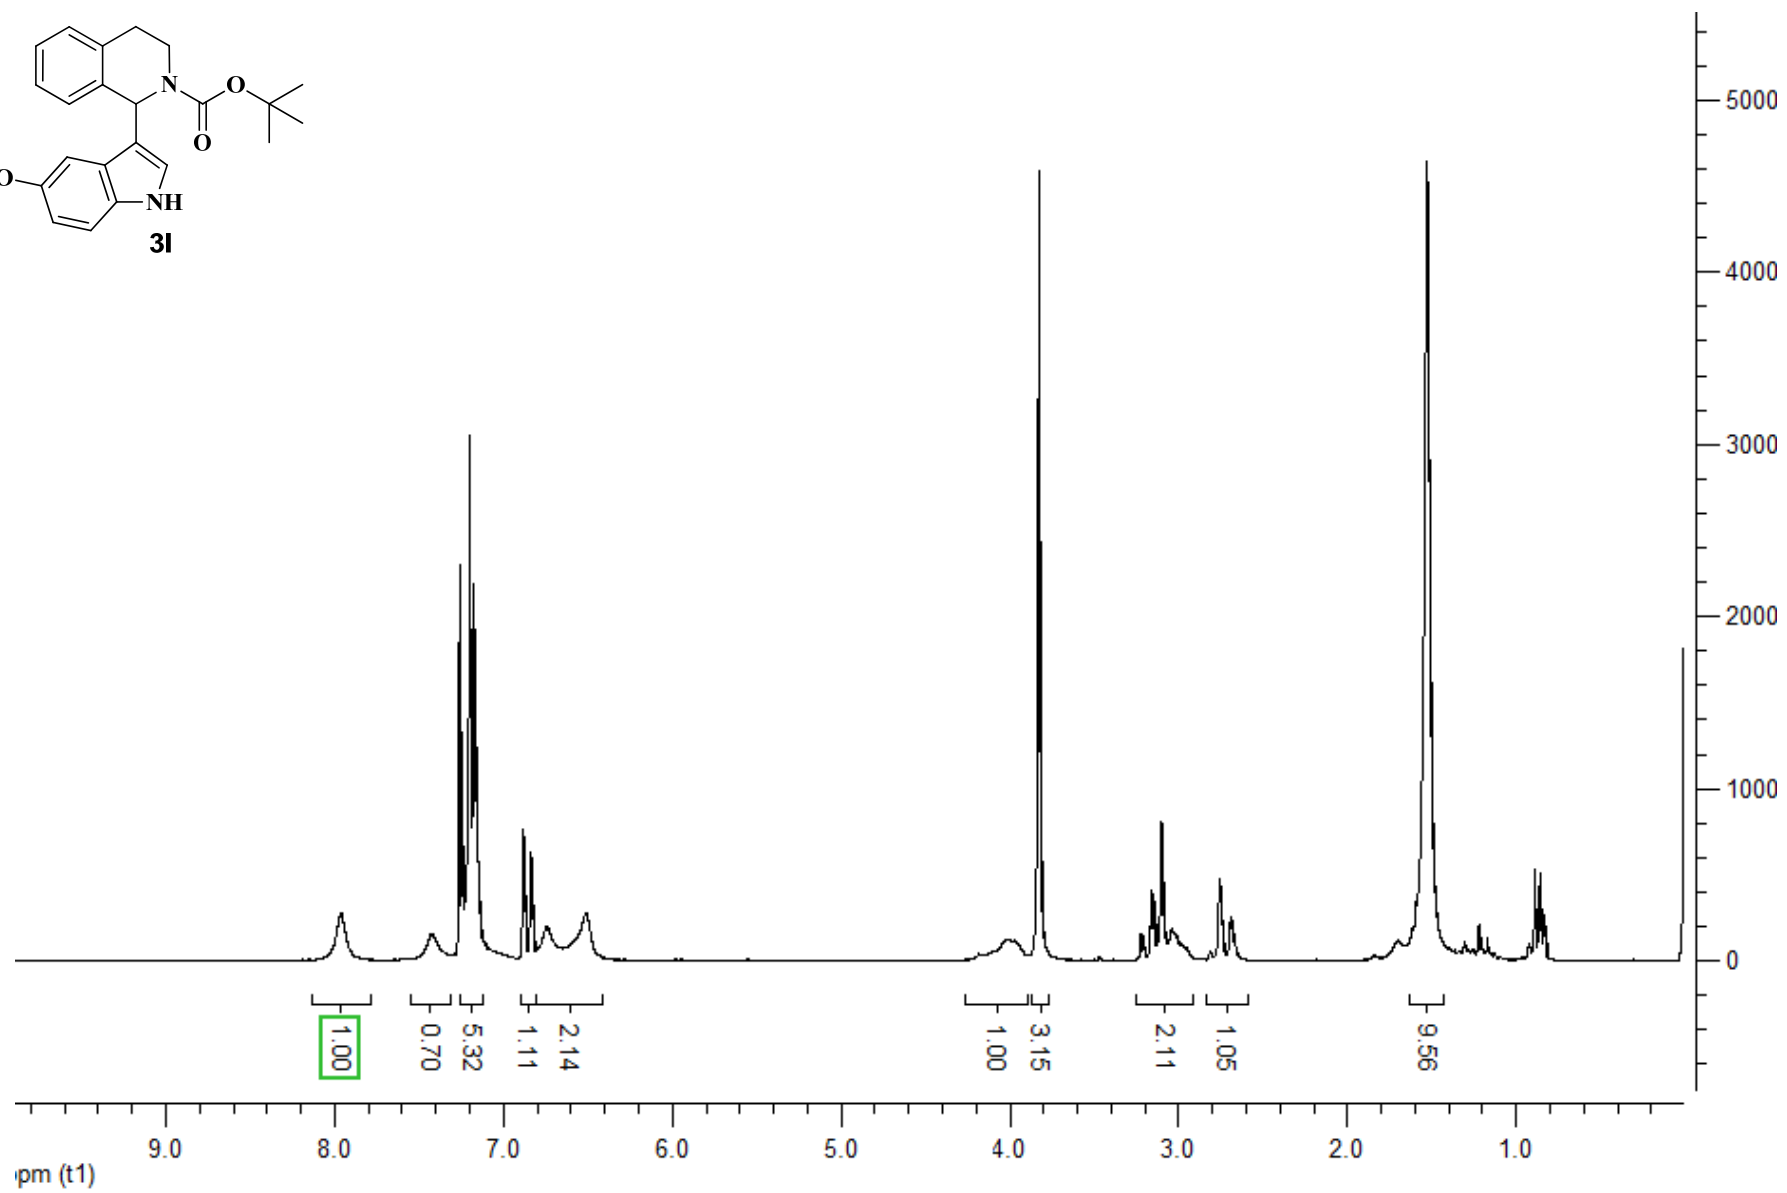

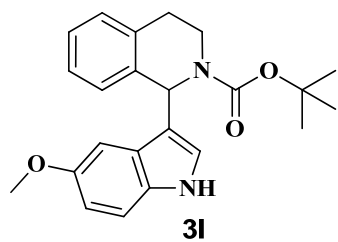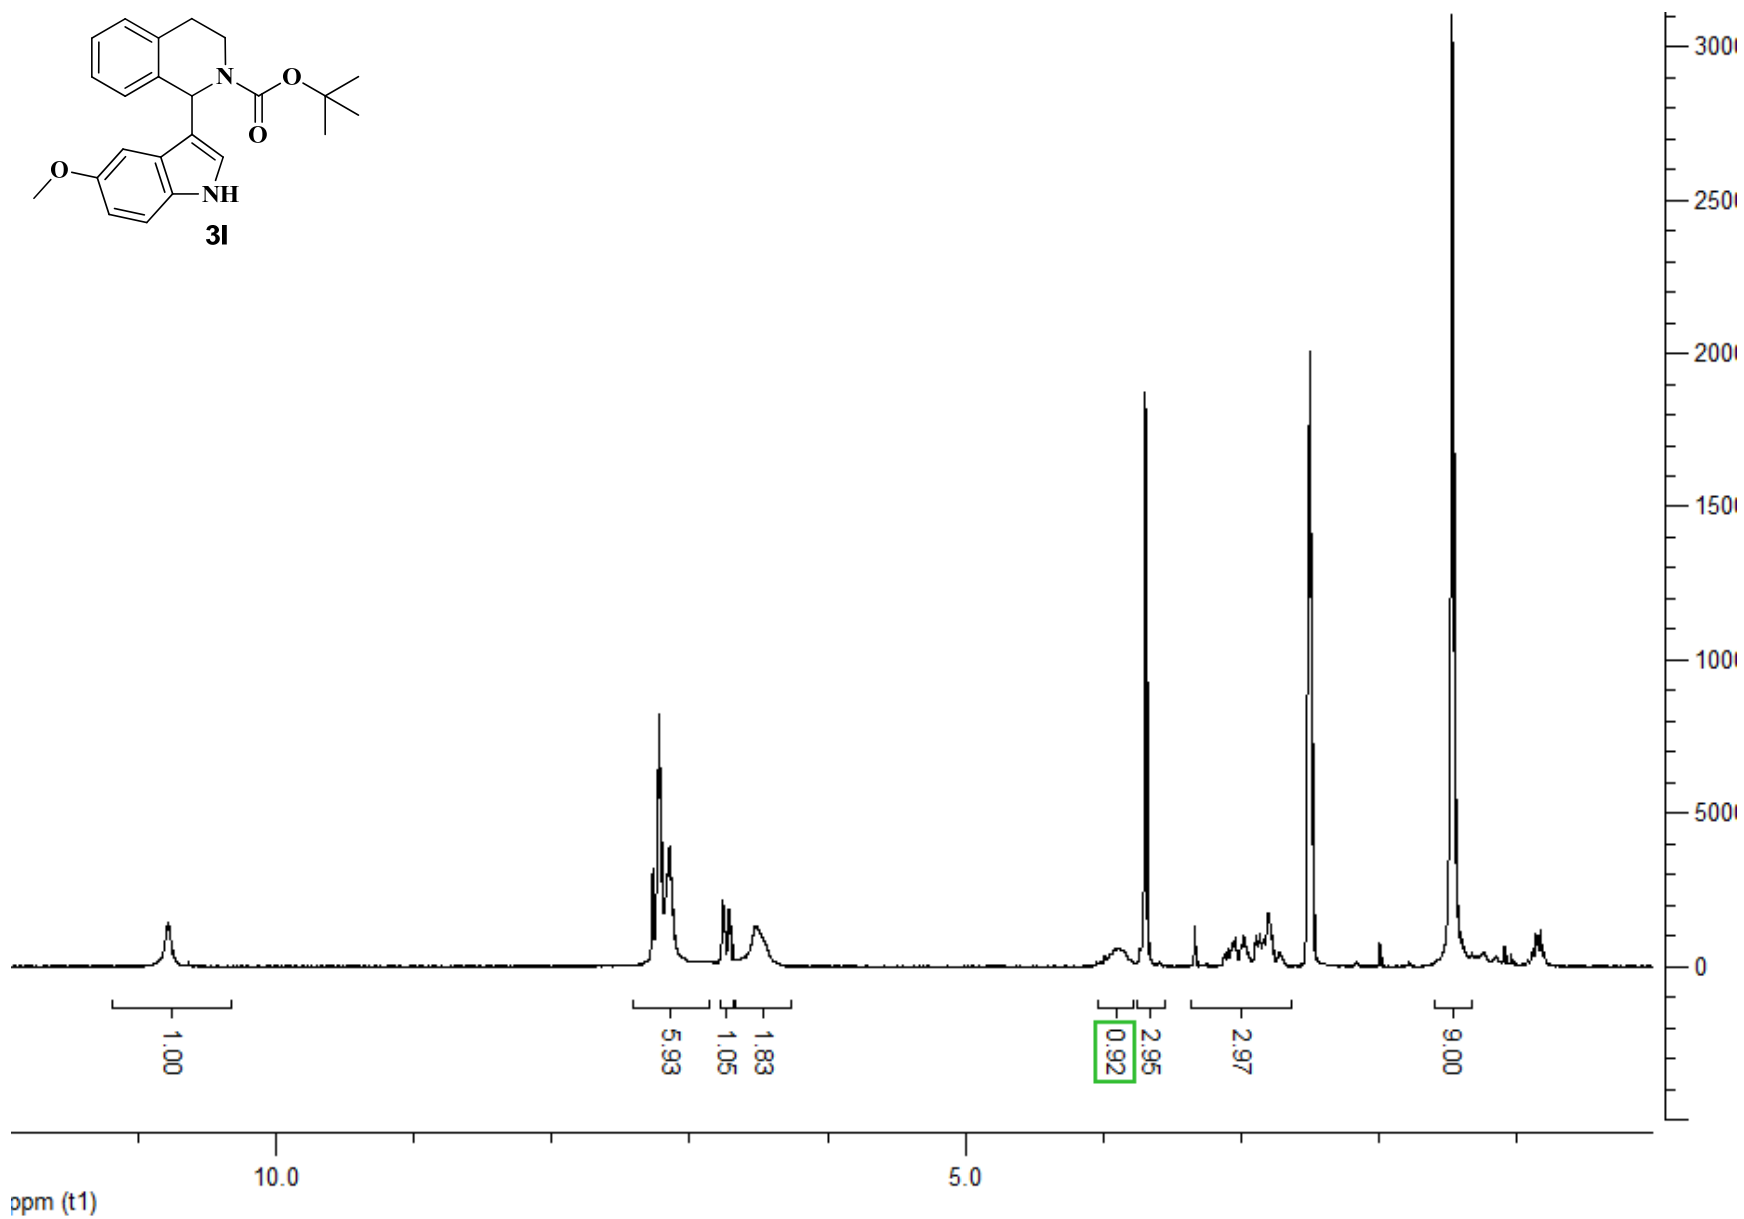

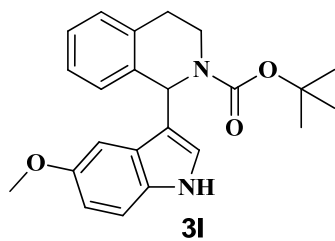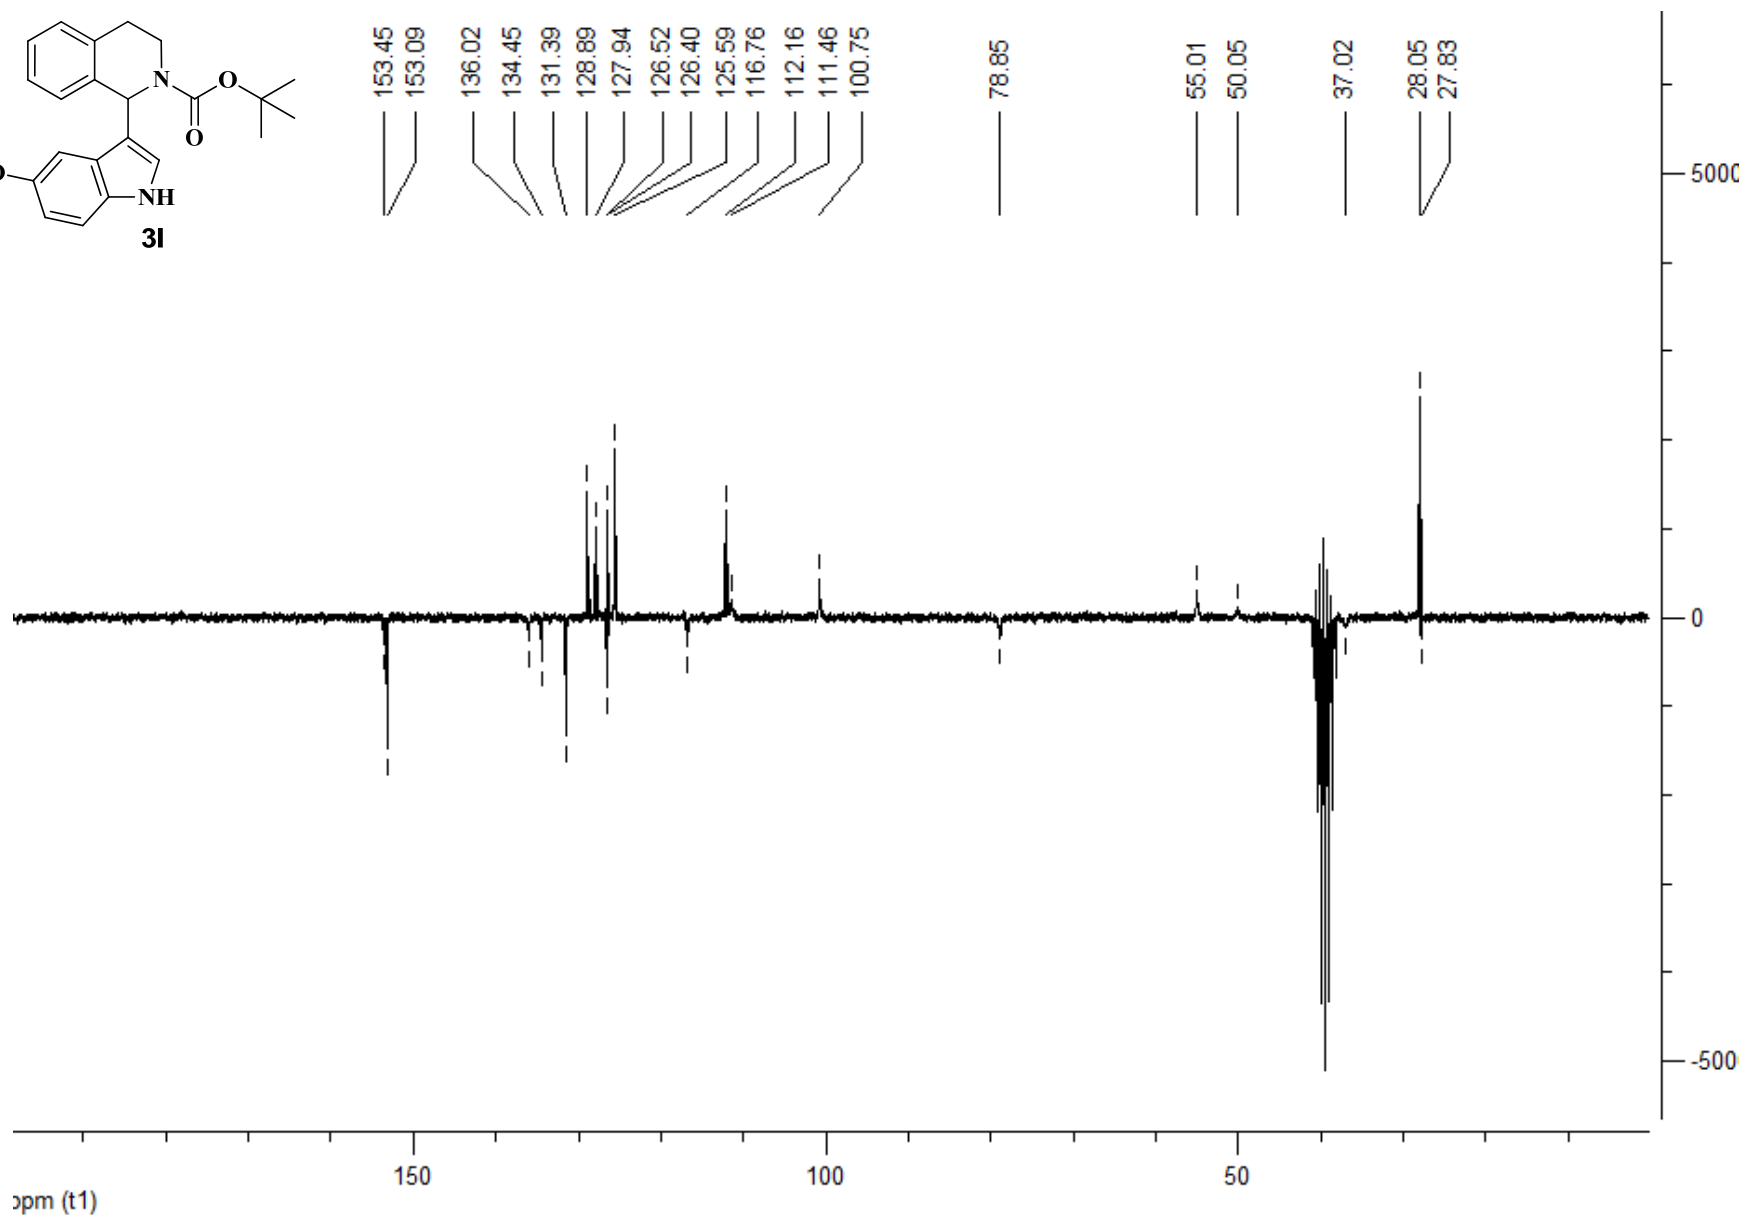

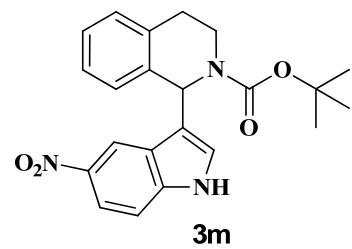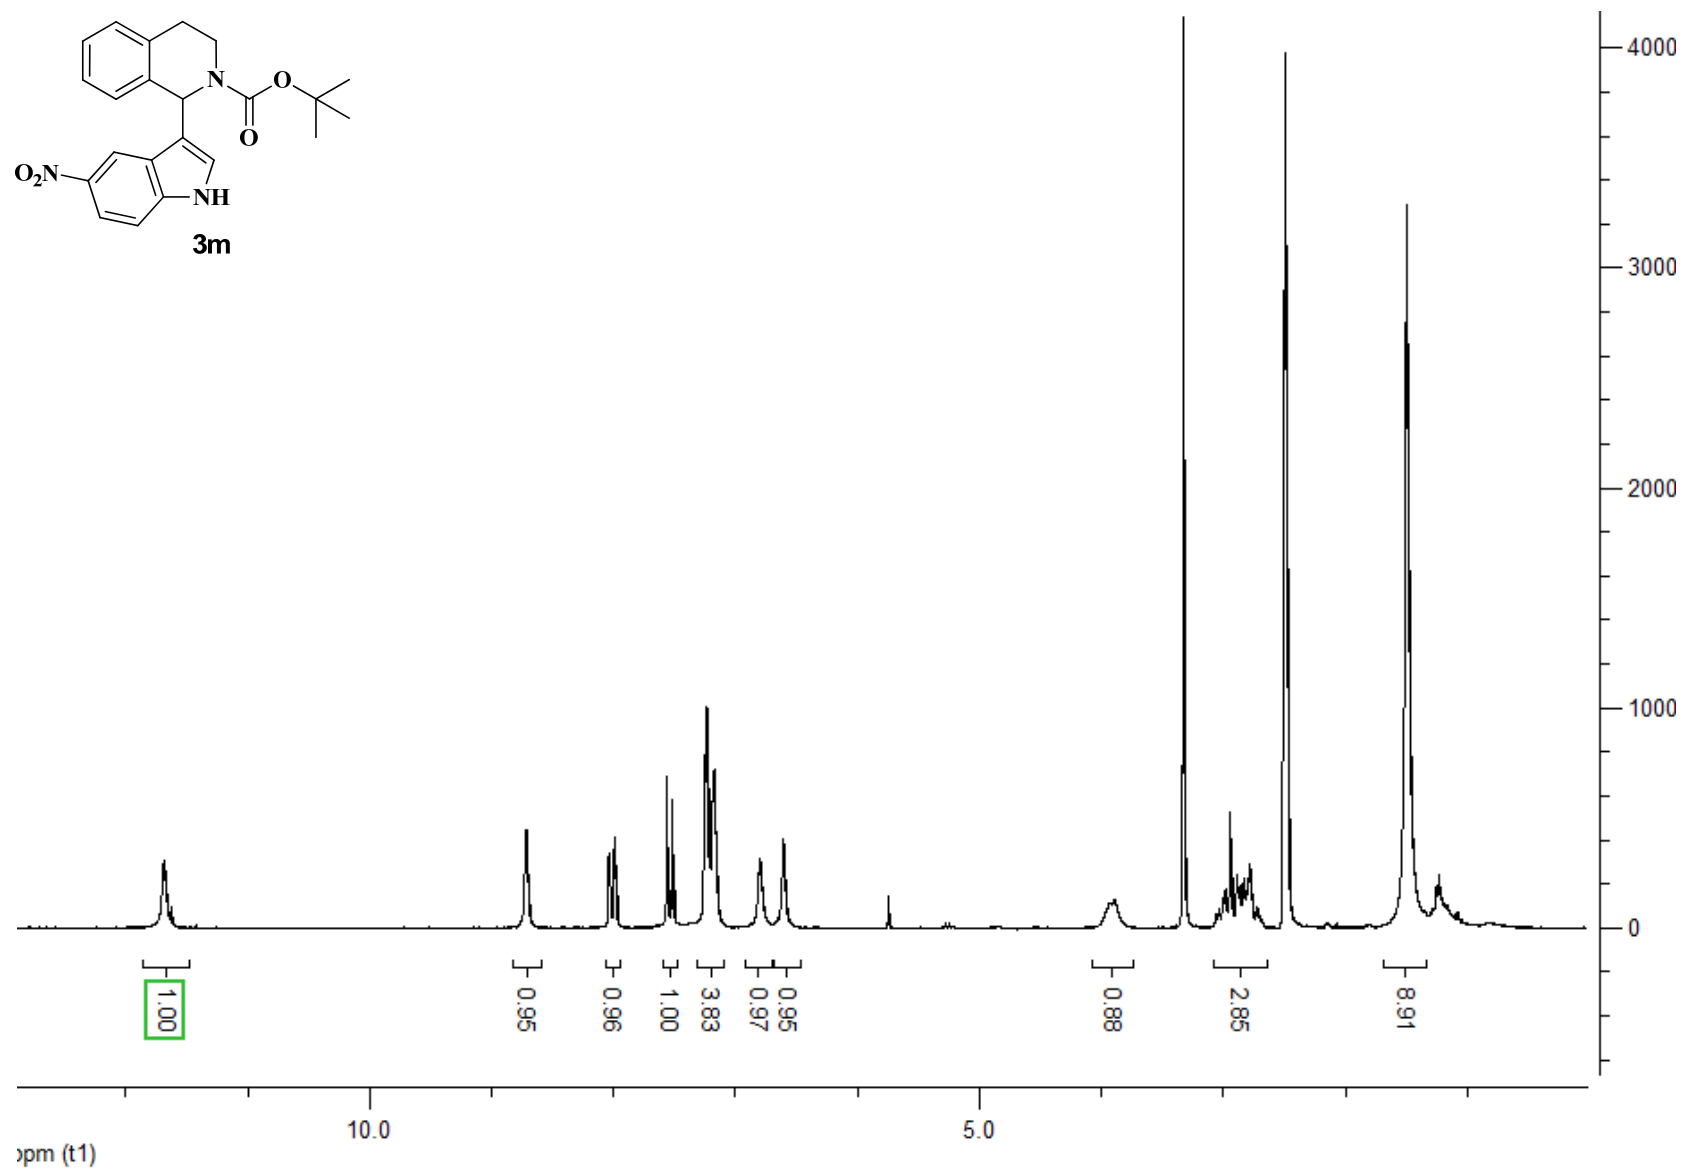

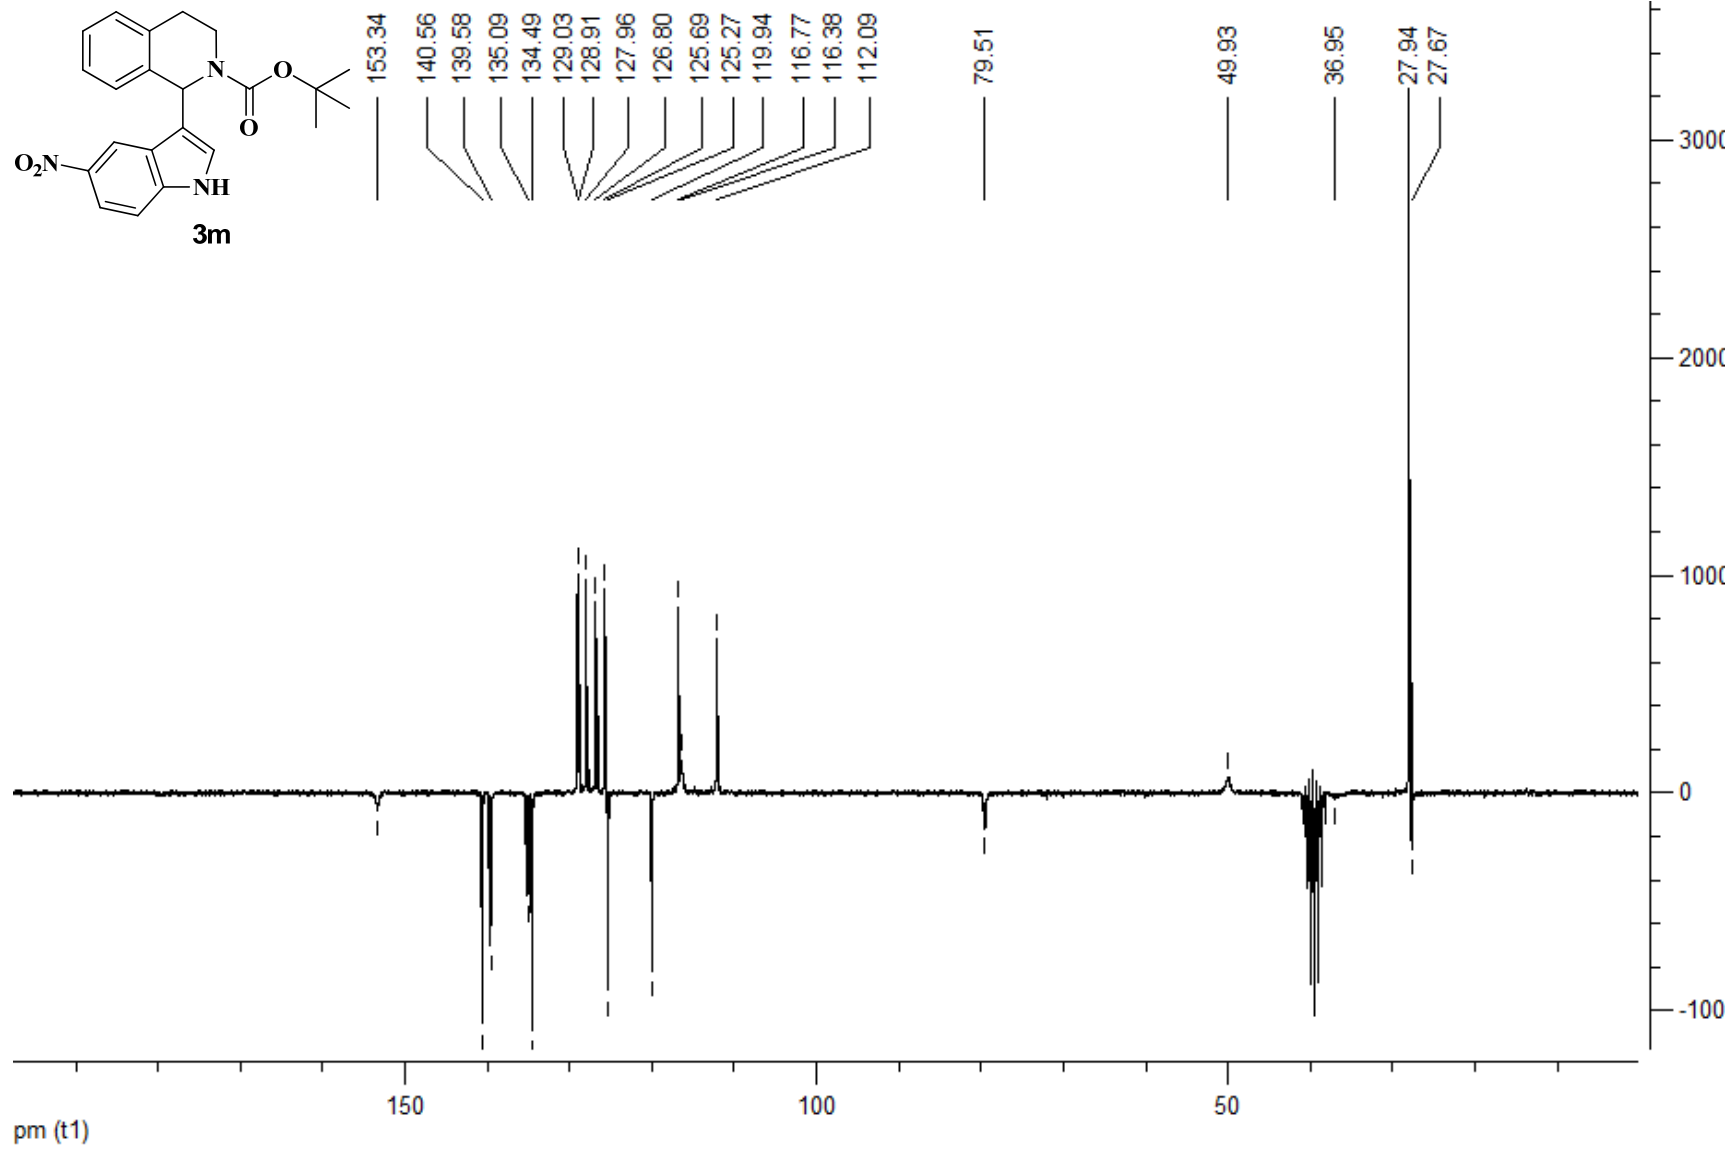

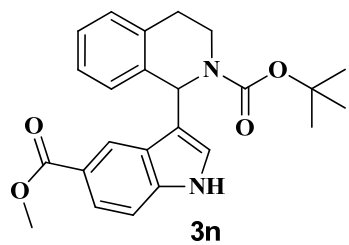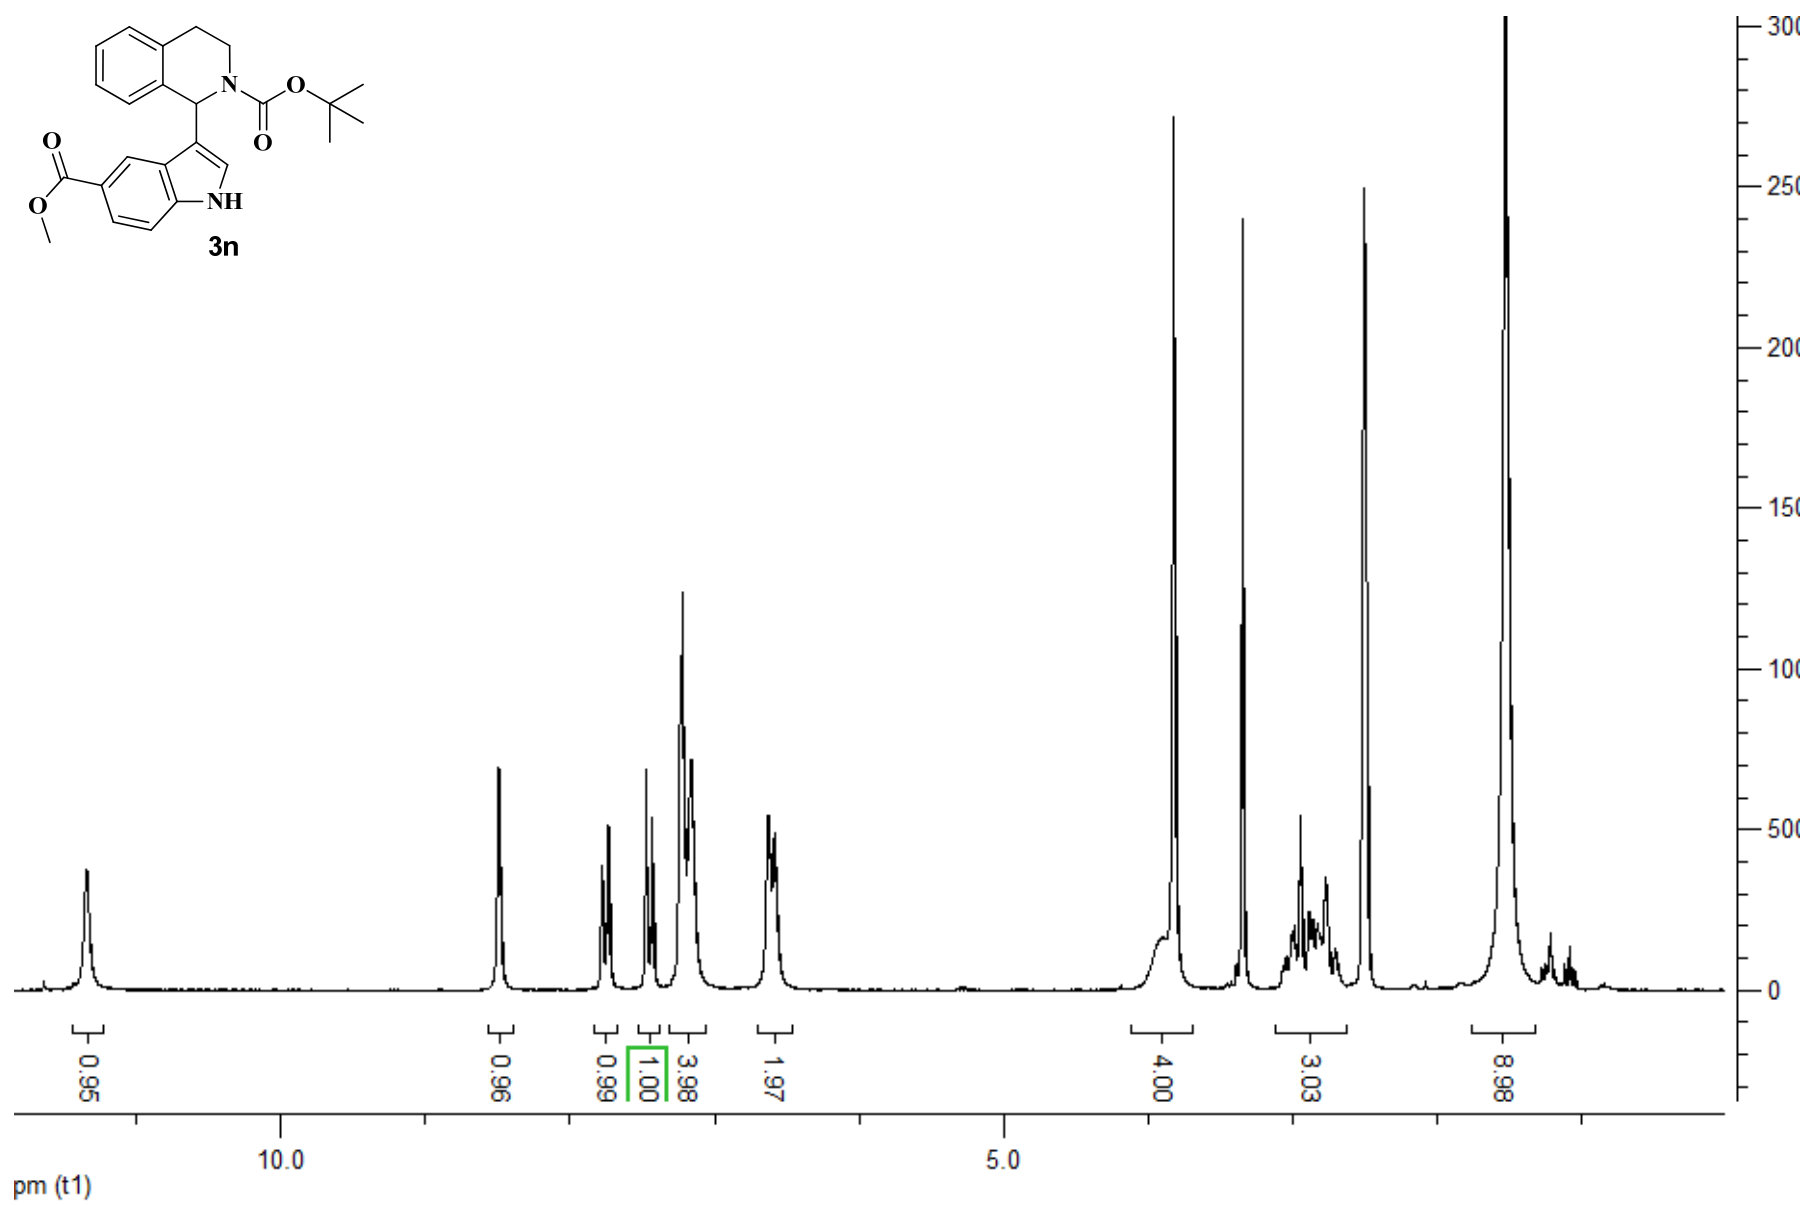



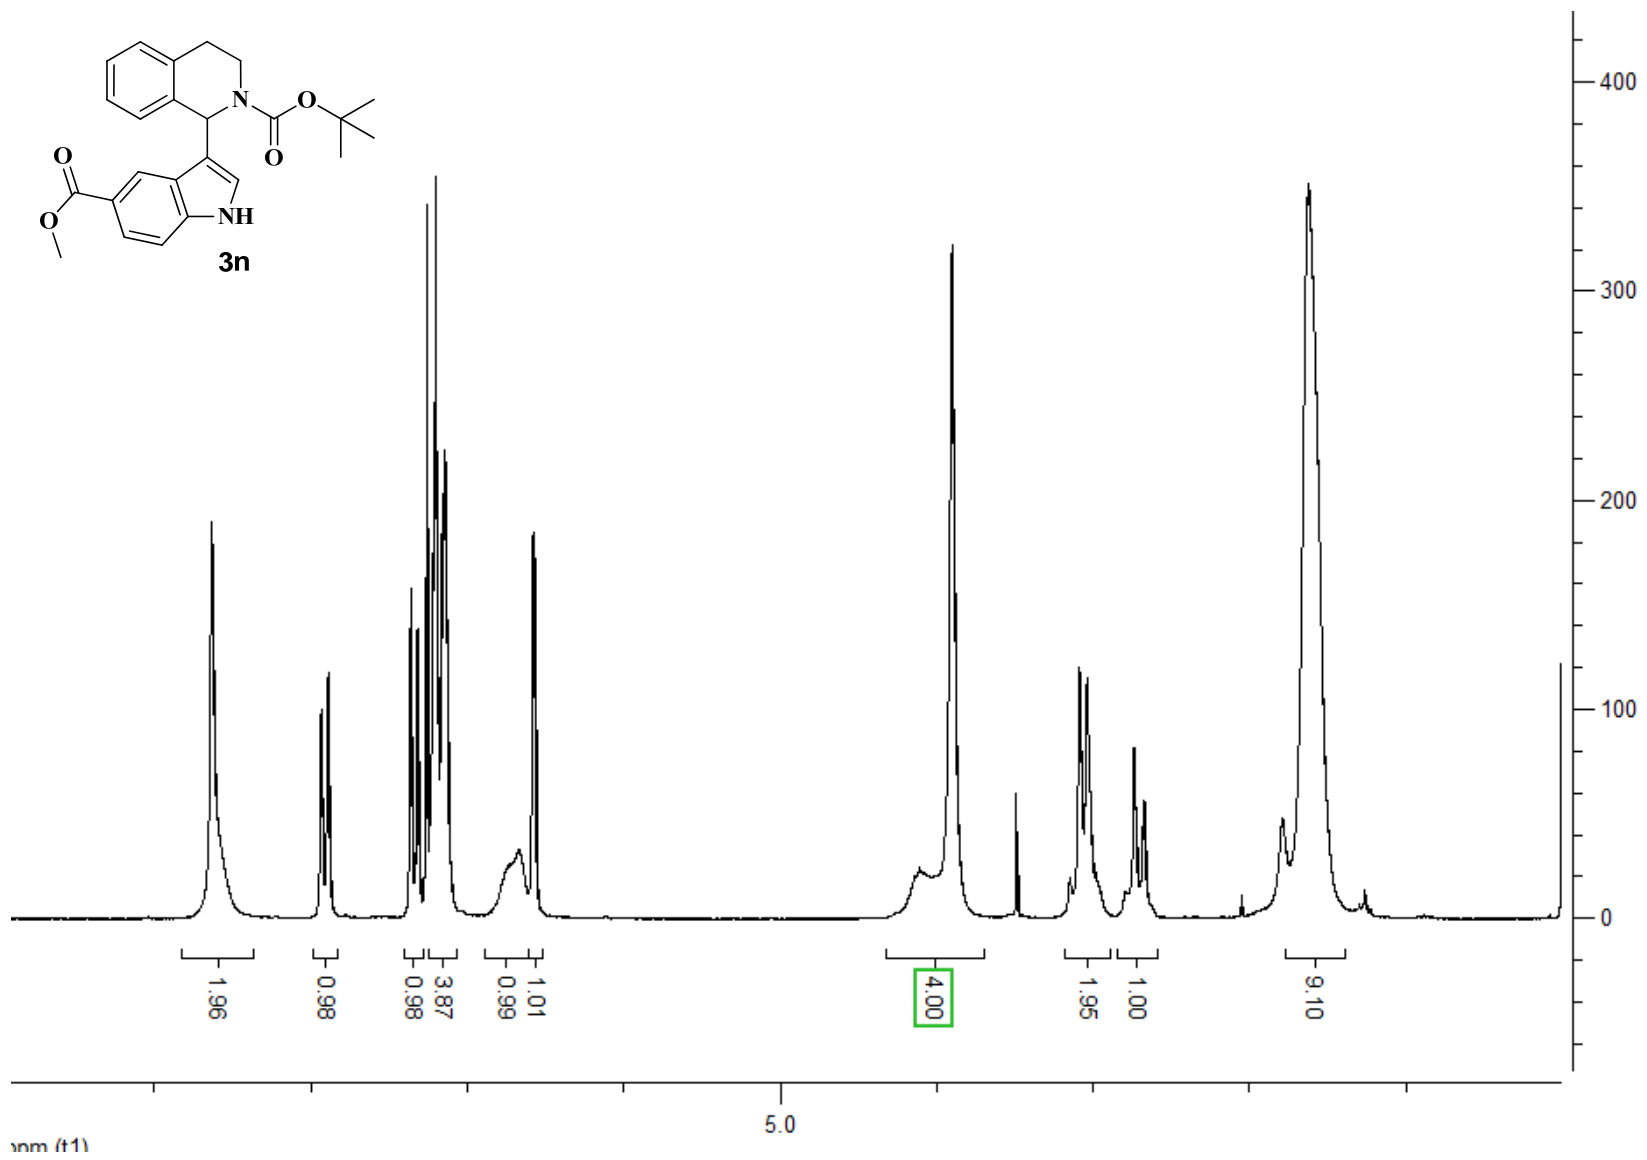

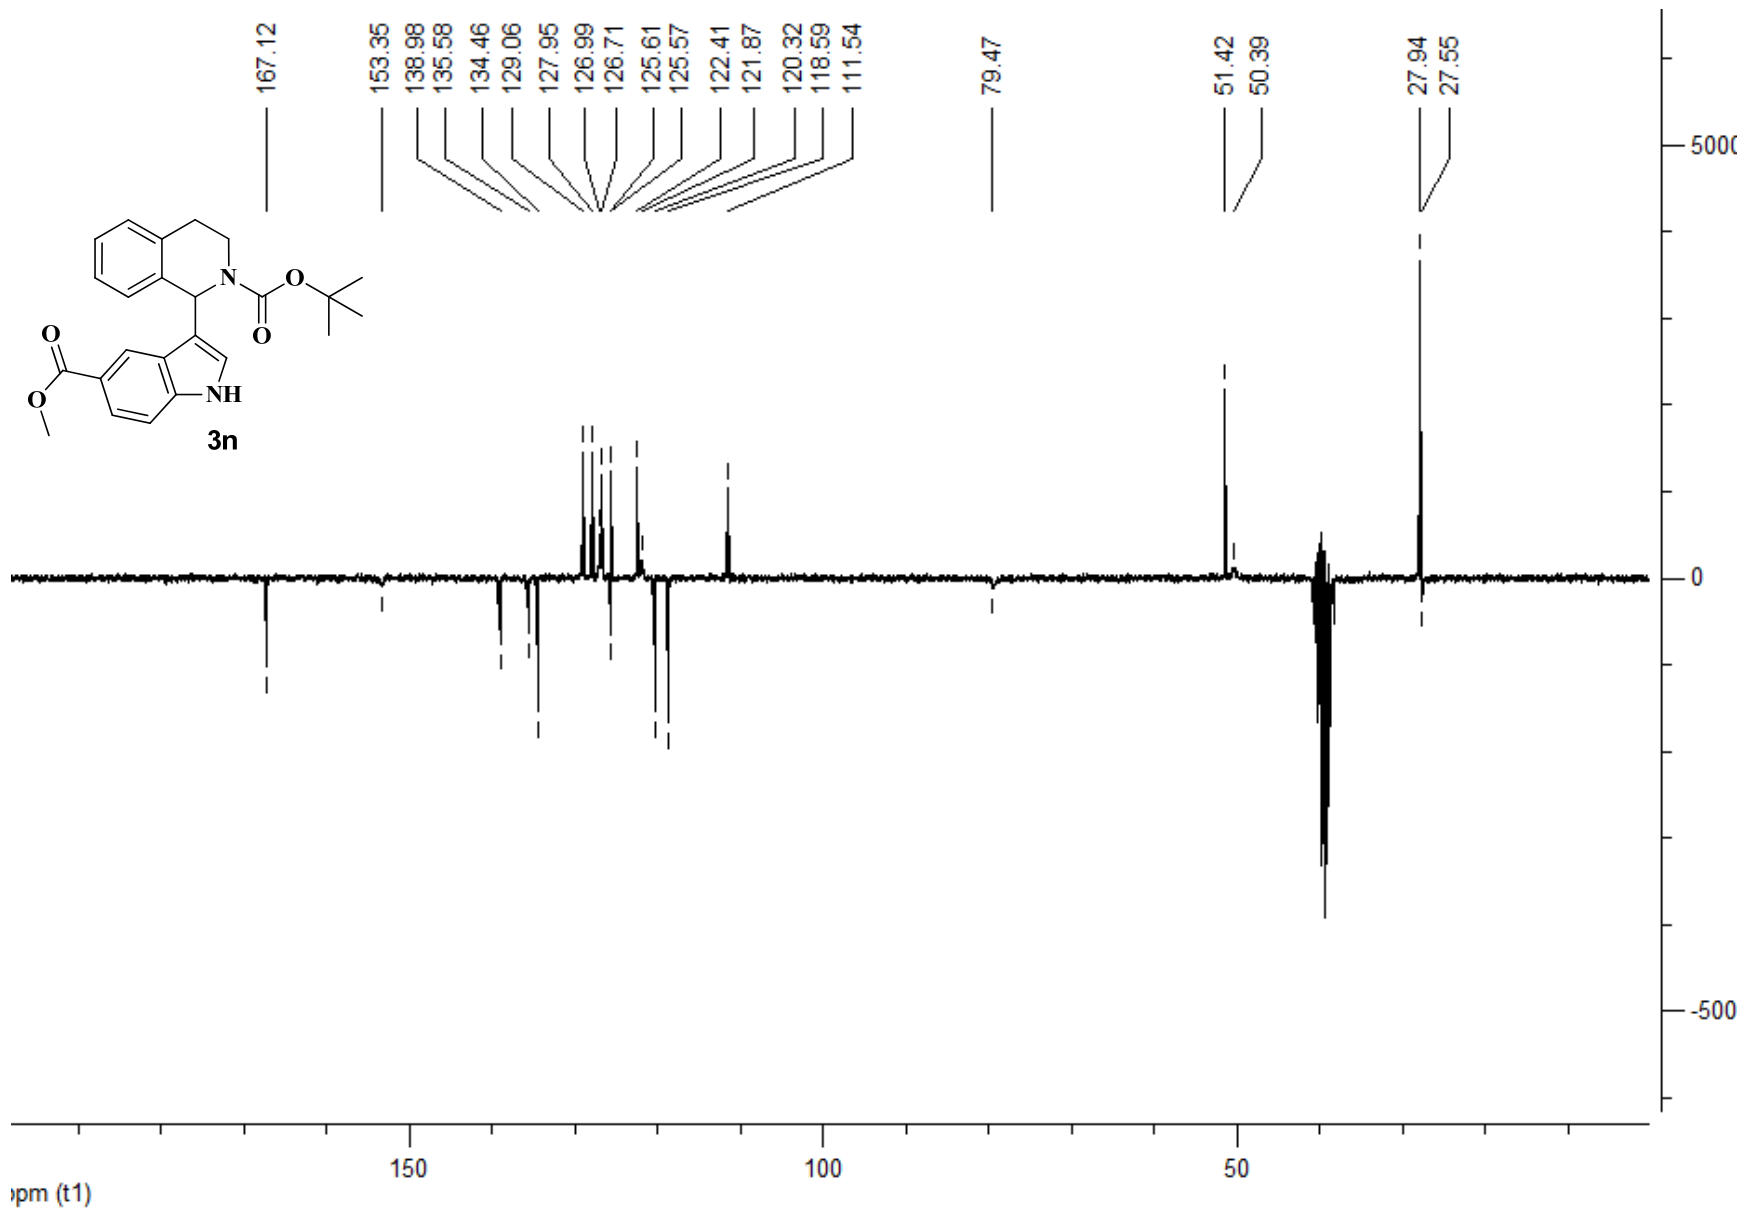

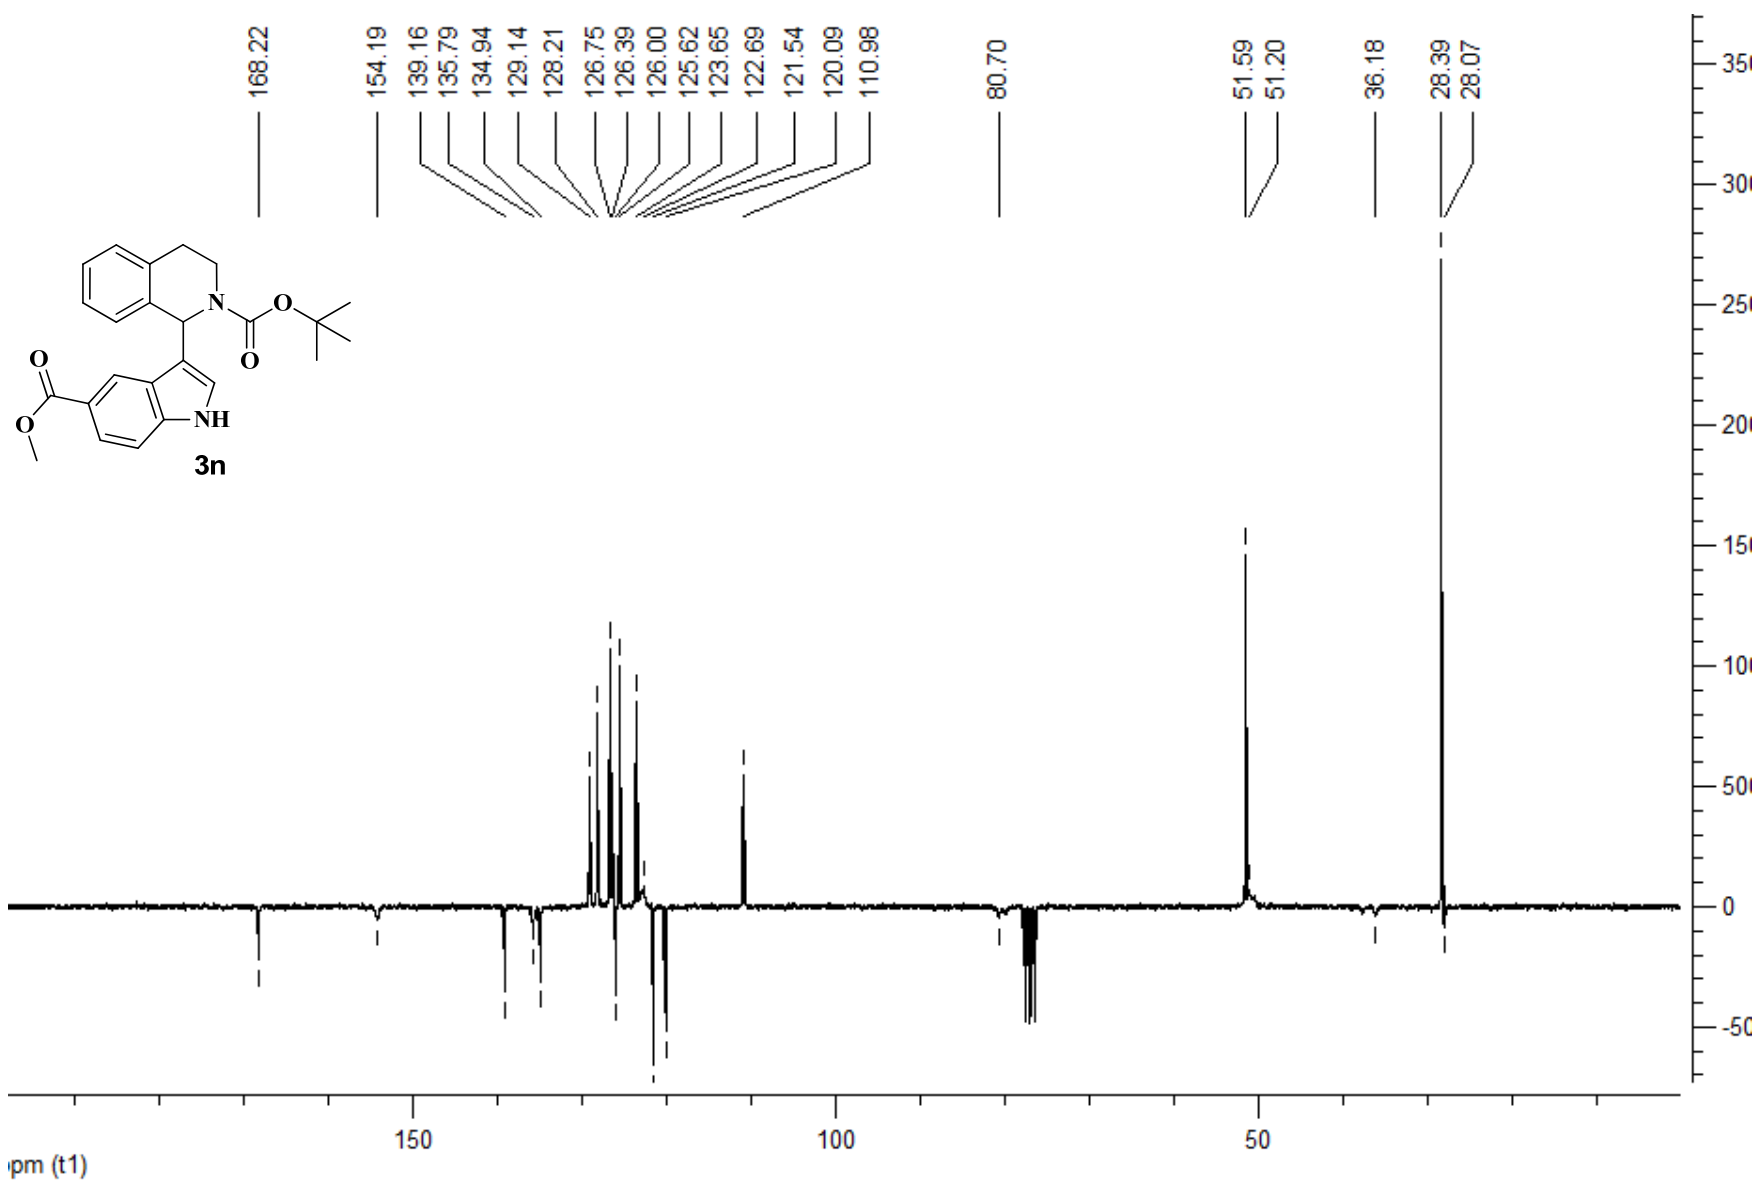

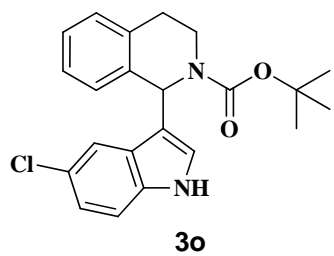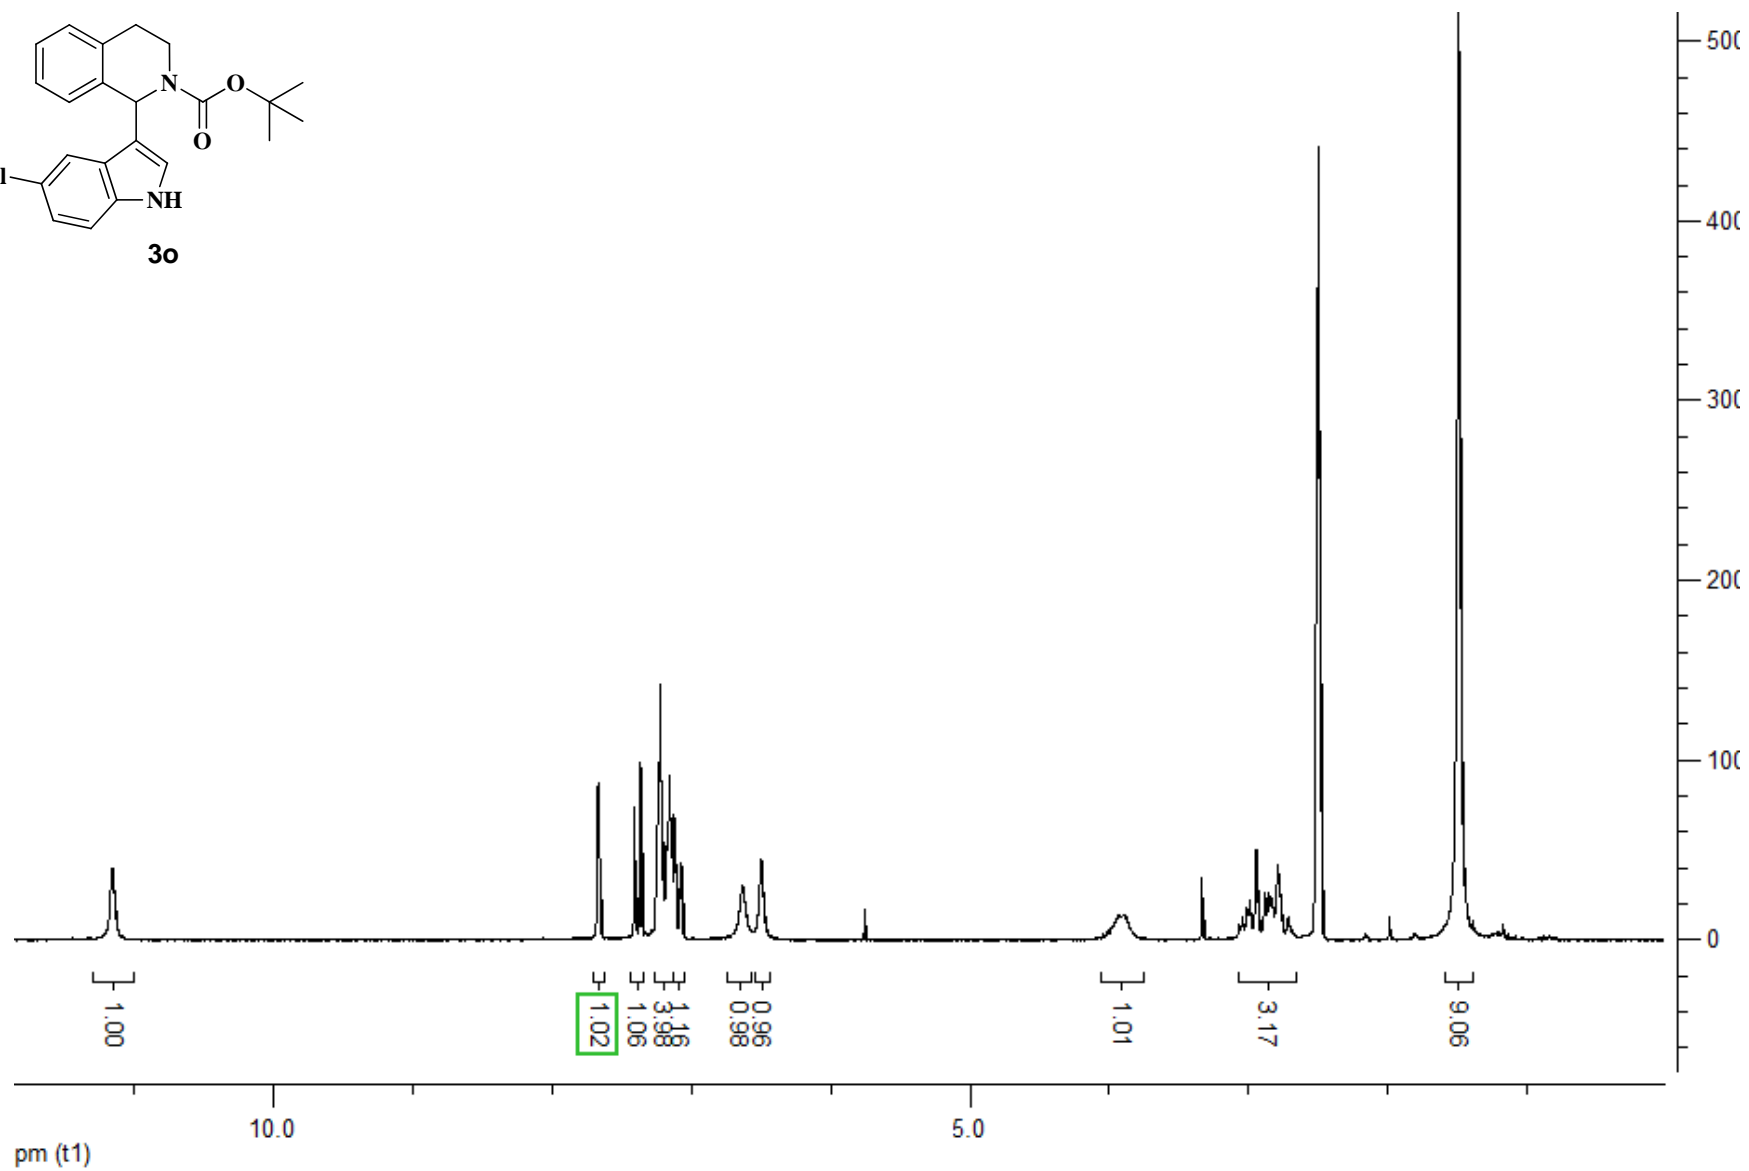

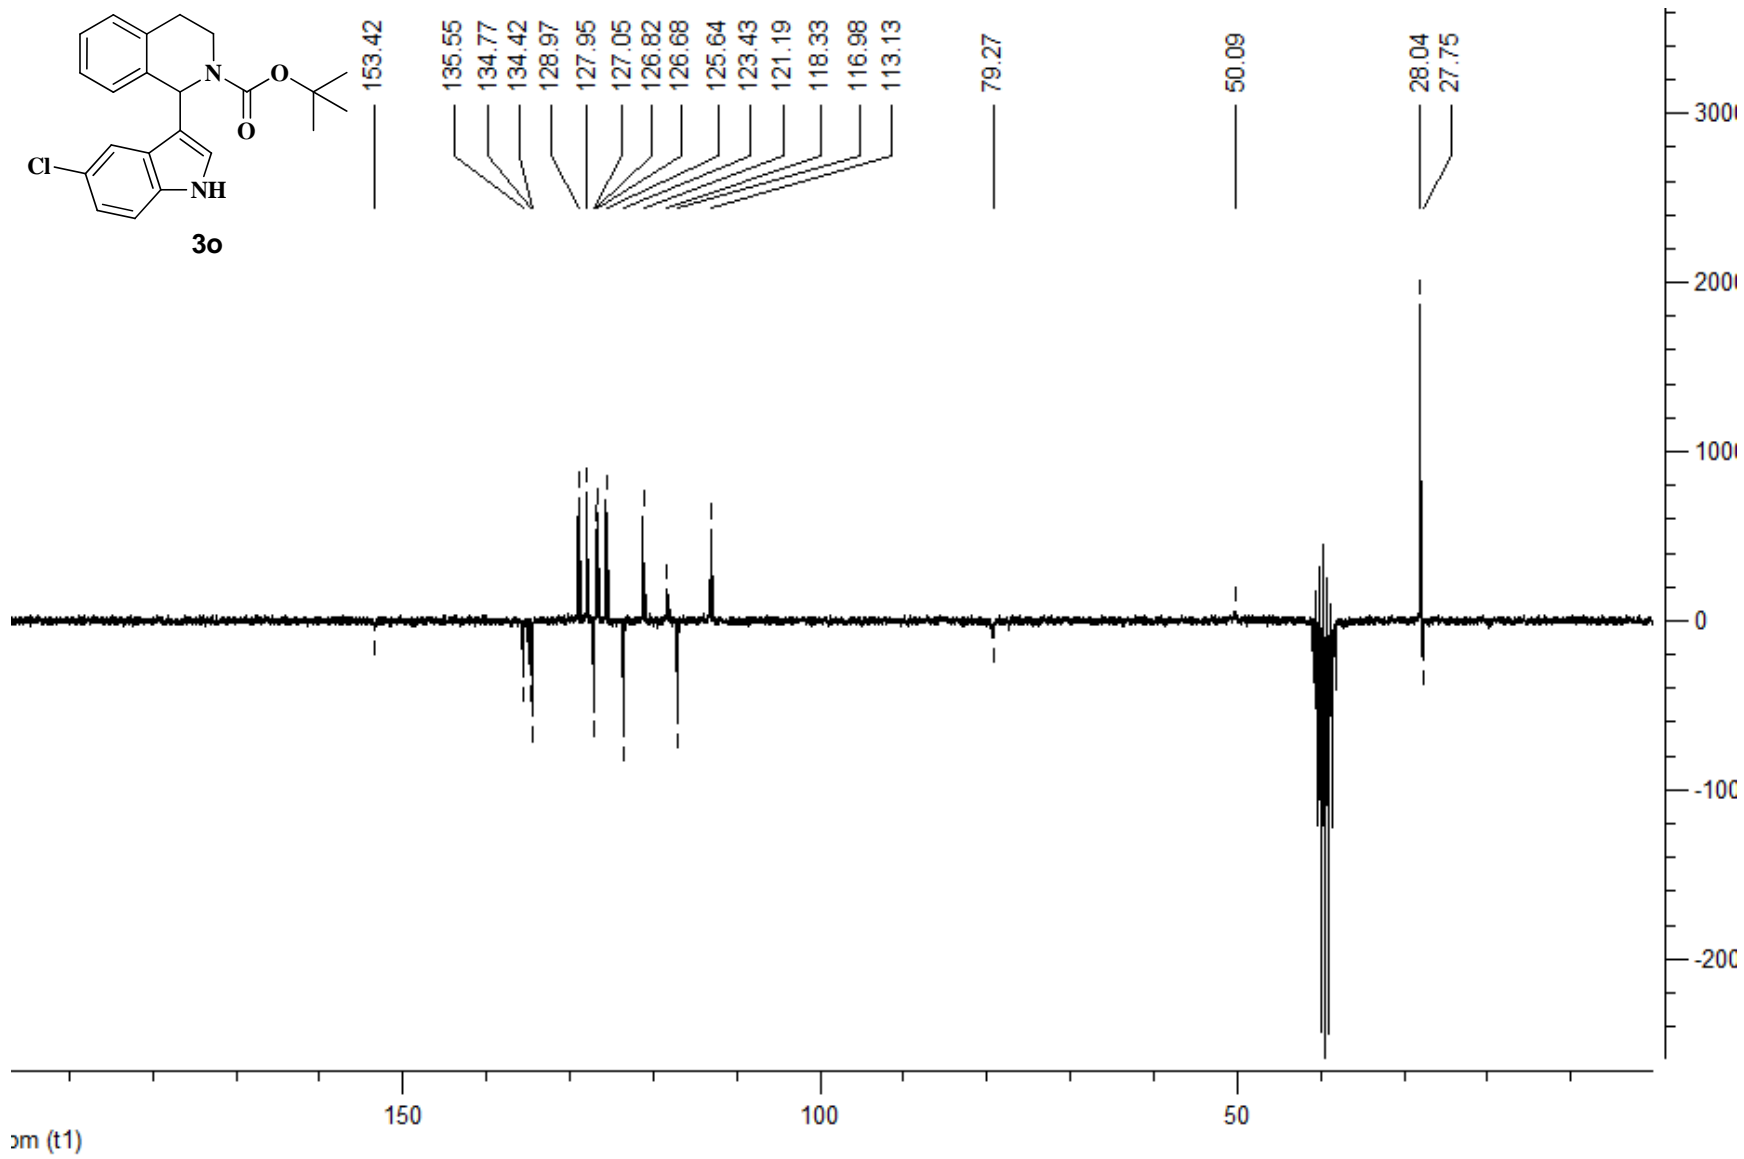

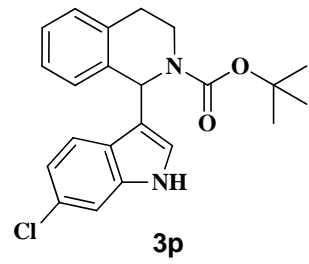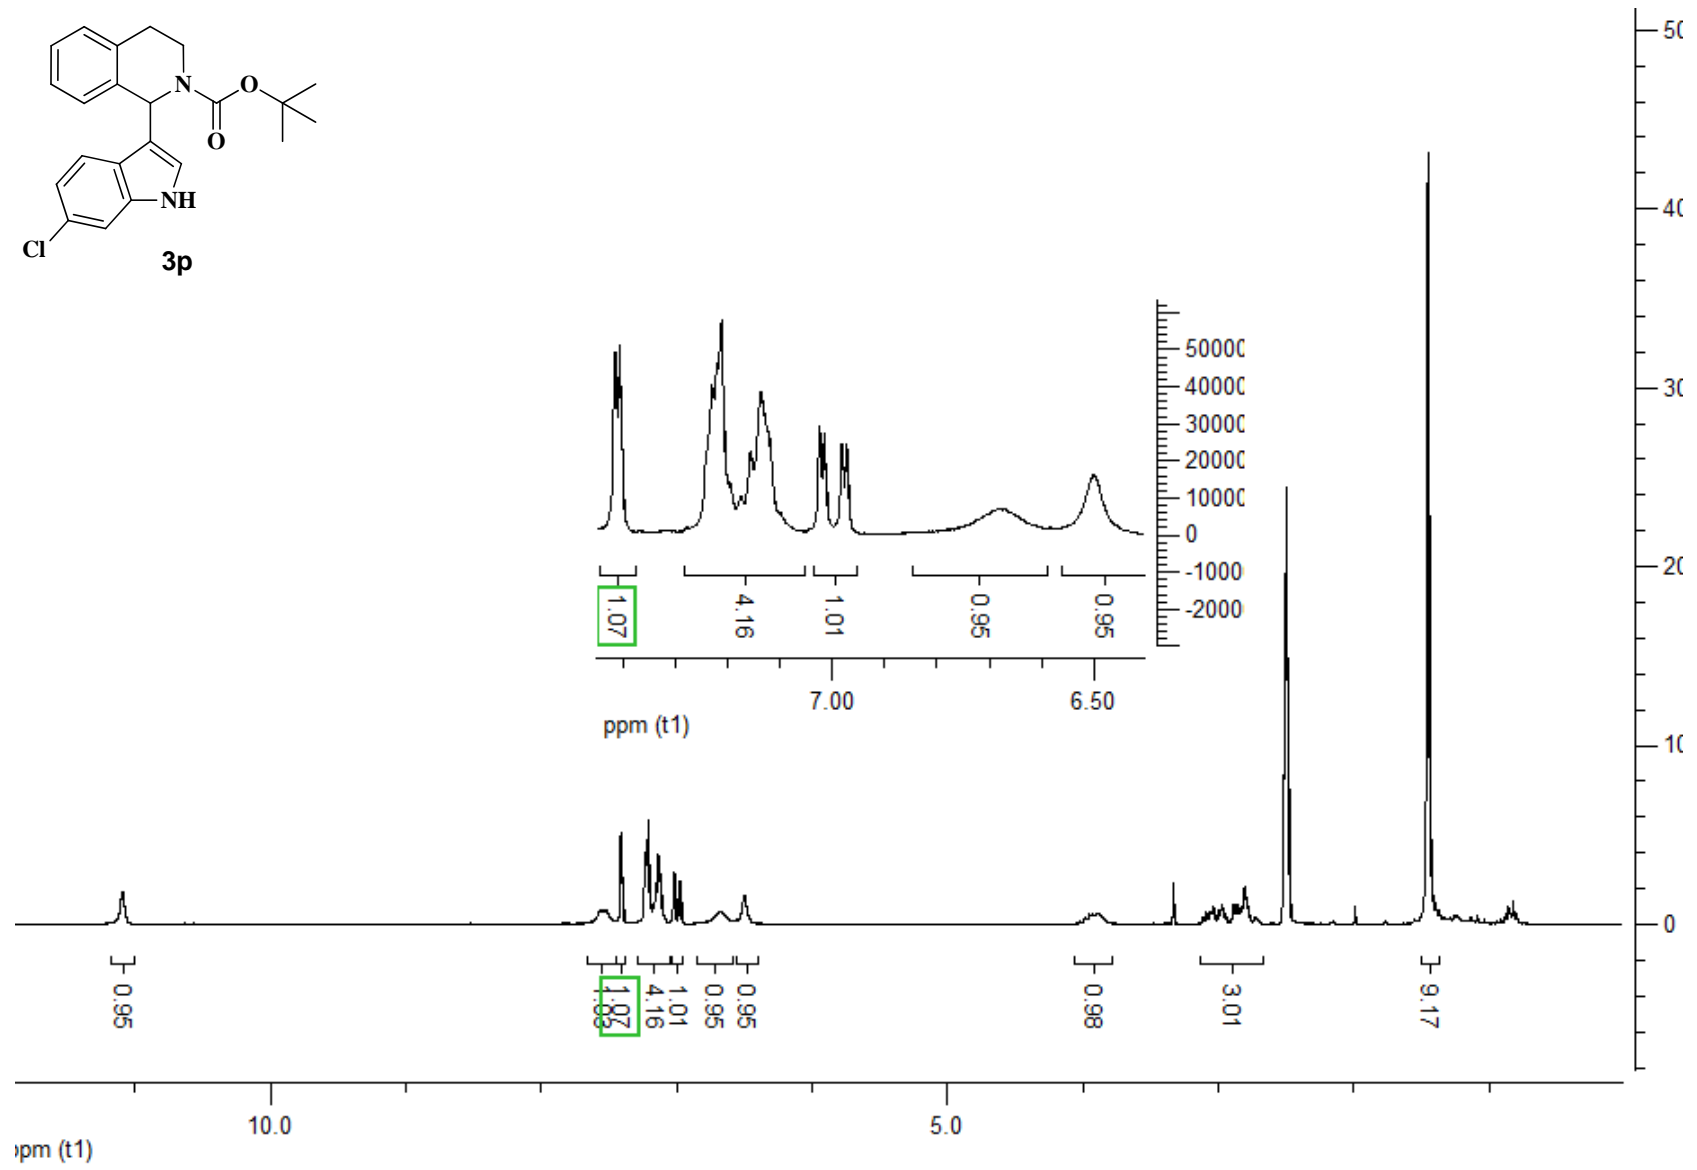

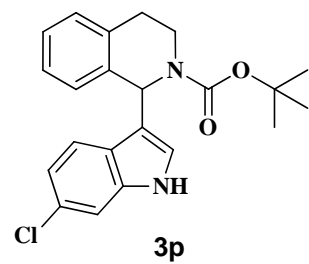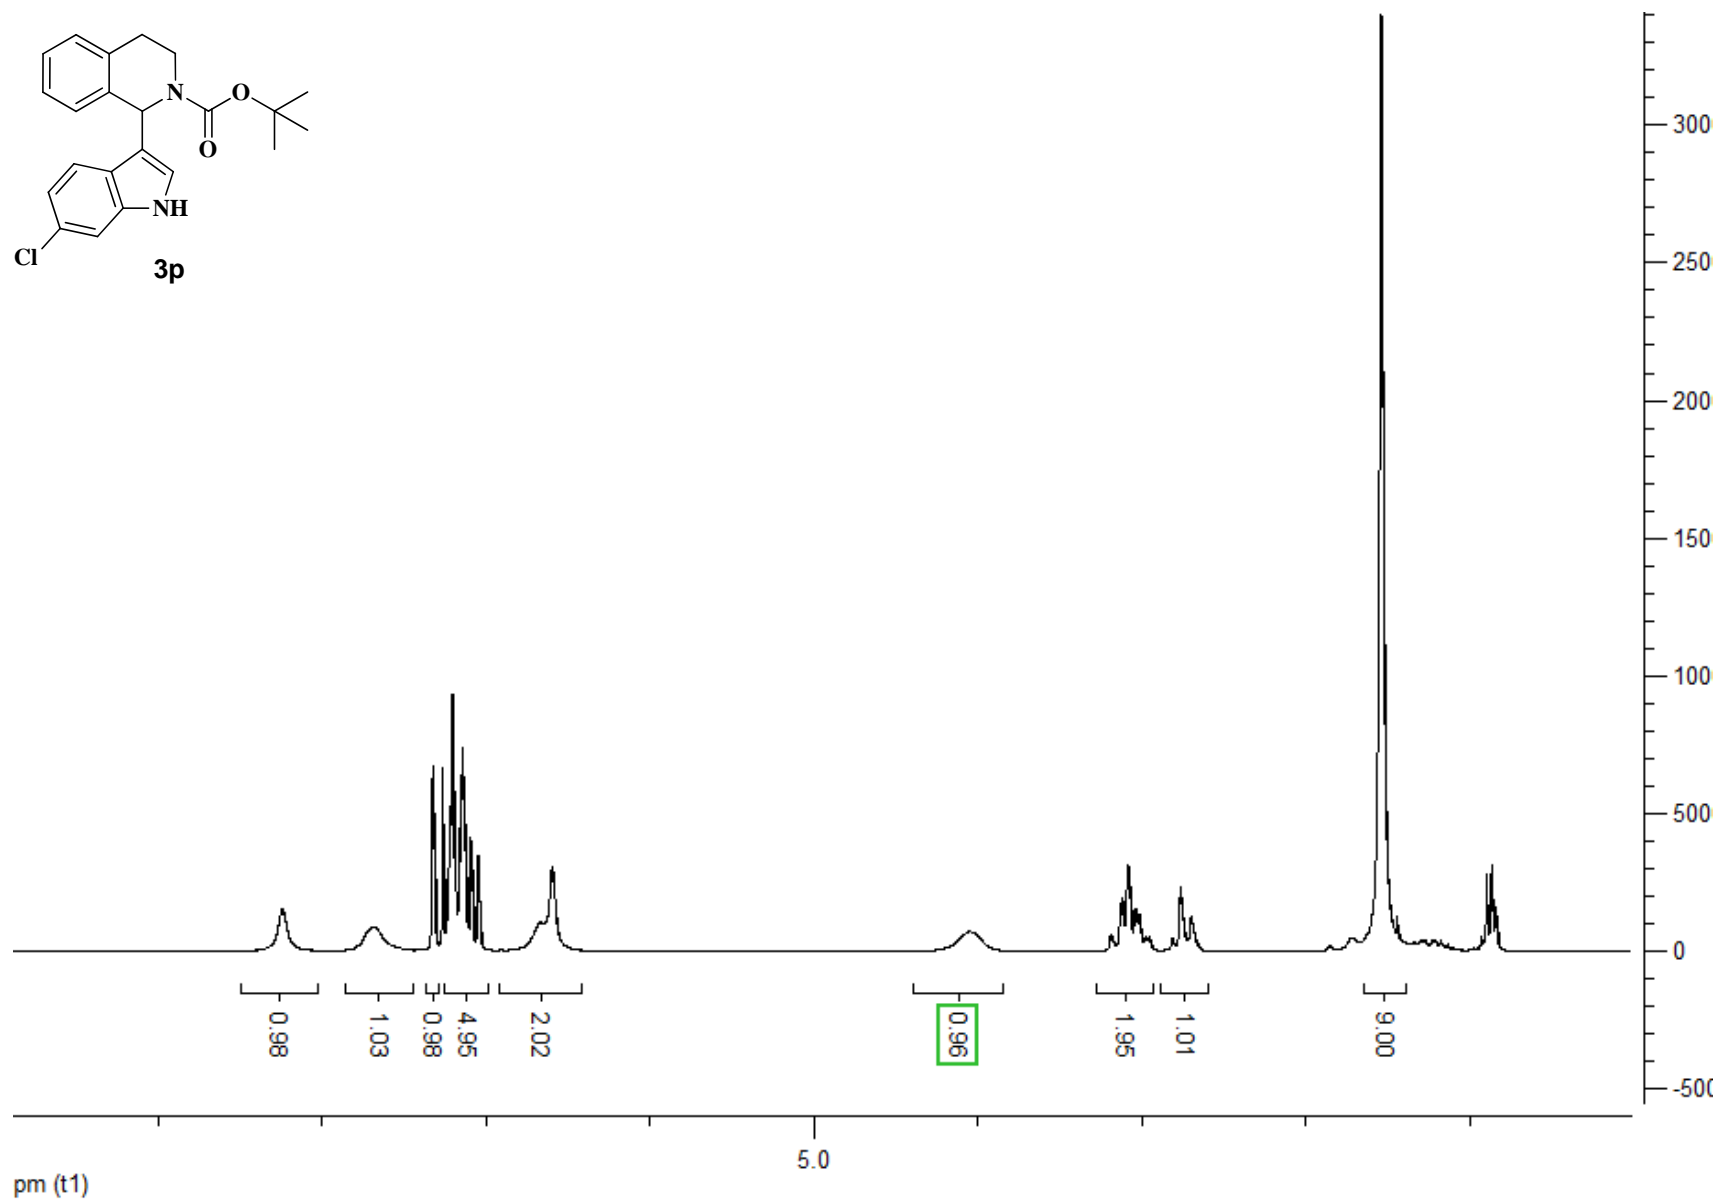

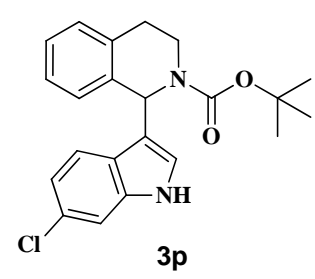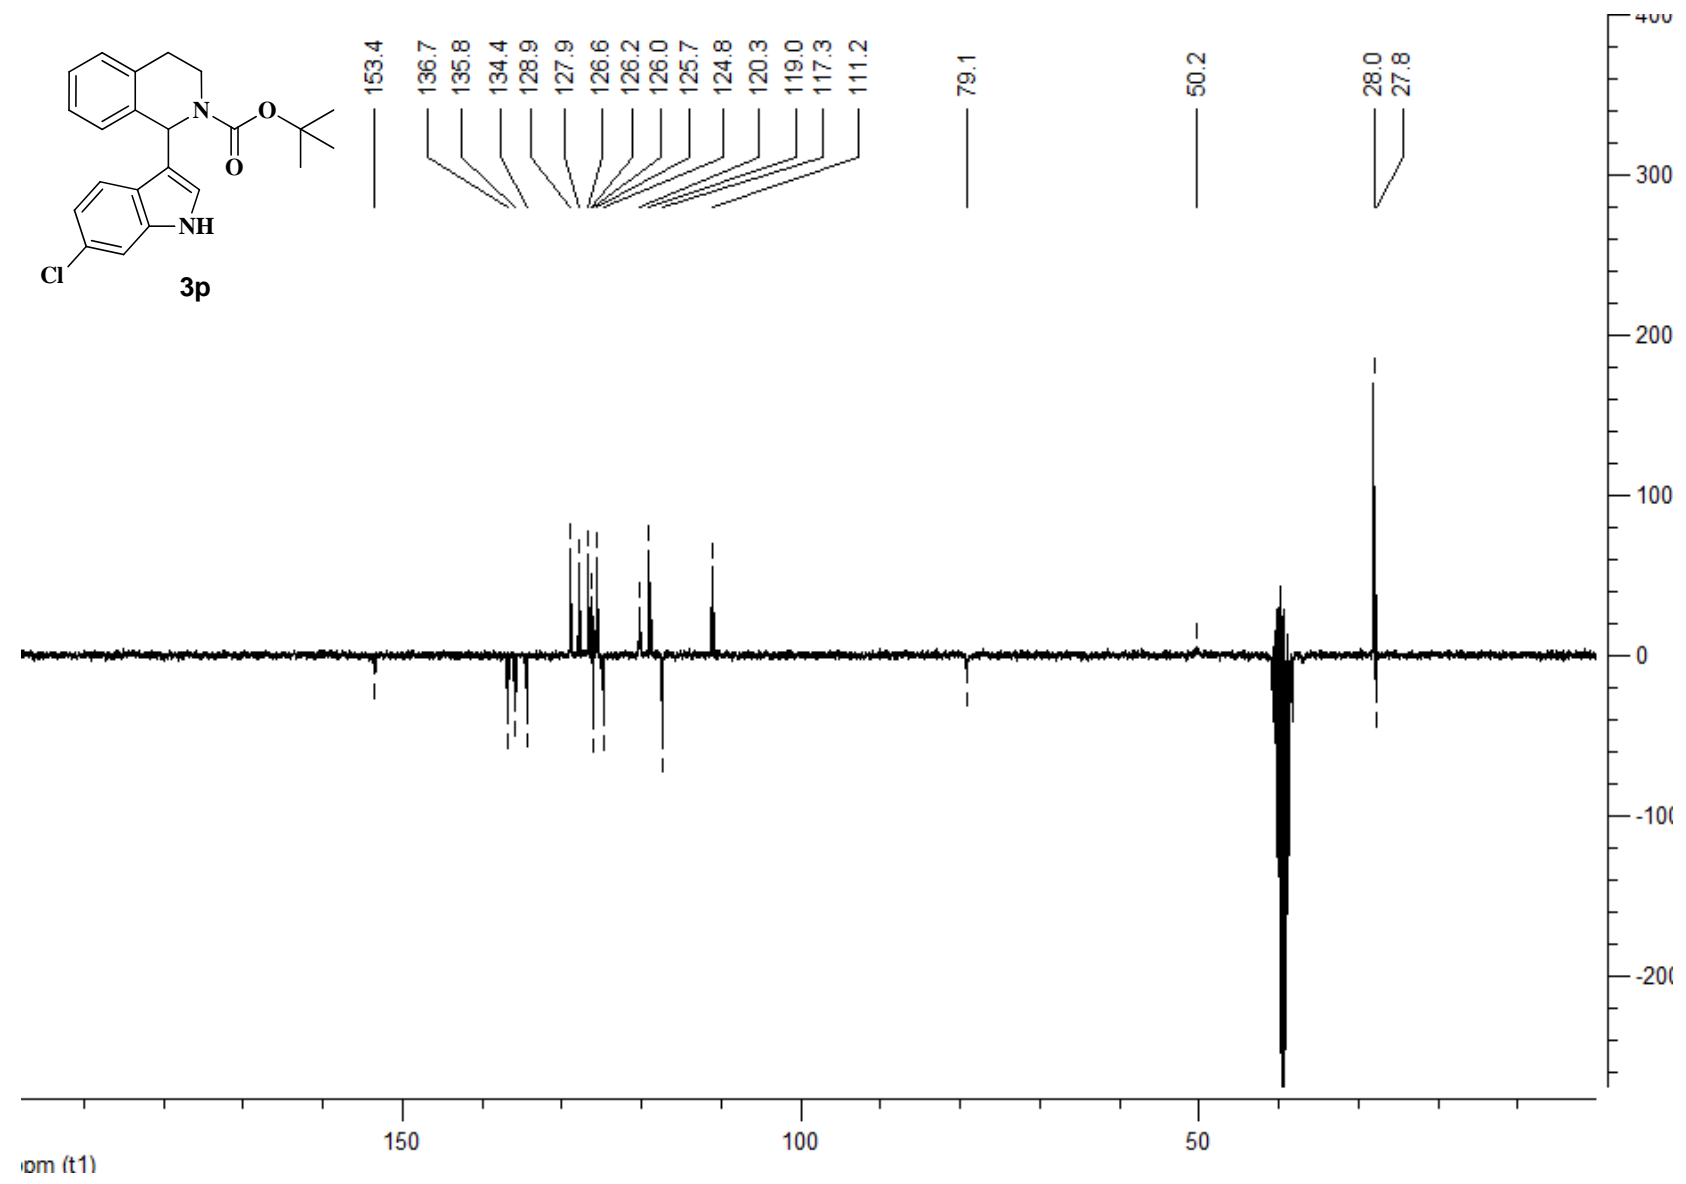



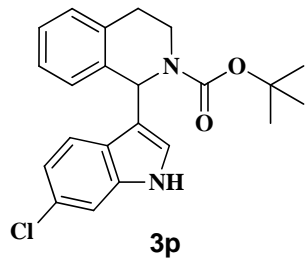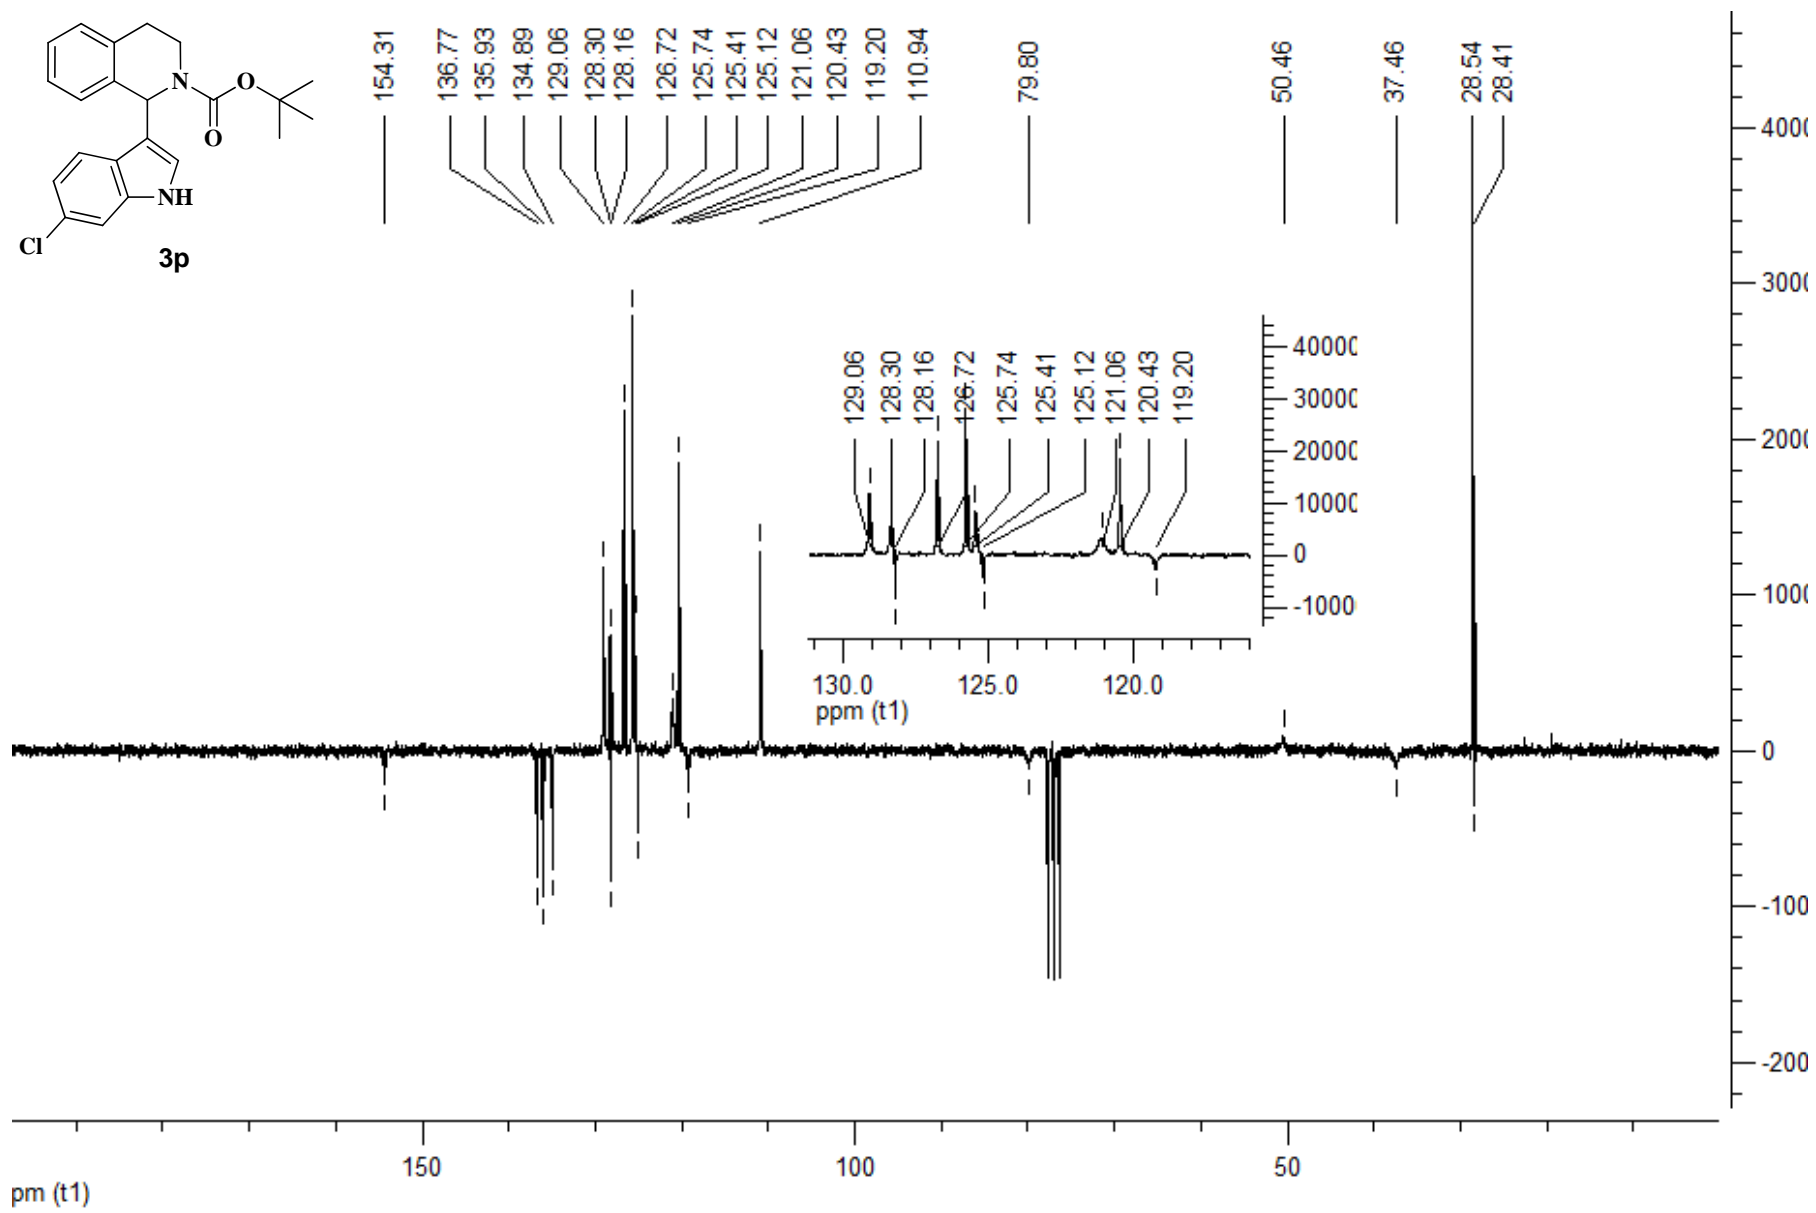

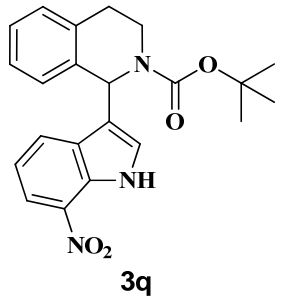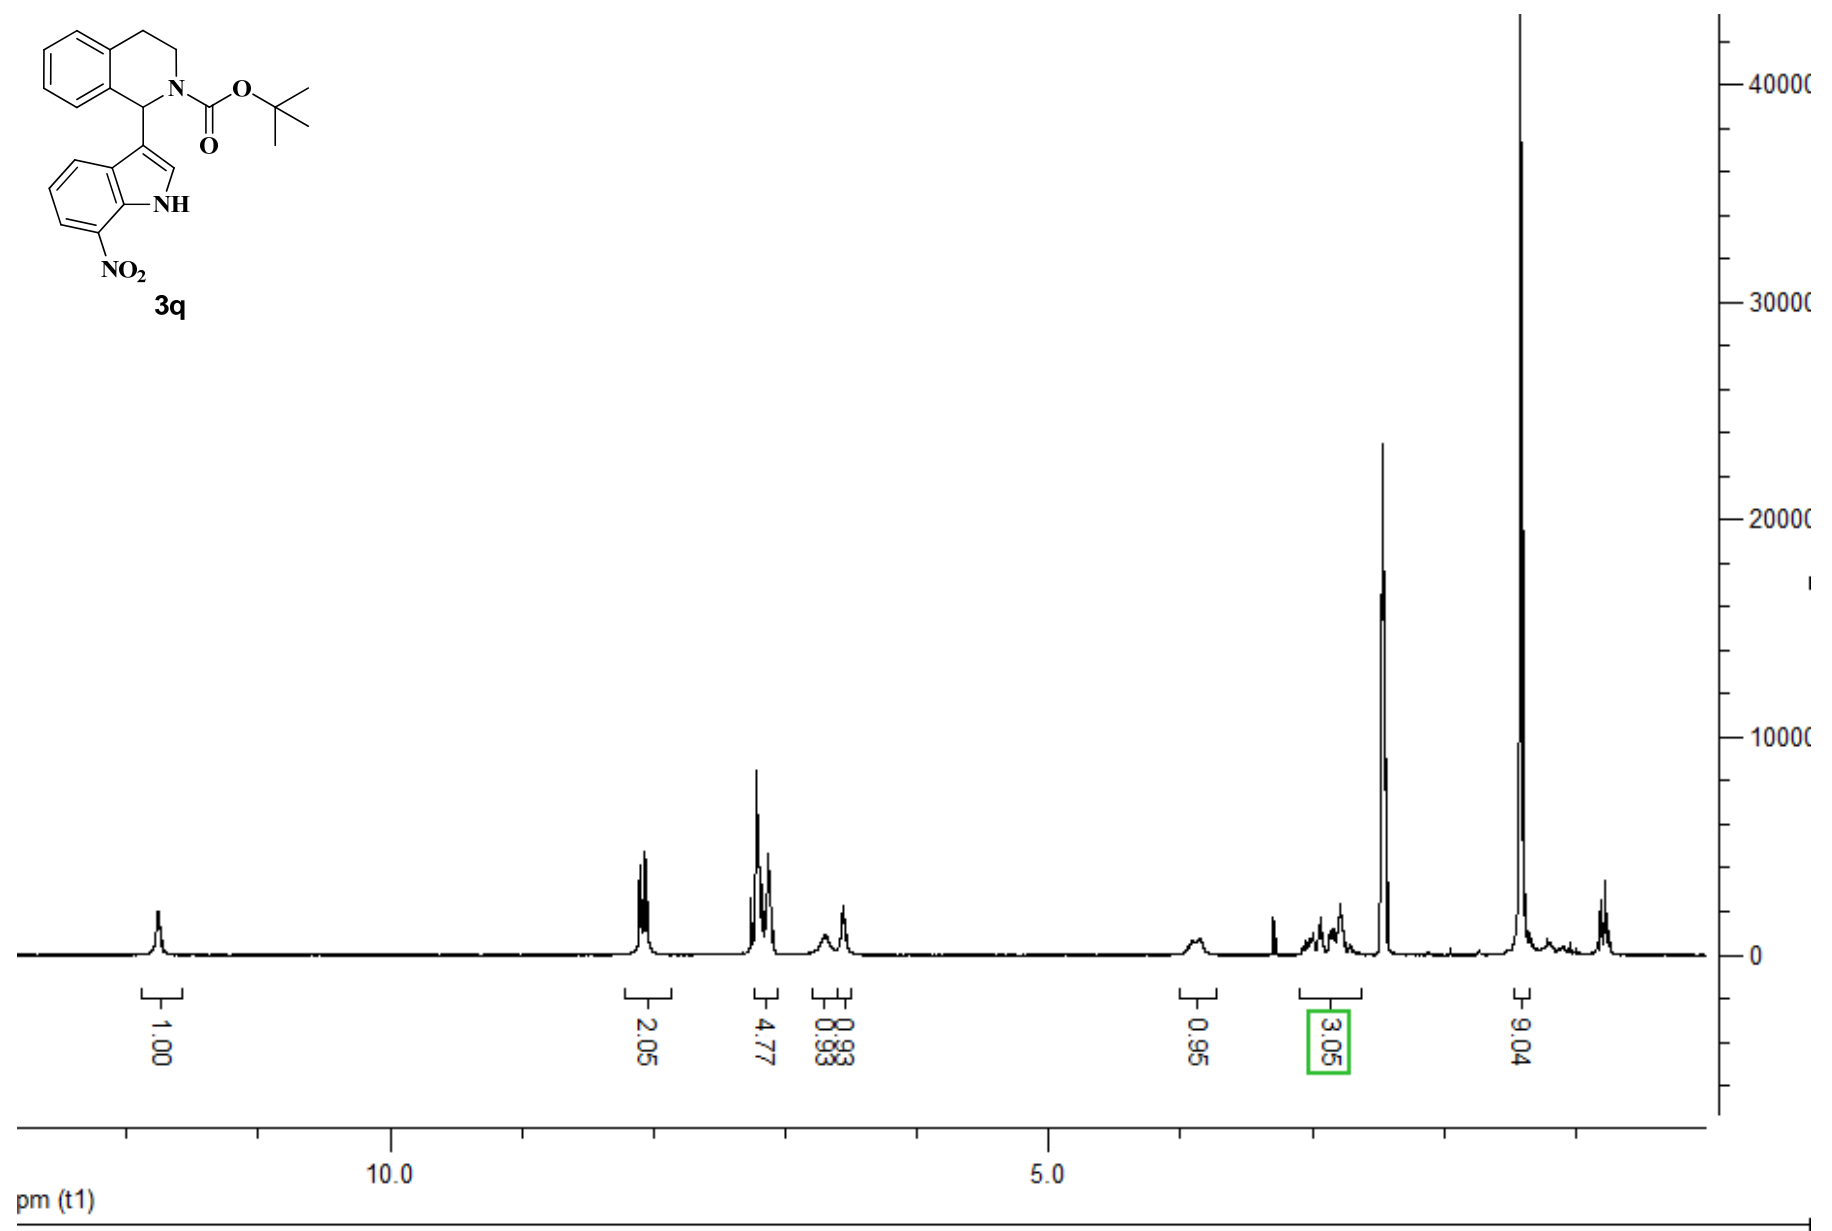

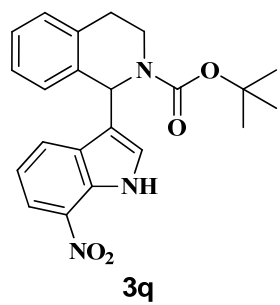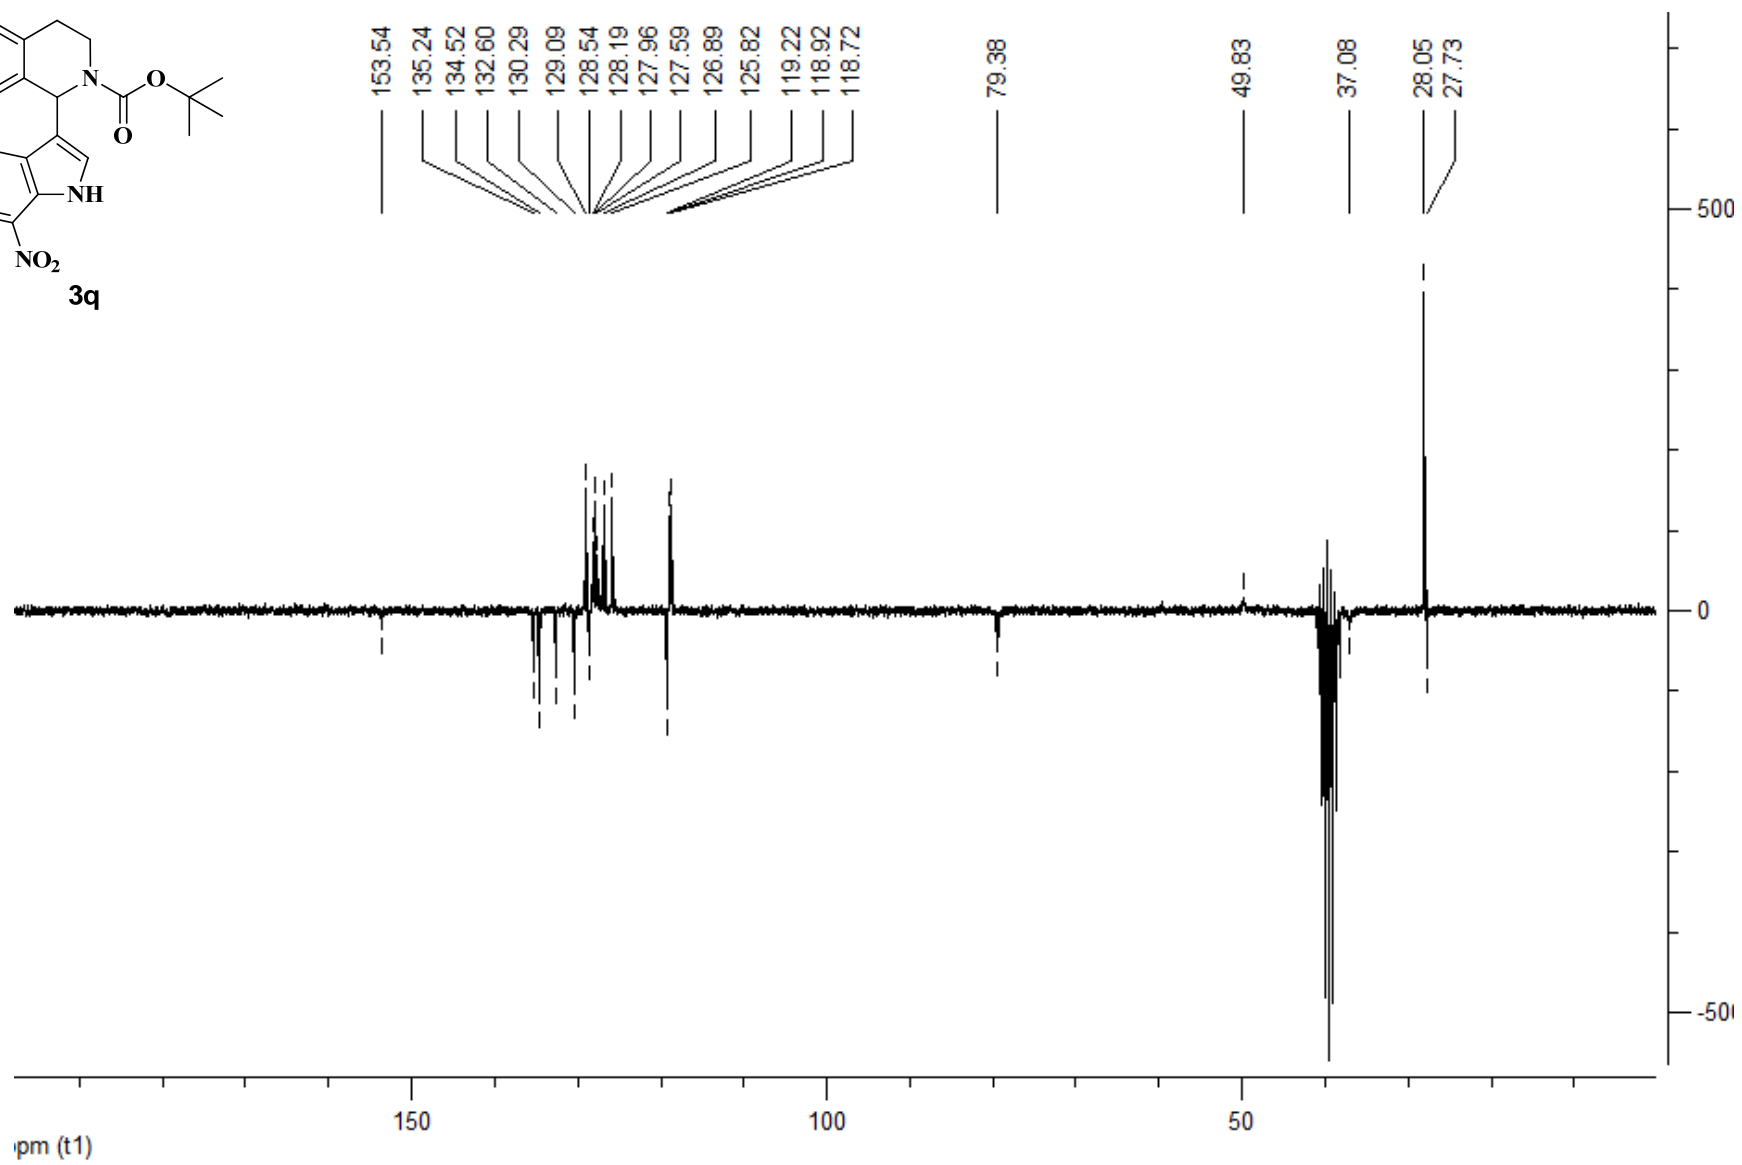

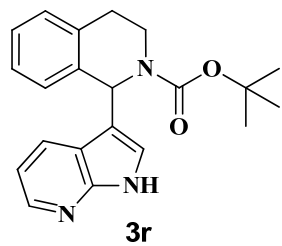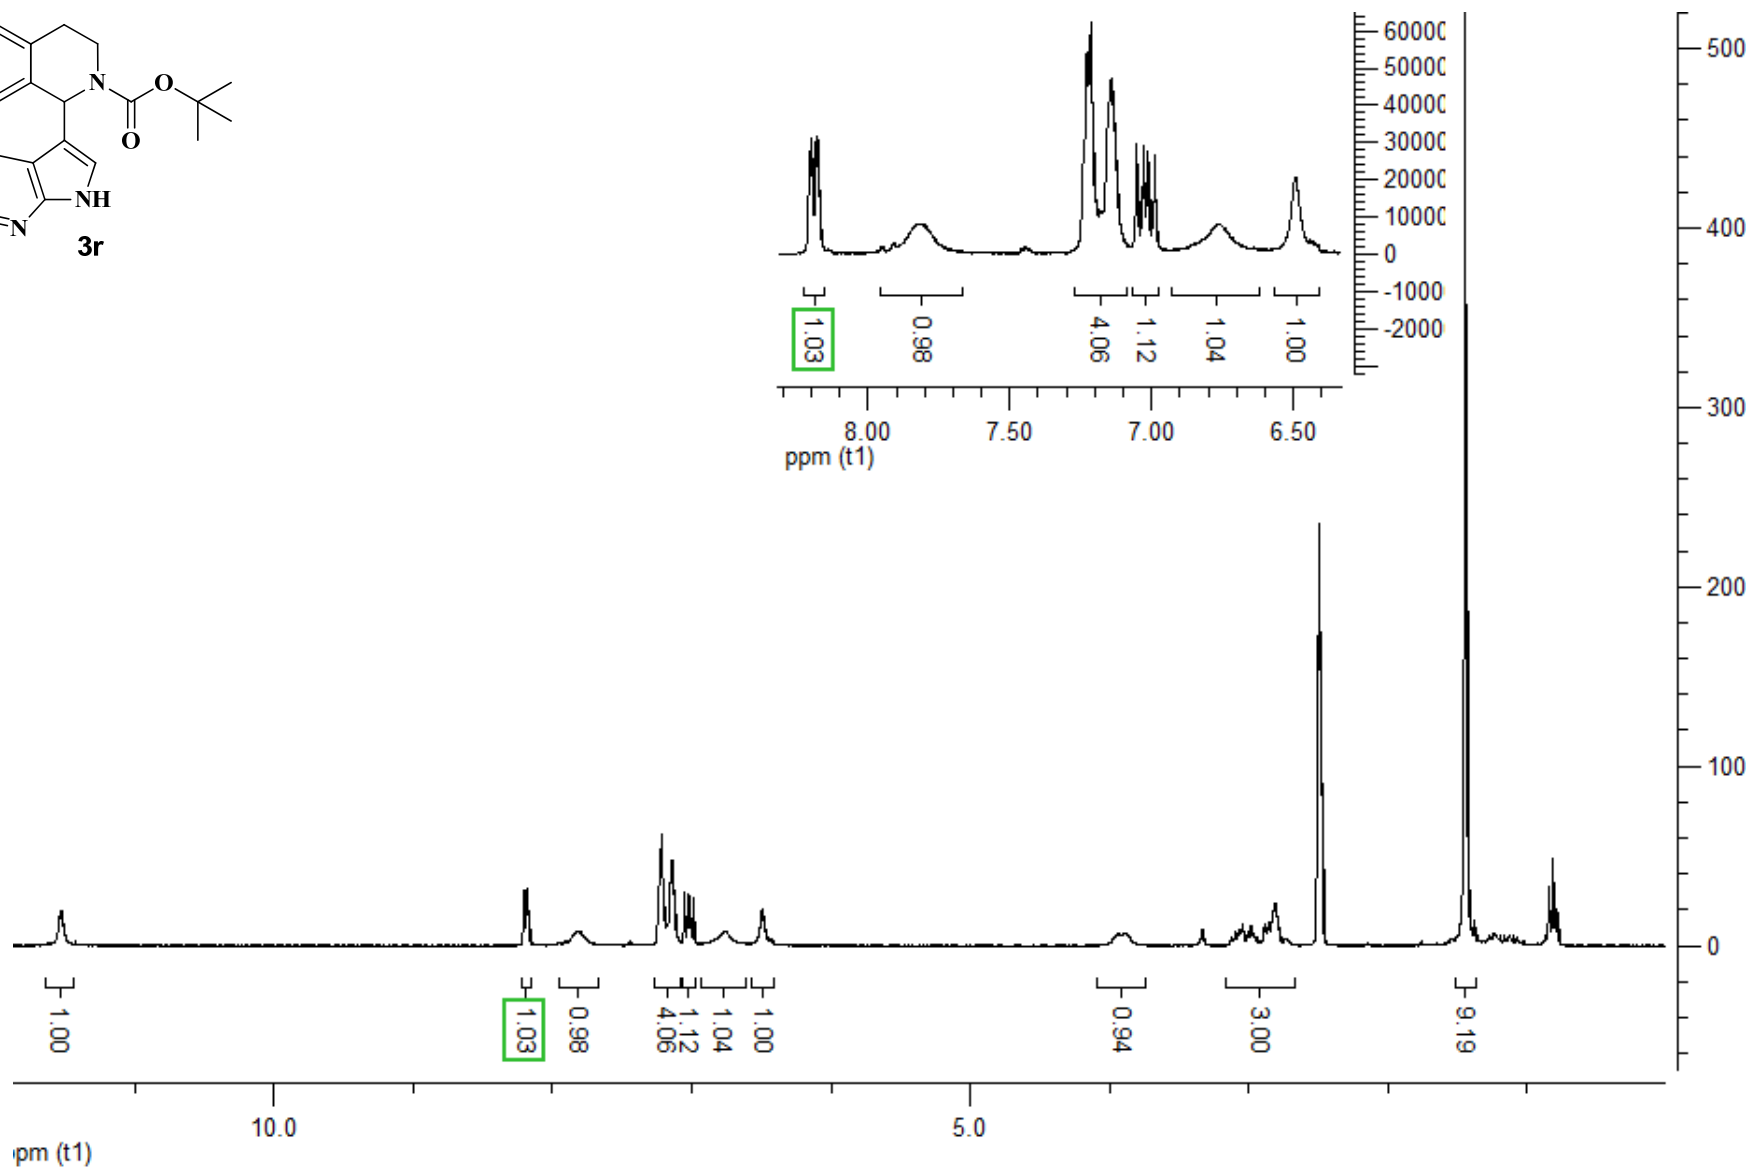

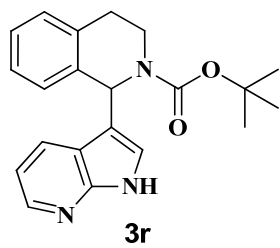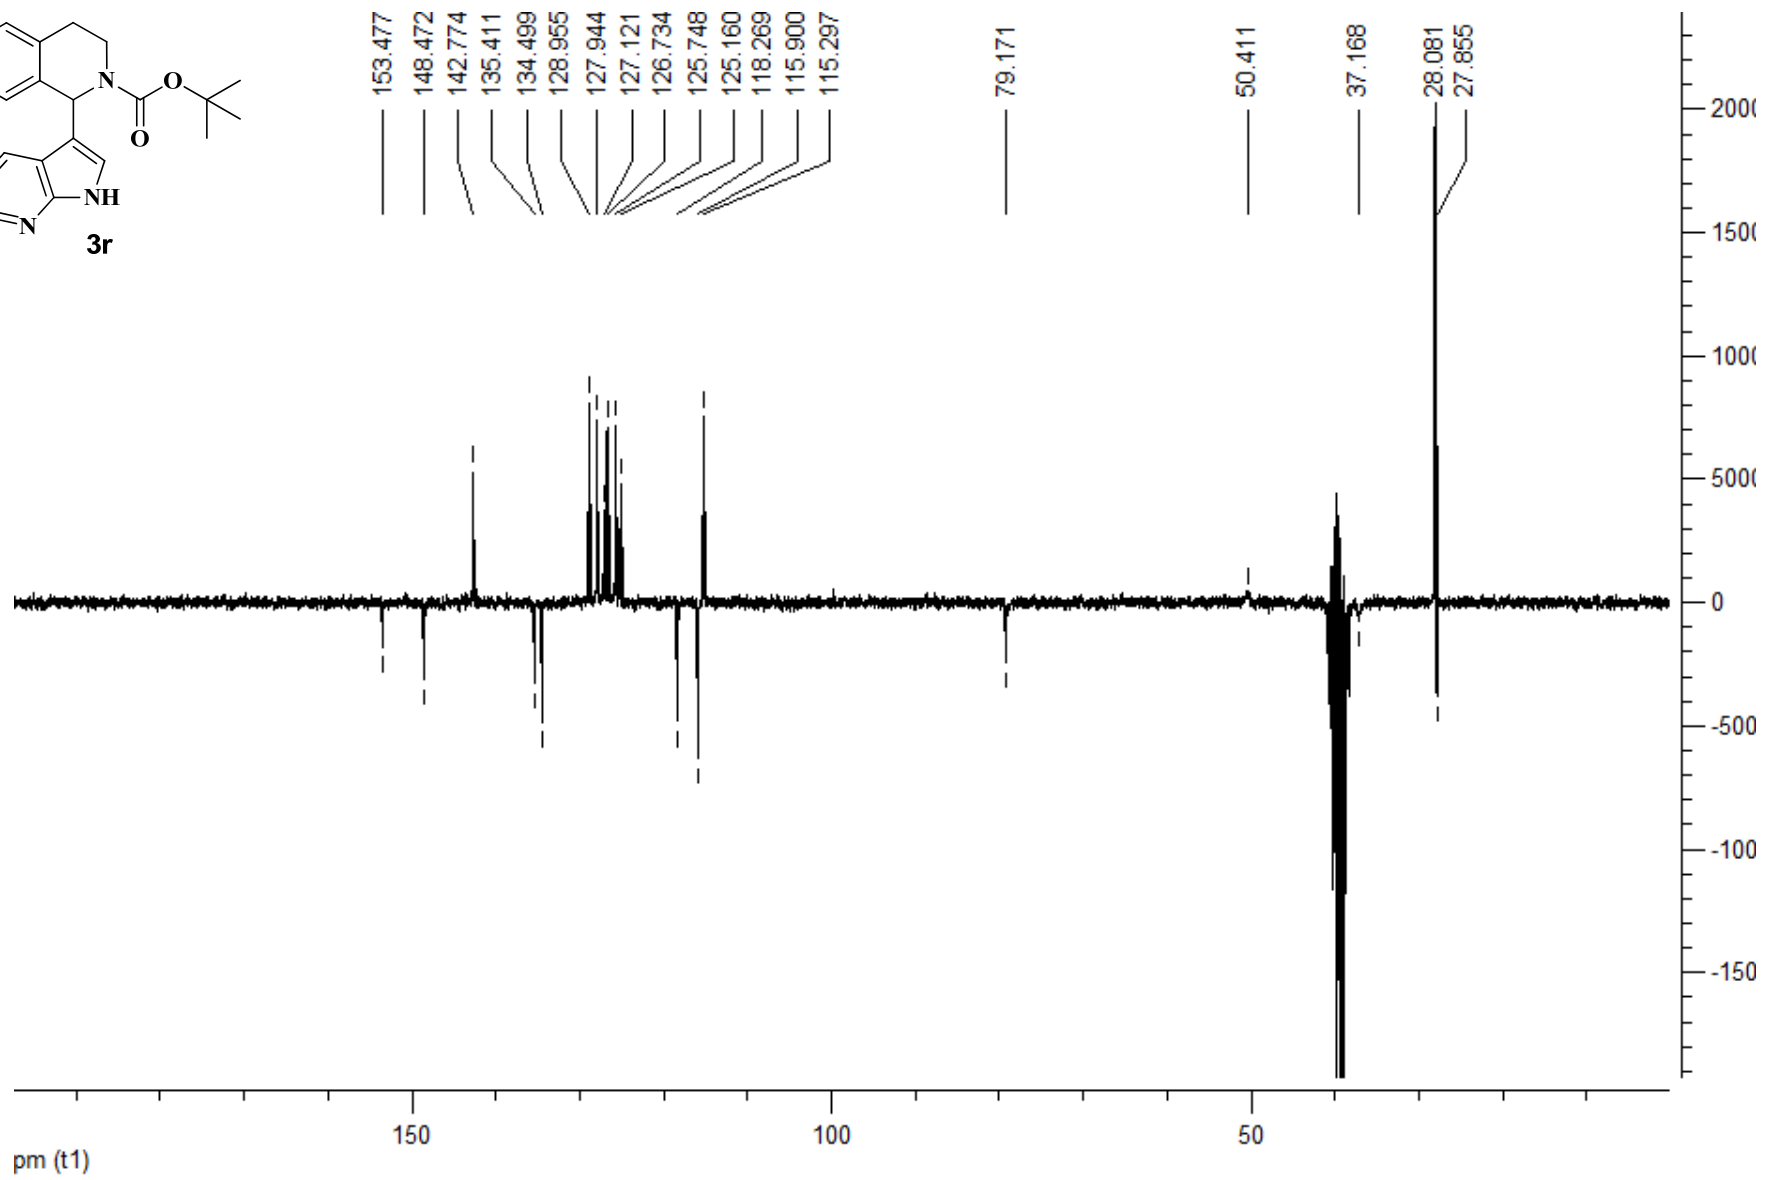

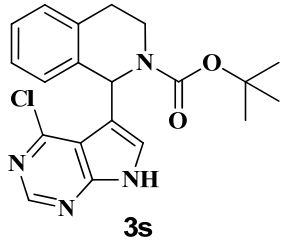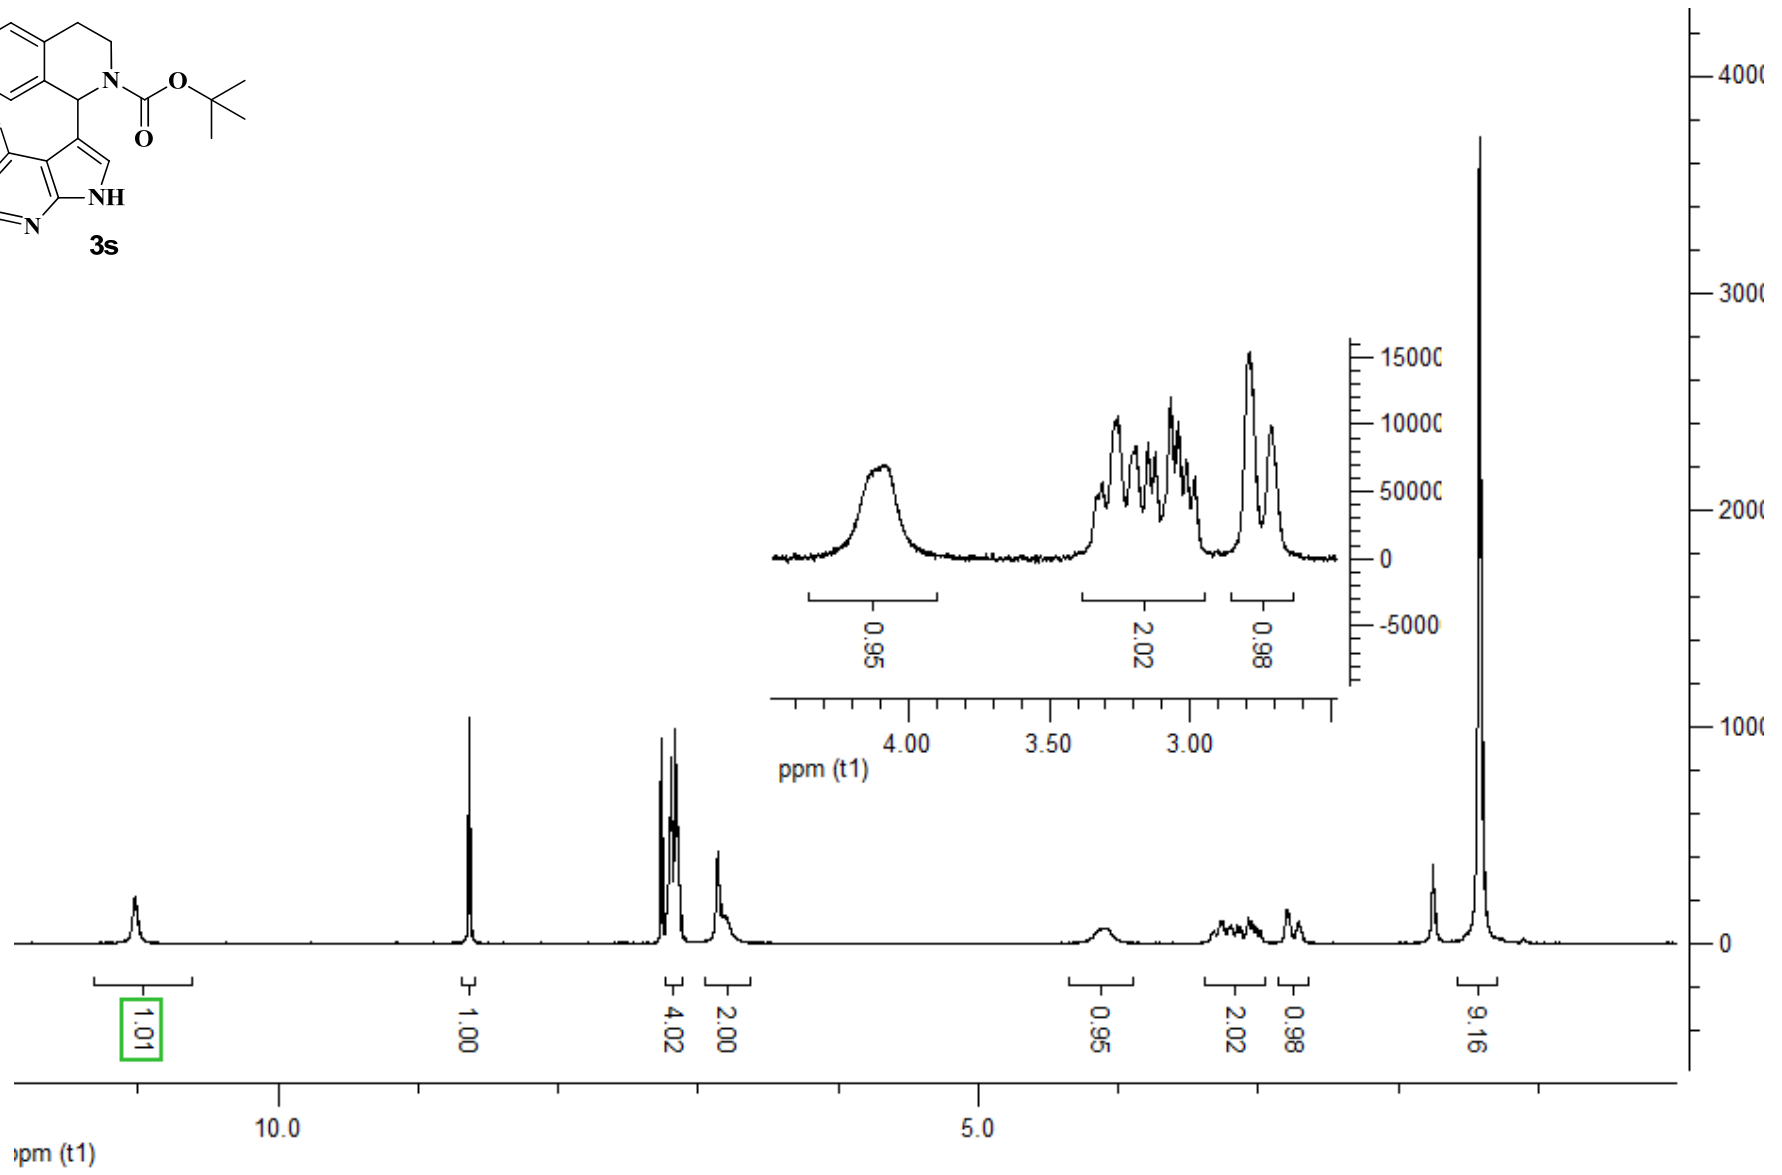

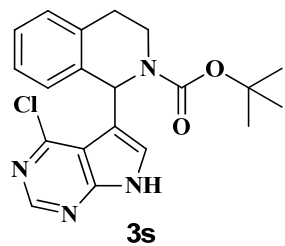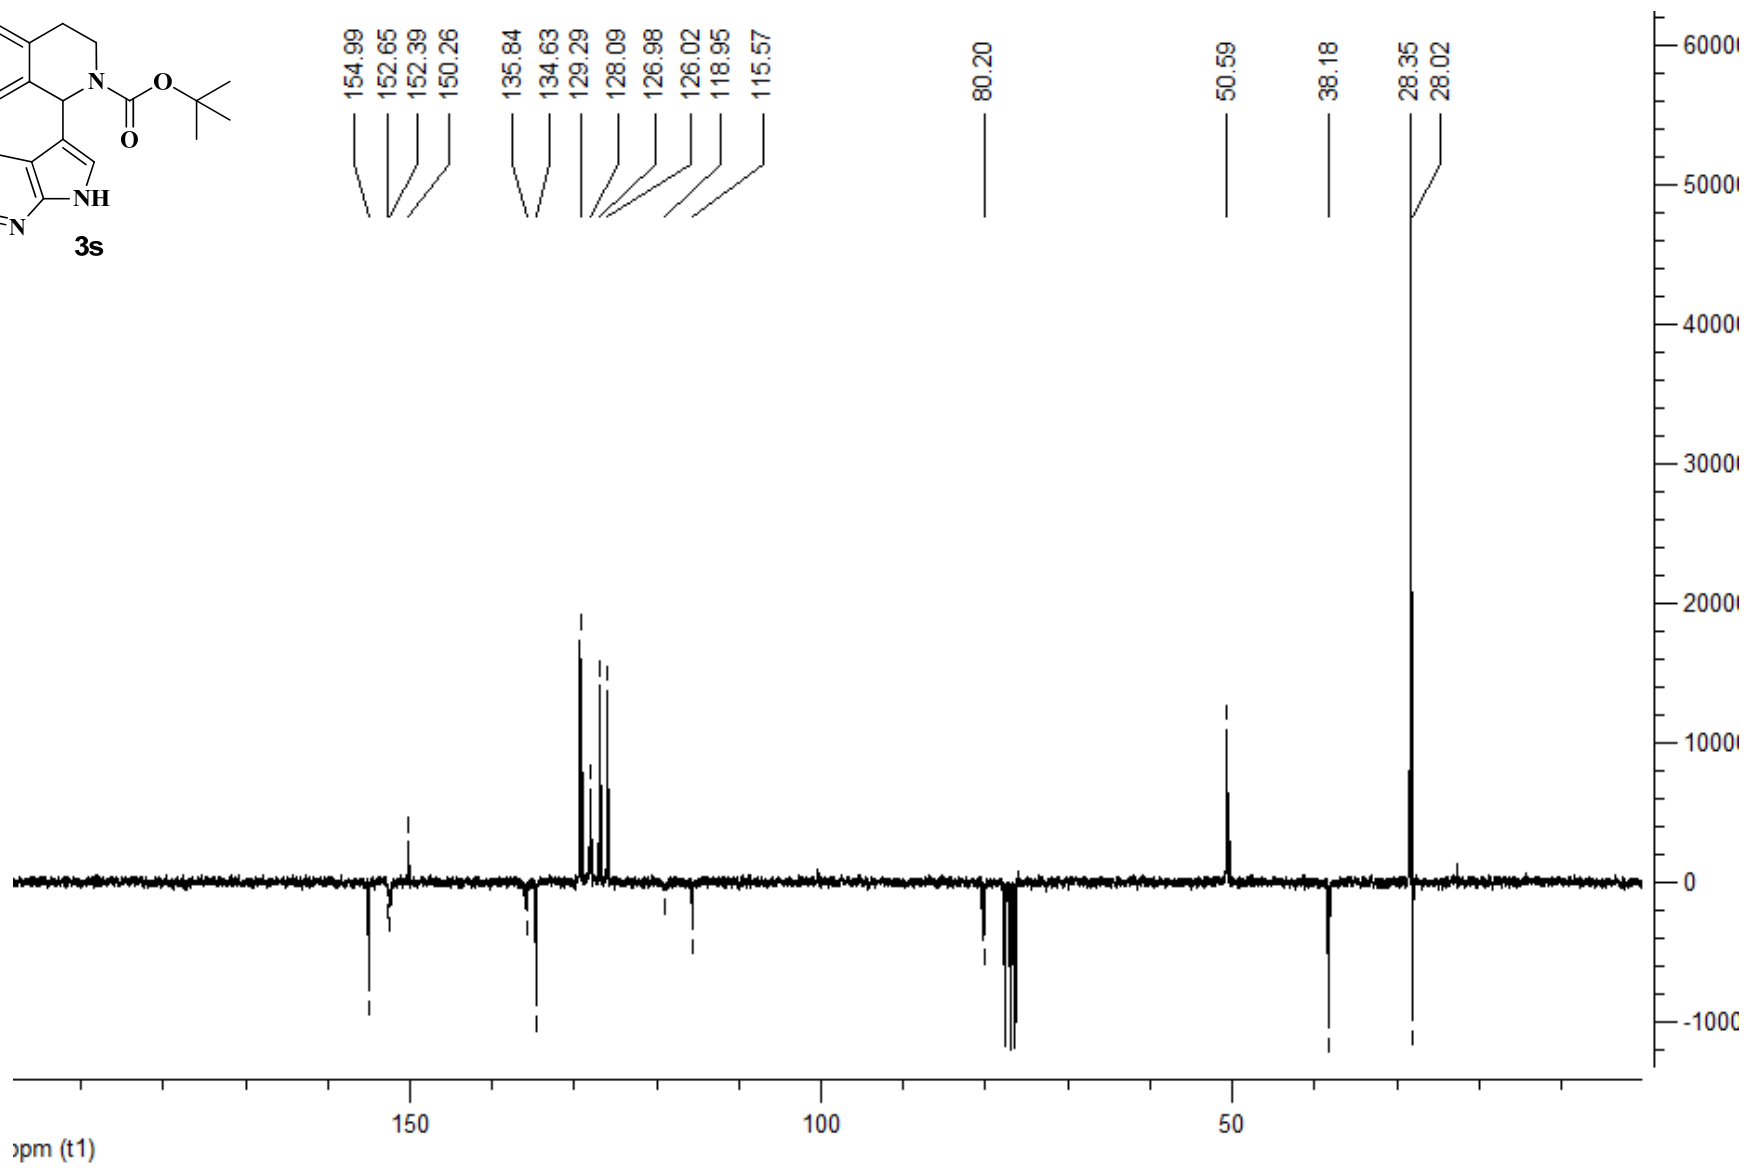

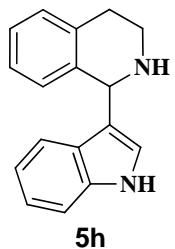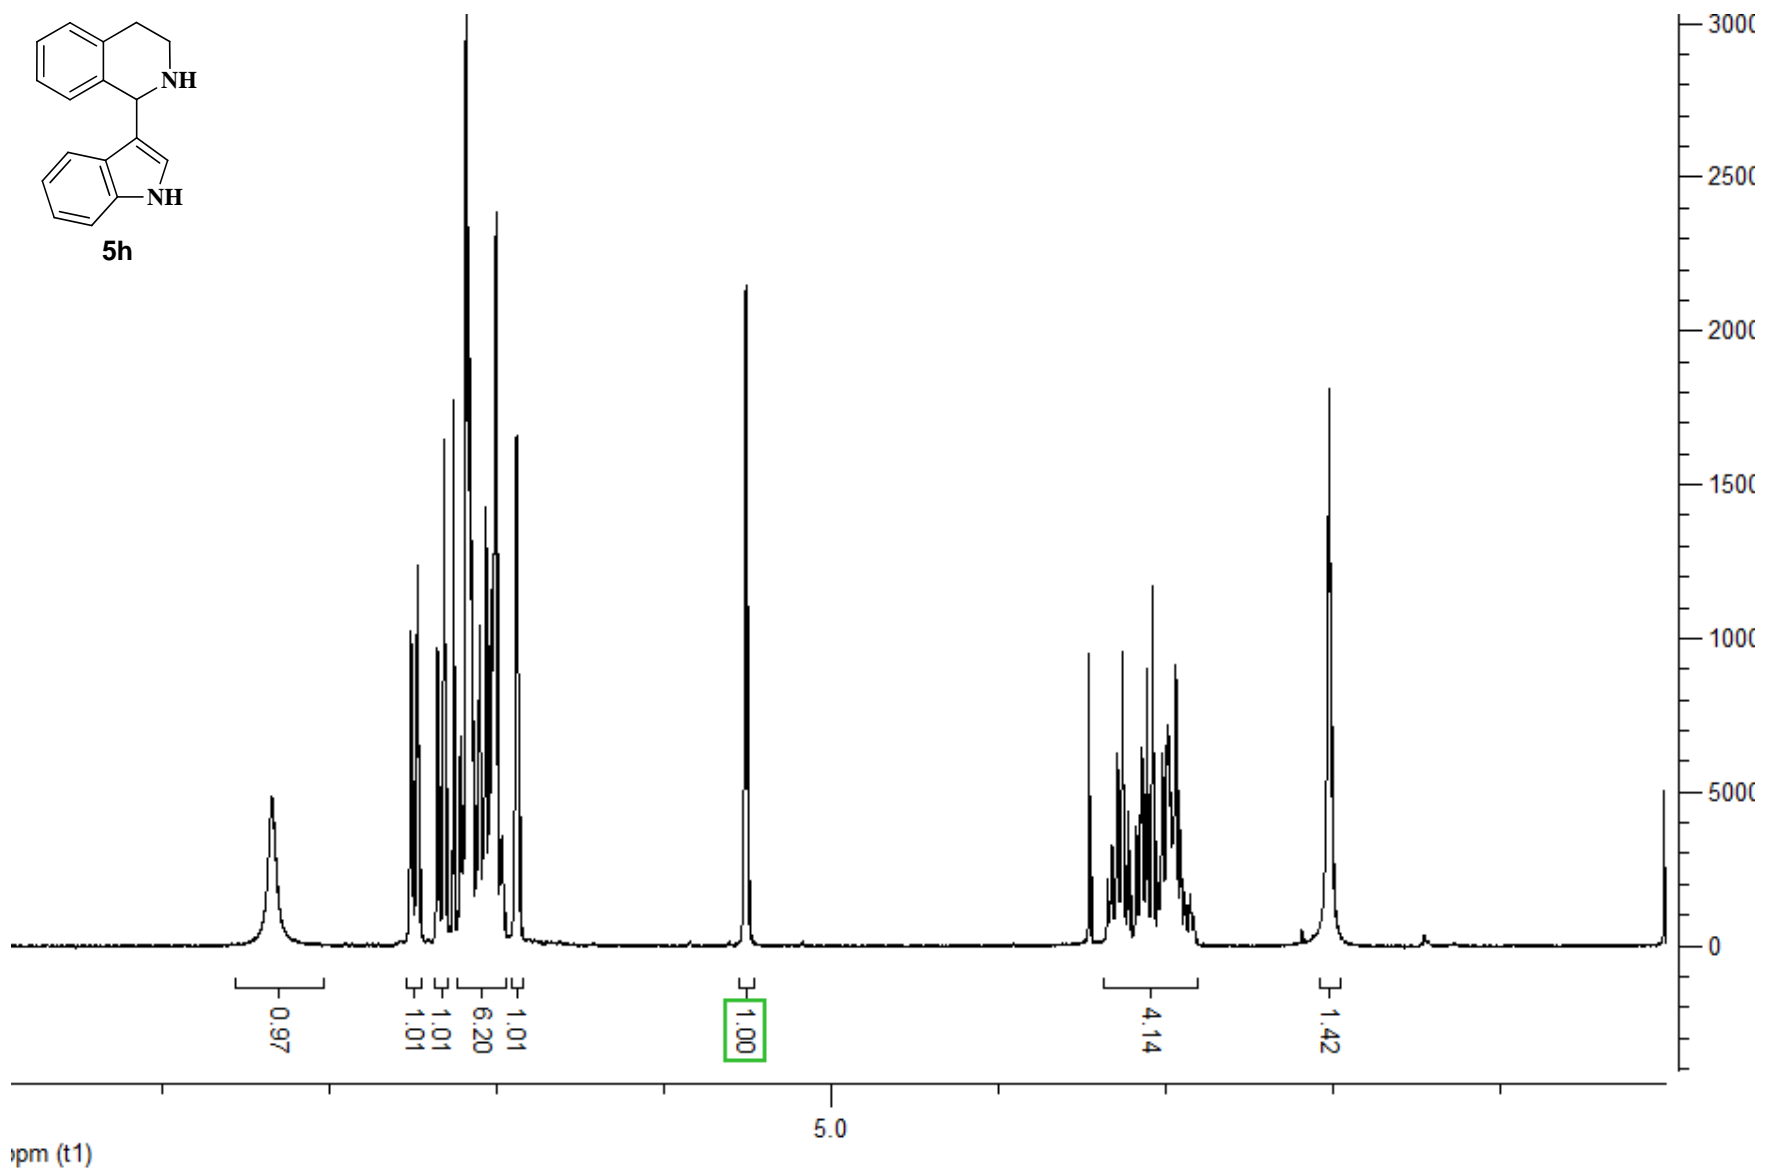



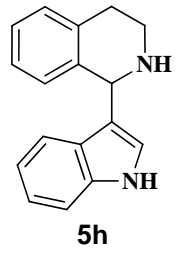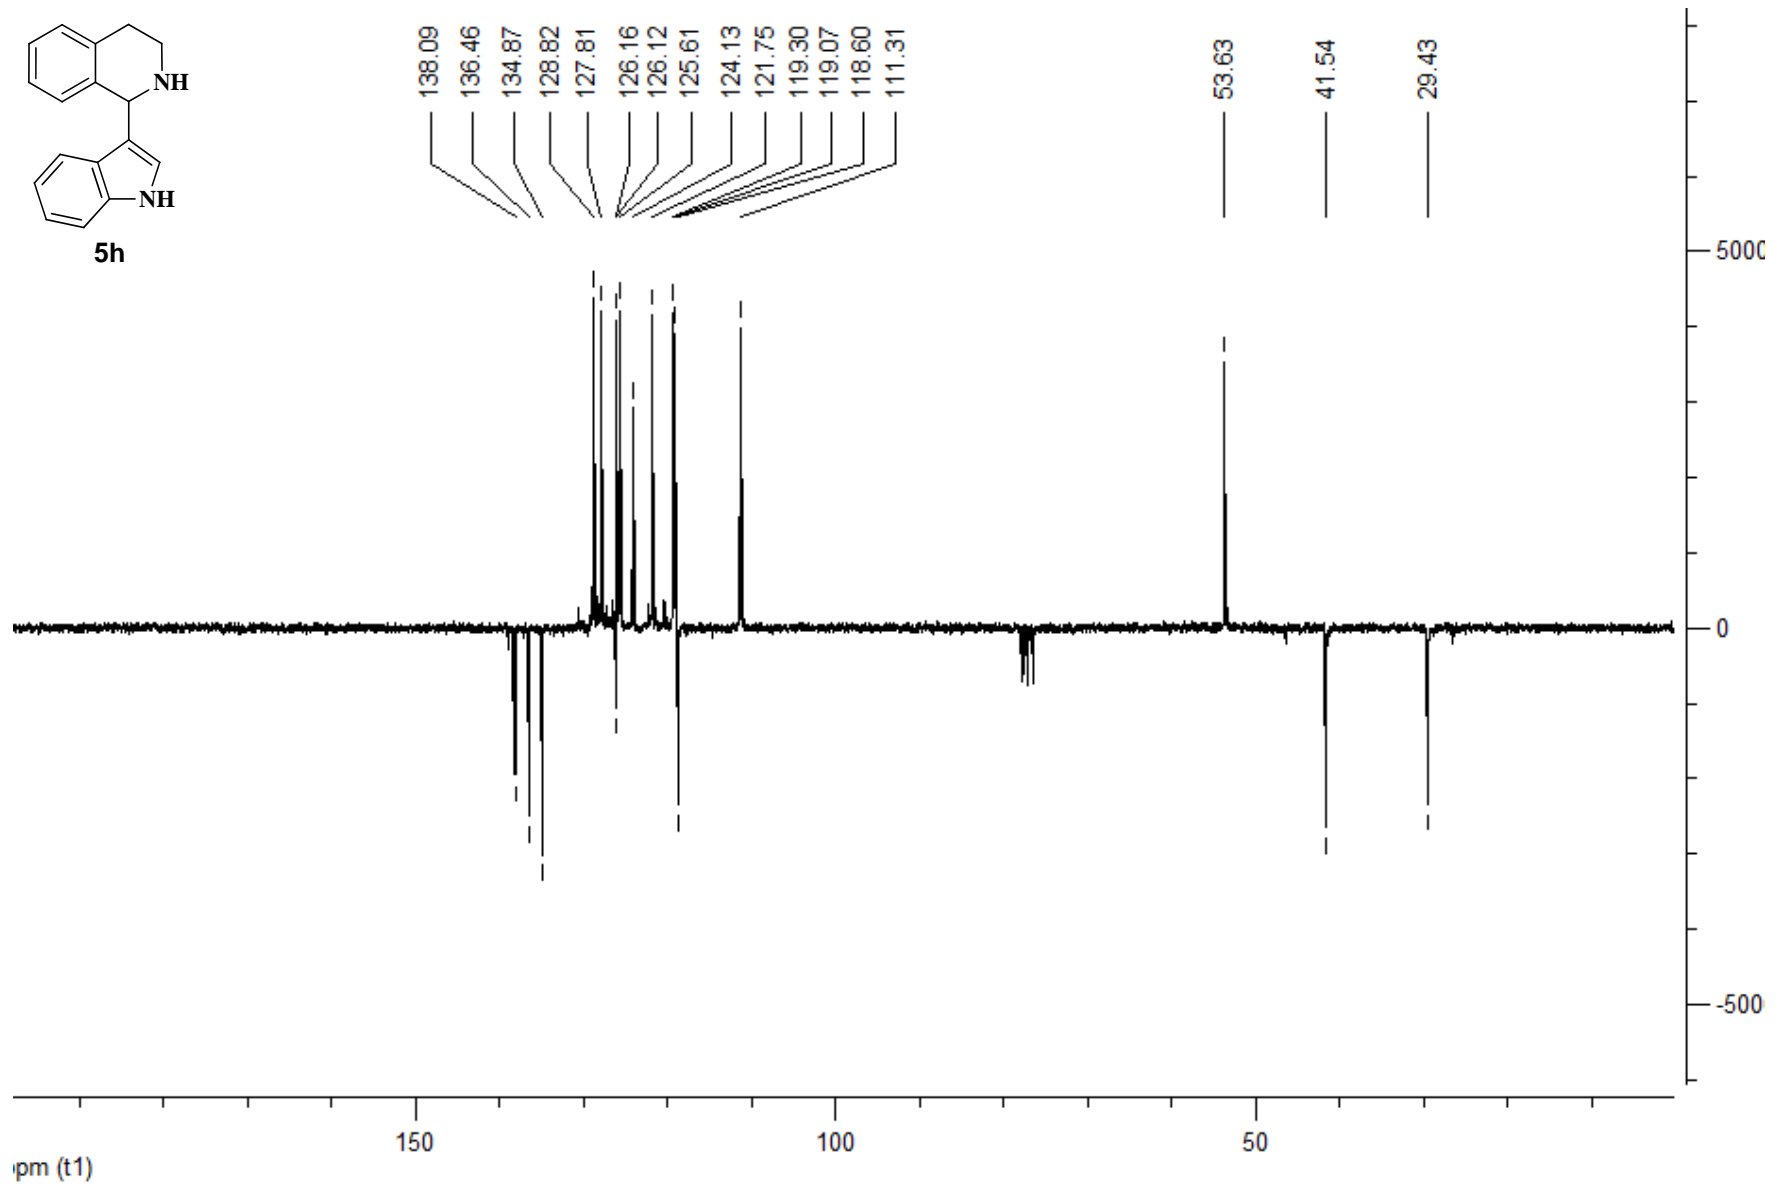

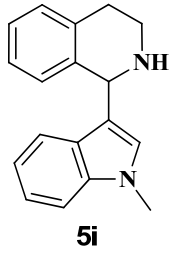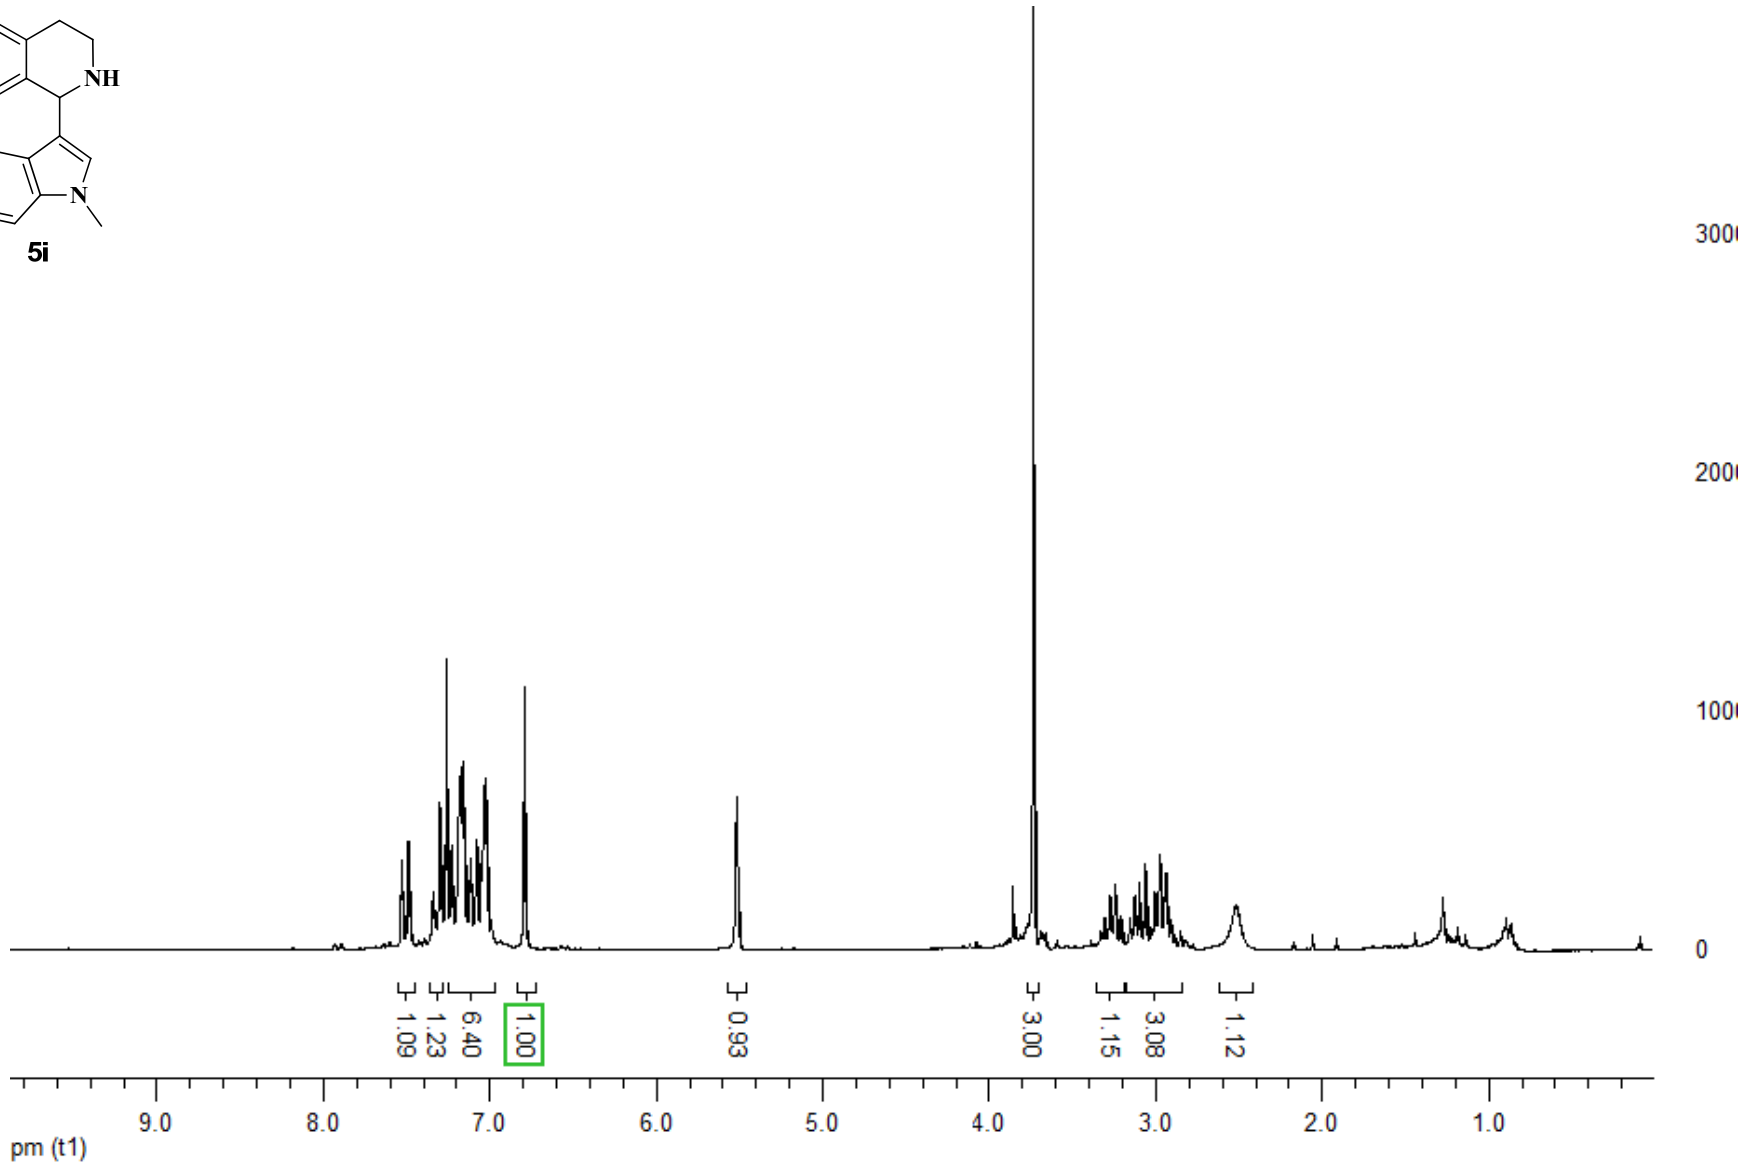

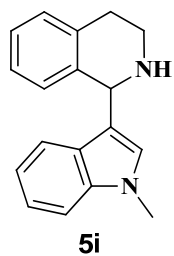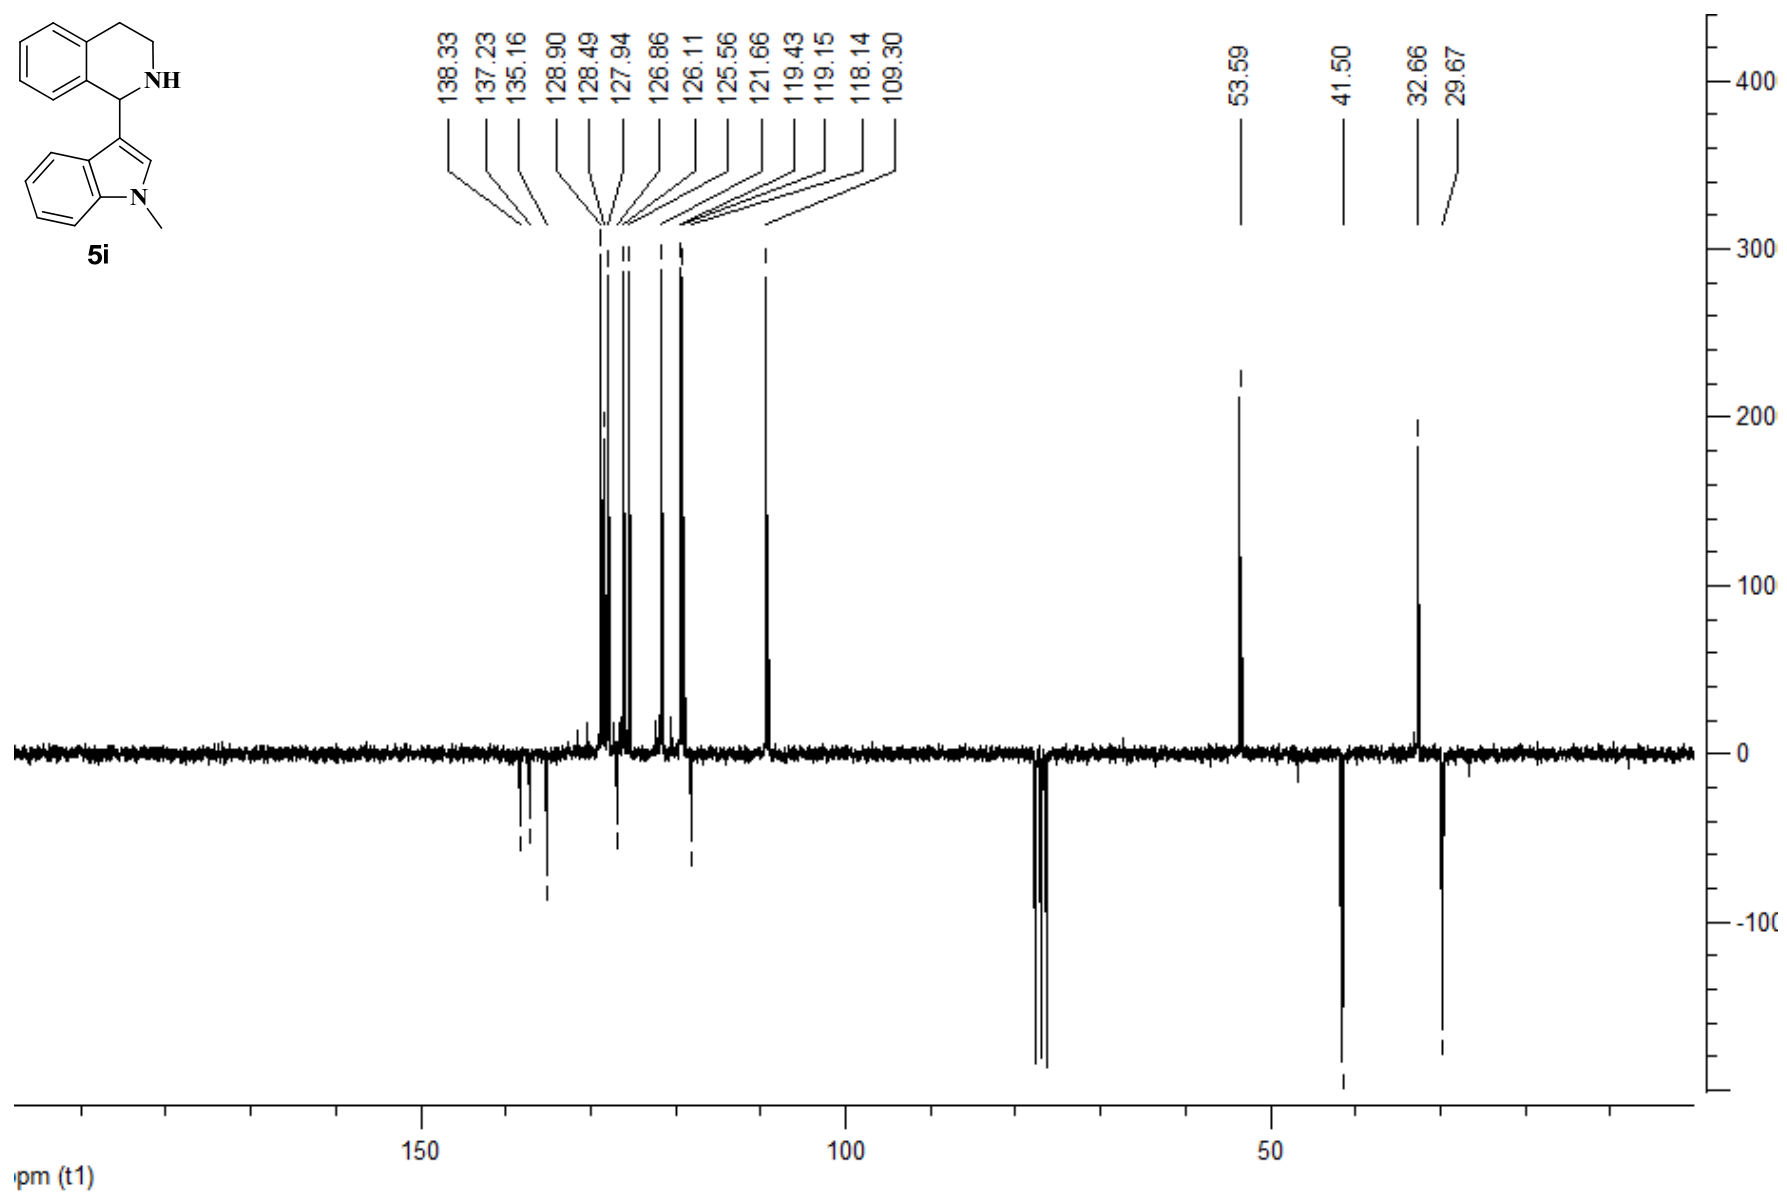

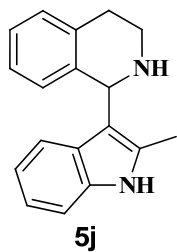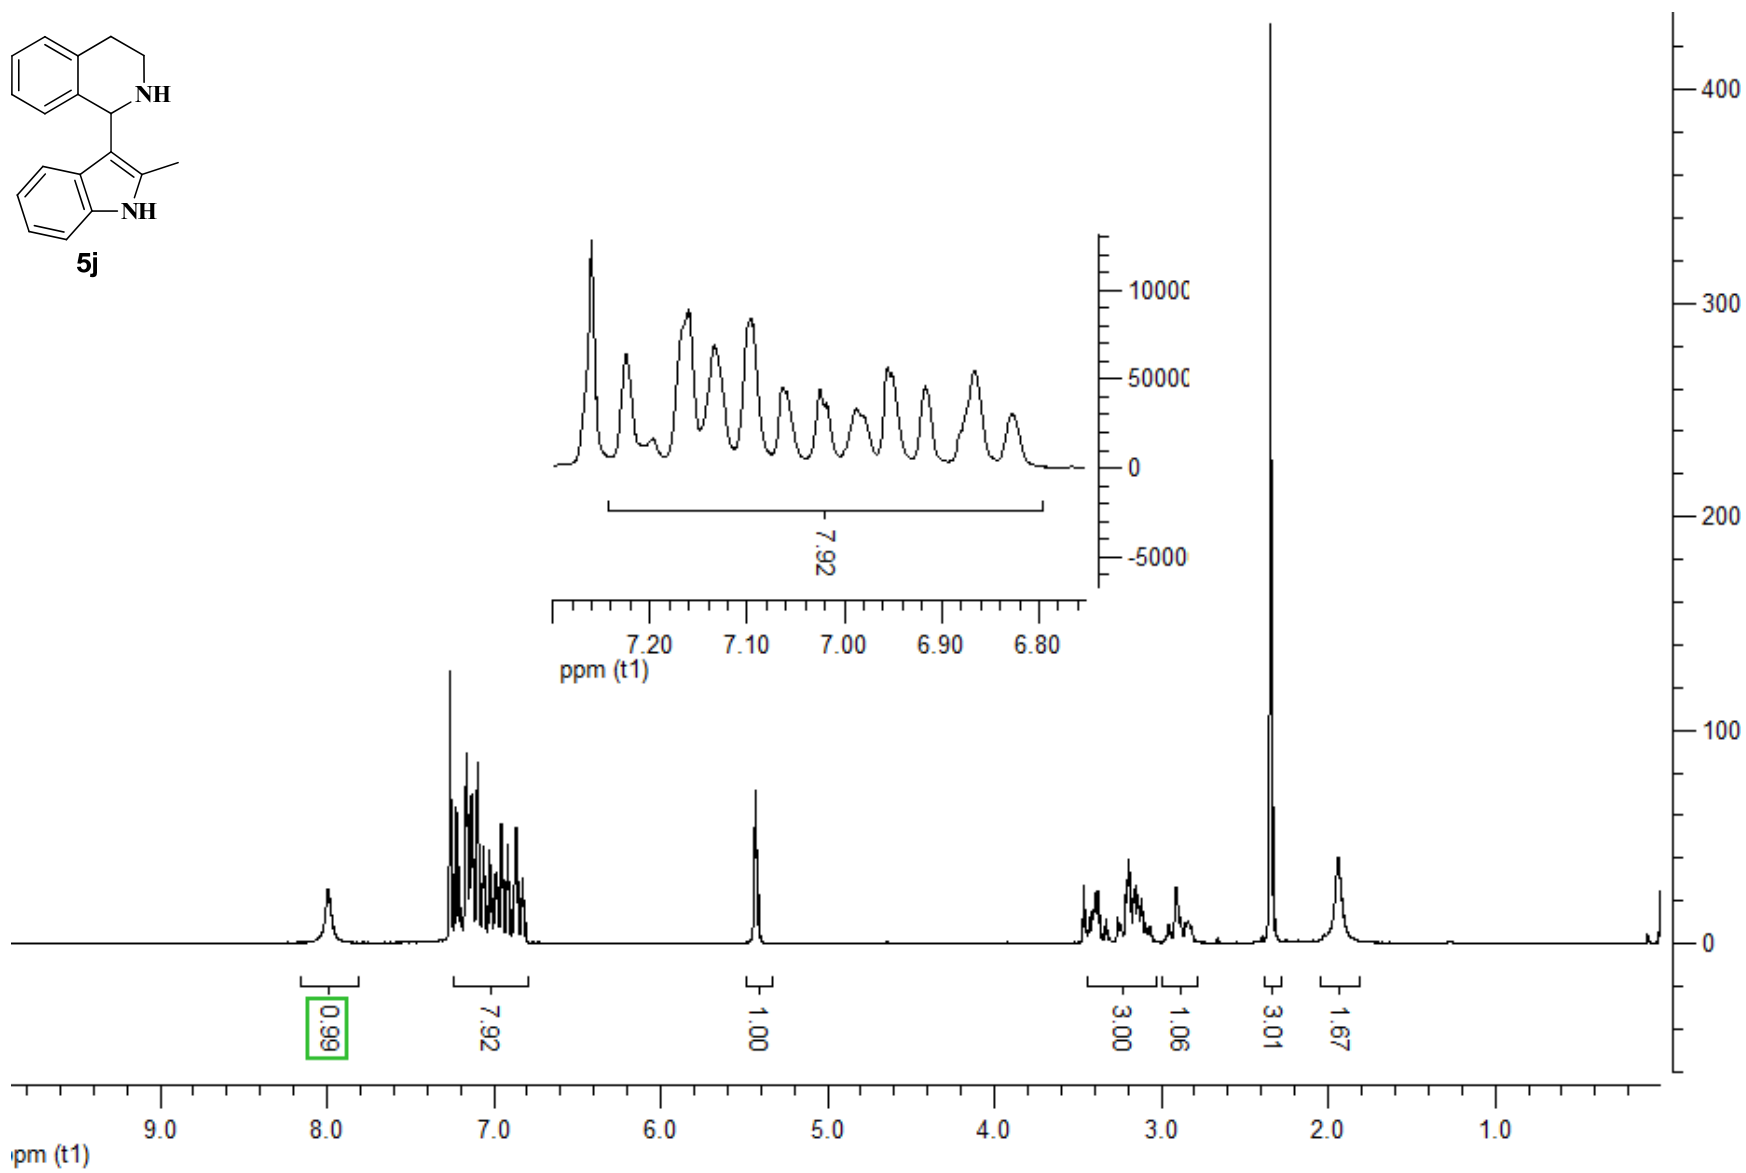

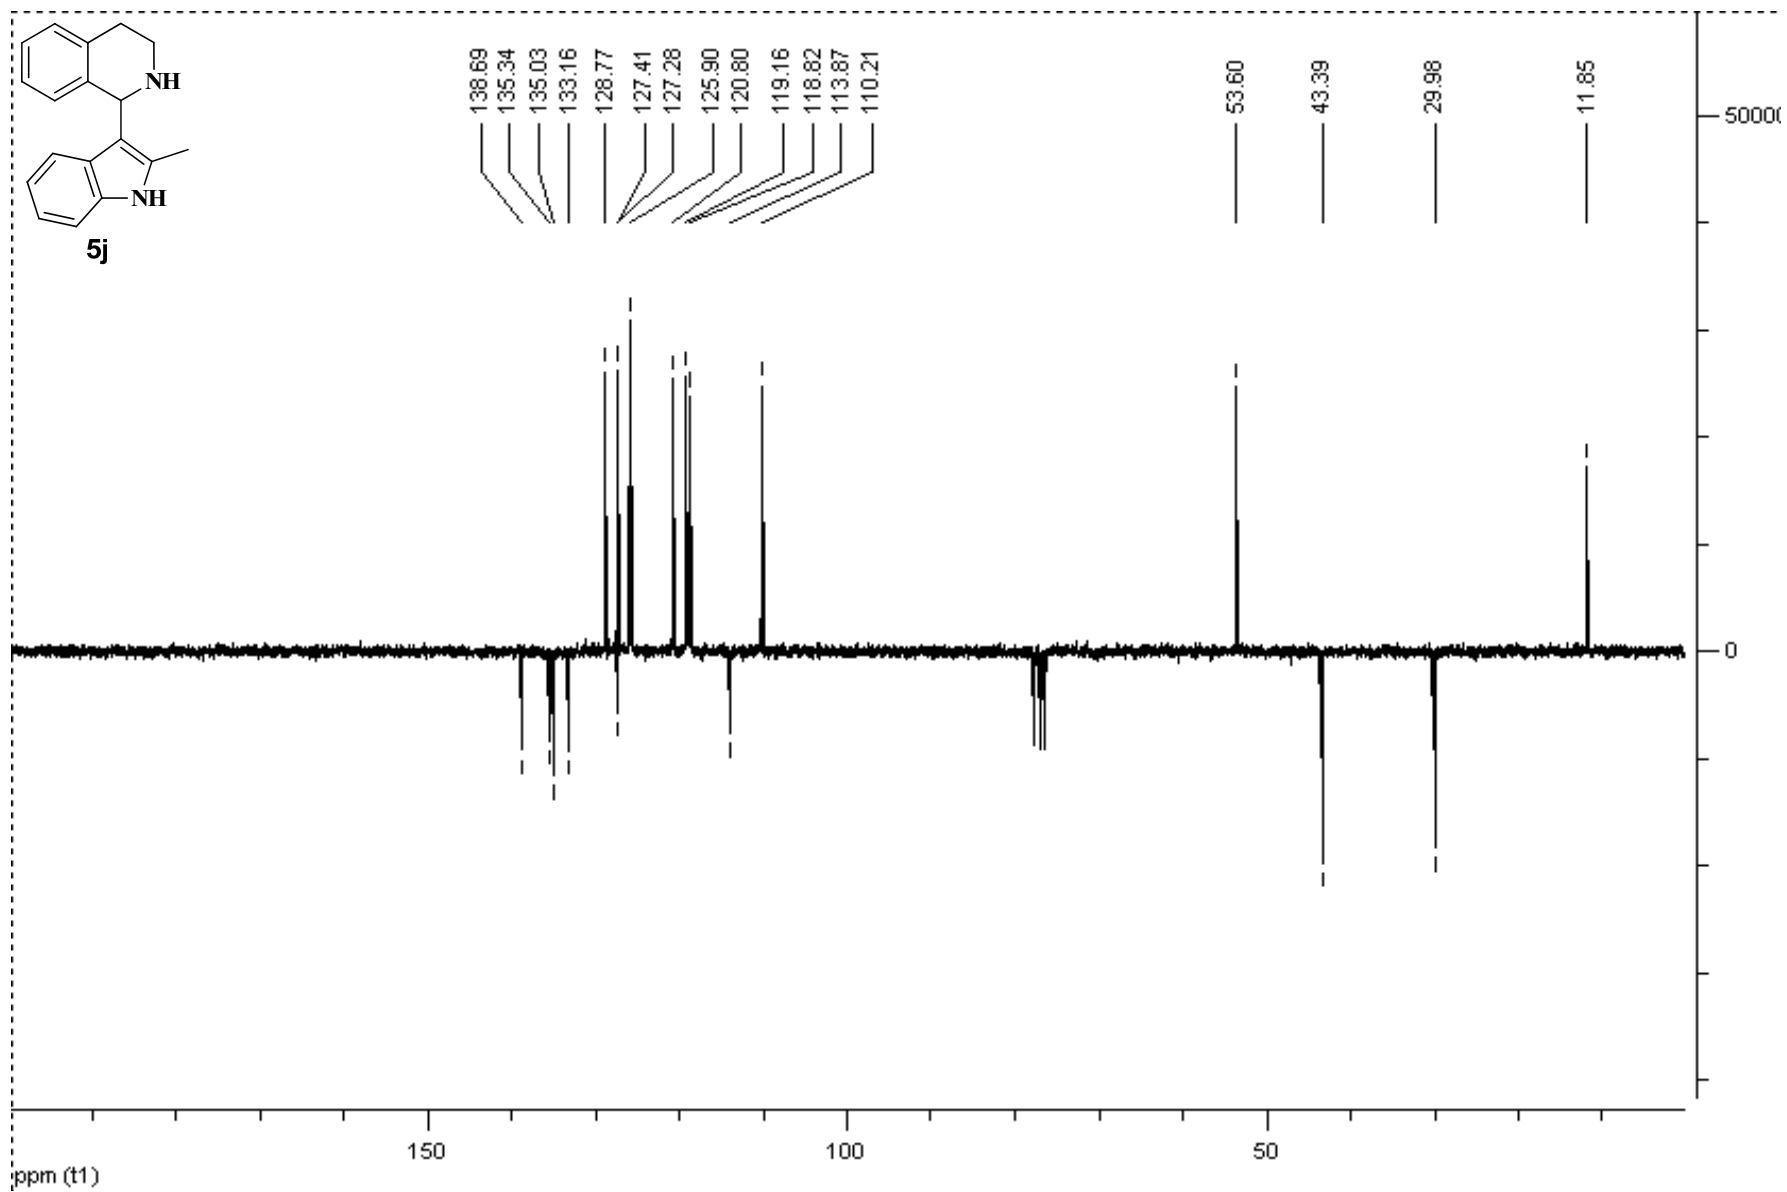

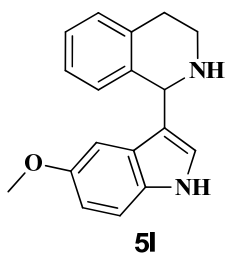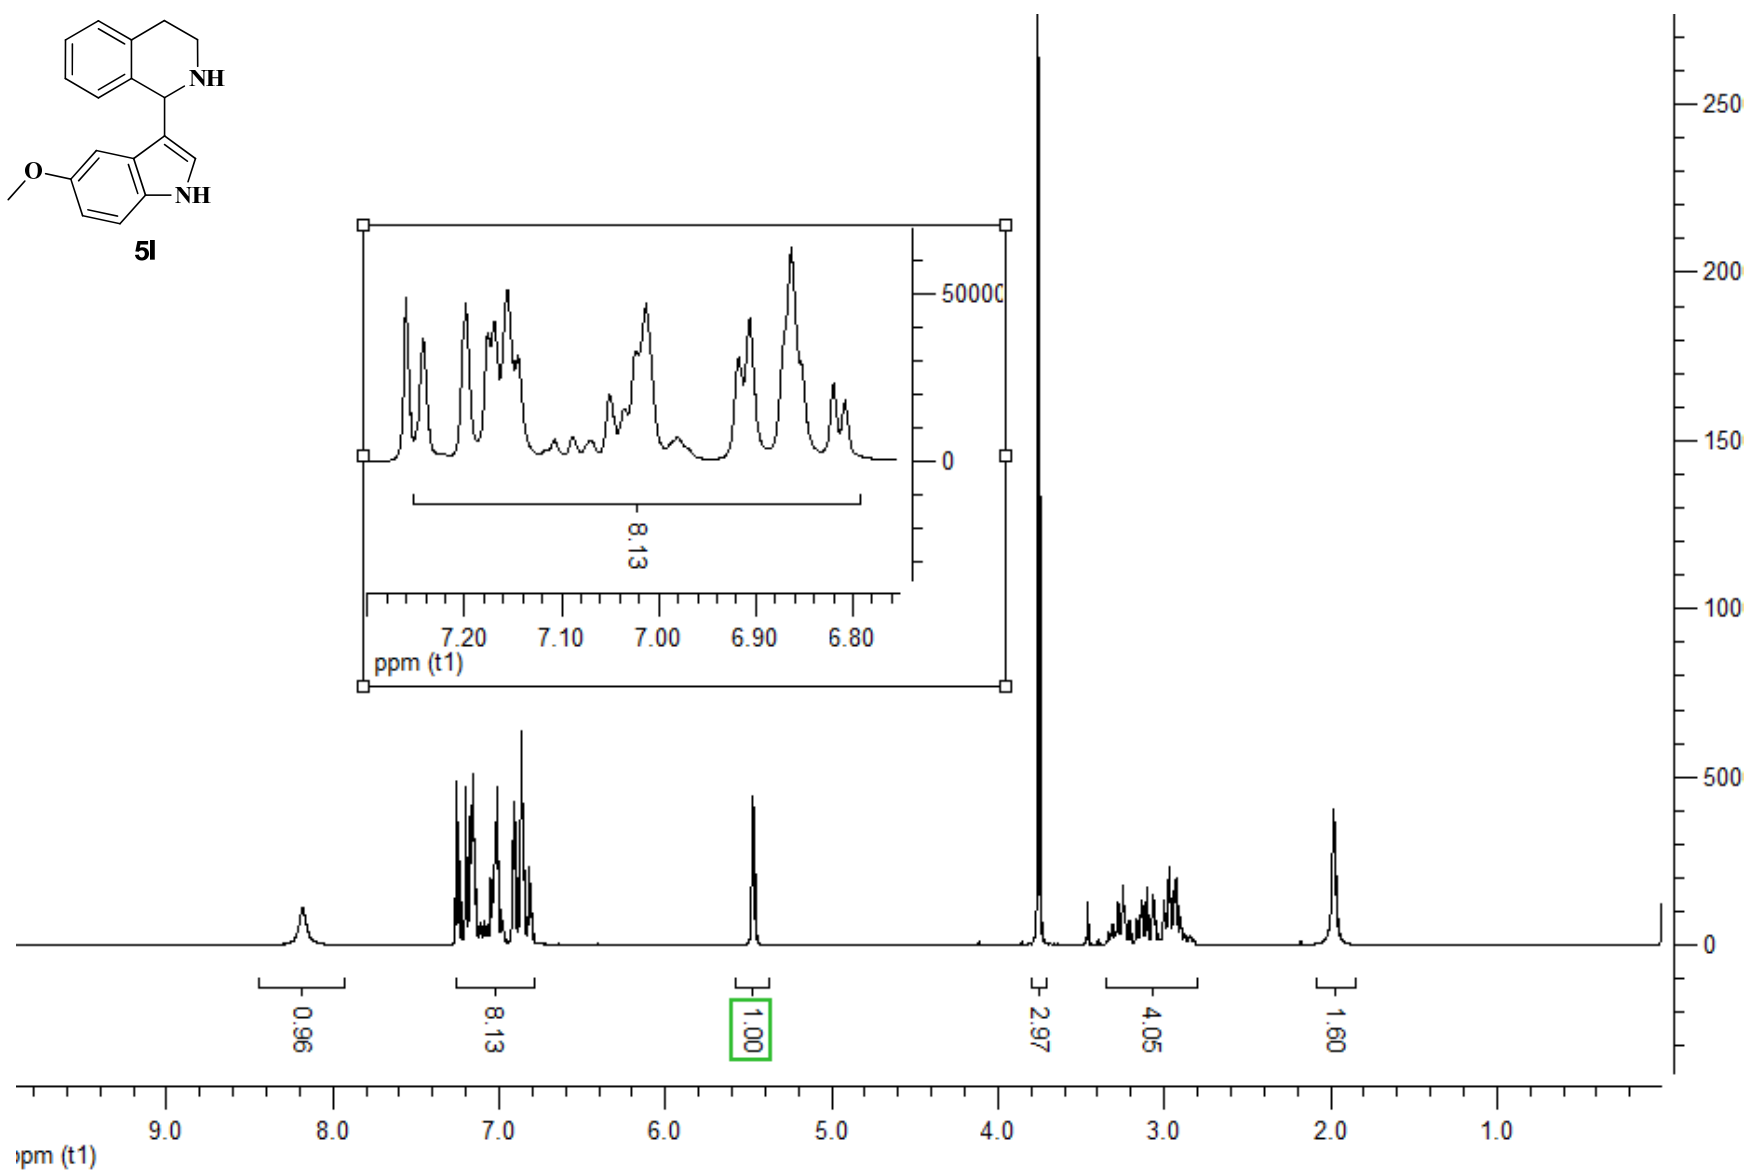

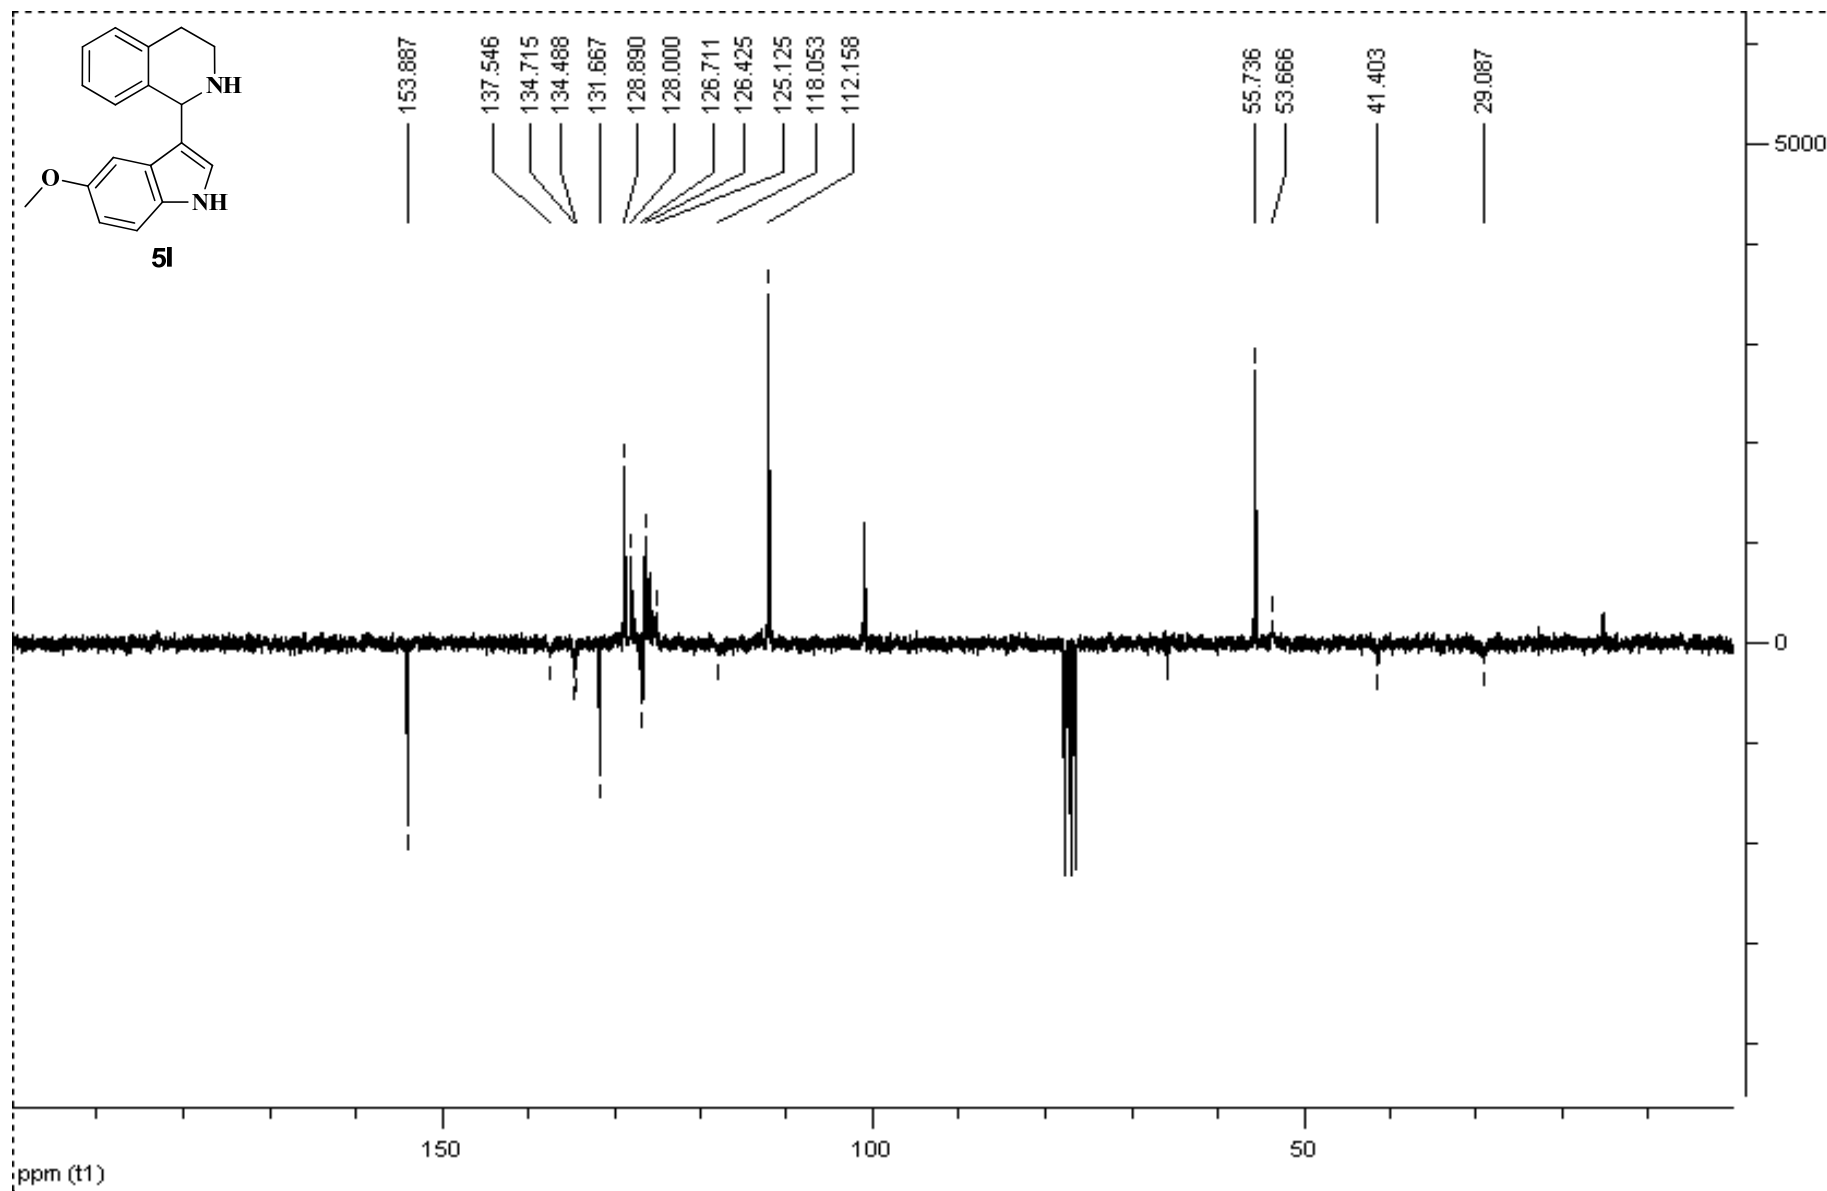

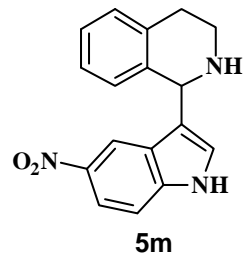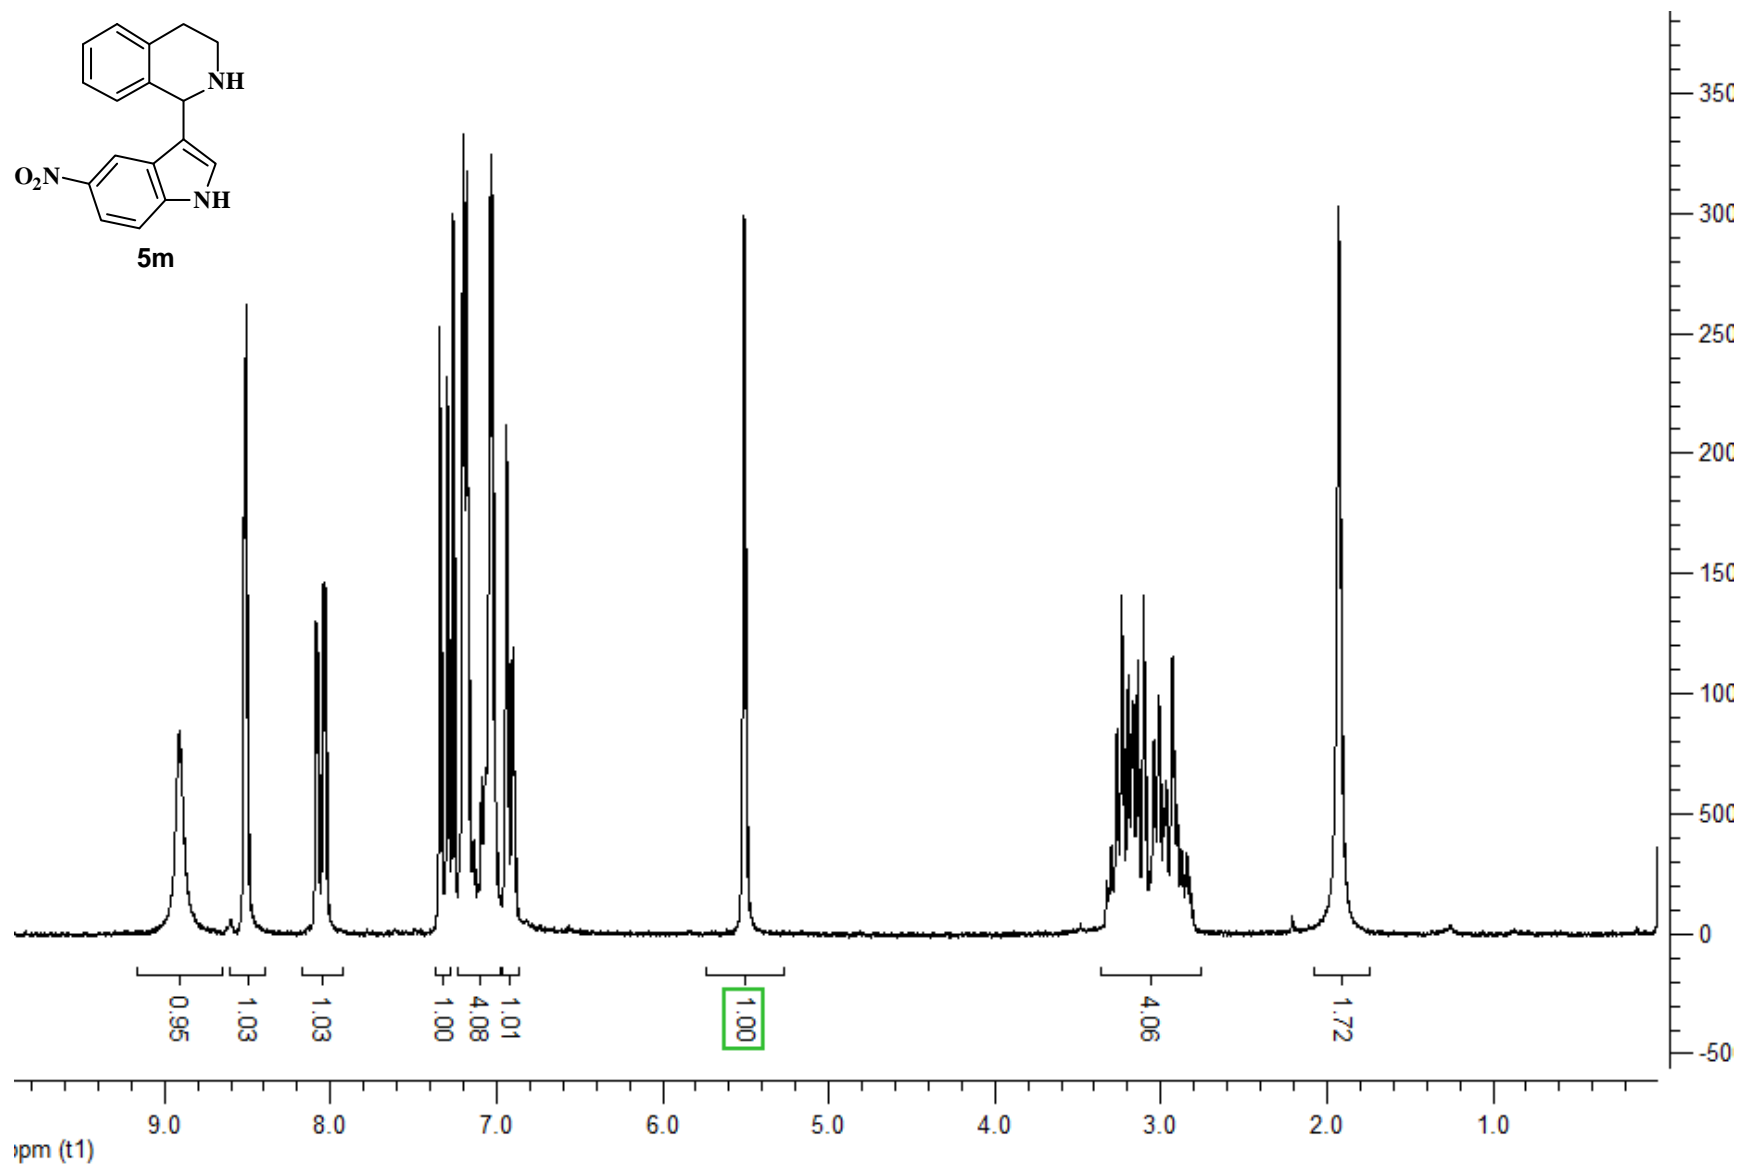



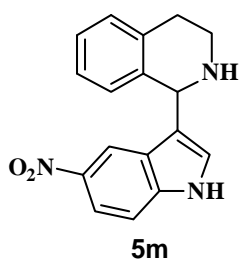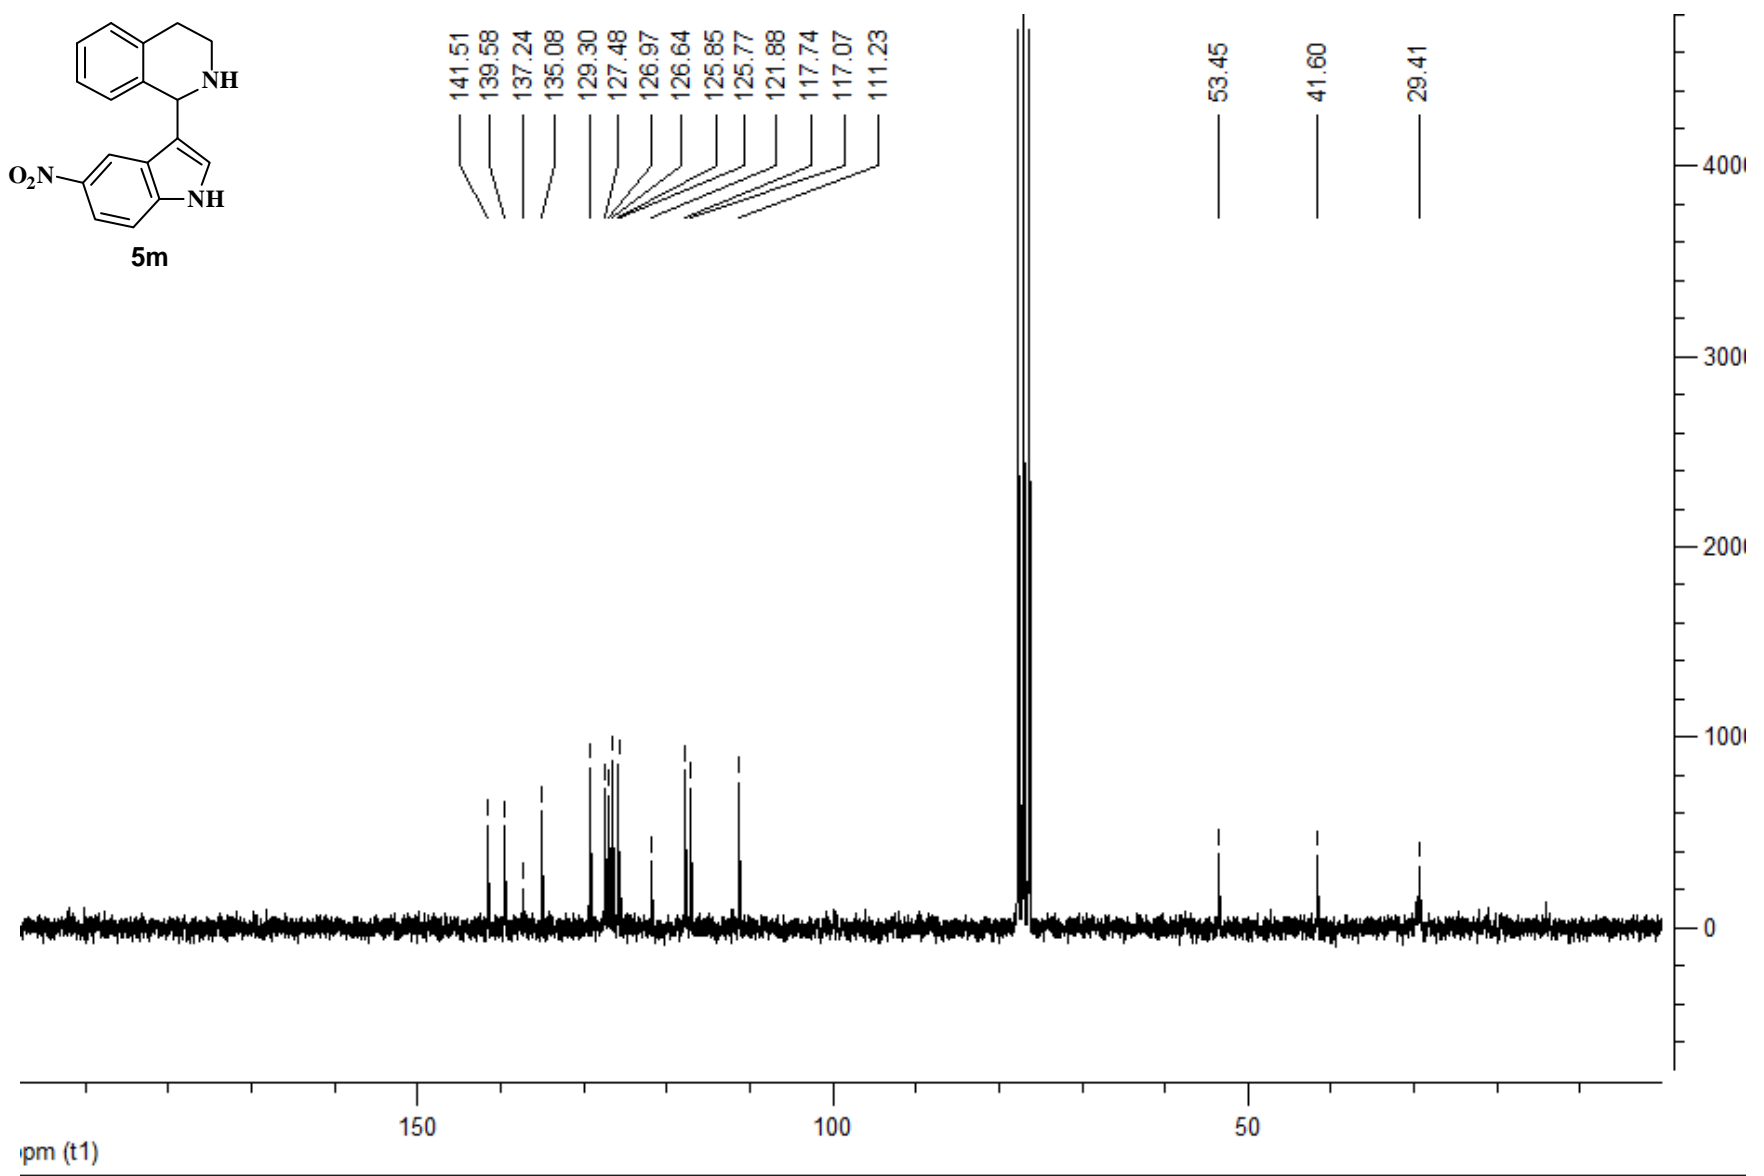

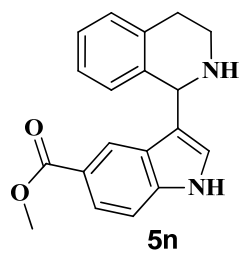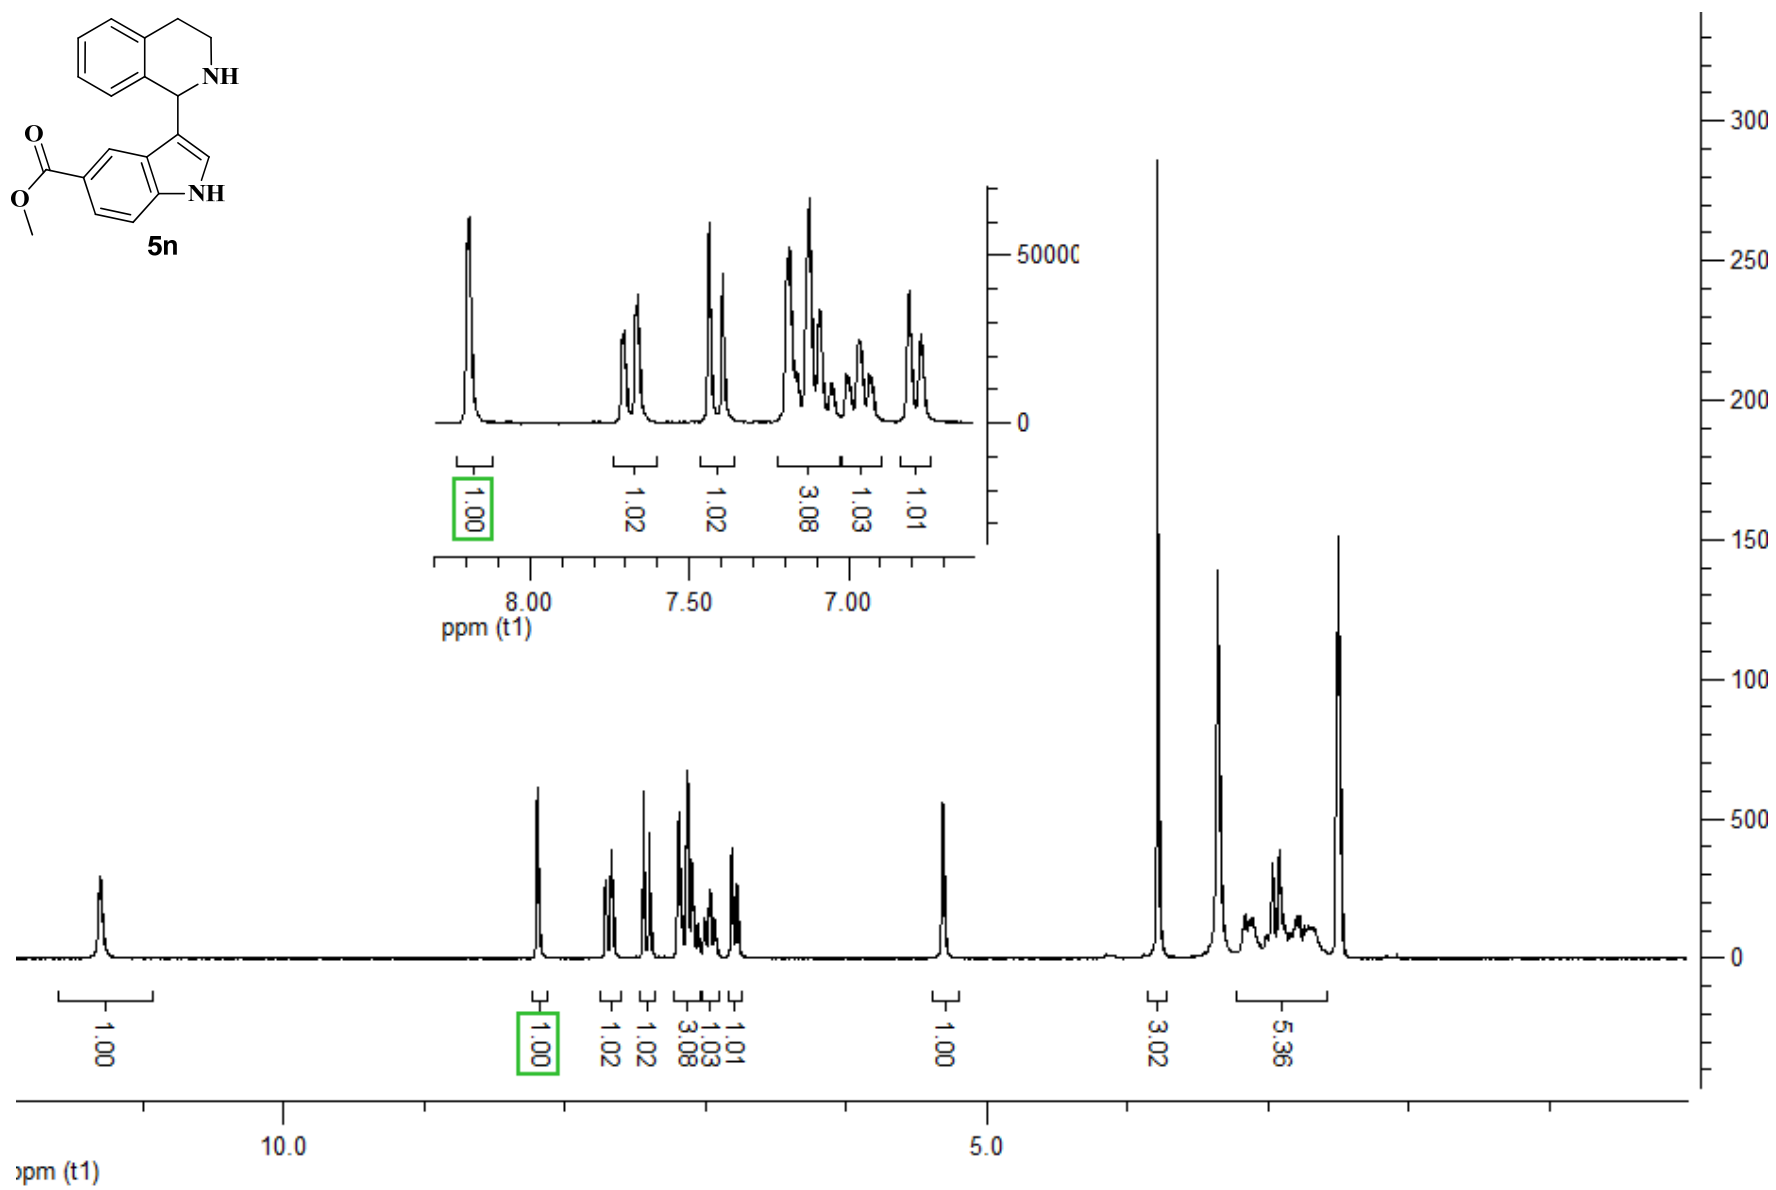

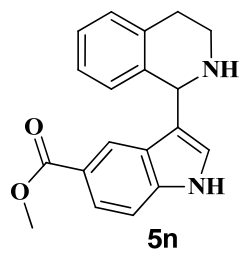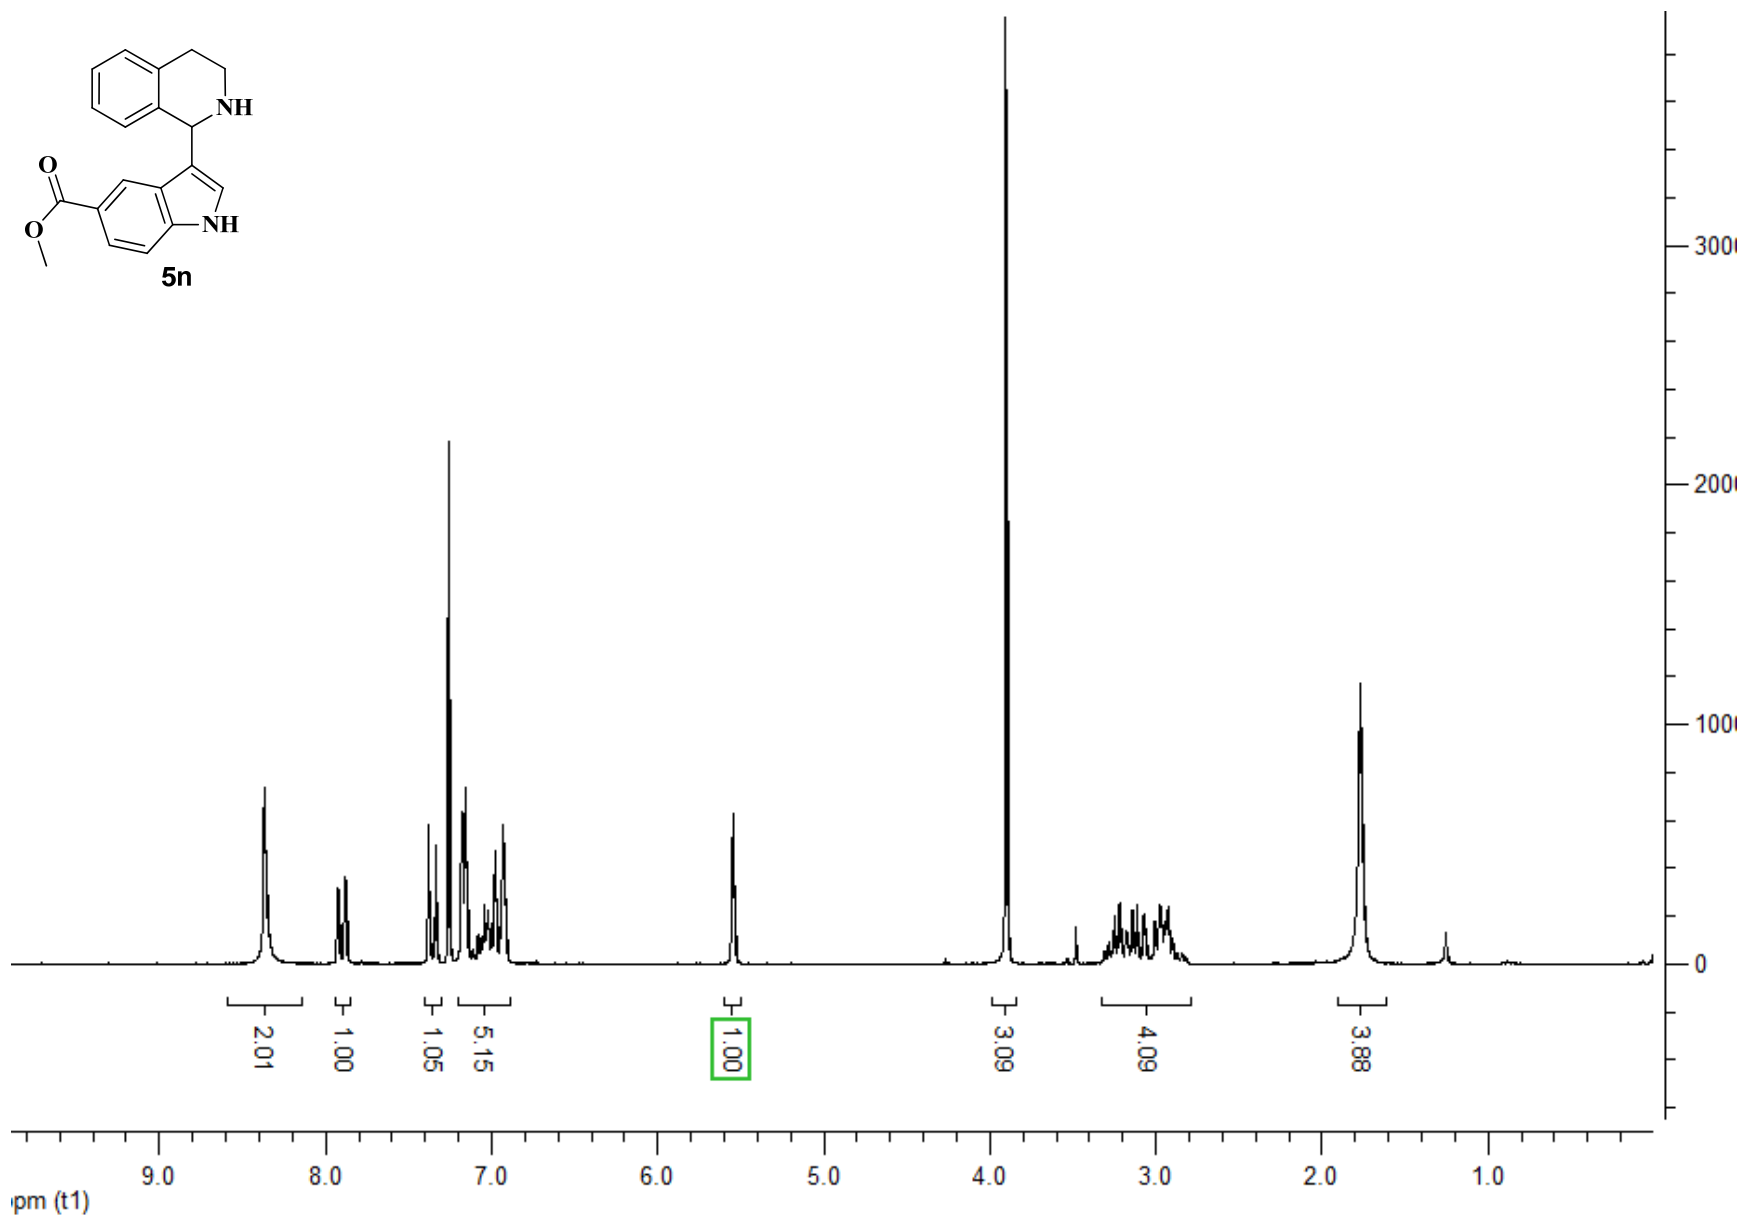

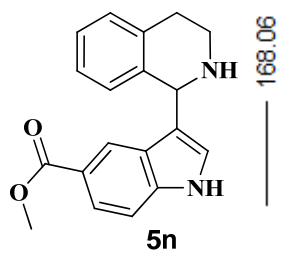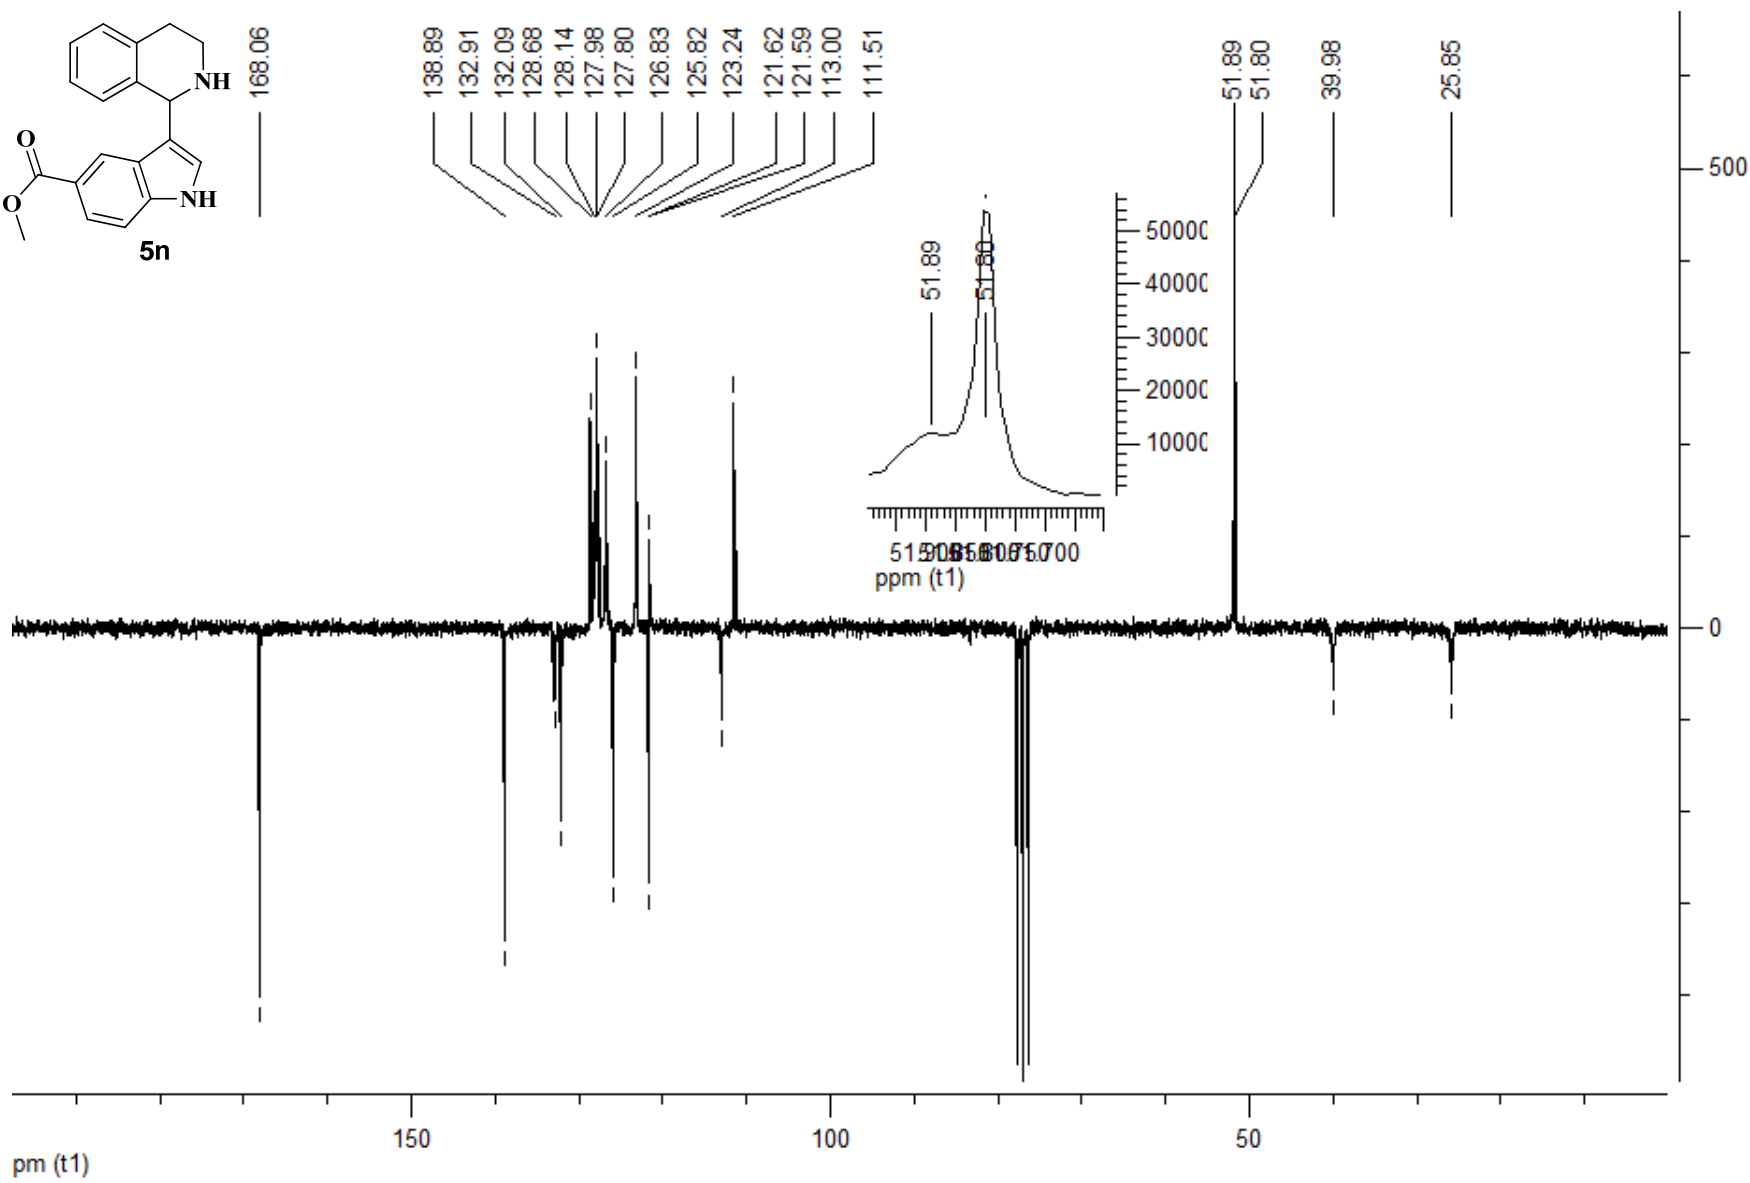

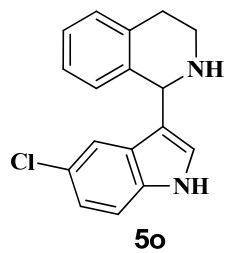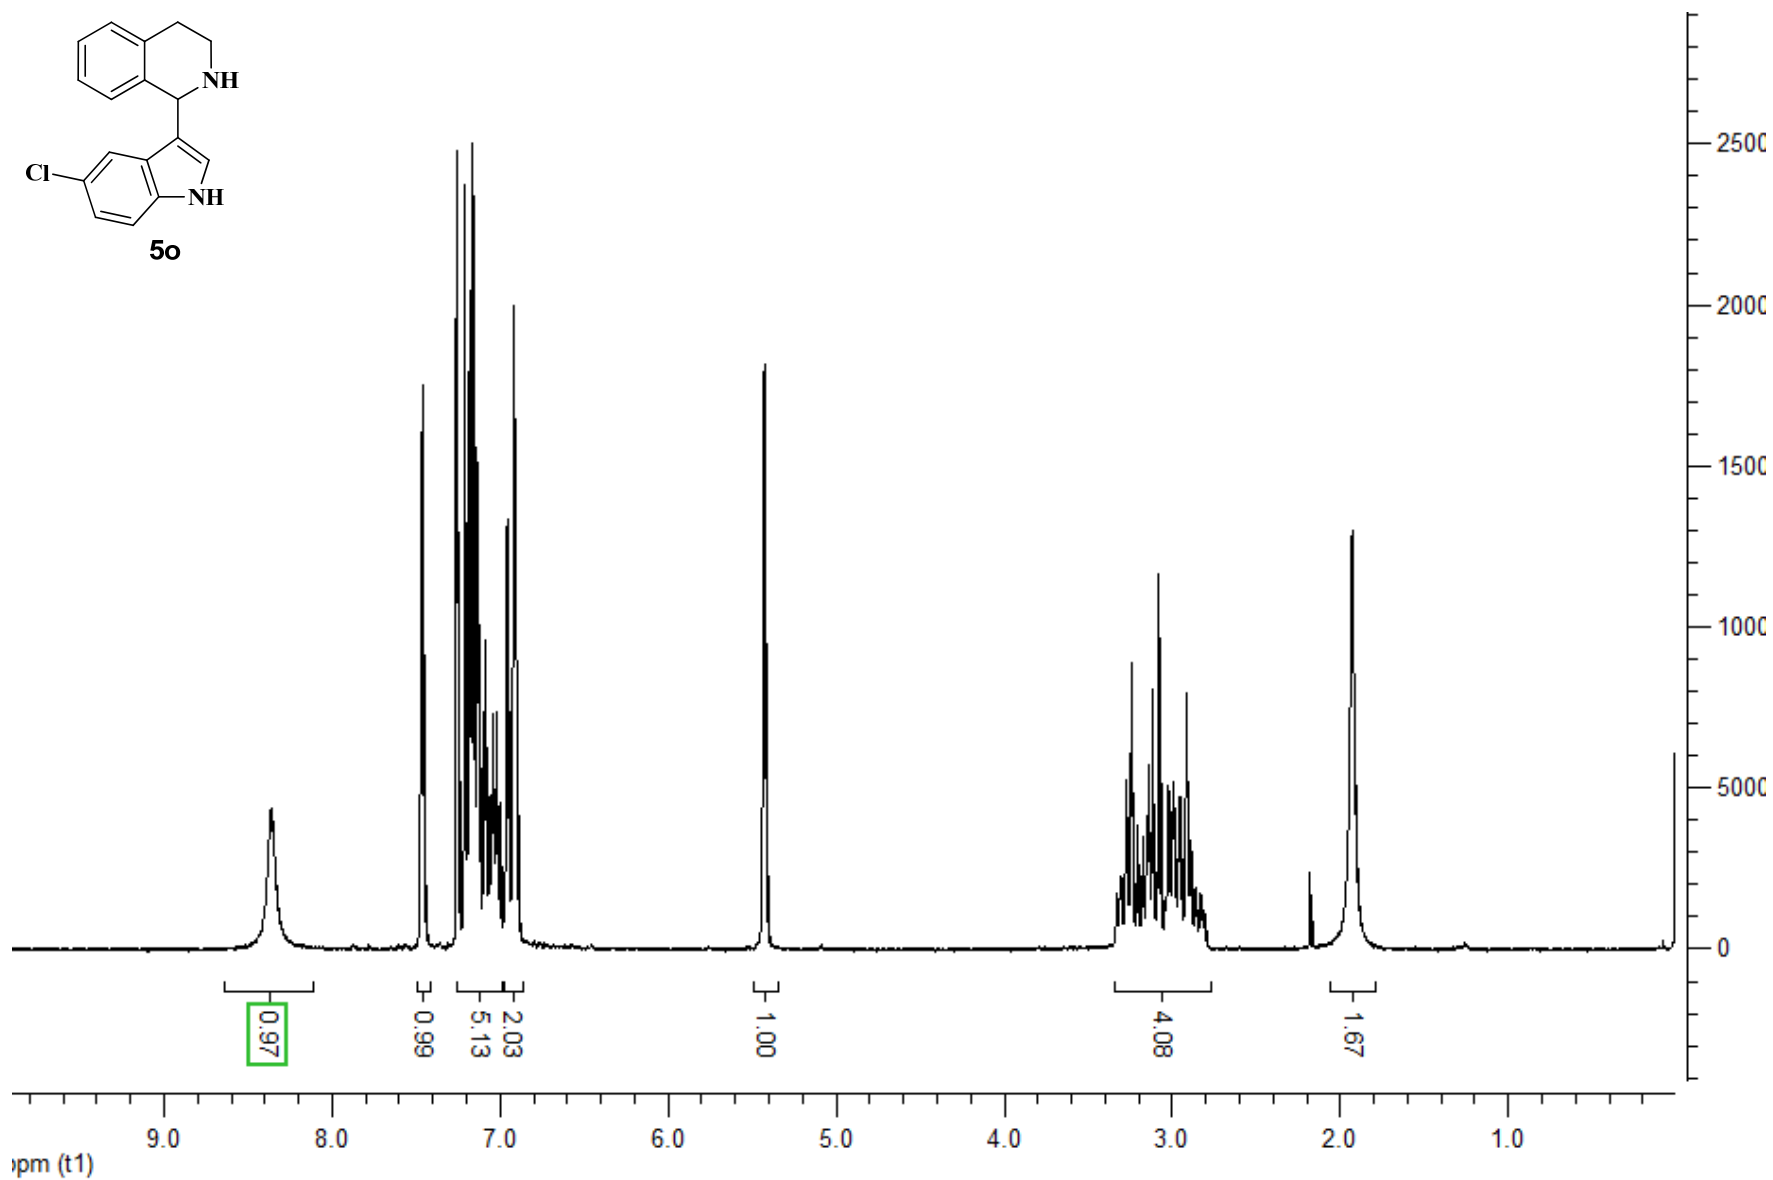

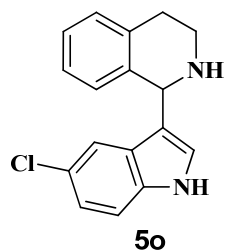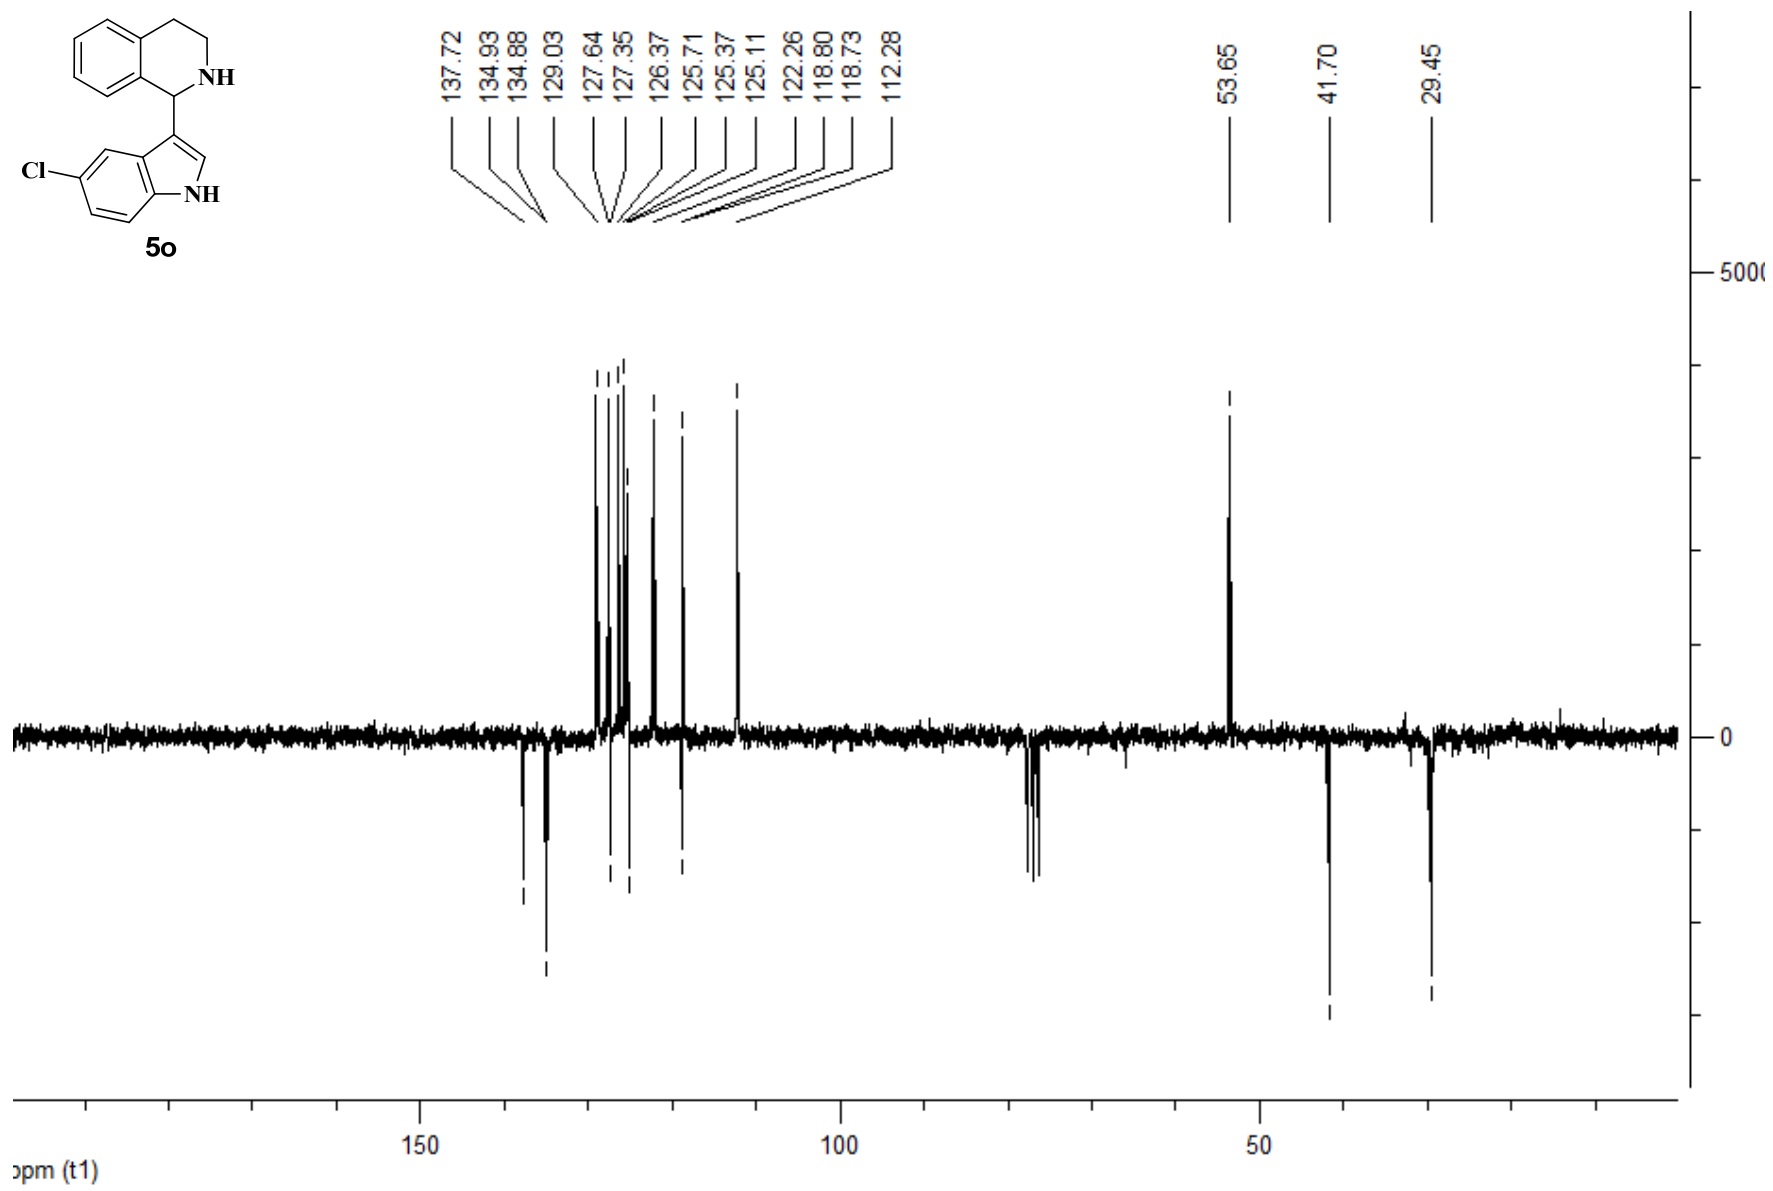

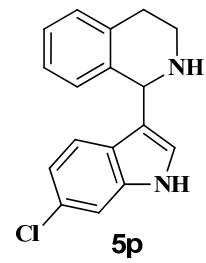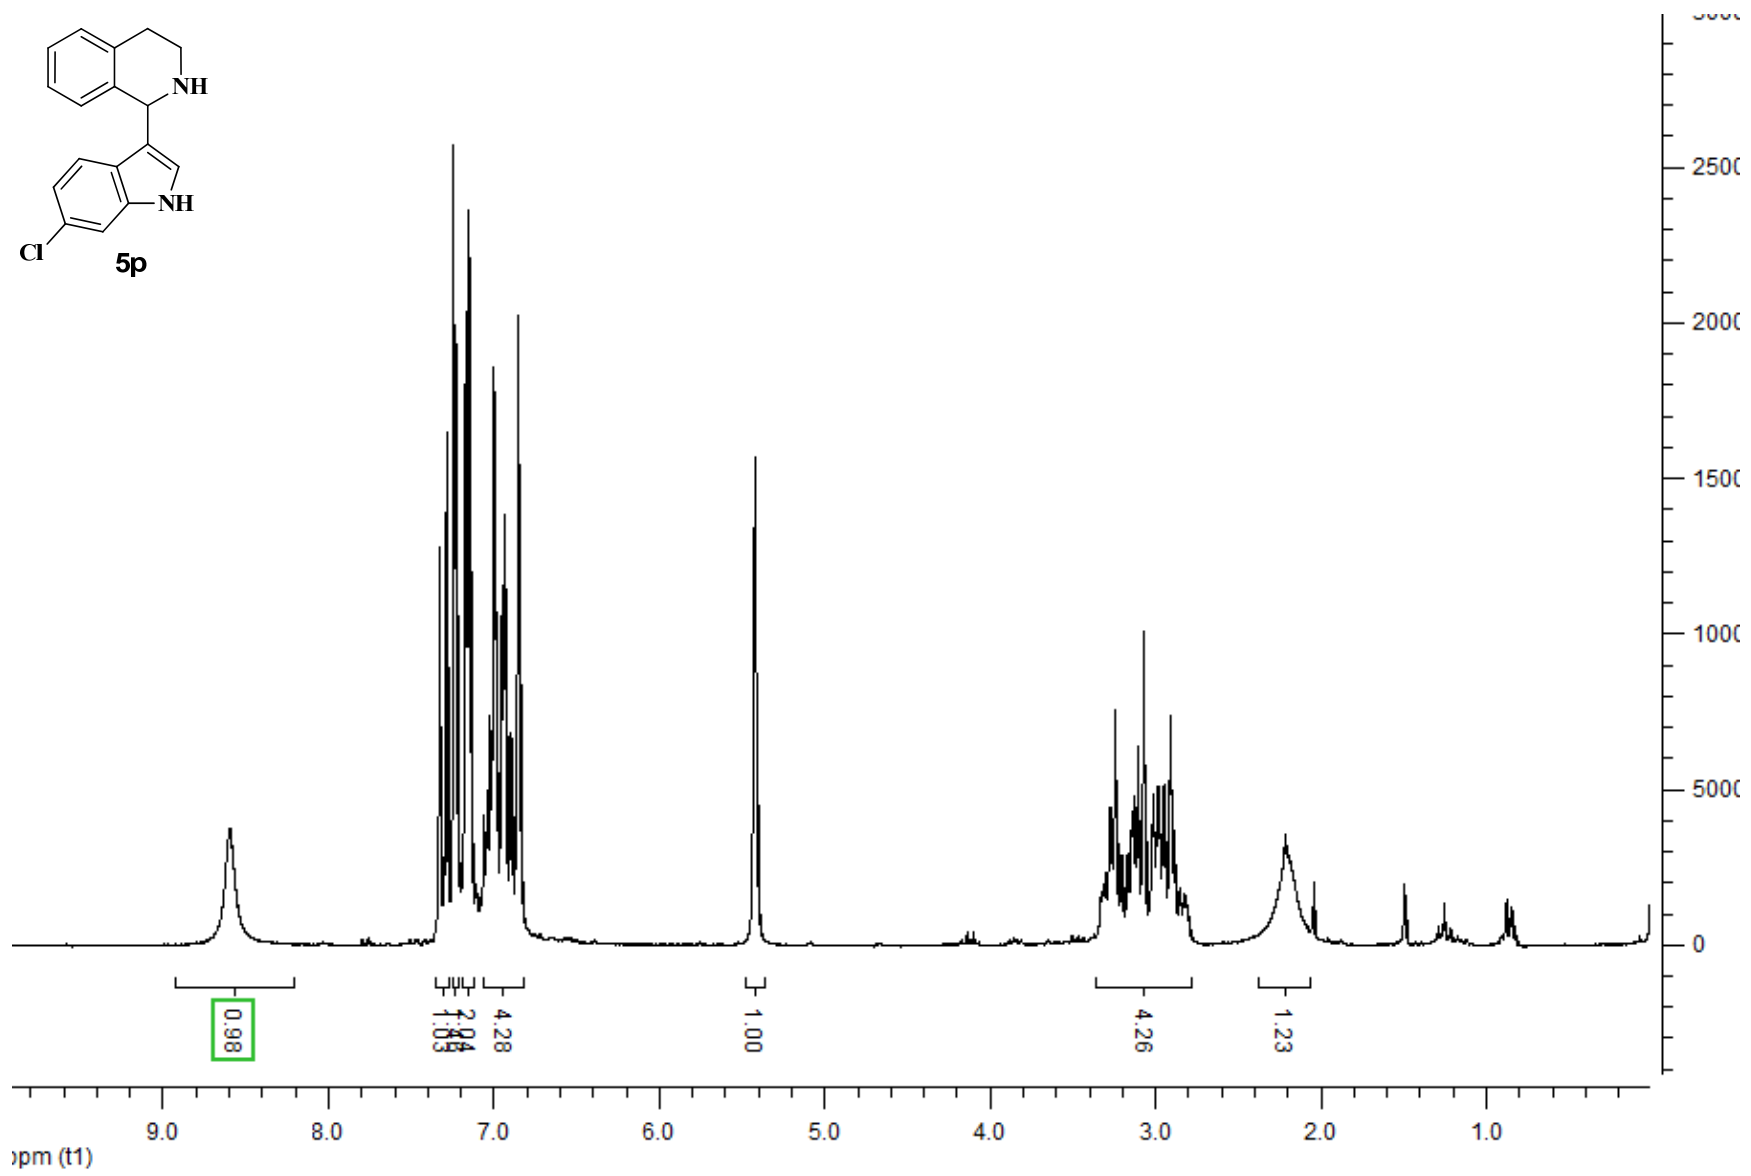

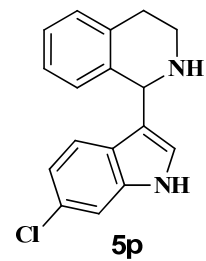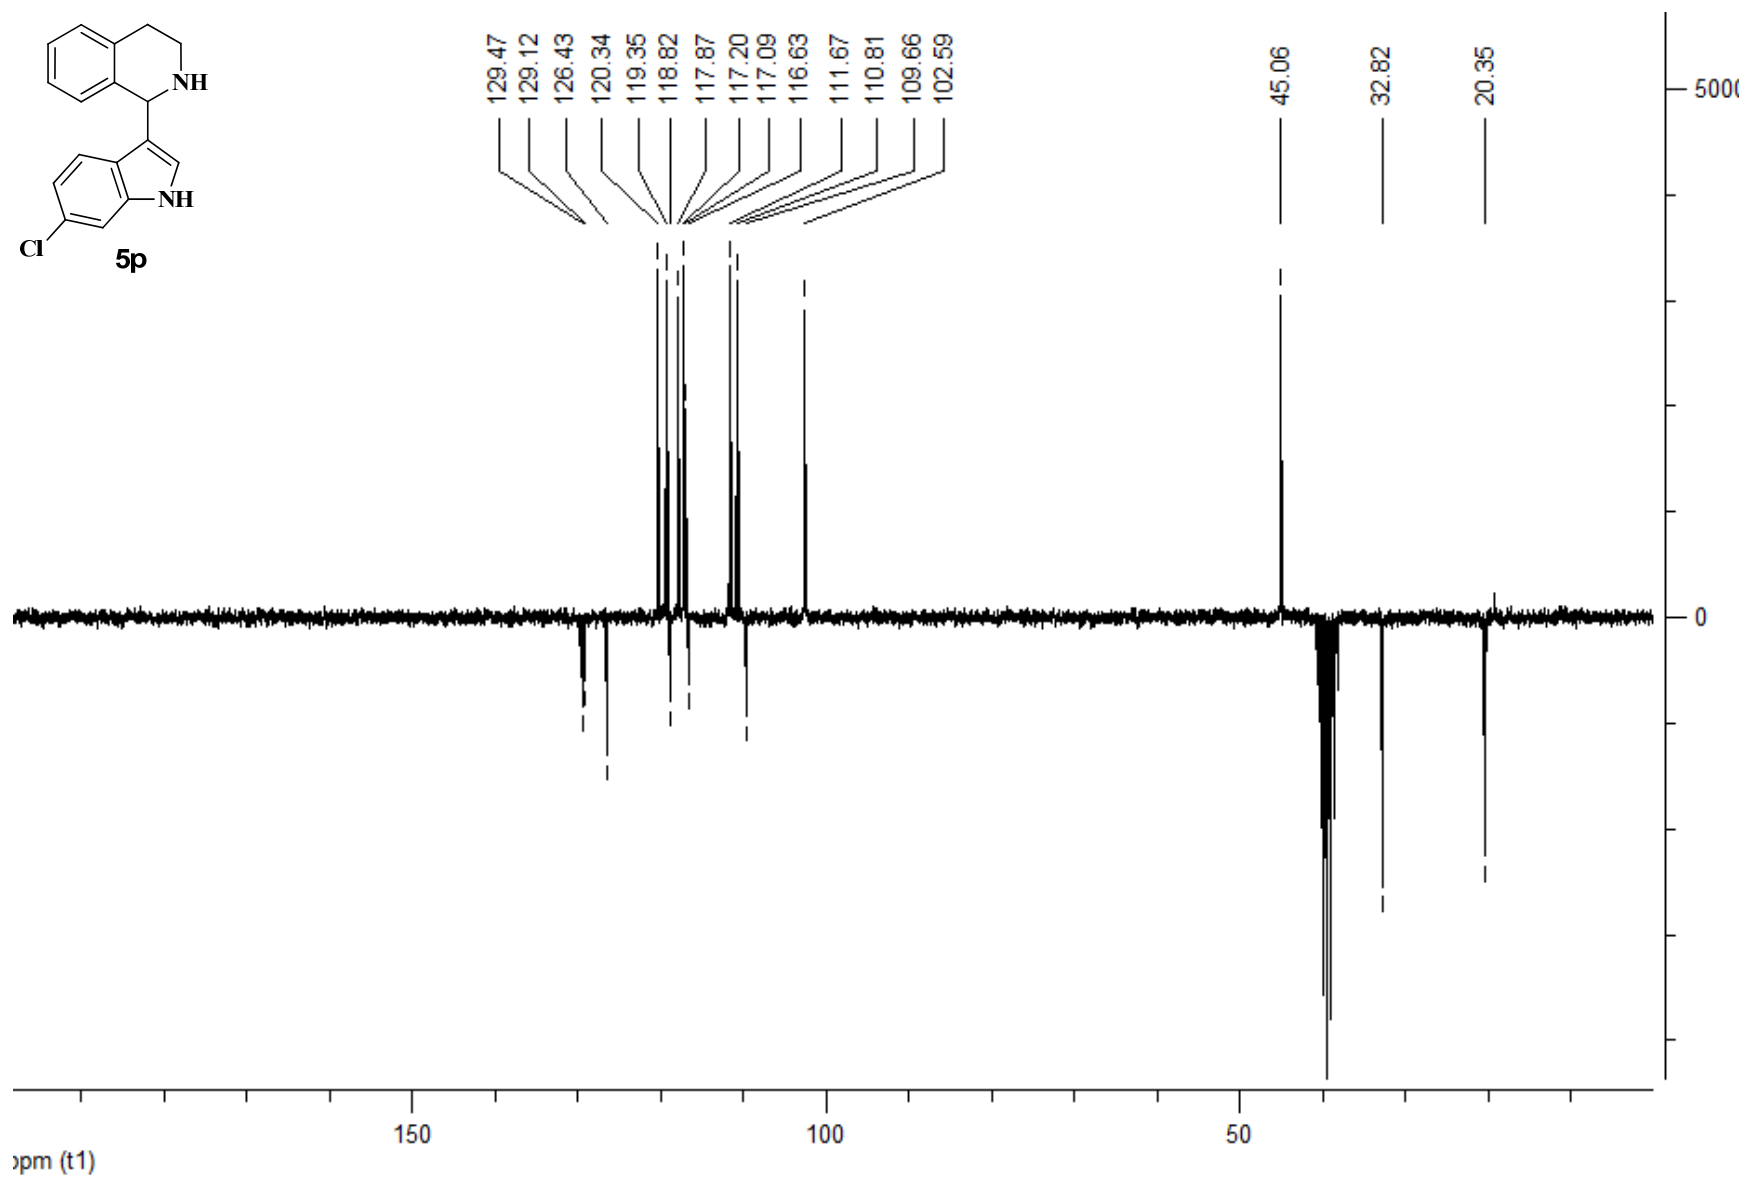



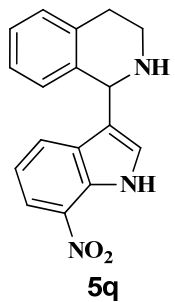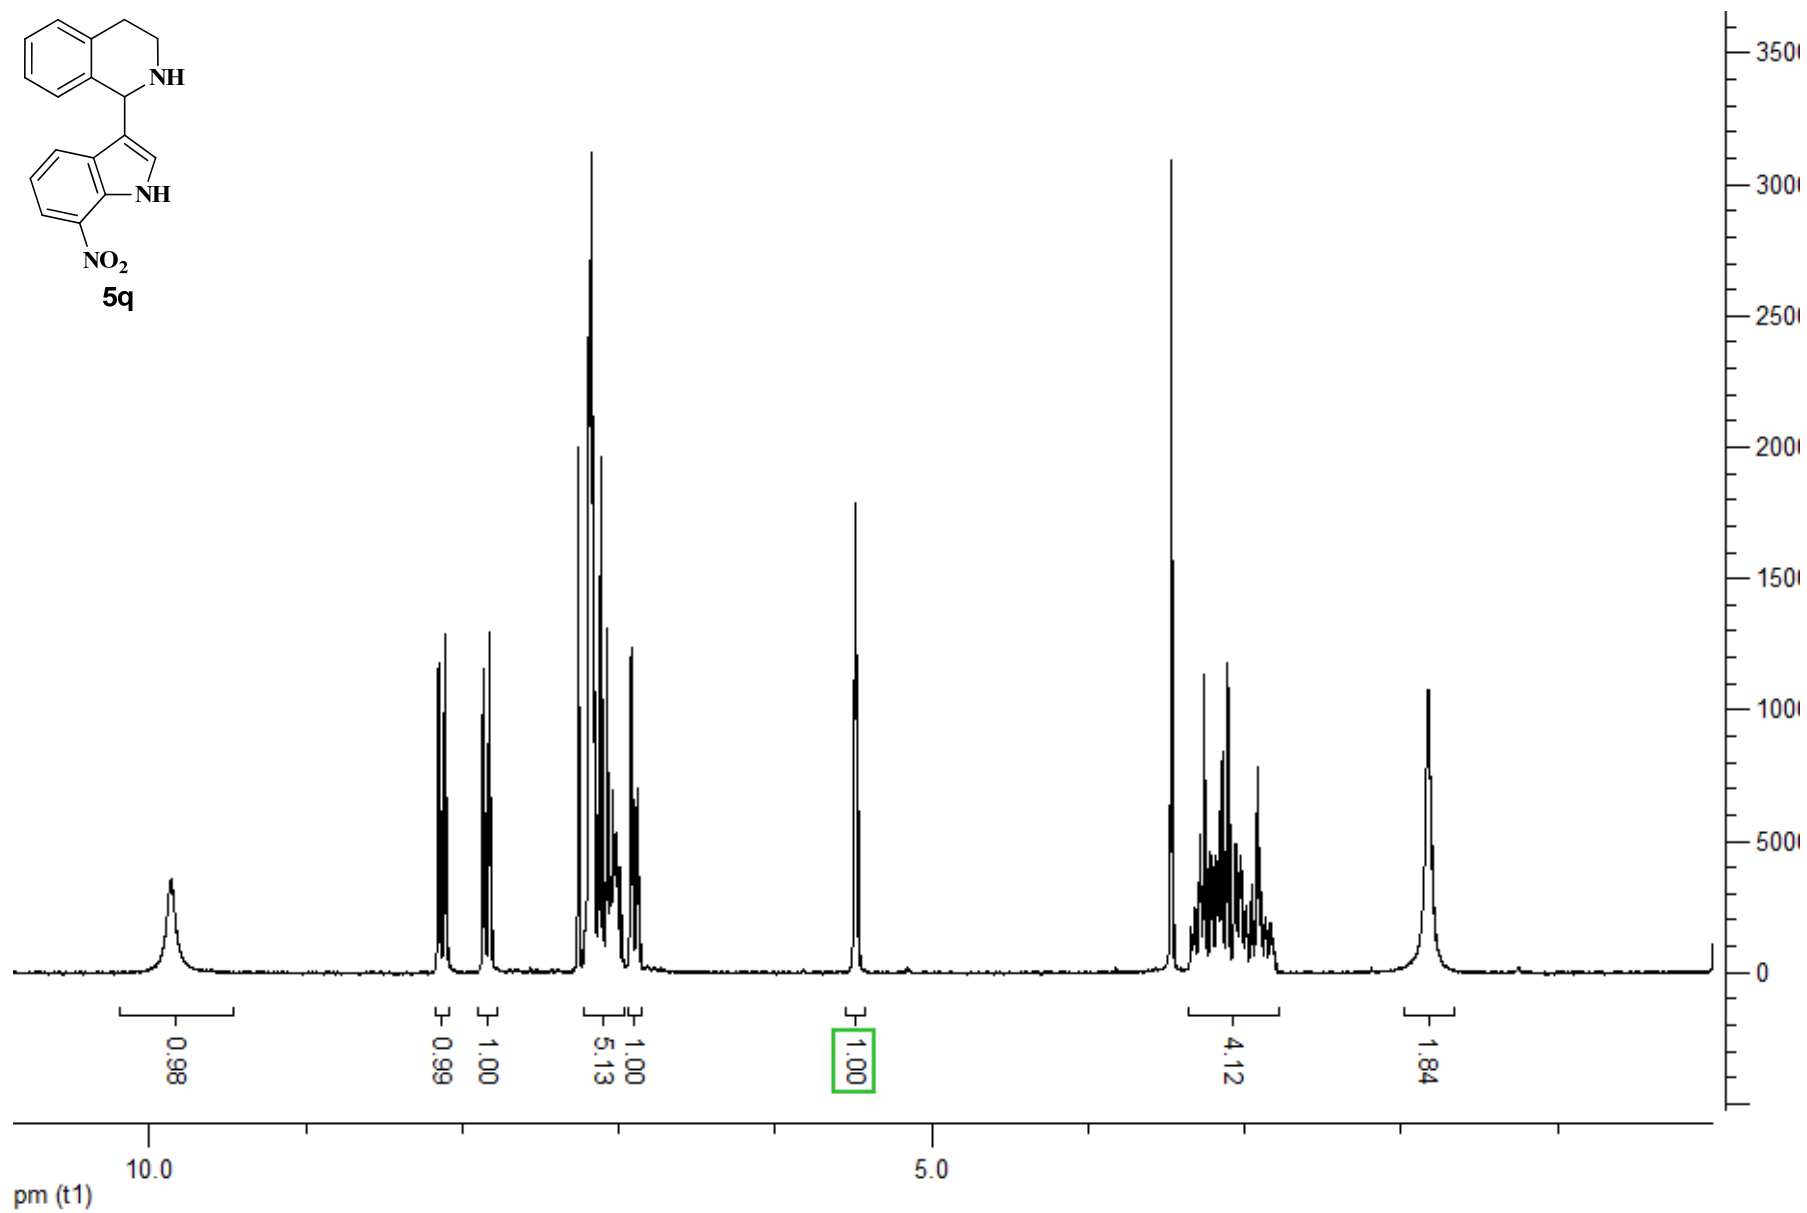

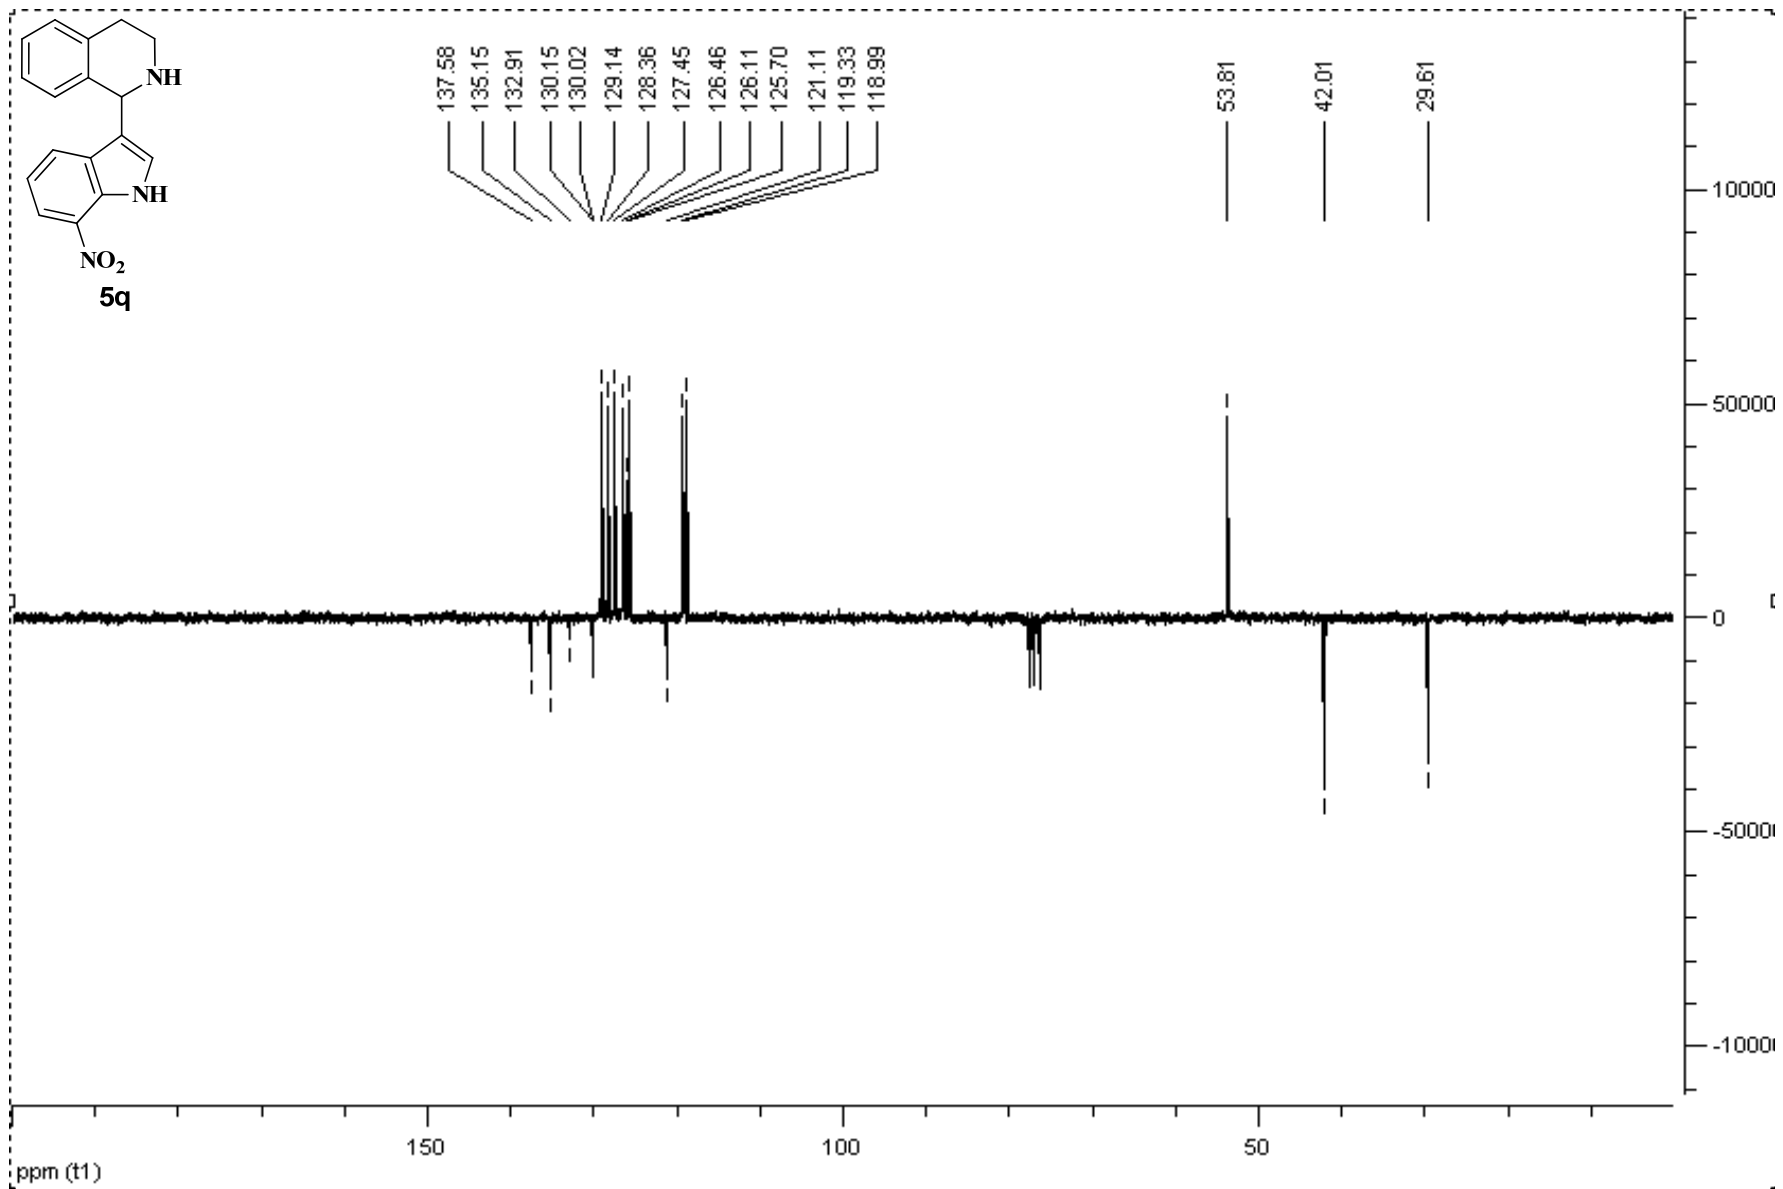

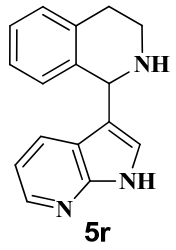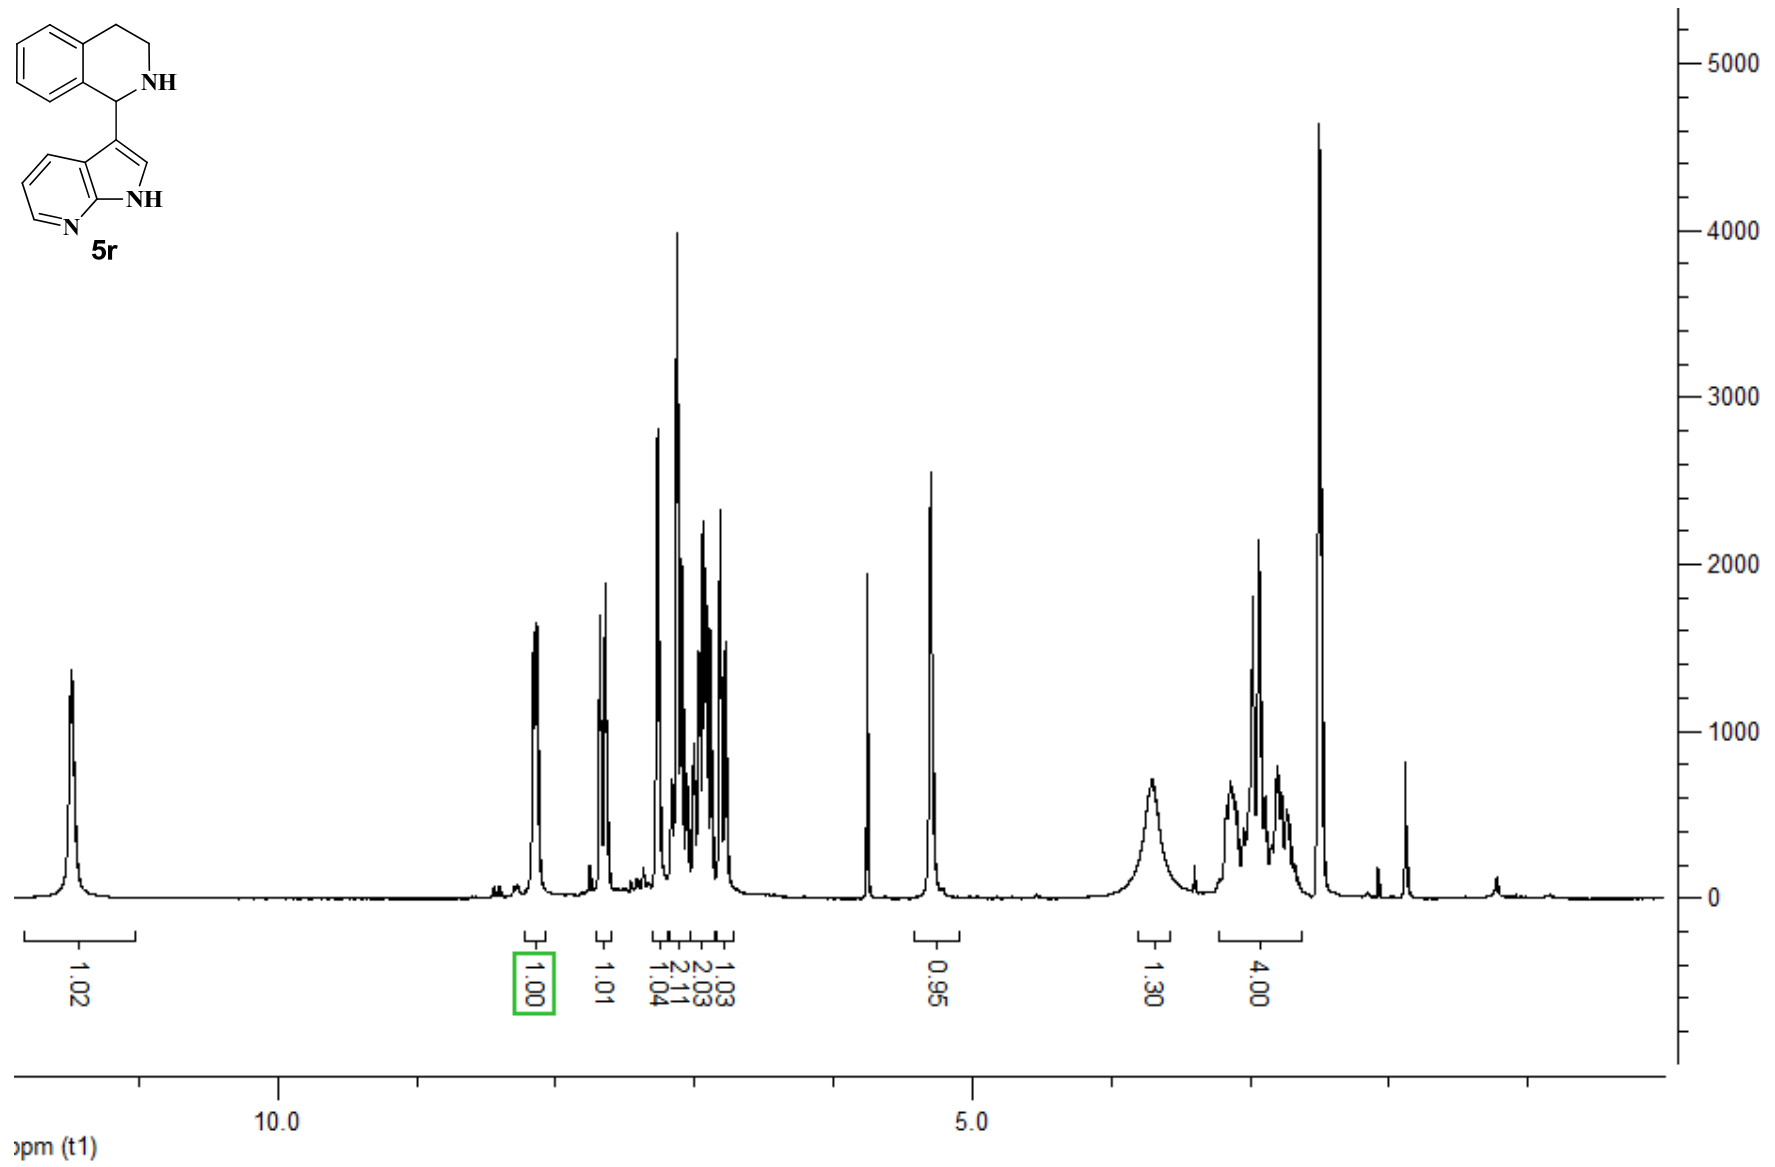

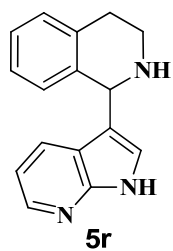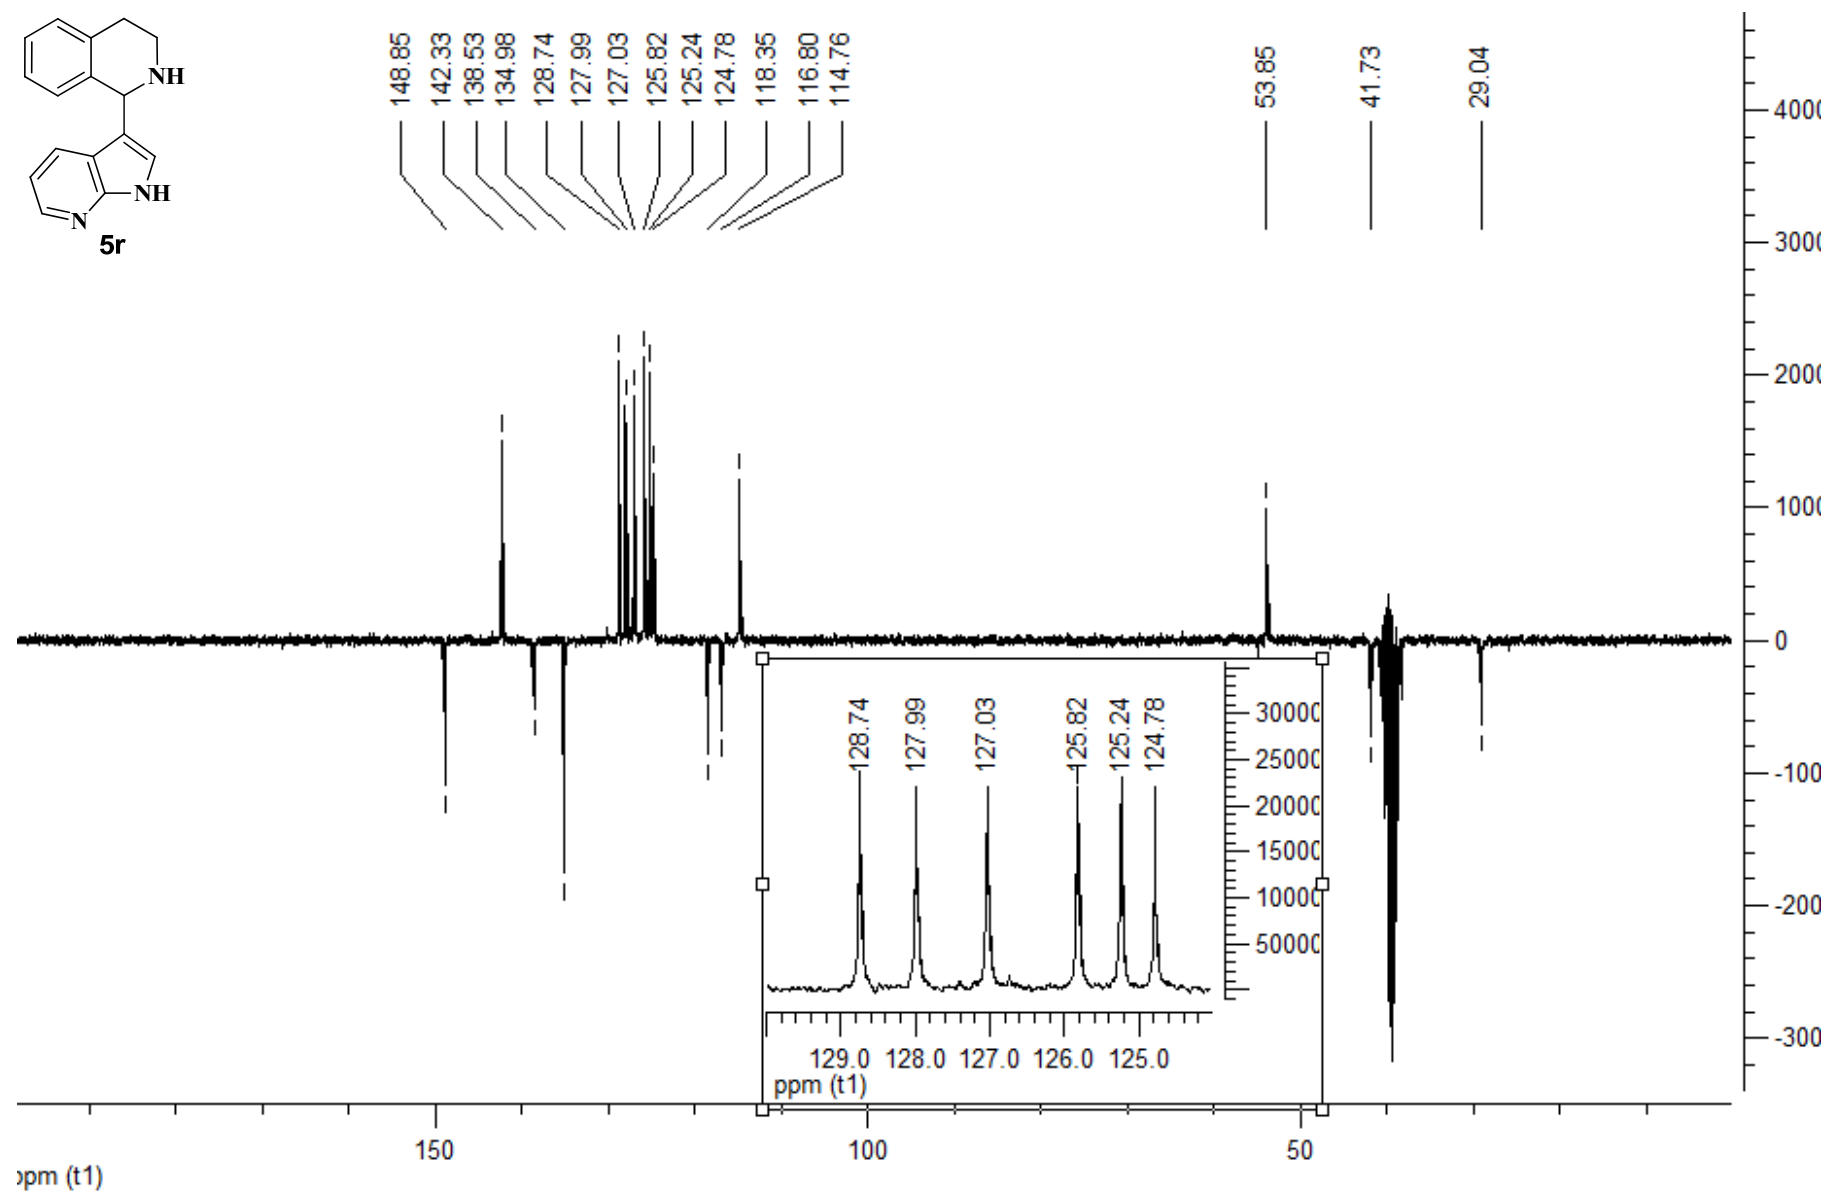

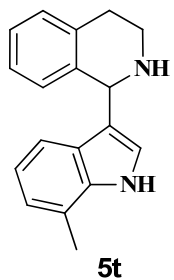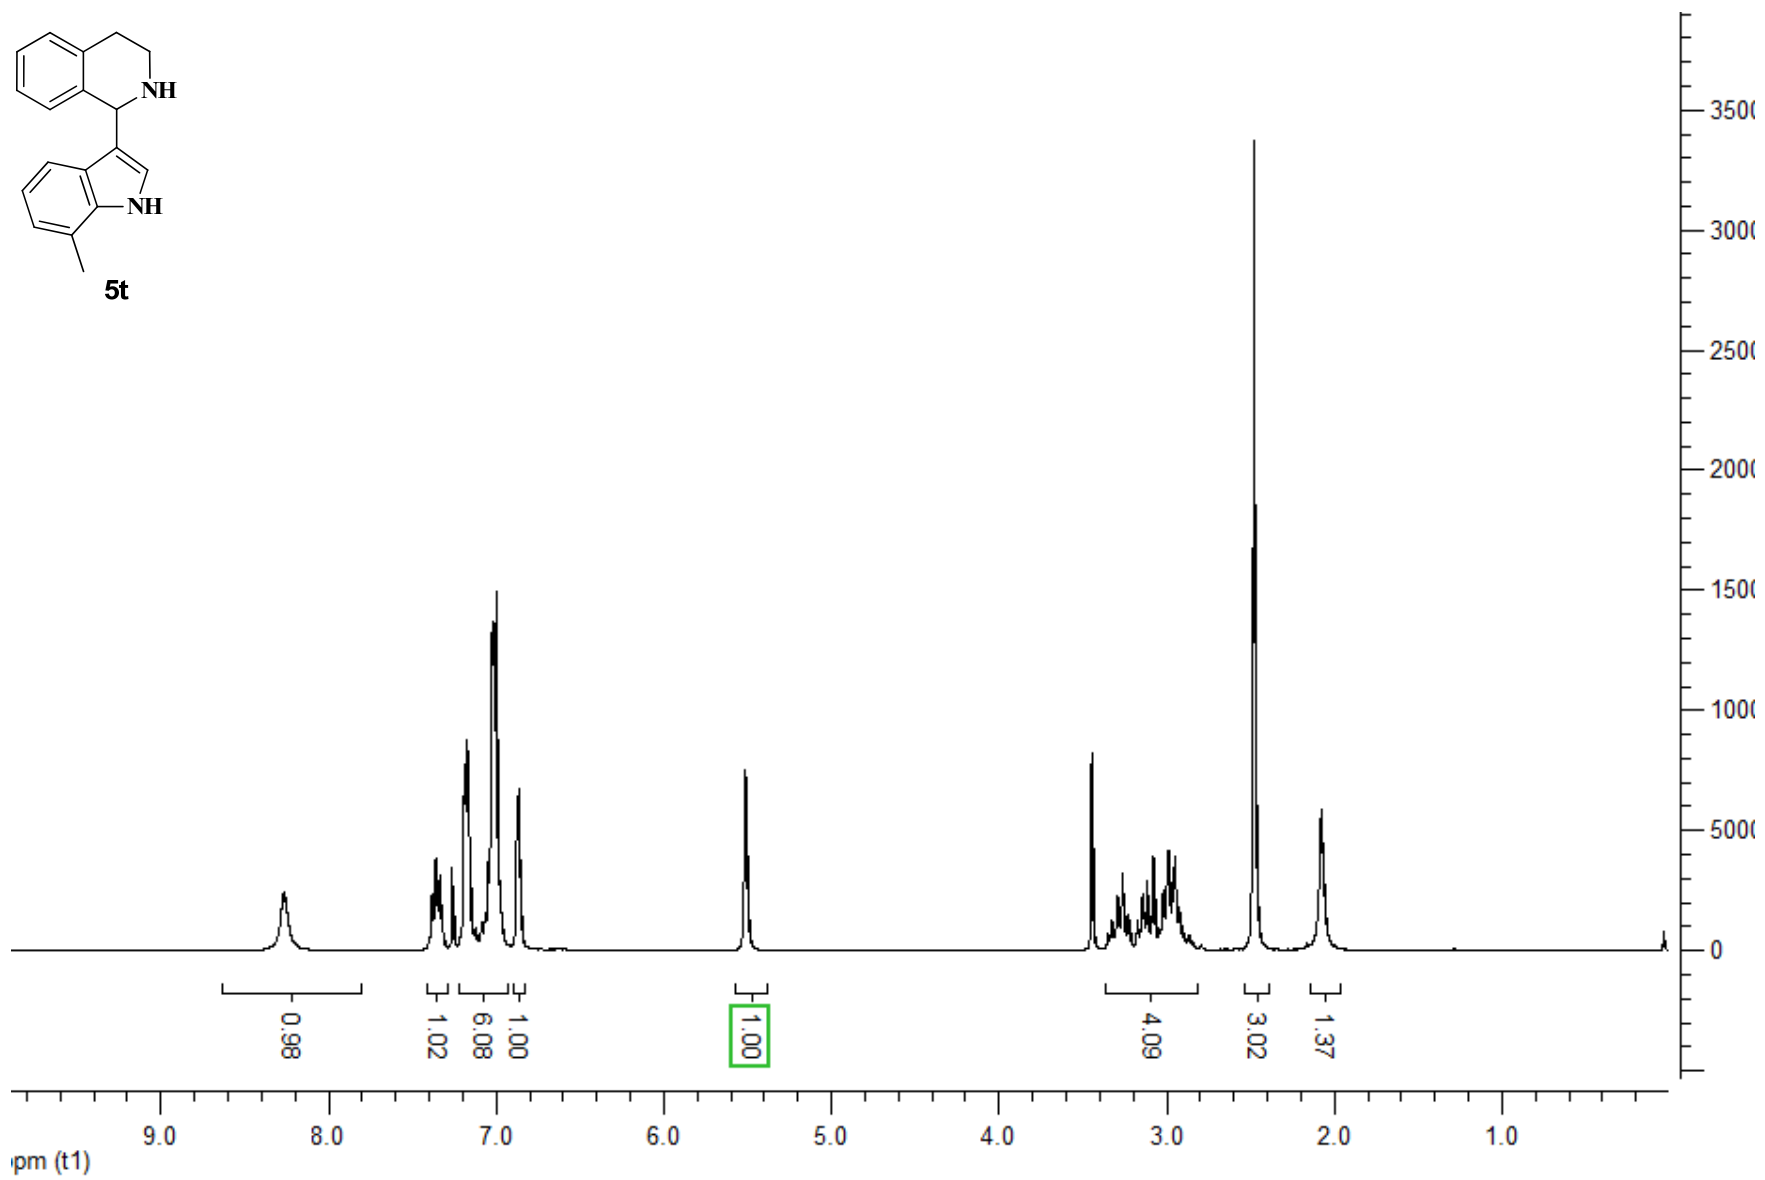

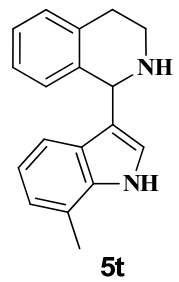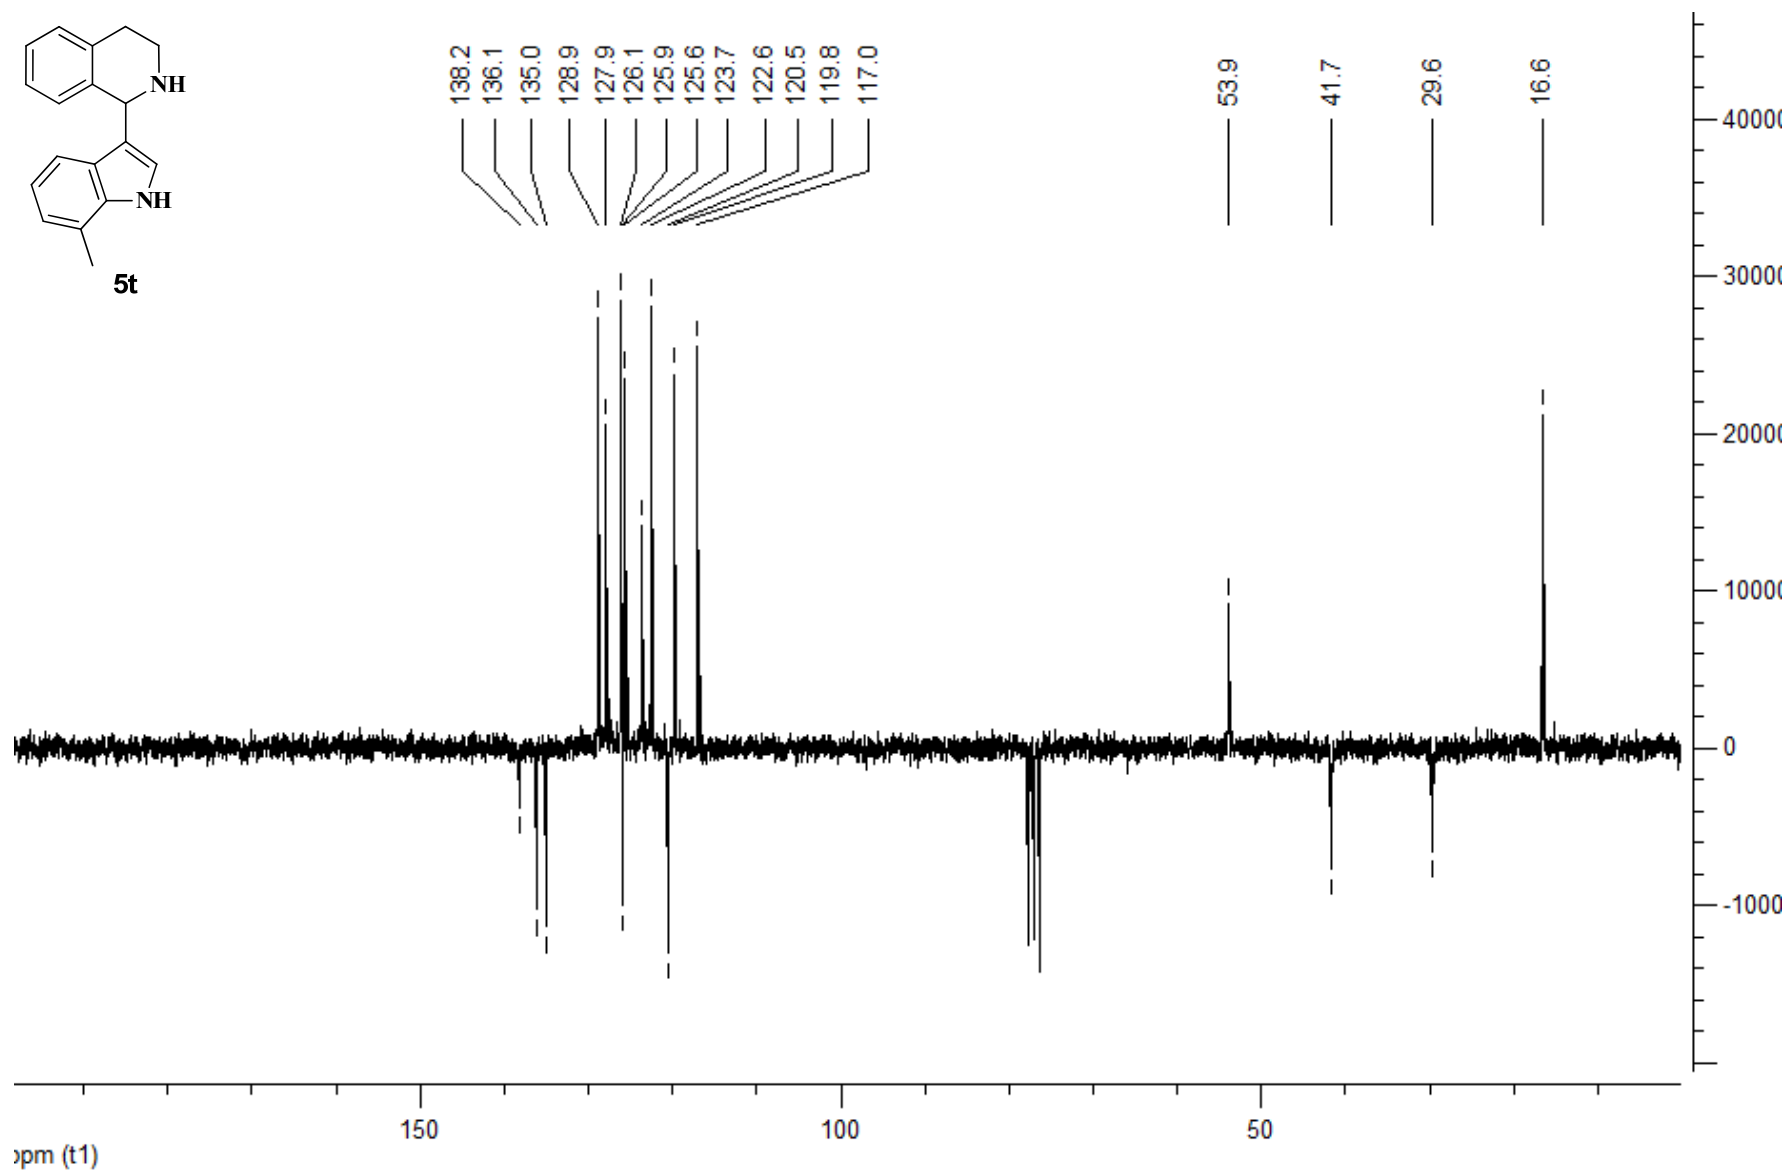

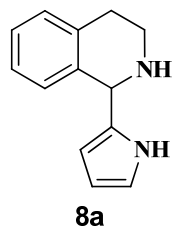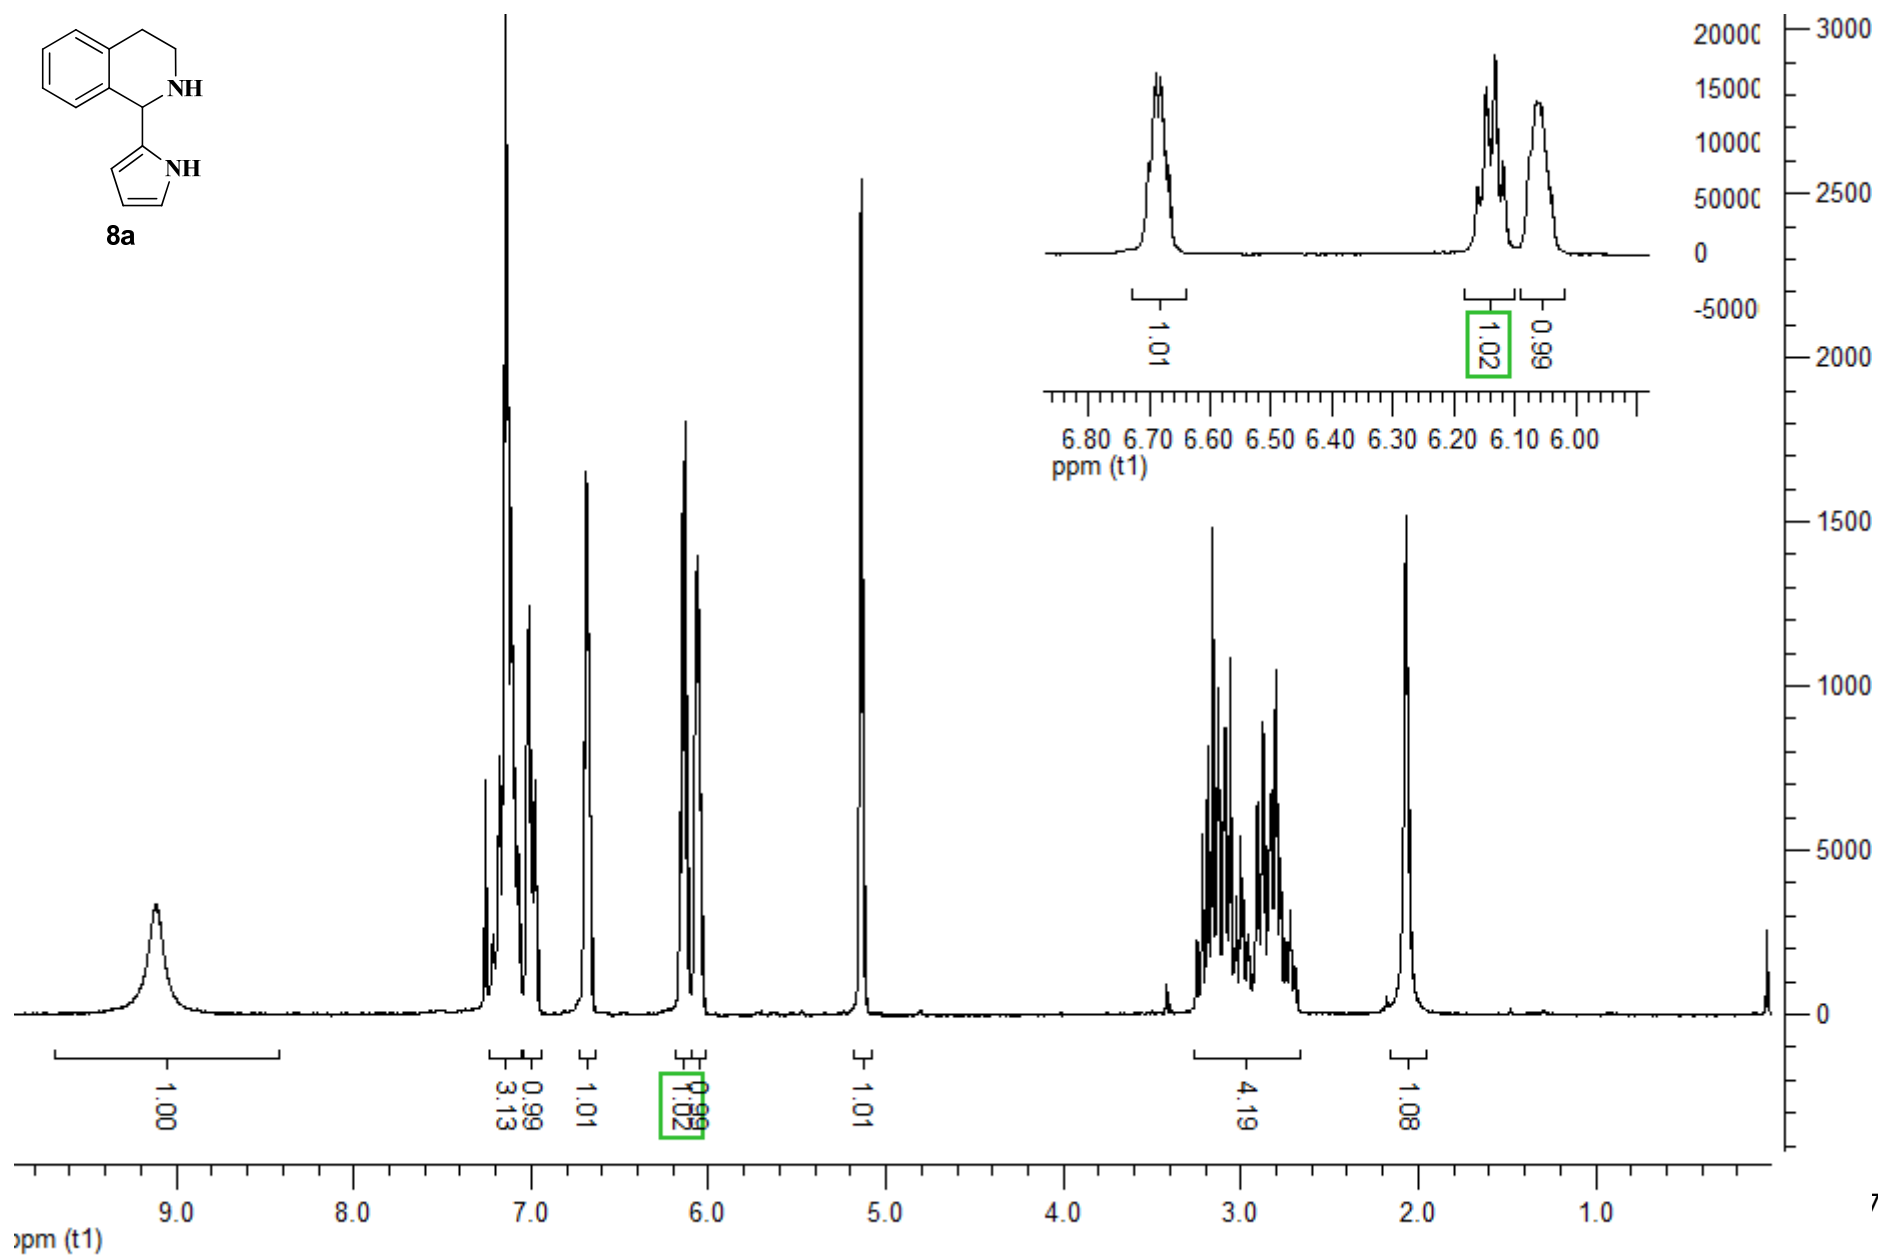

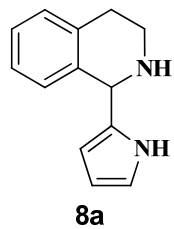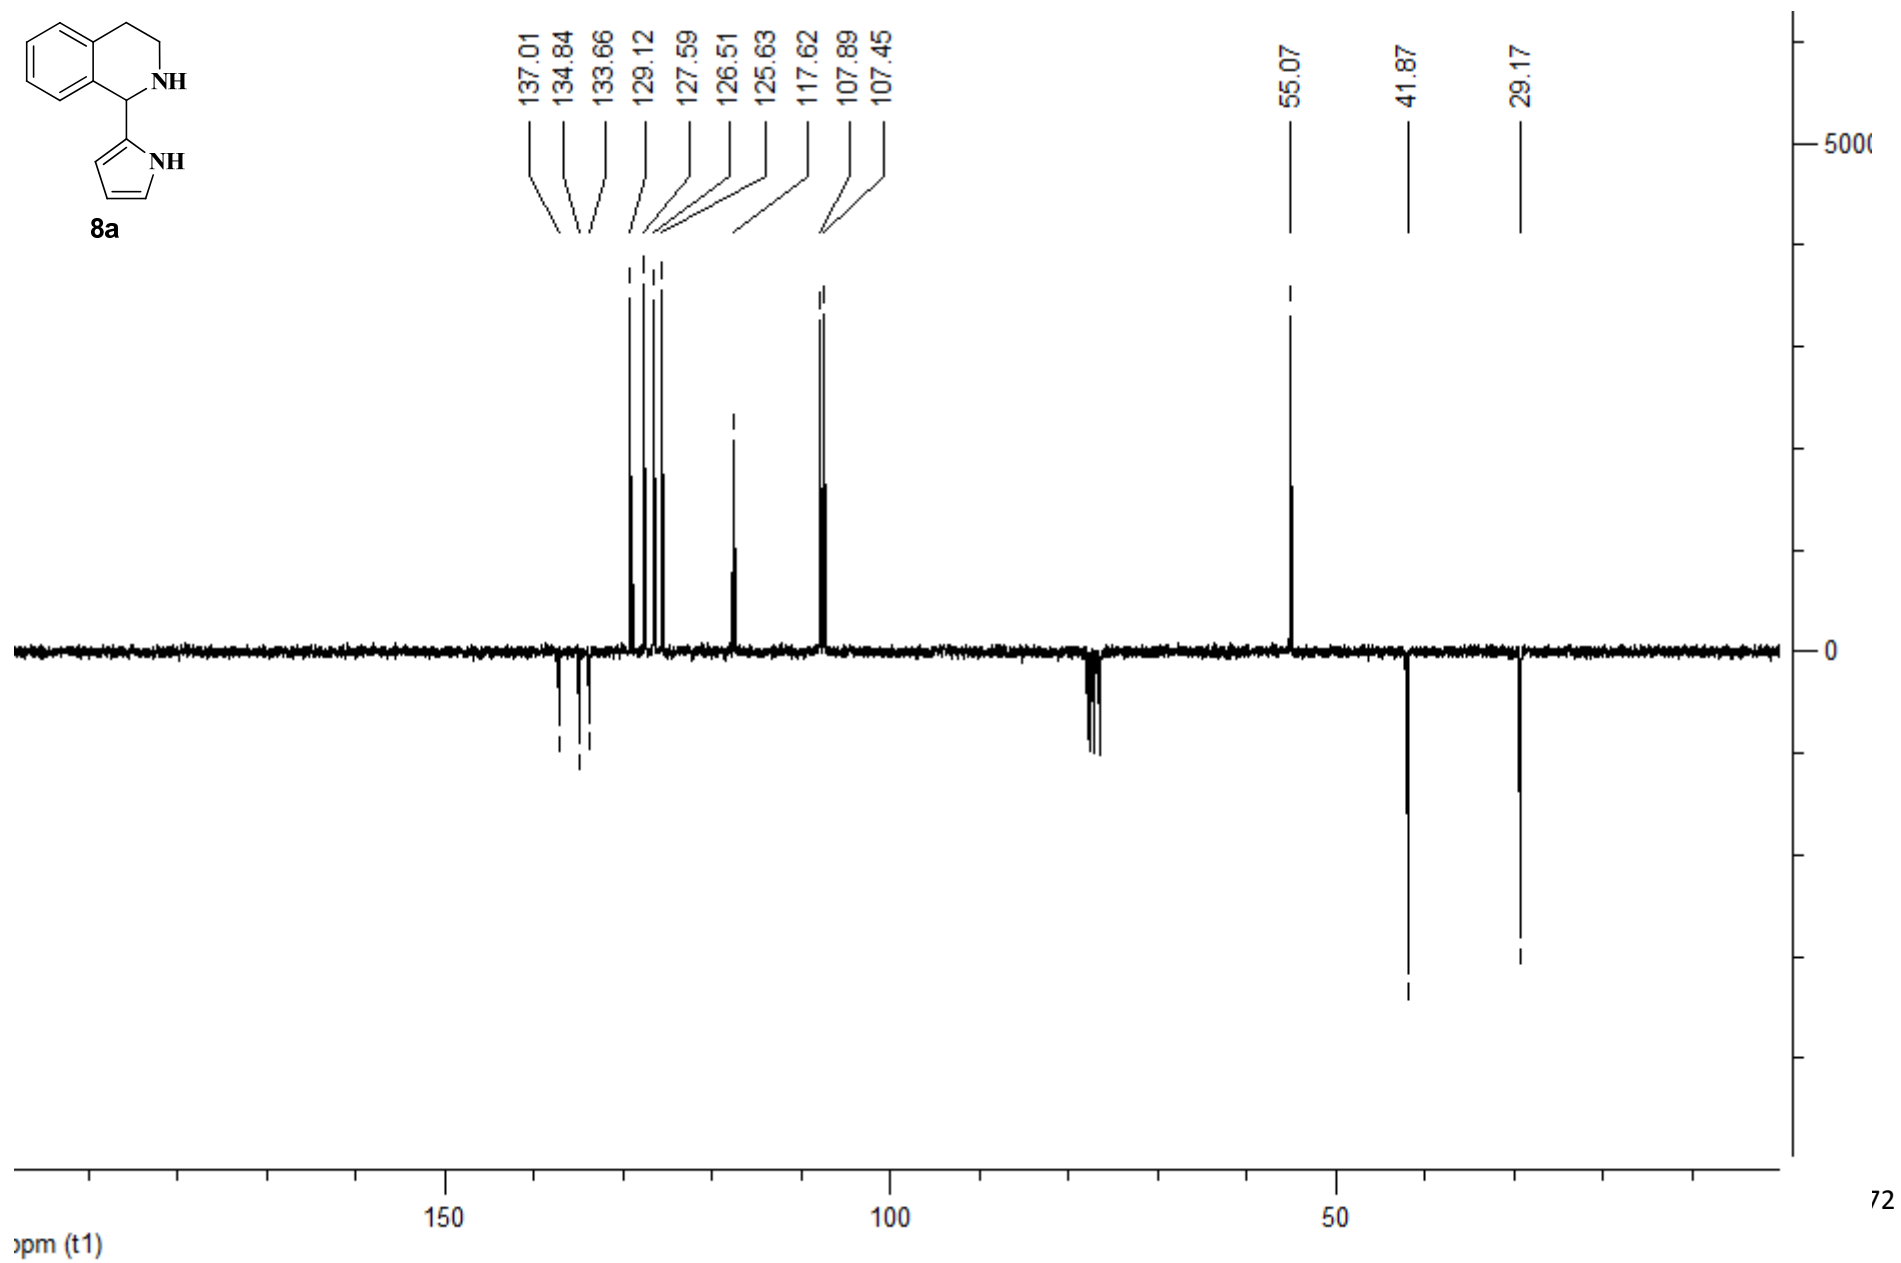



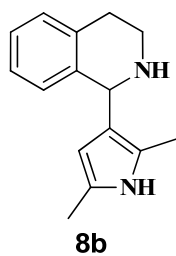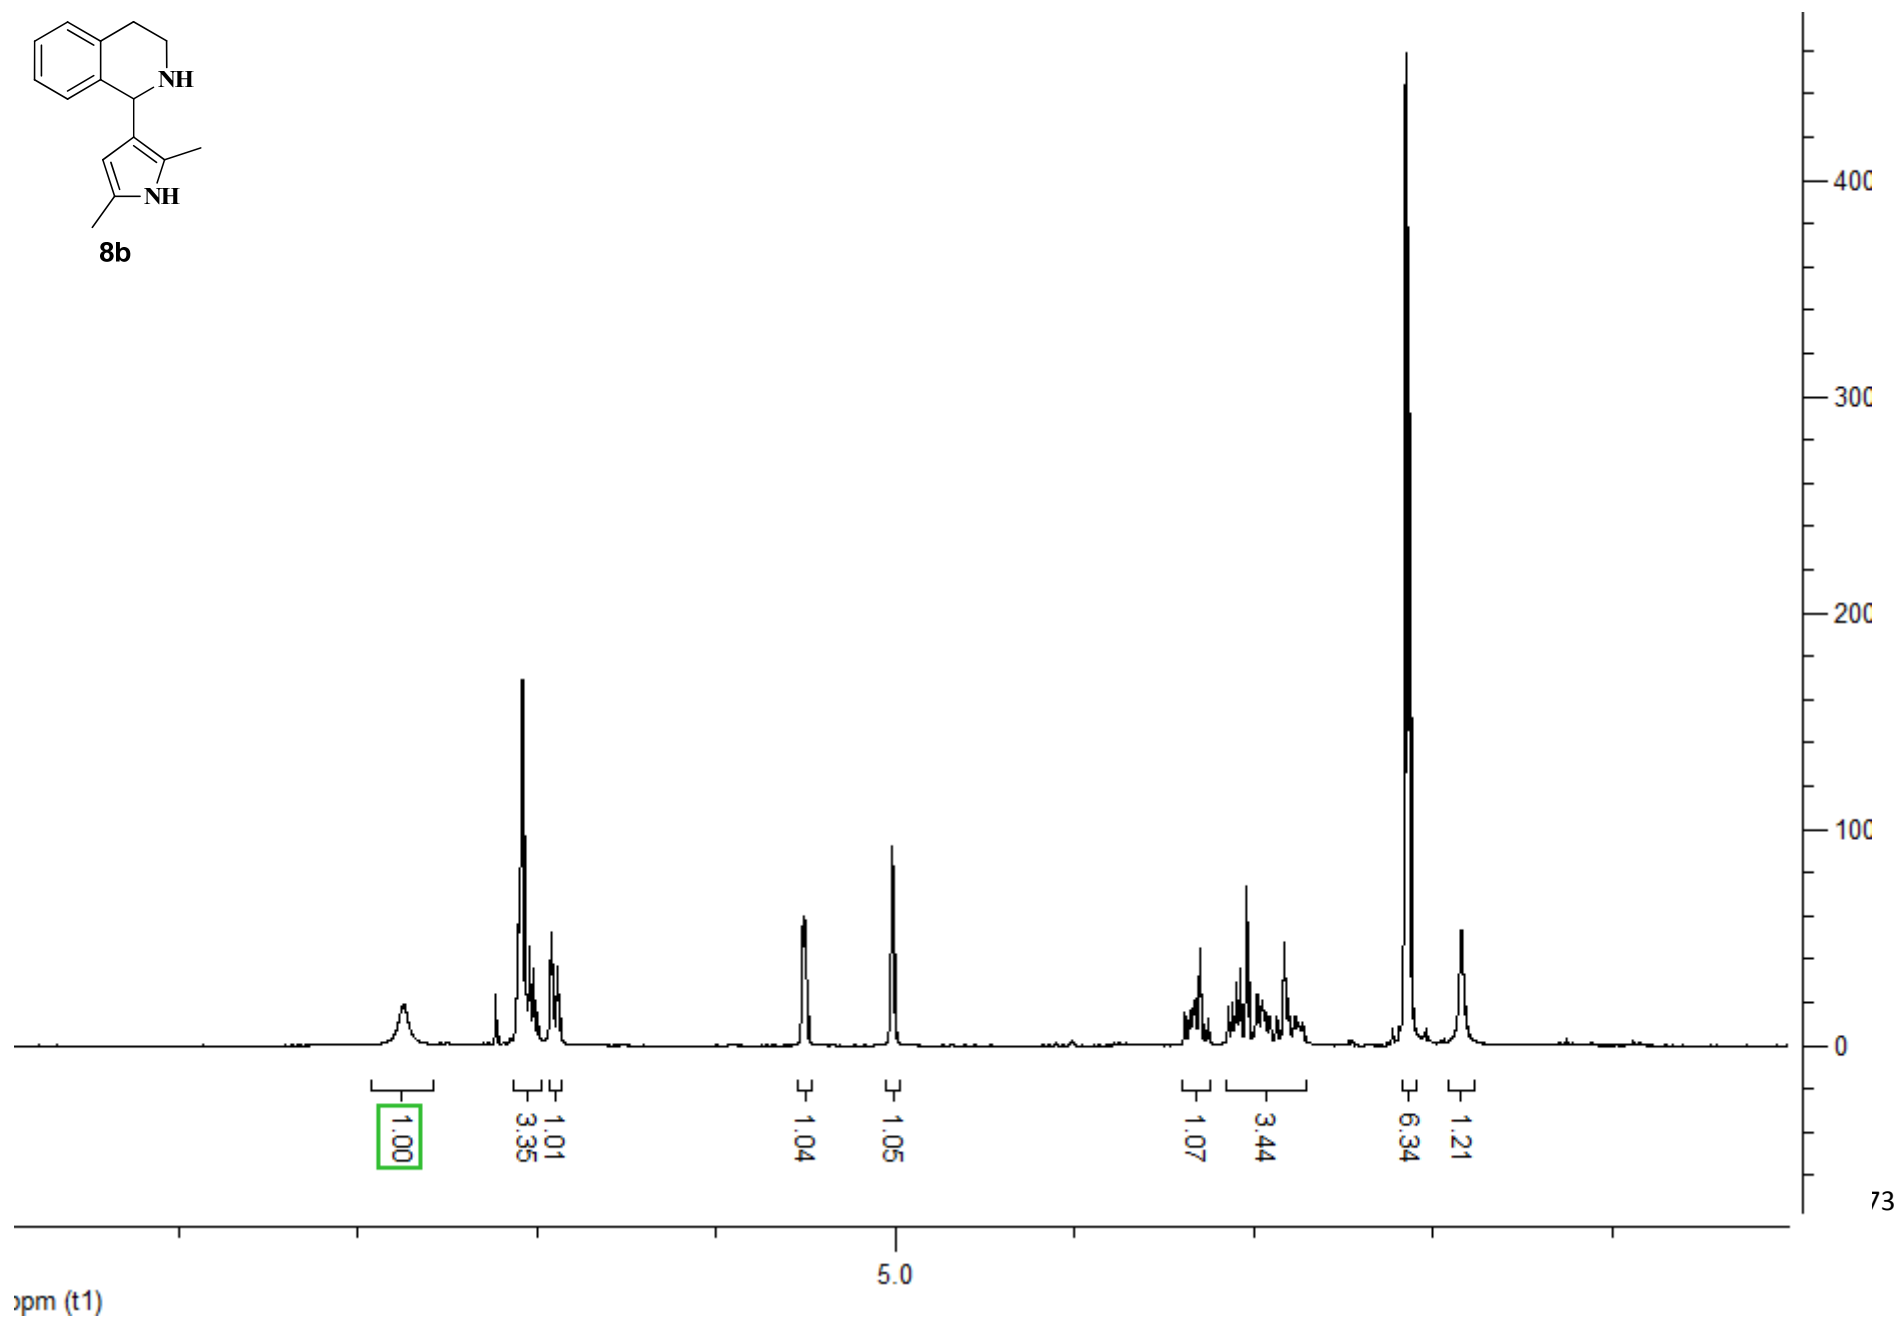

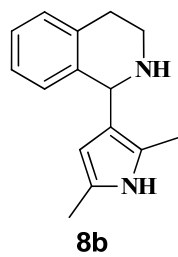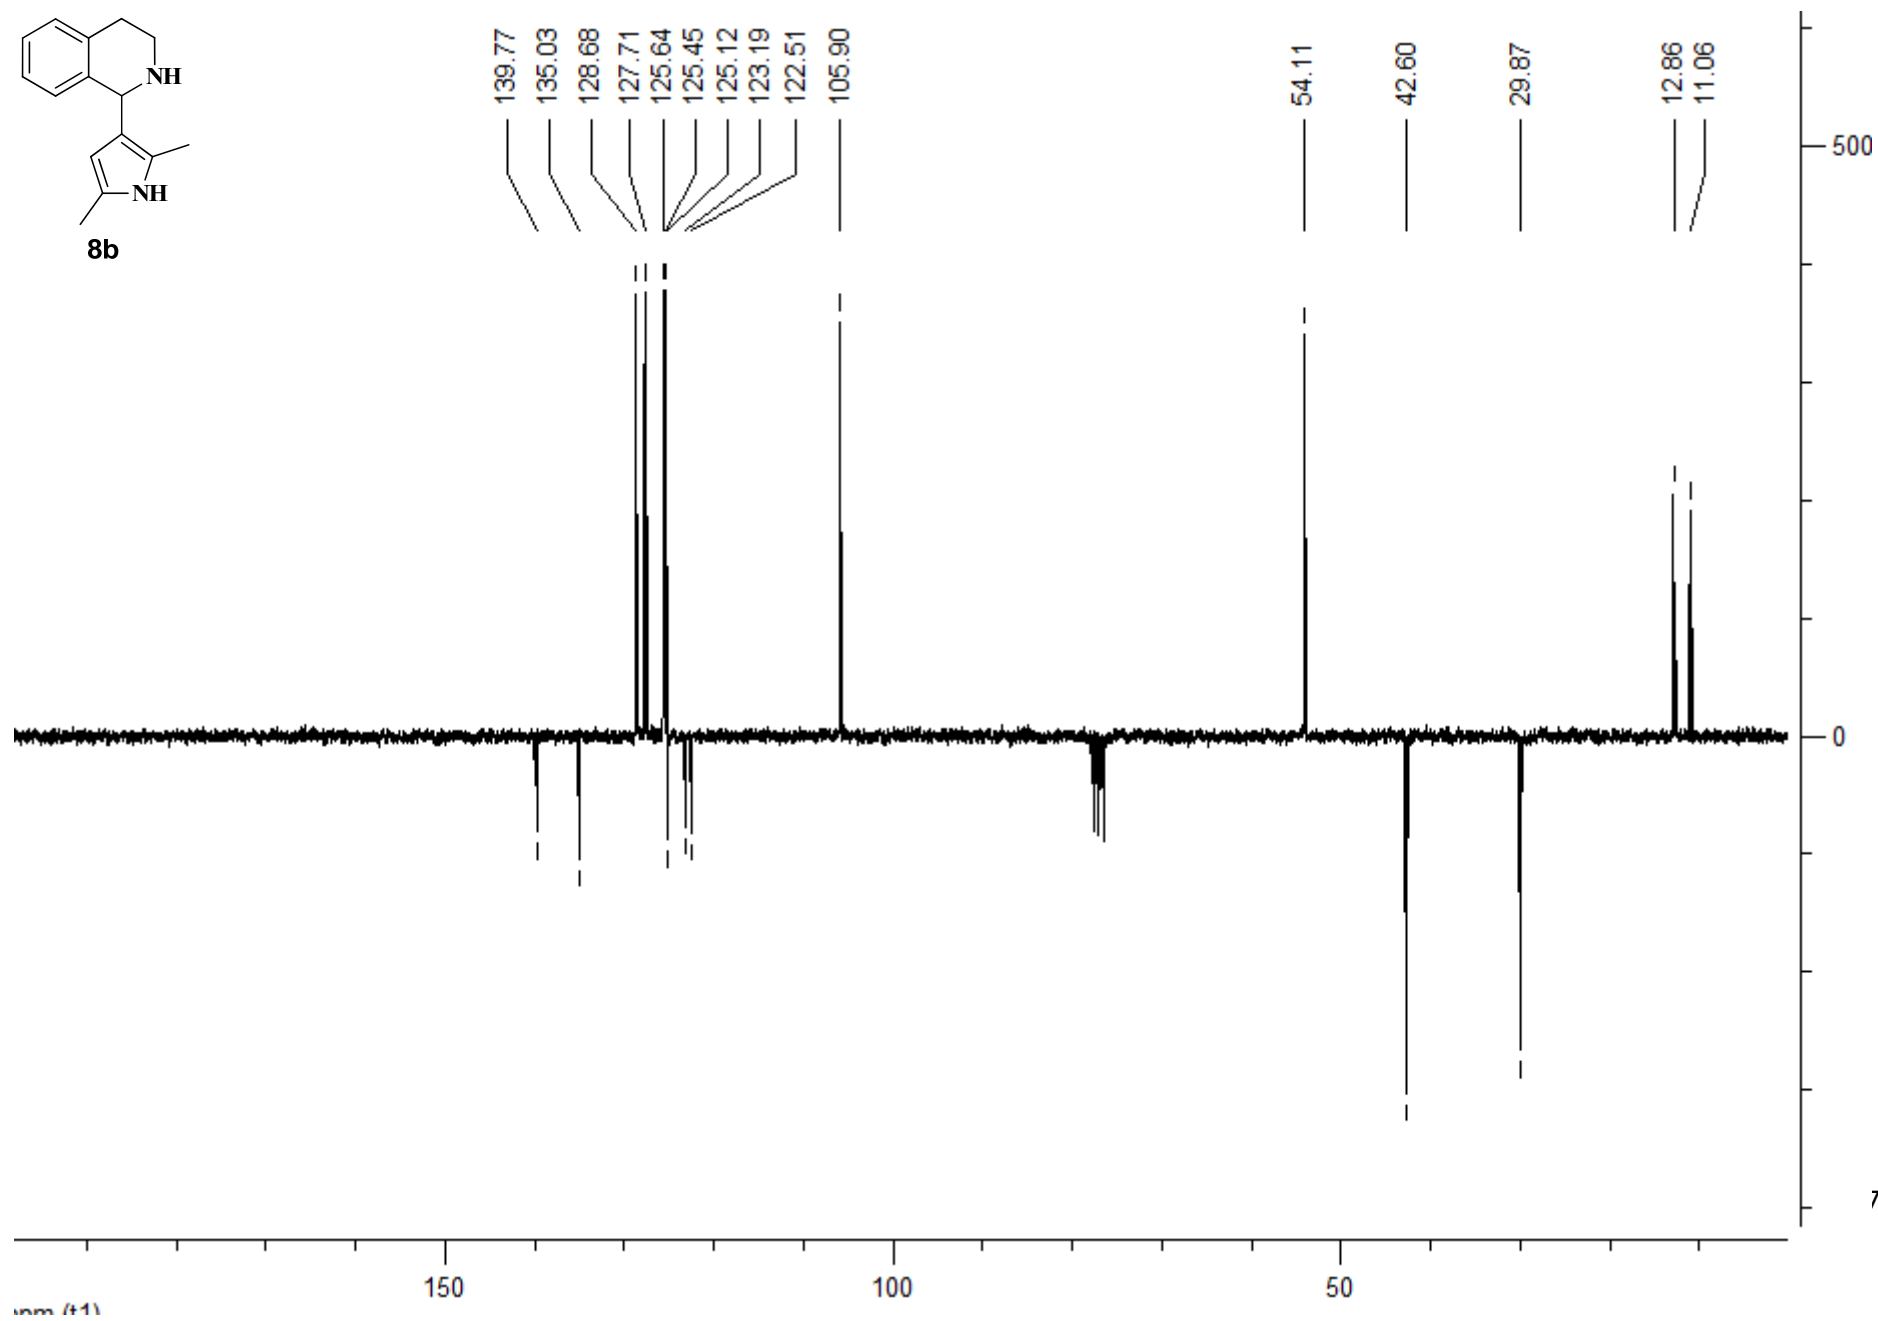

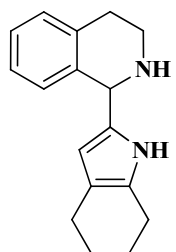

8c

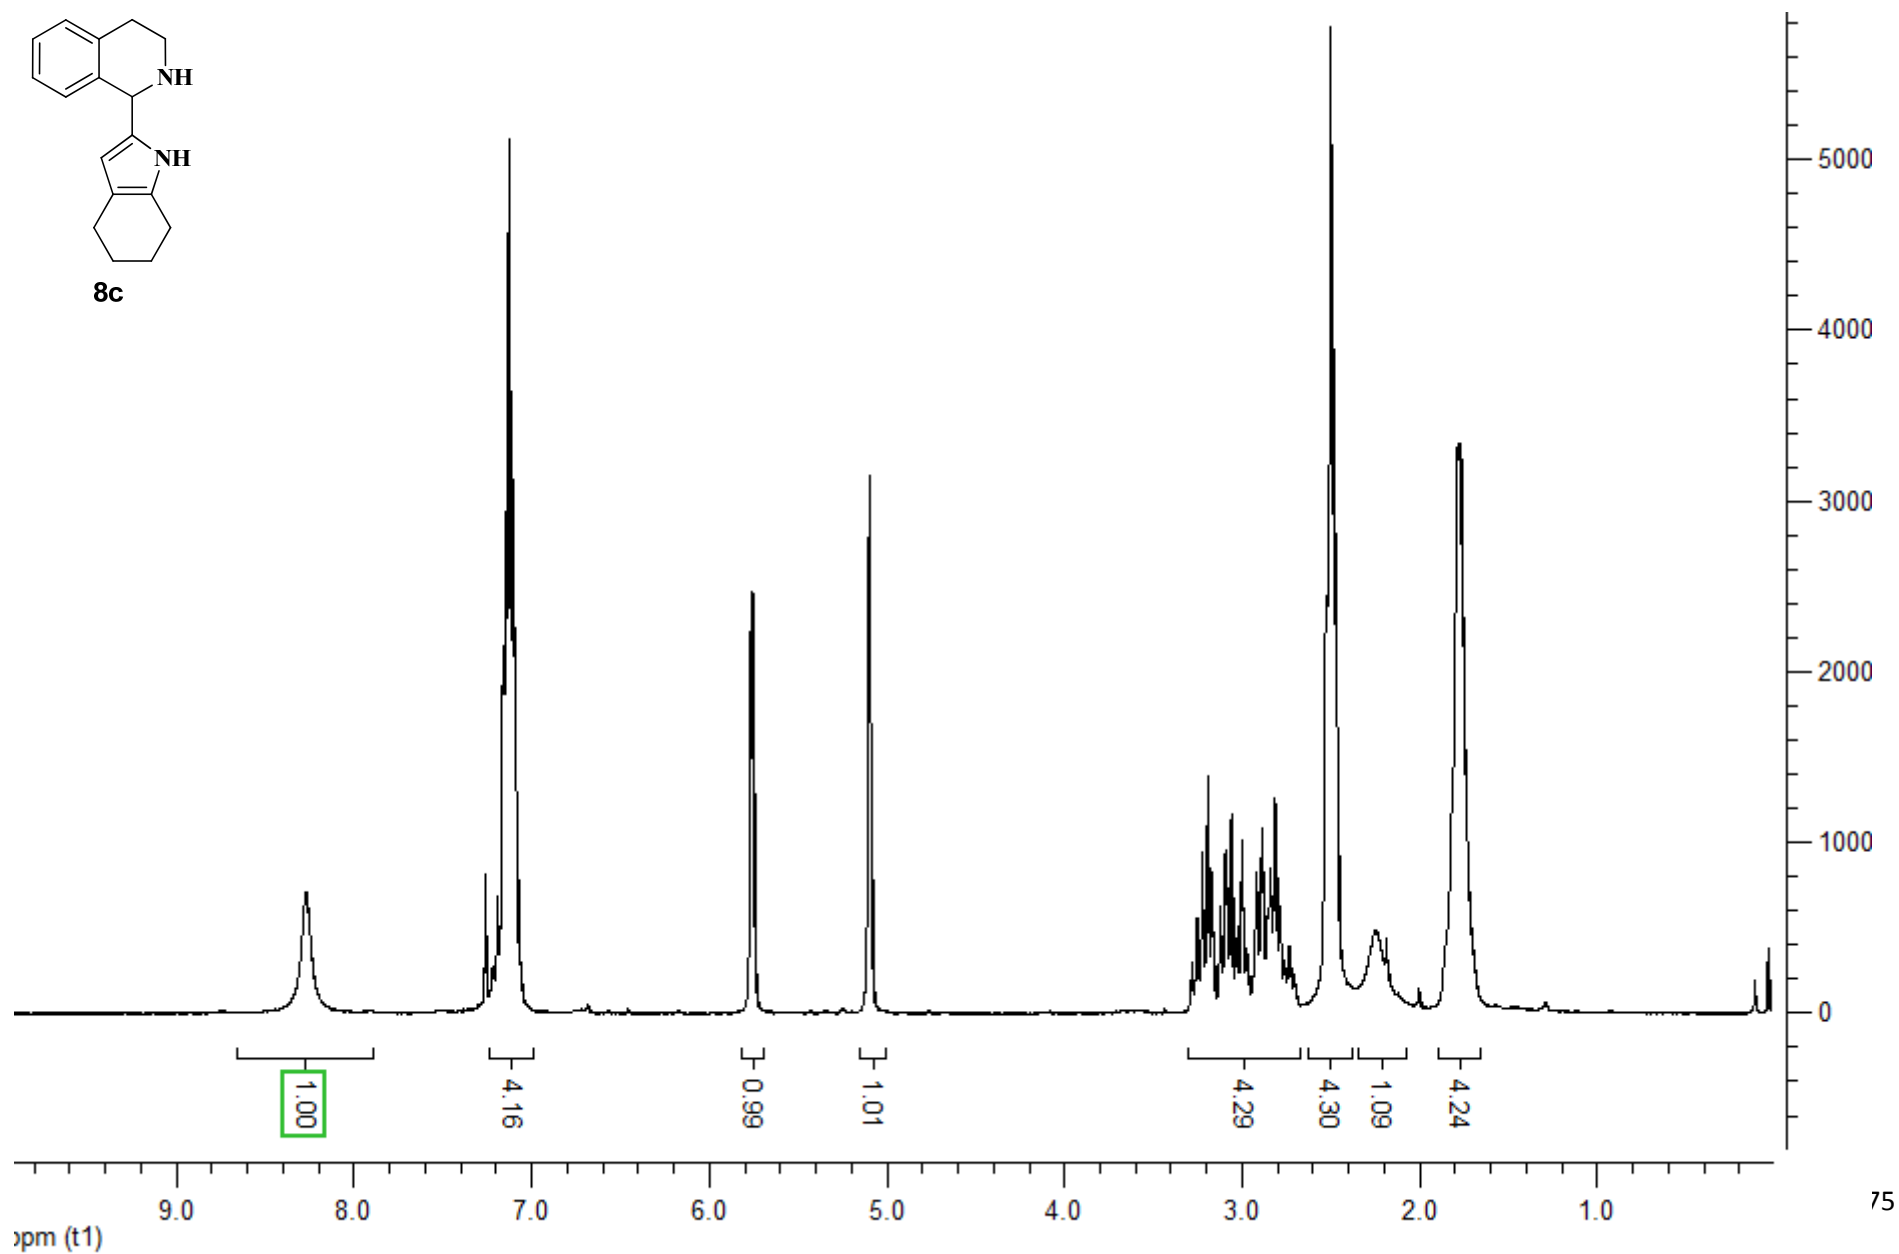

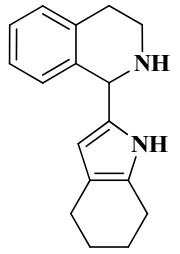

8c

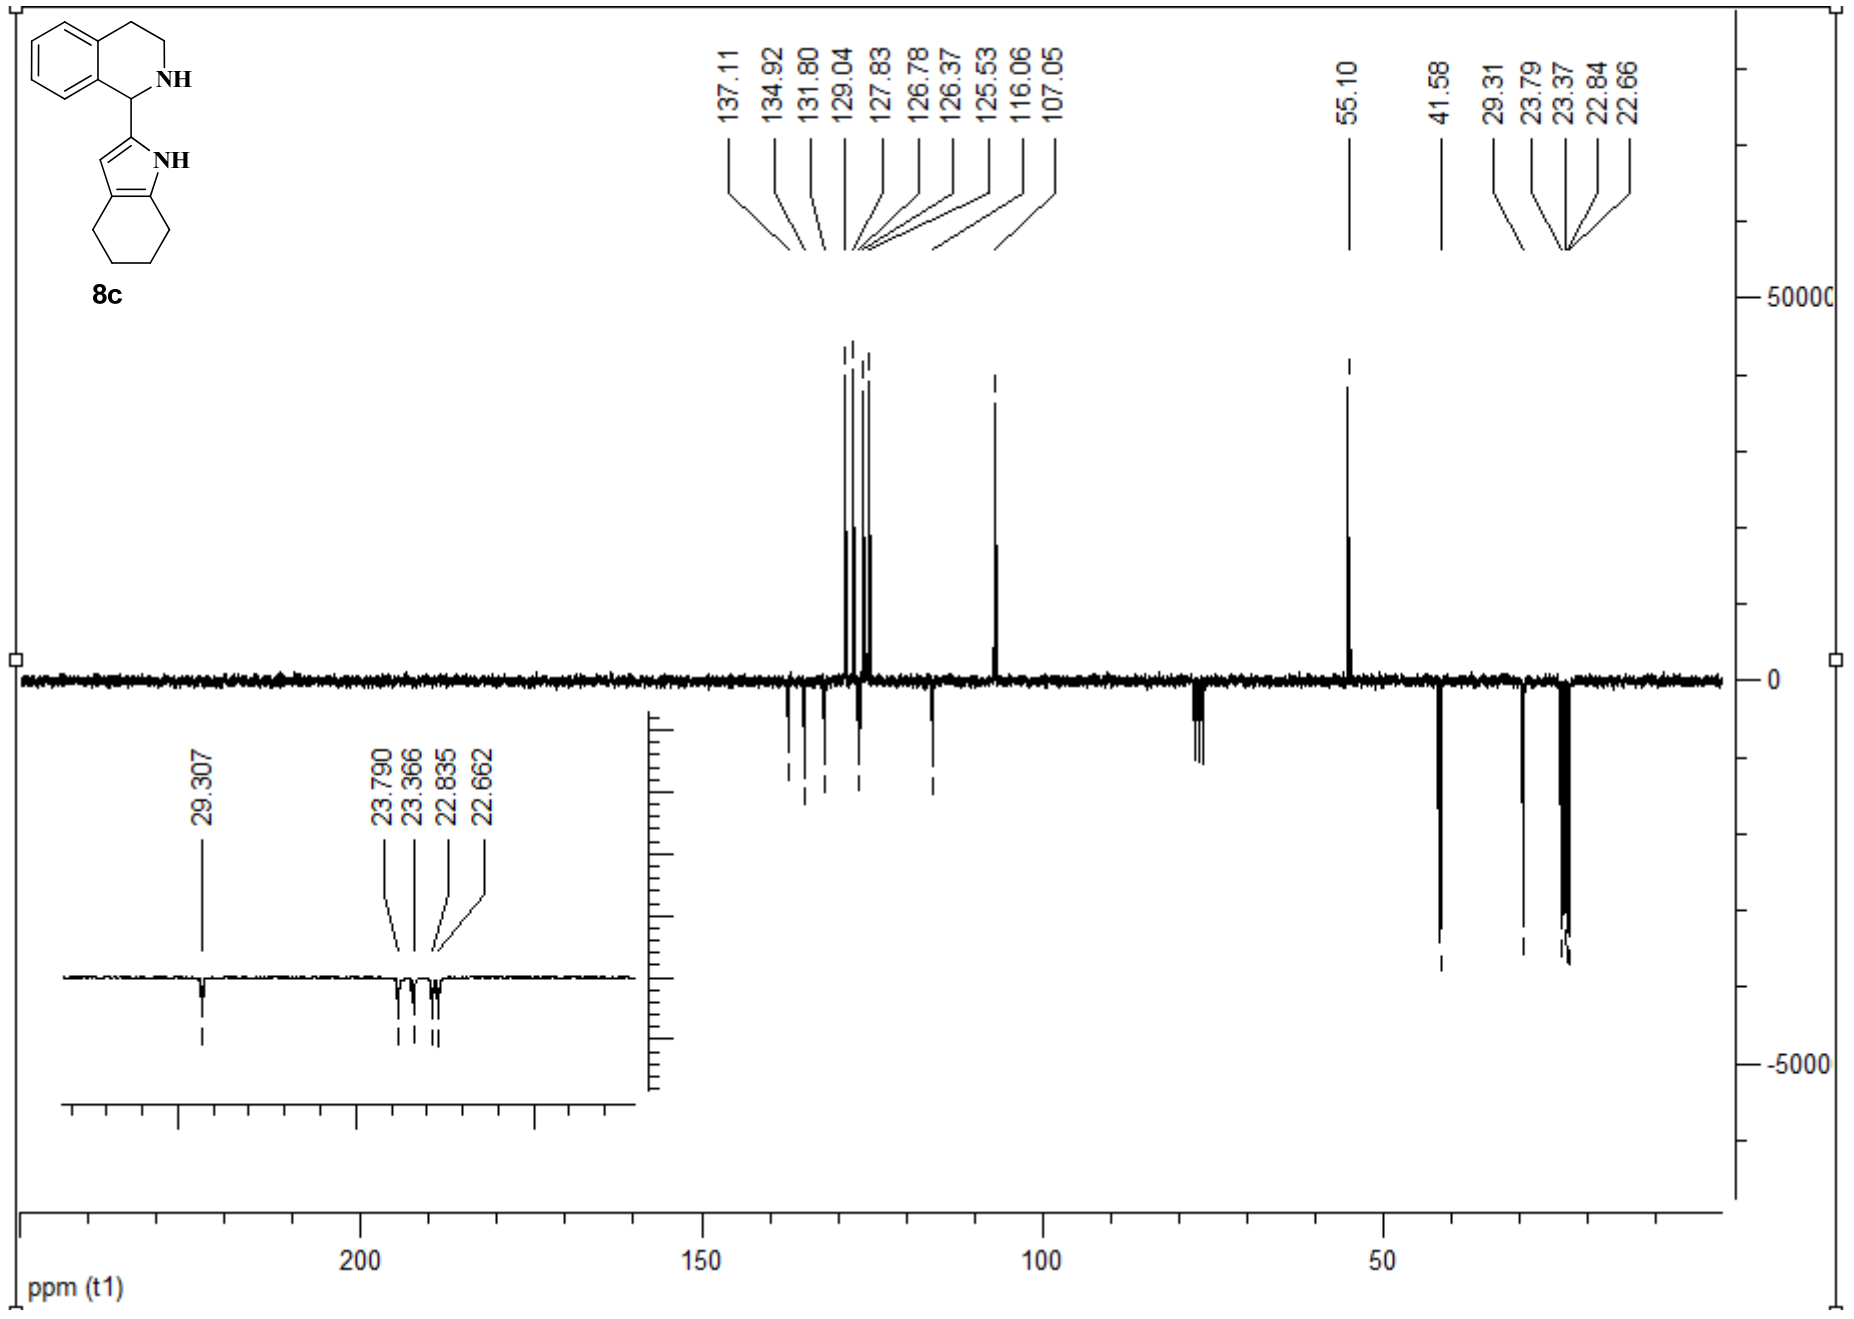

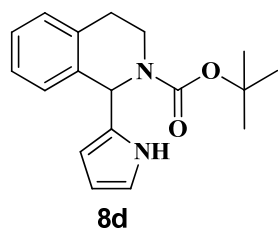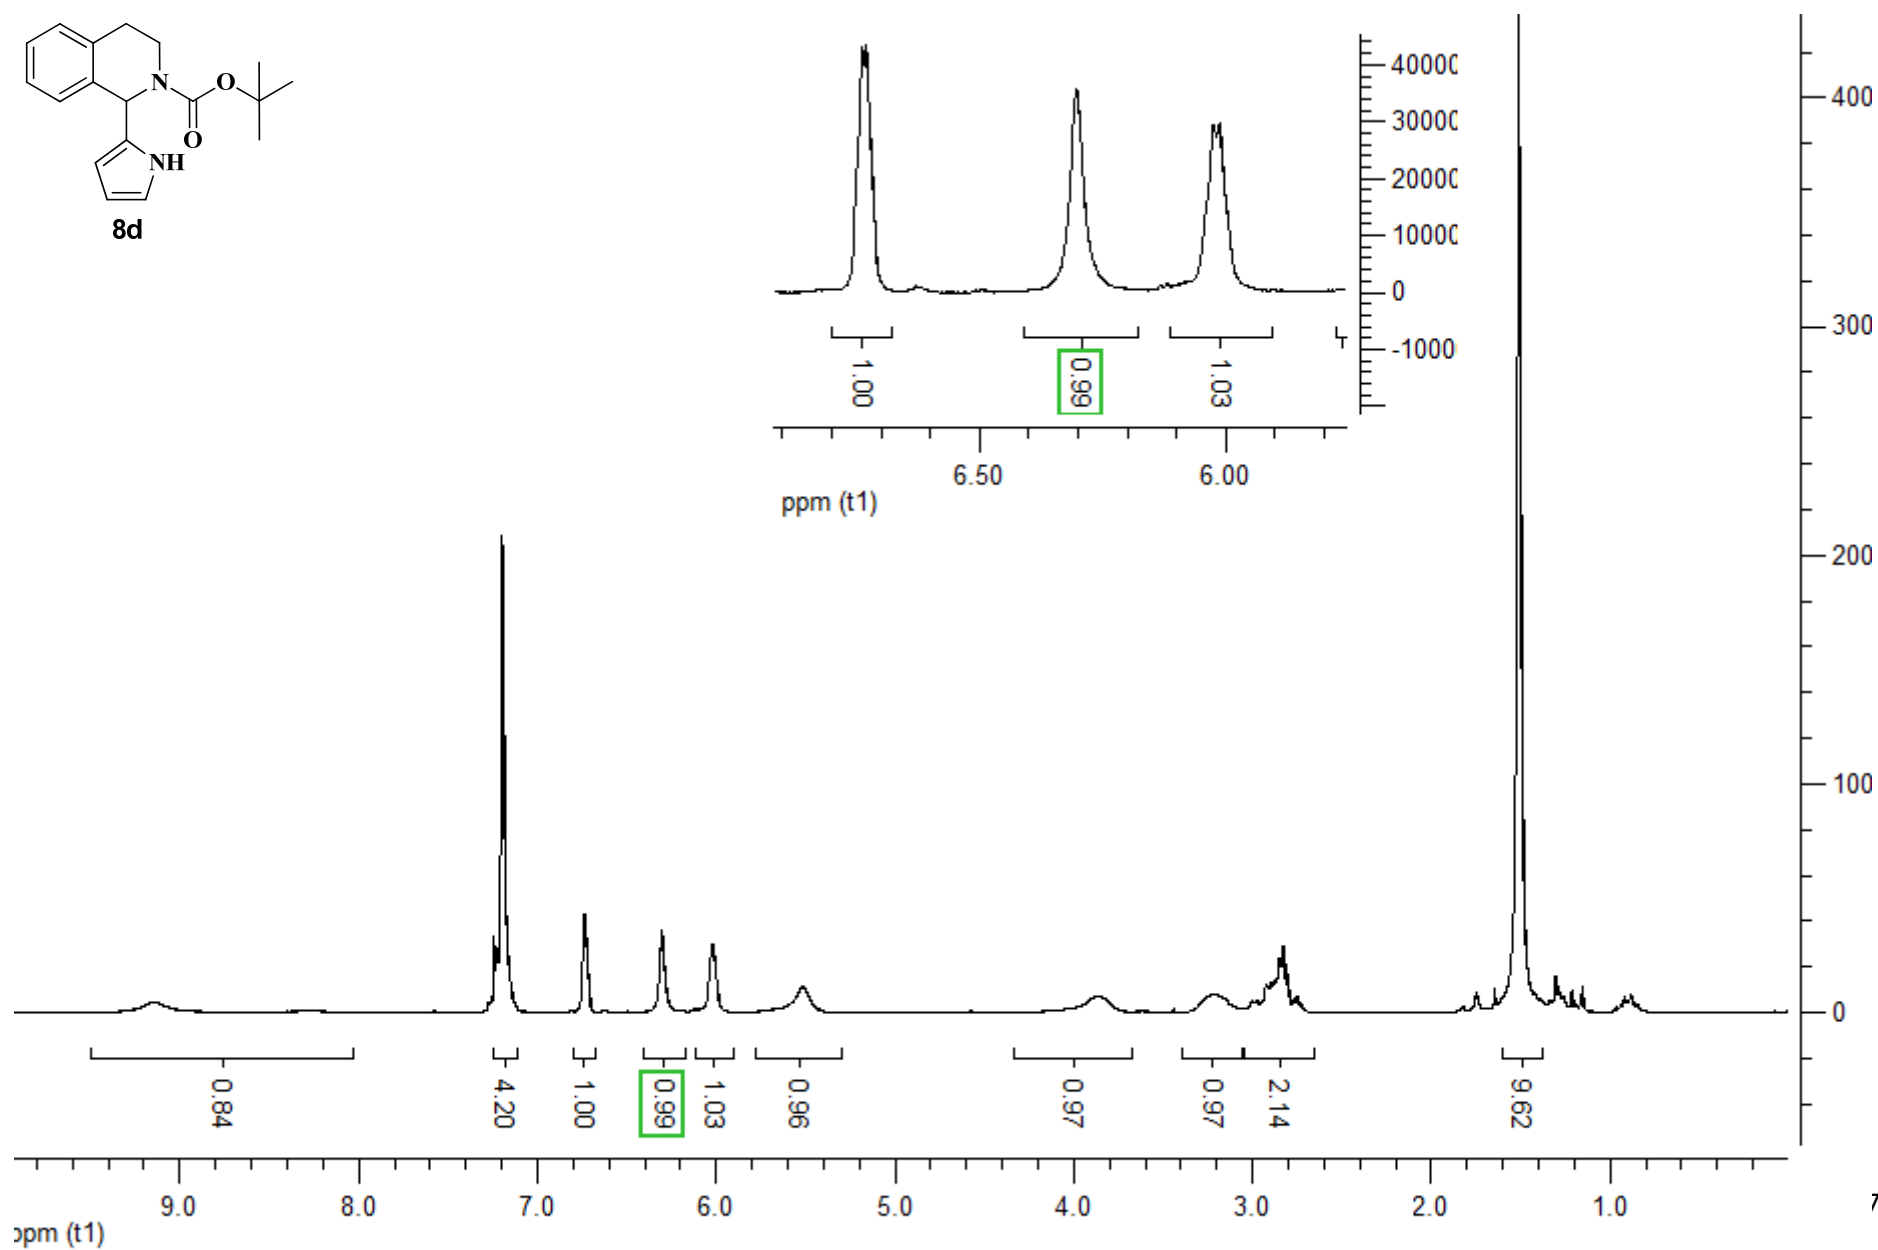

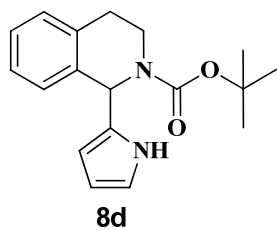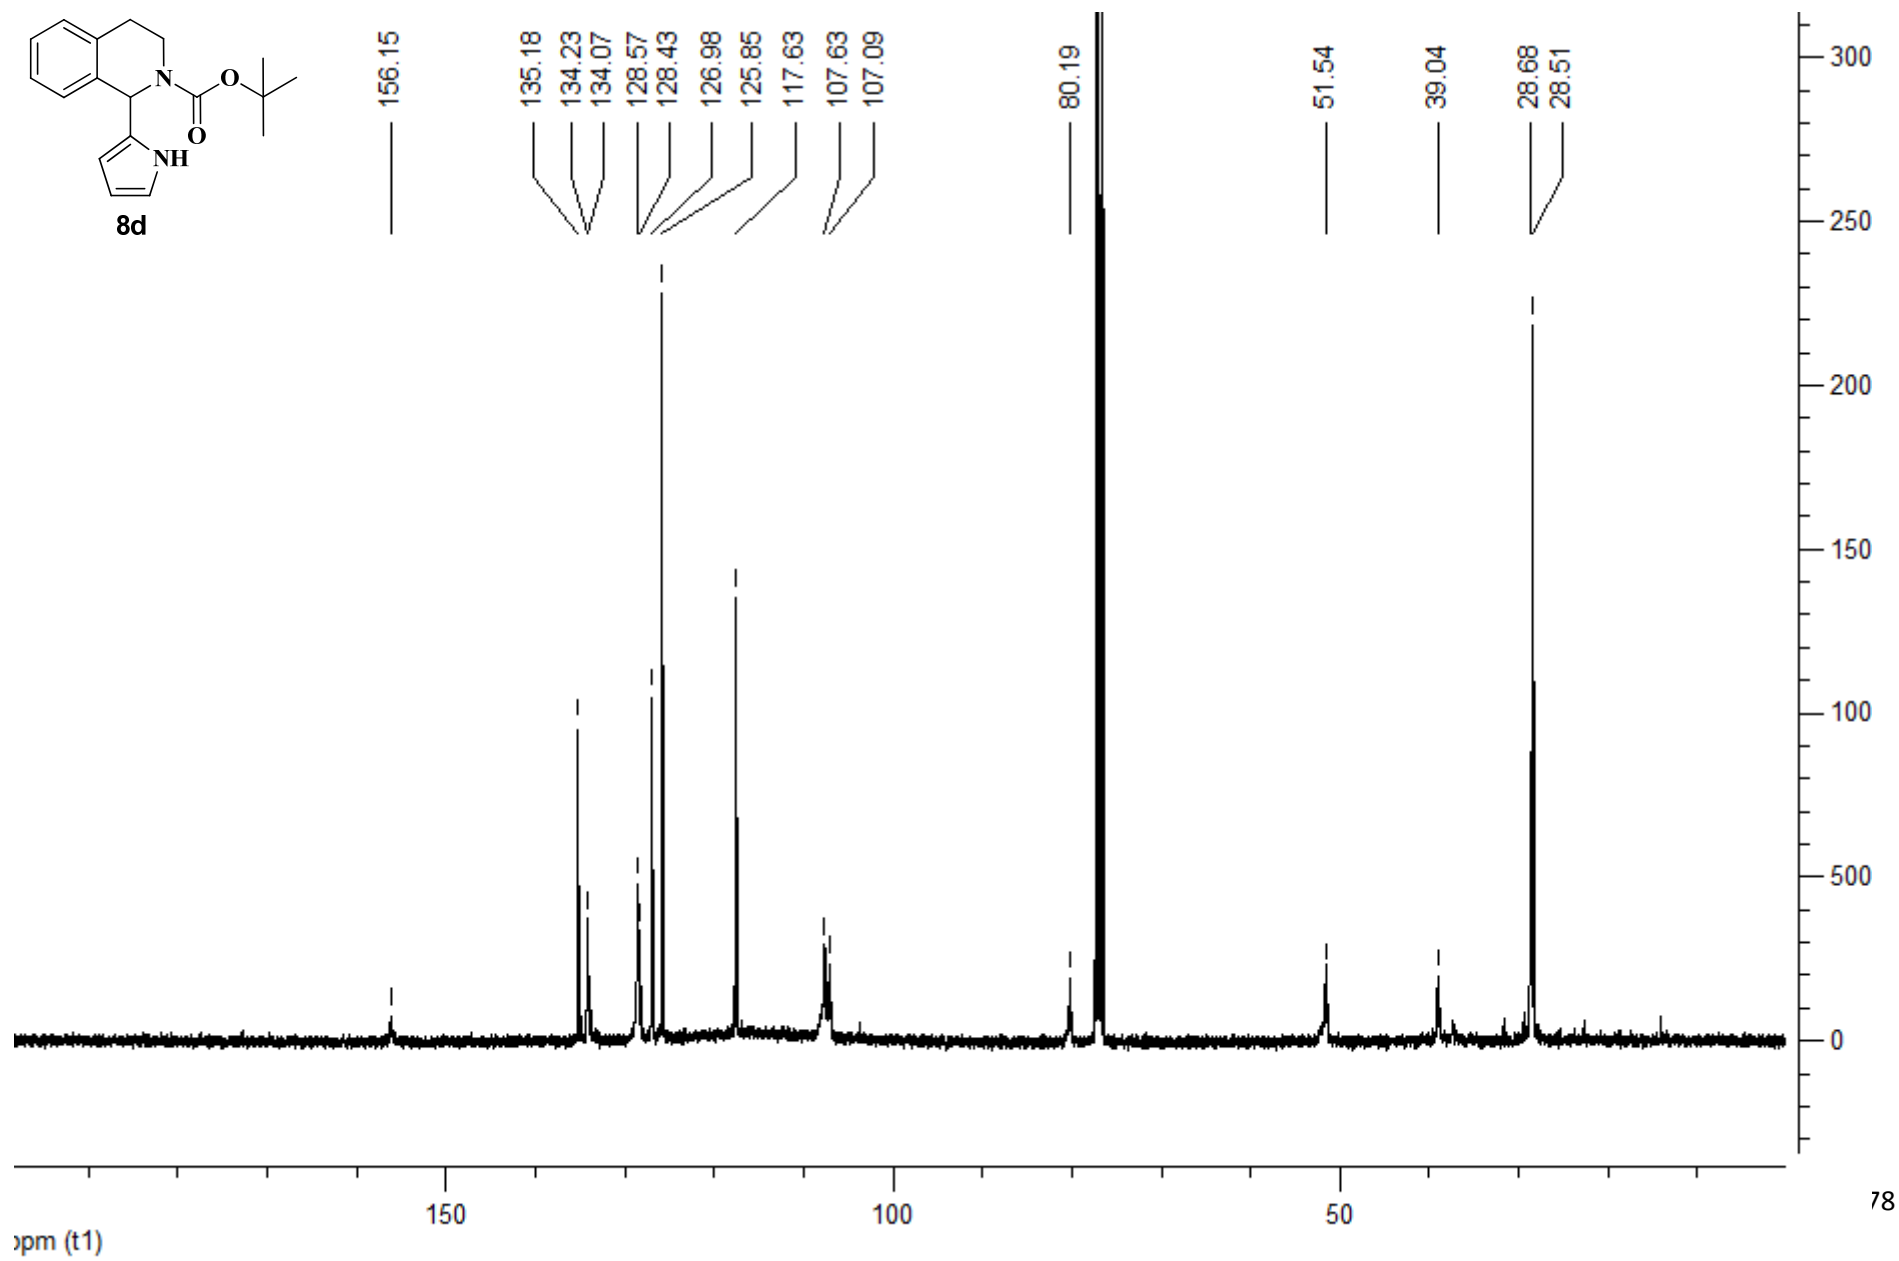

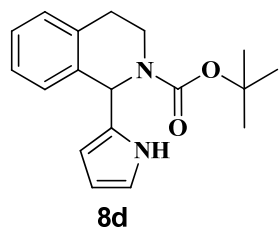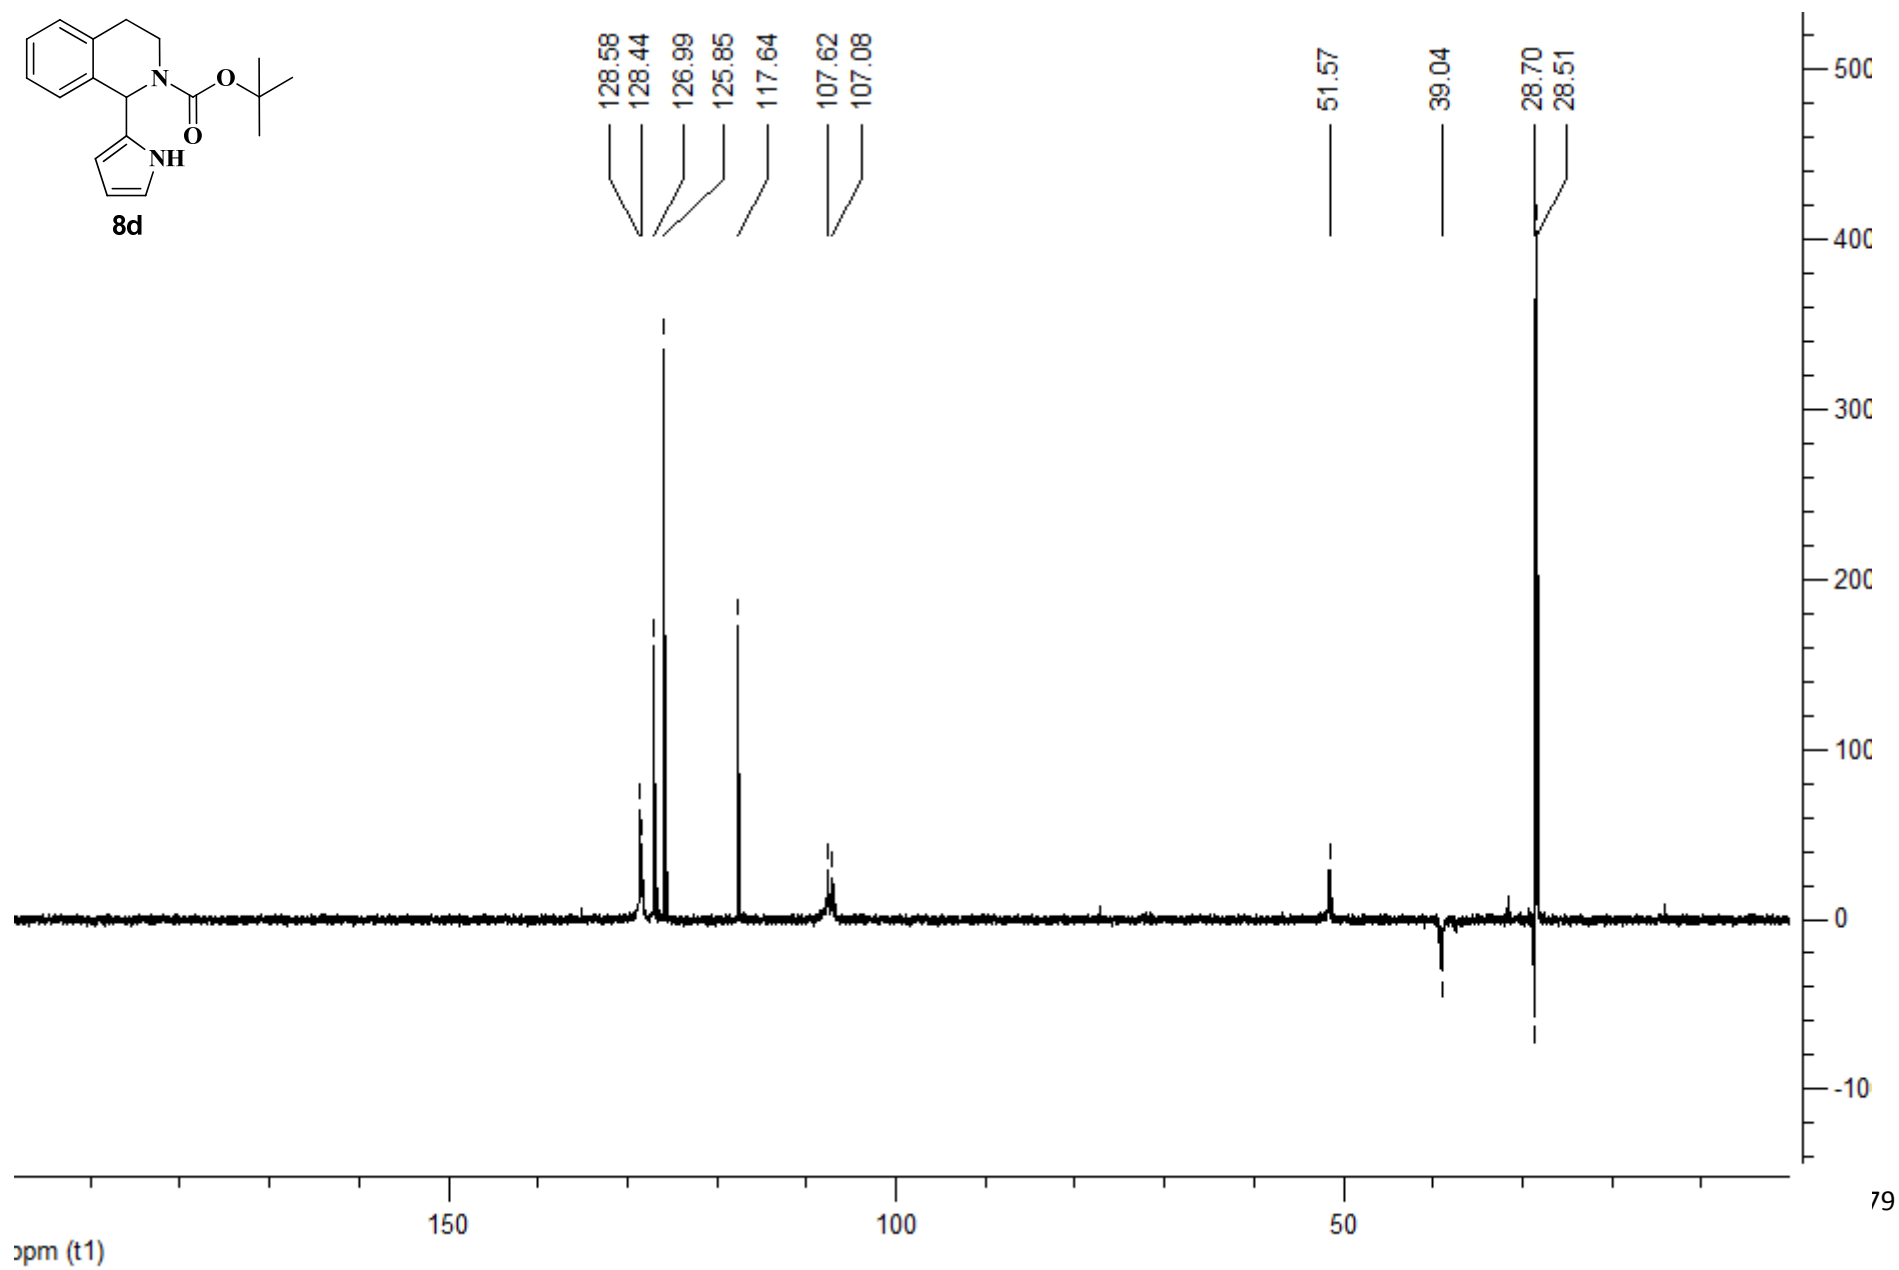

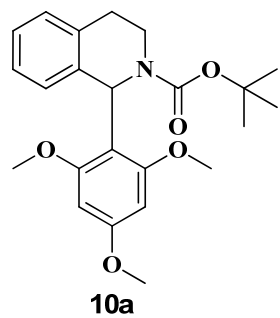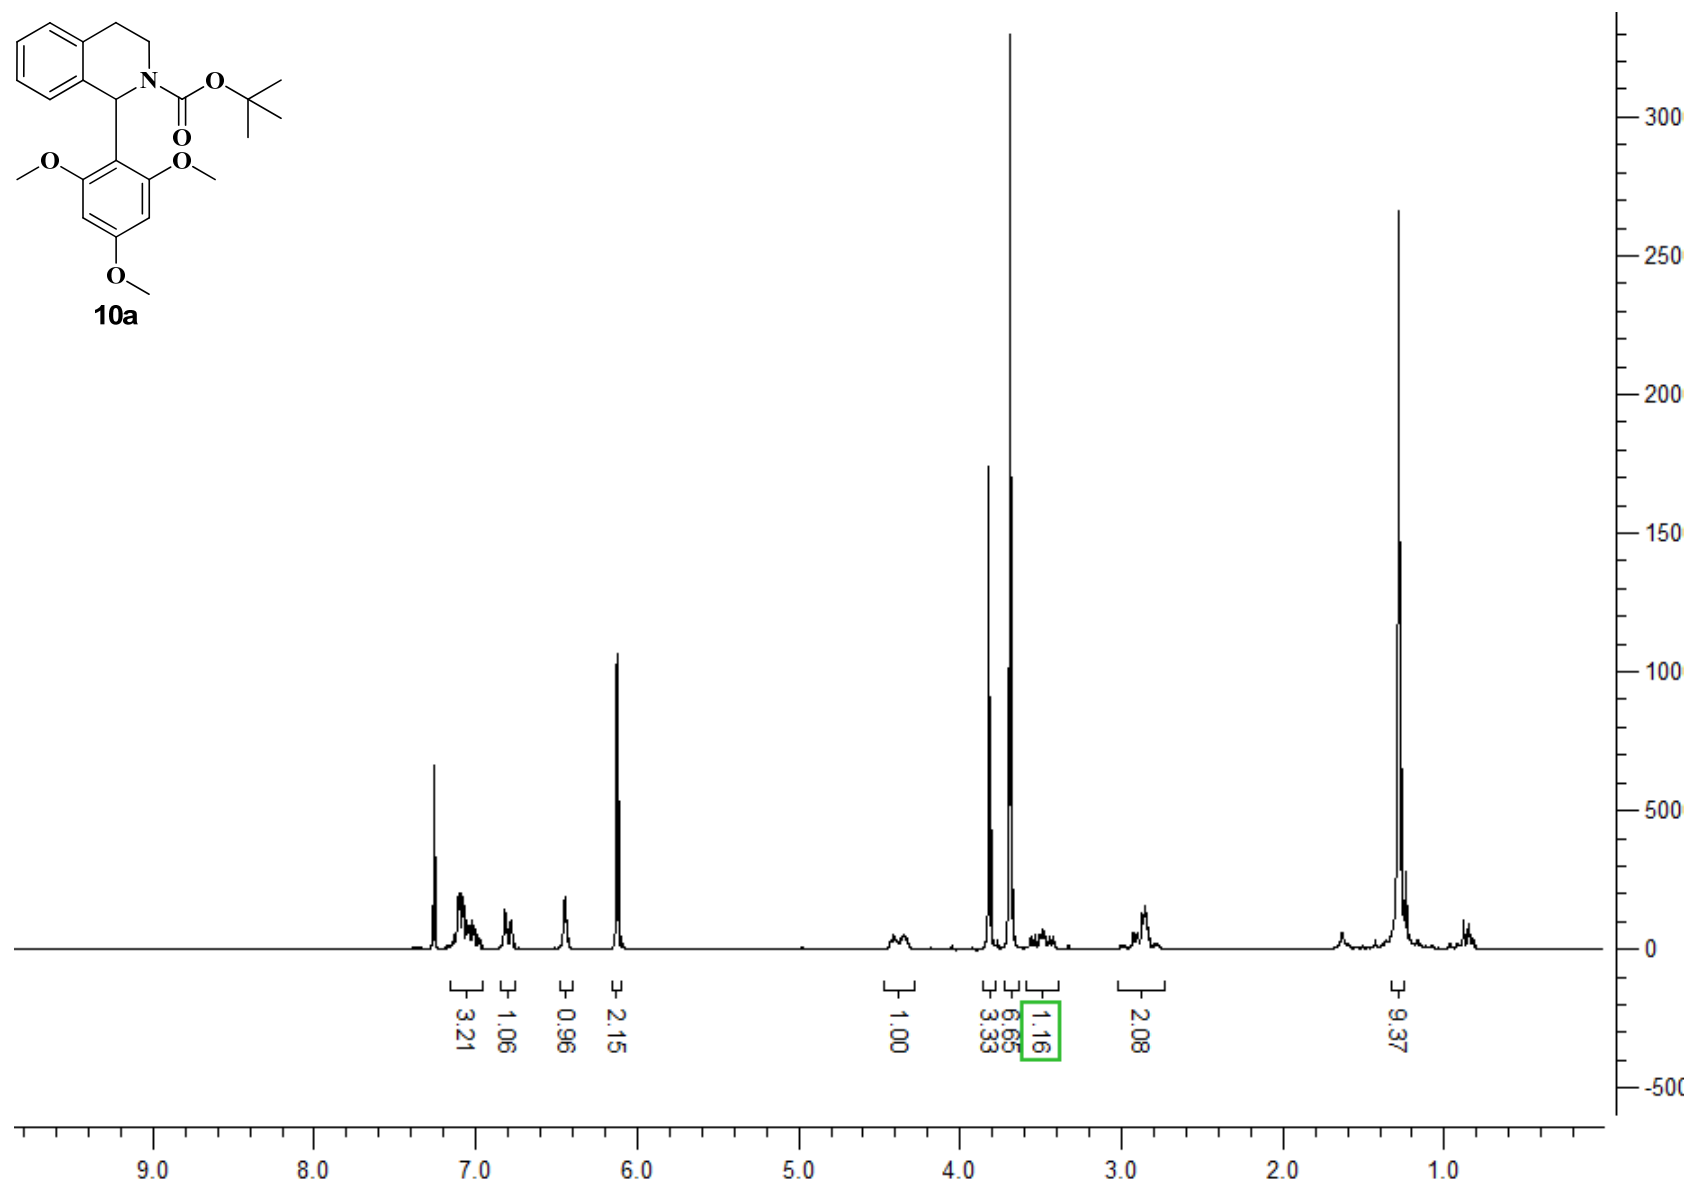



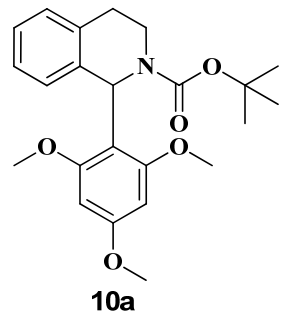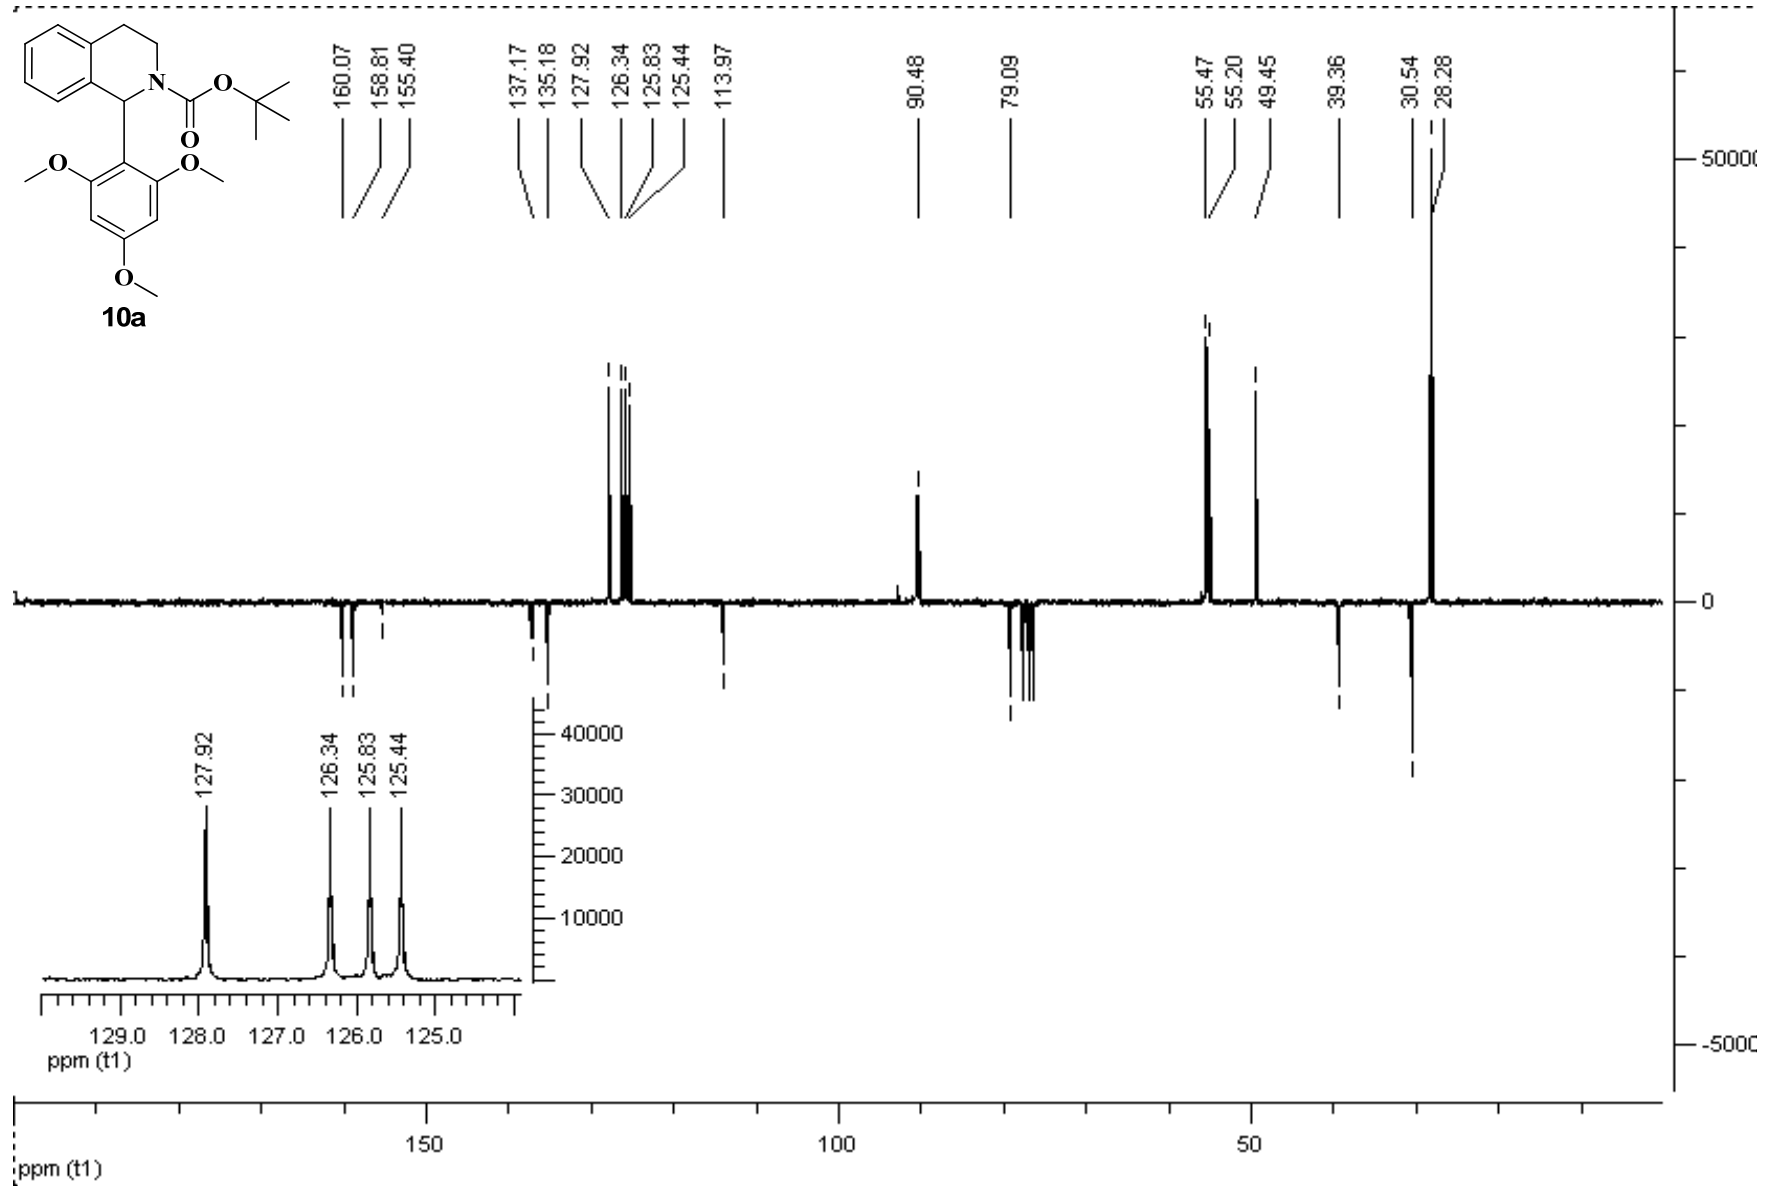

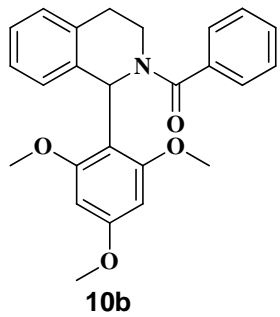

<sup>1</sup>H-NMR recorded at RT in CDCl<sub>3</sub>

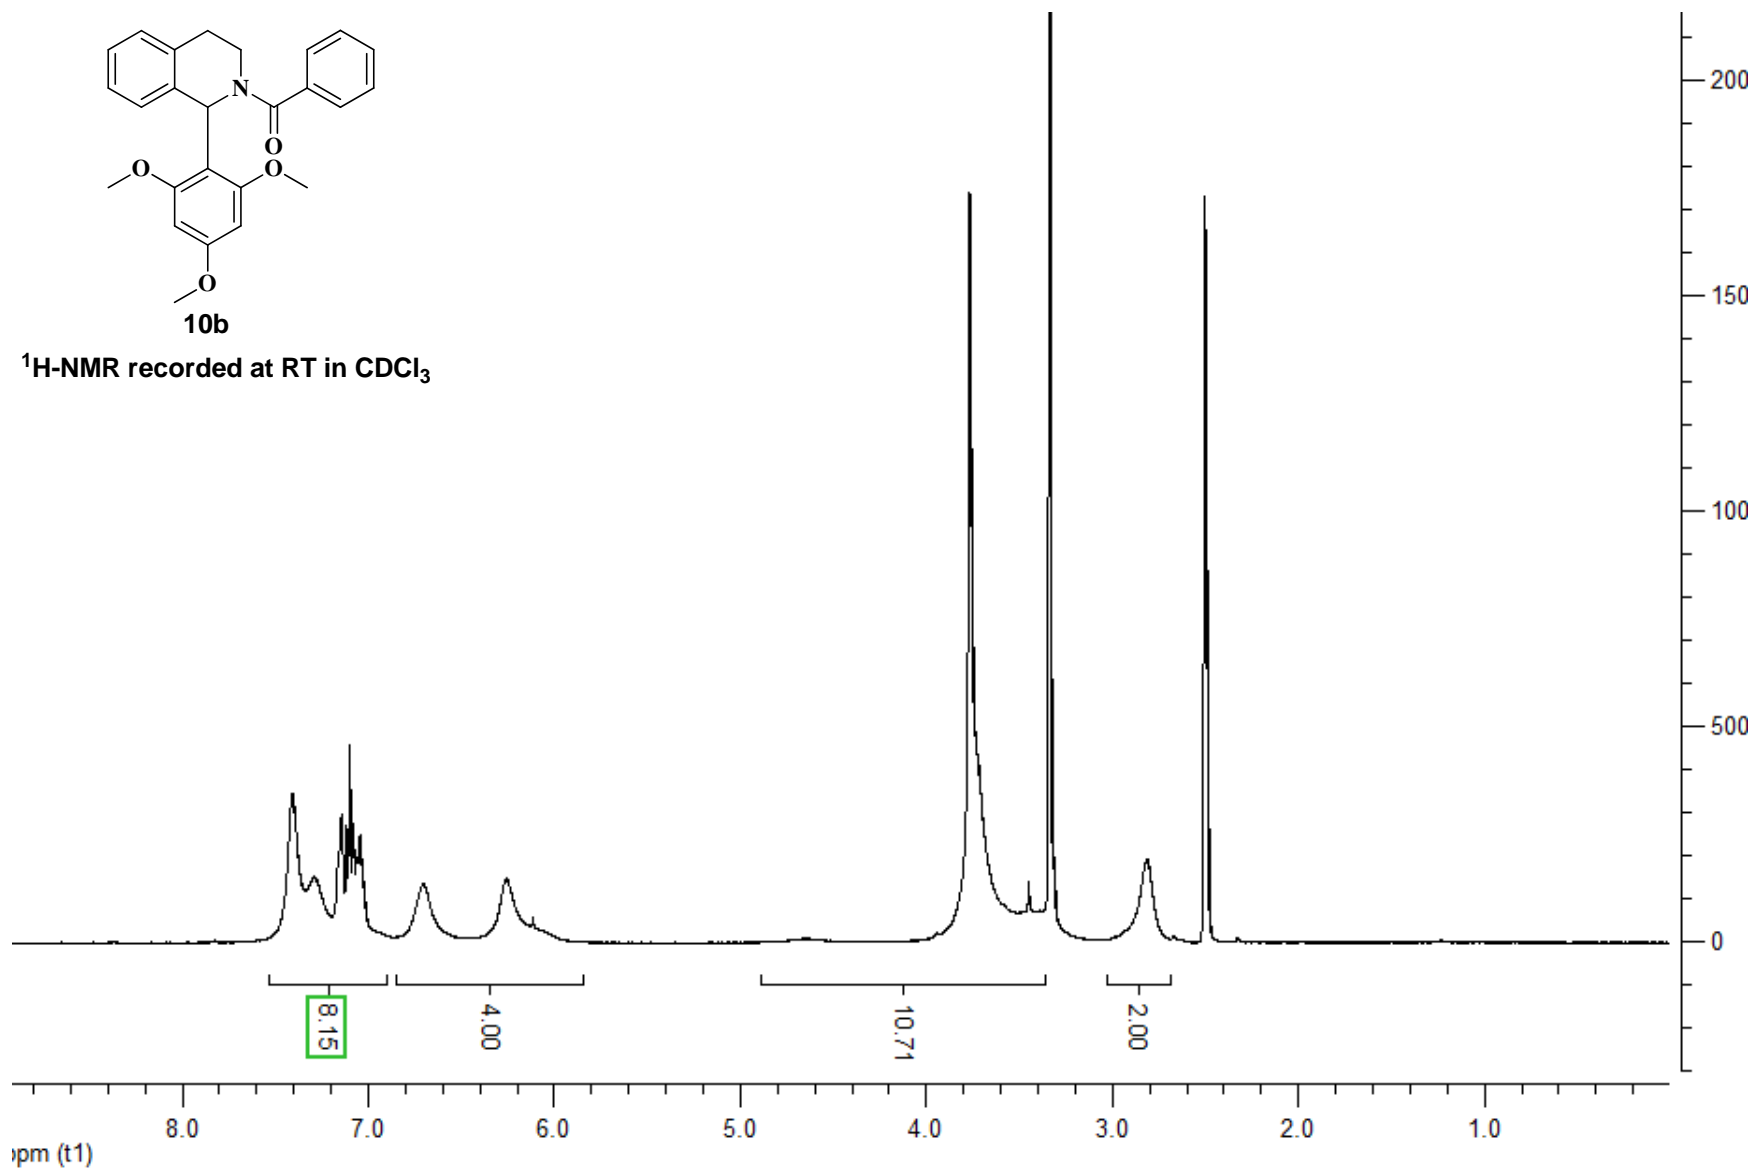

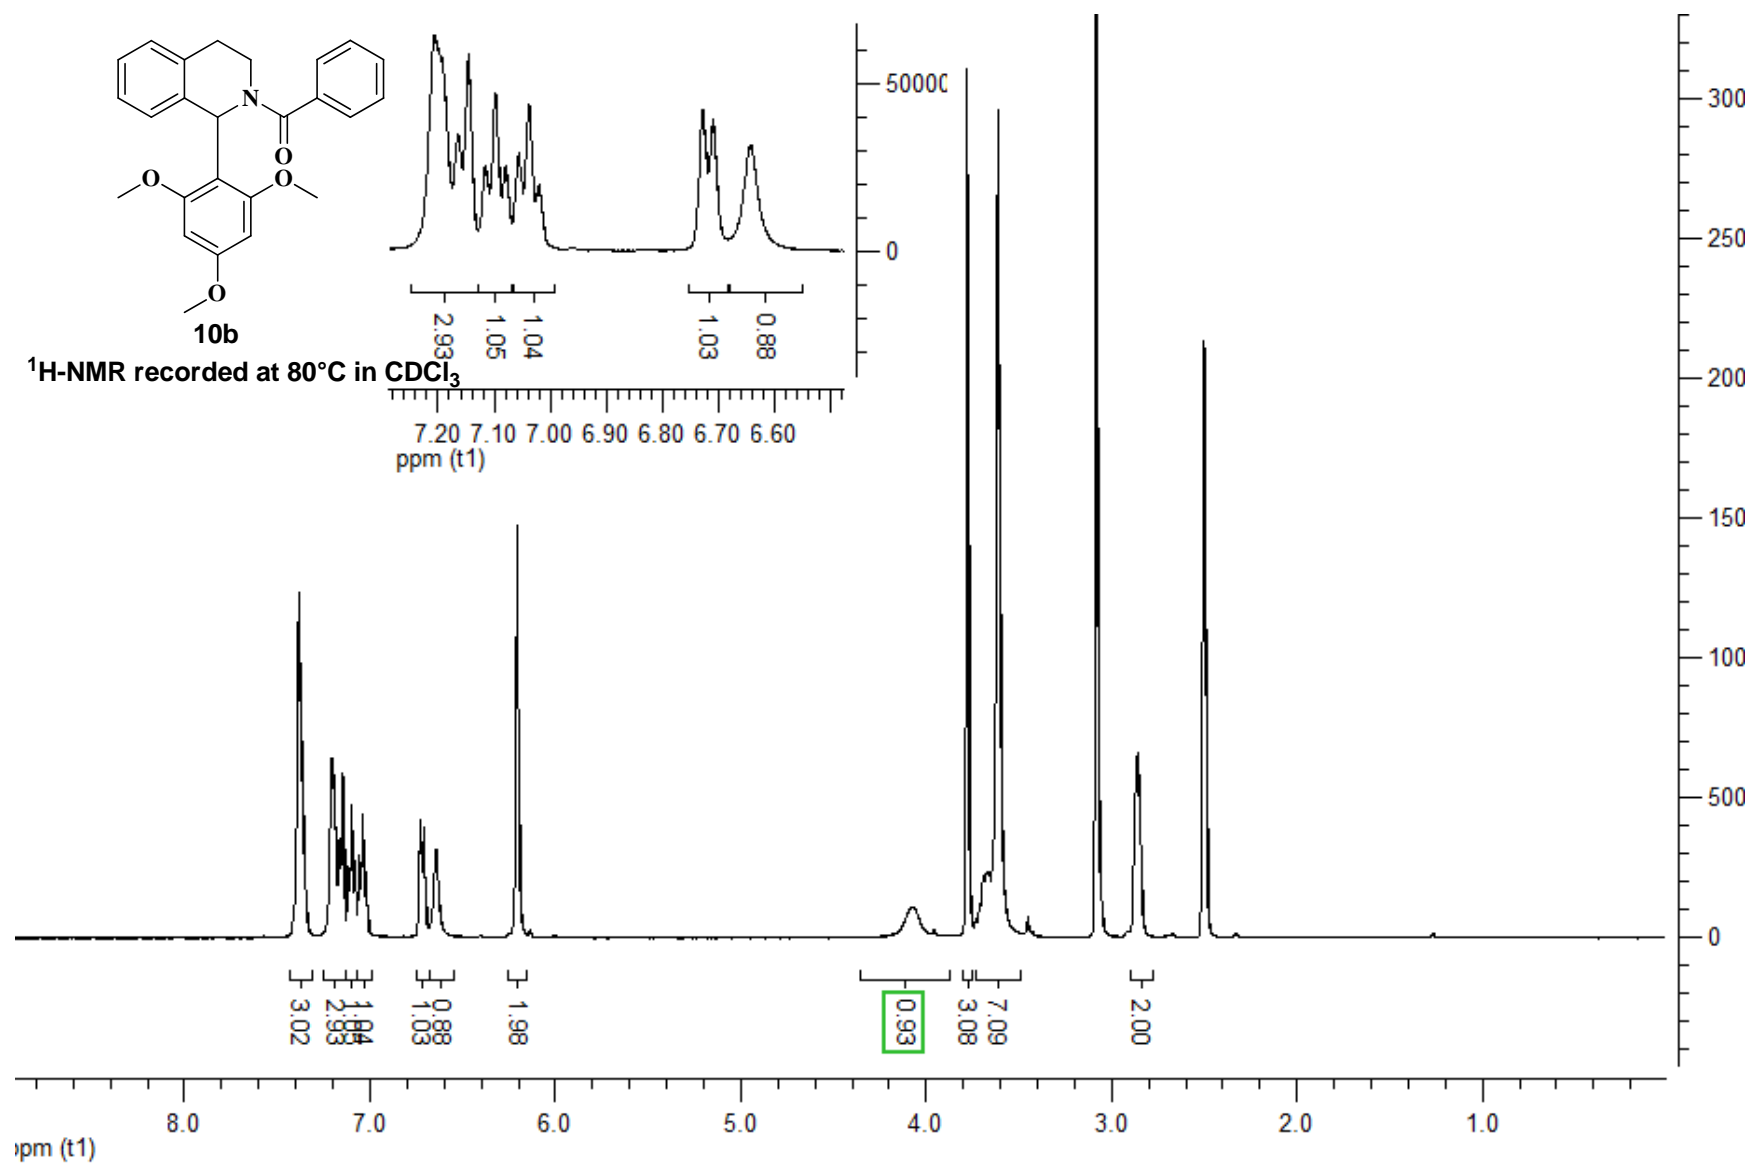

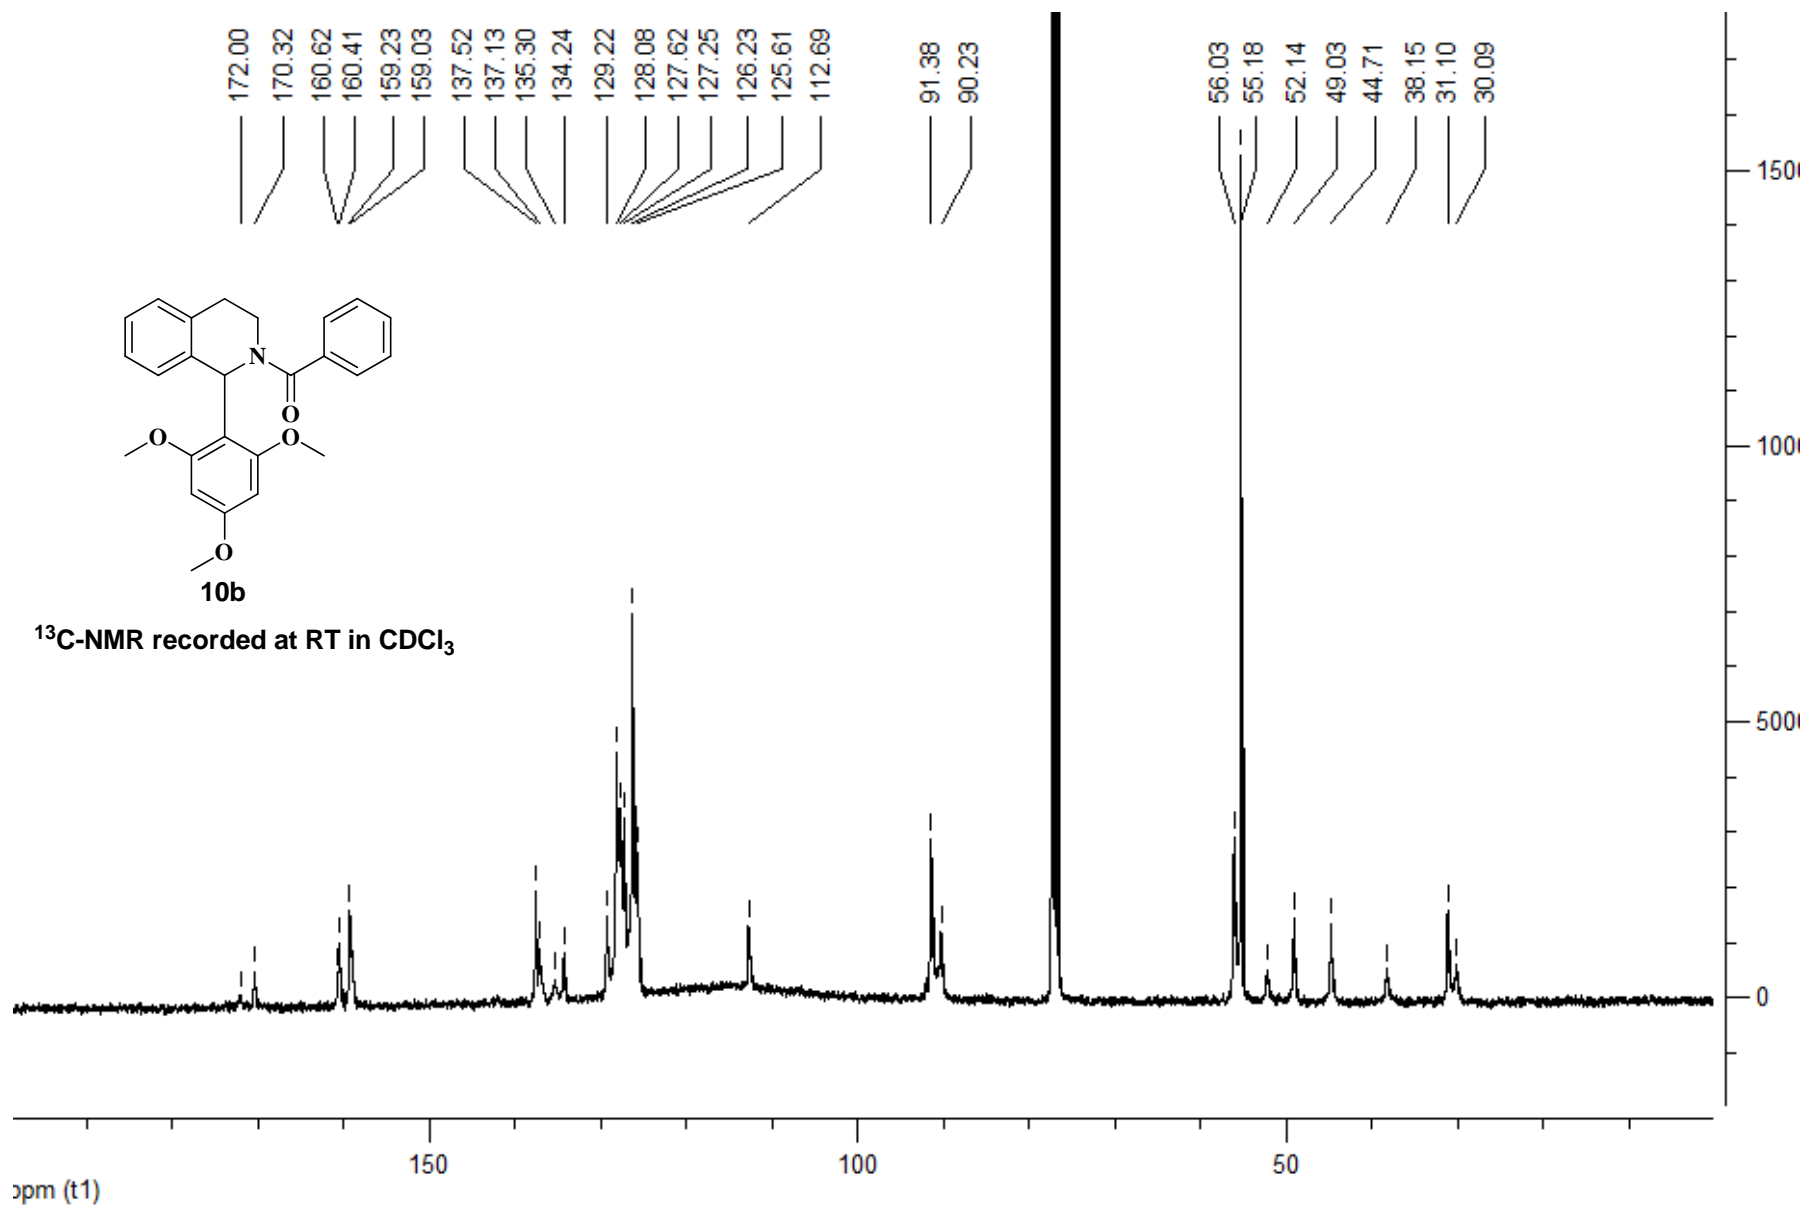

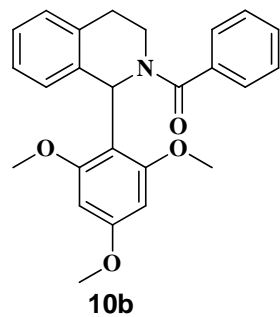

DEPT-NMR recorded at RT in CDCl<sub>3</sub>

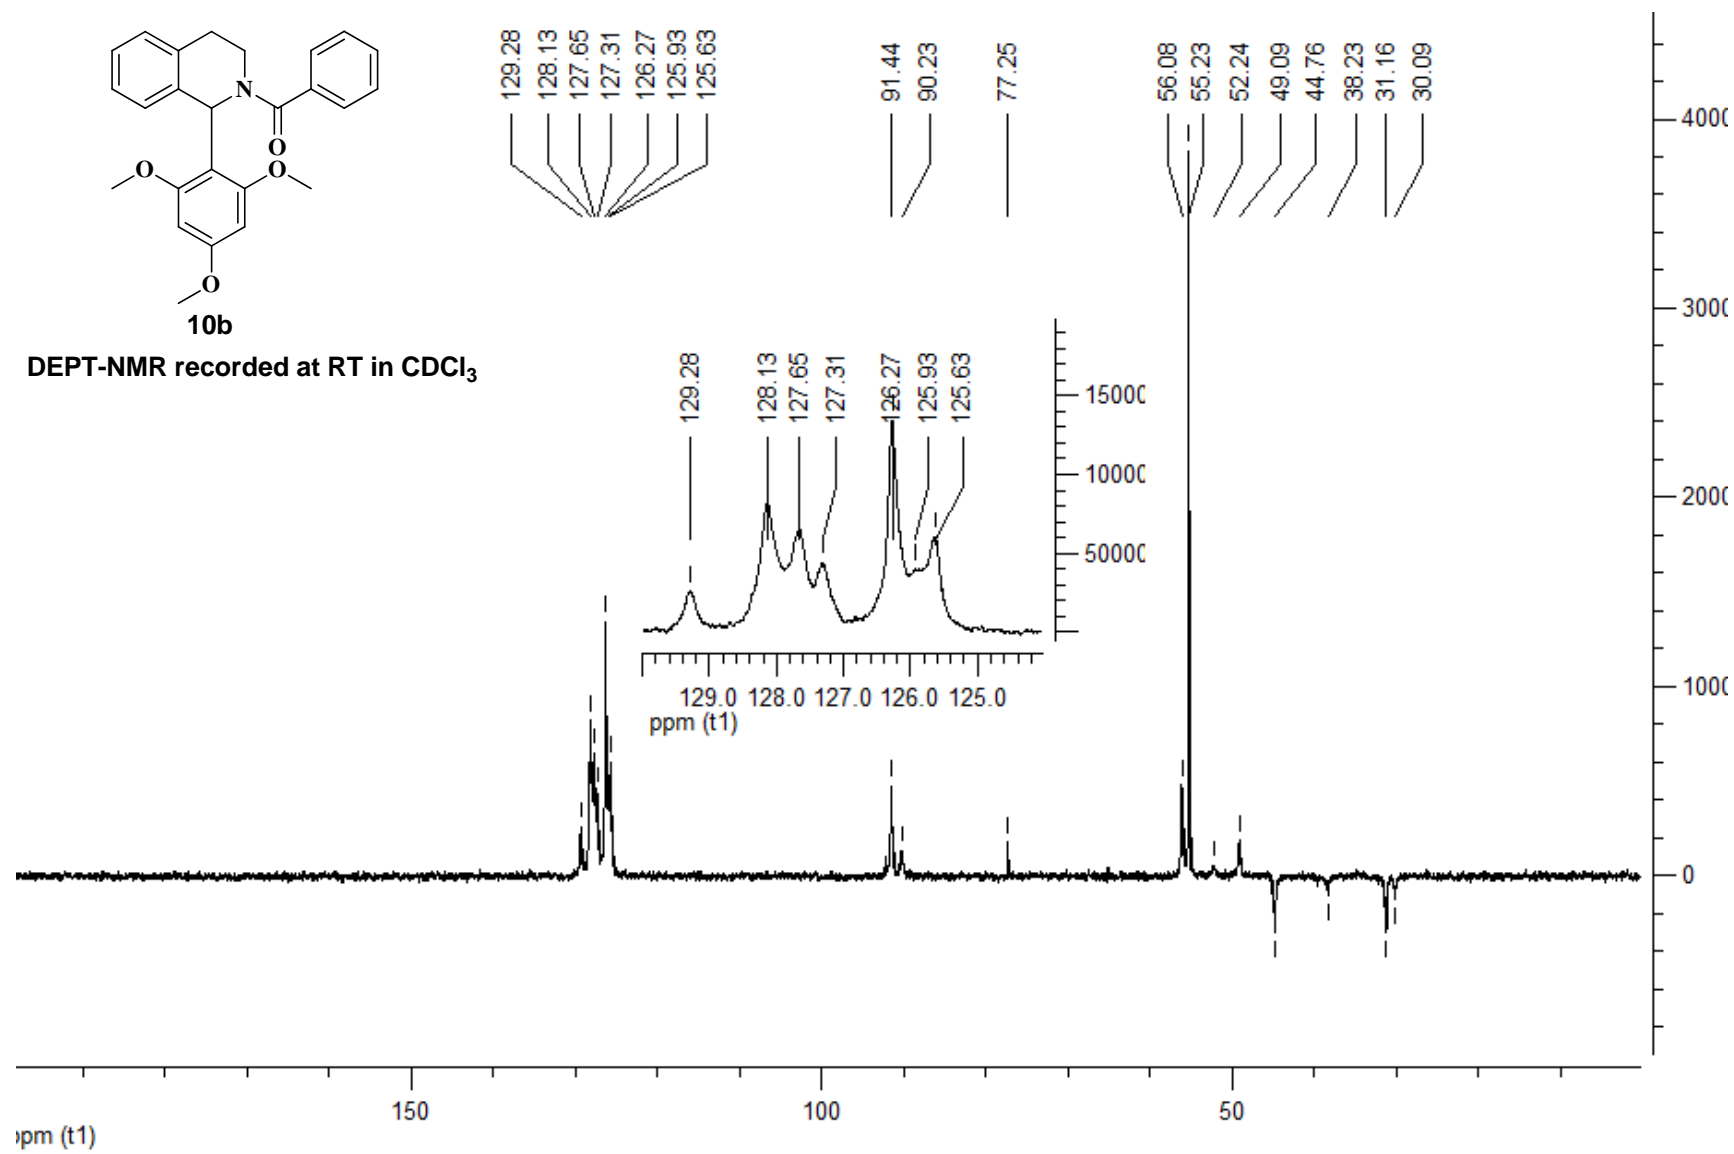

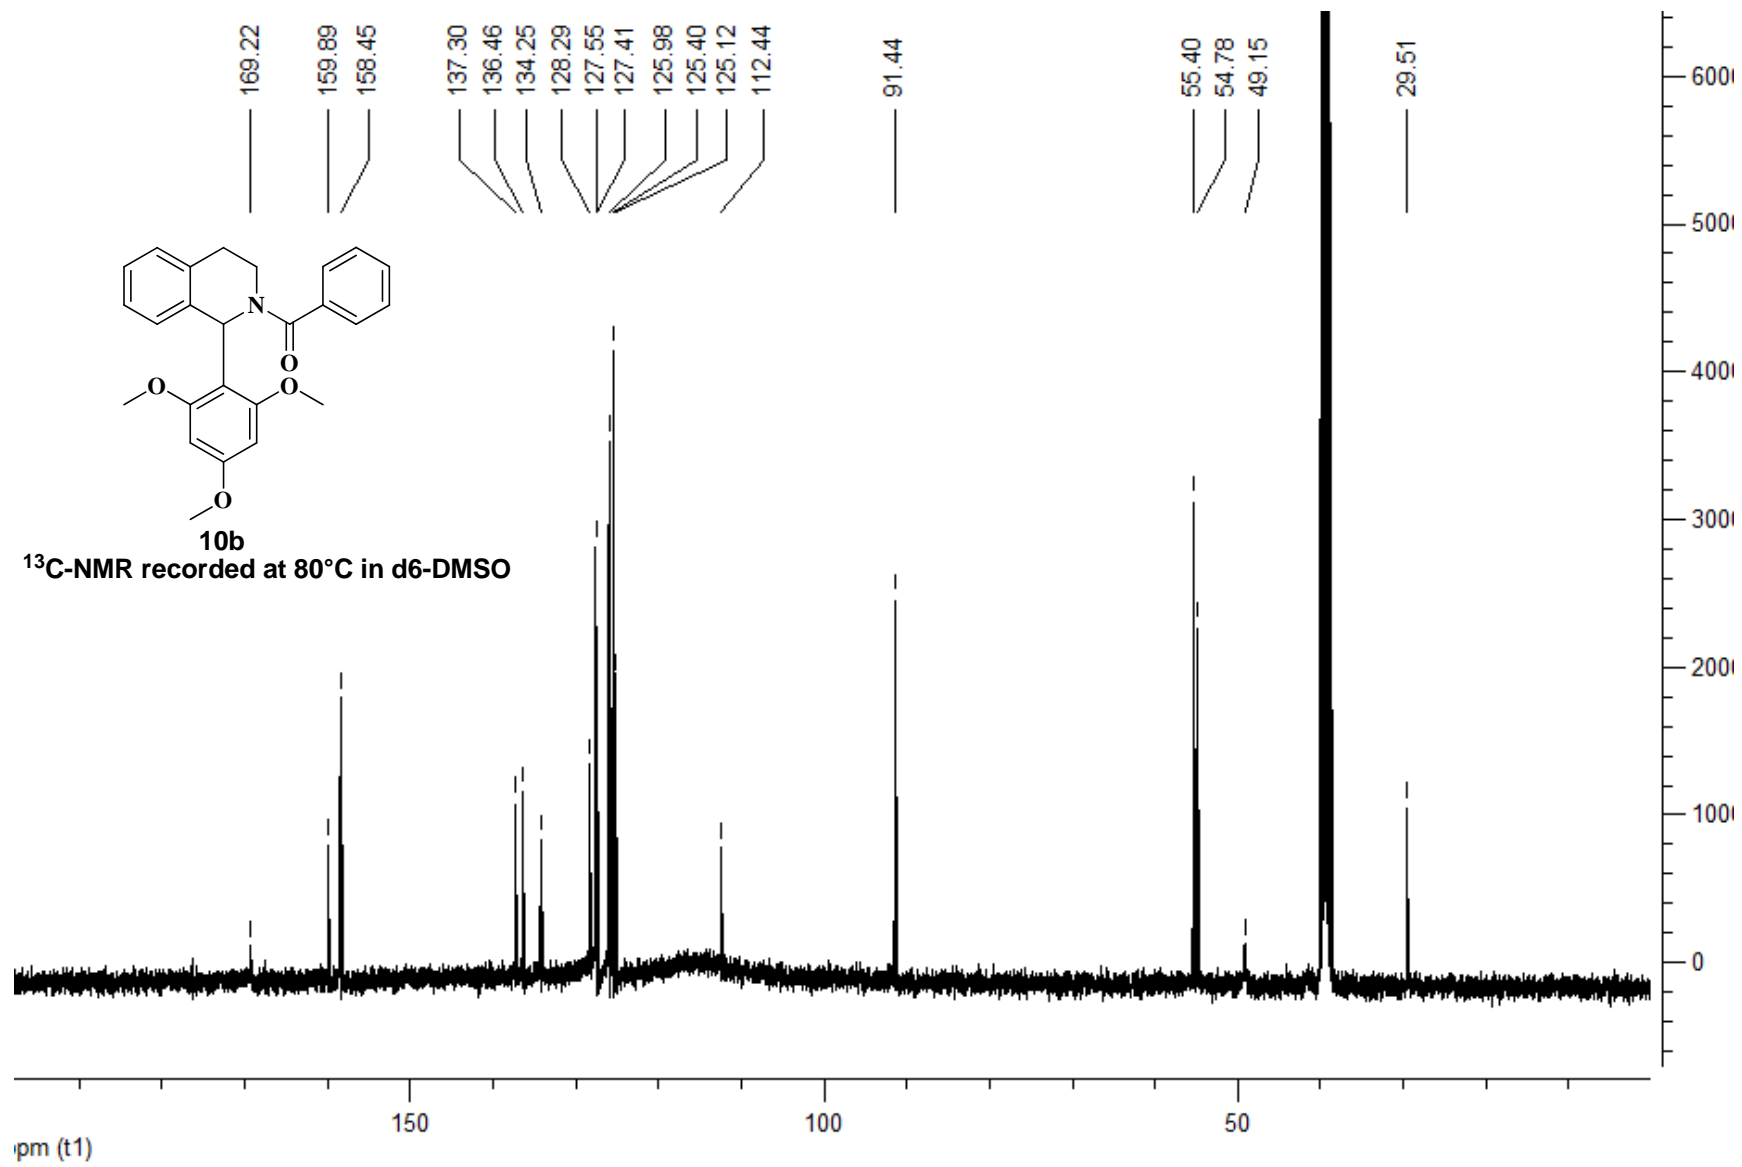

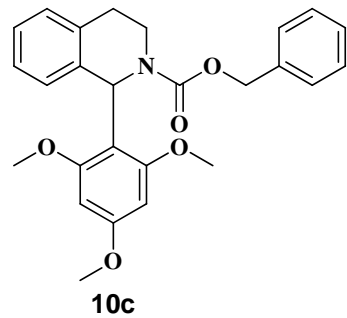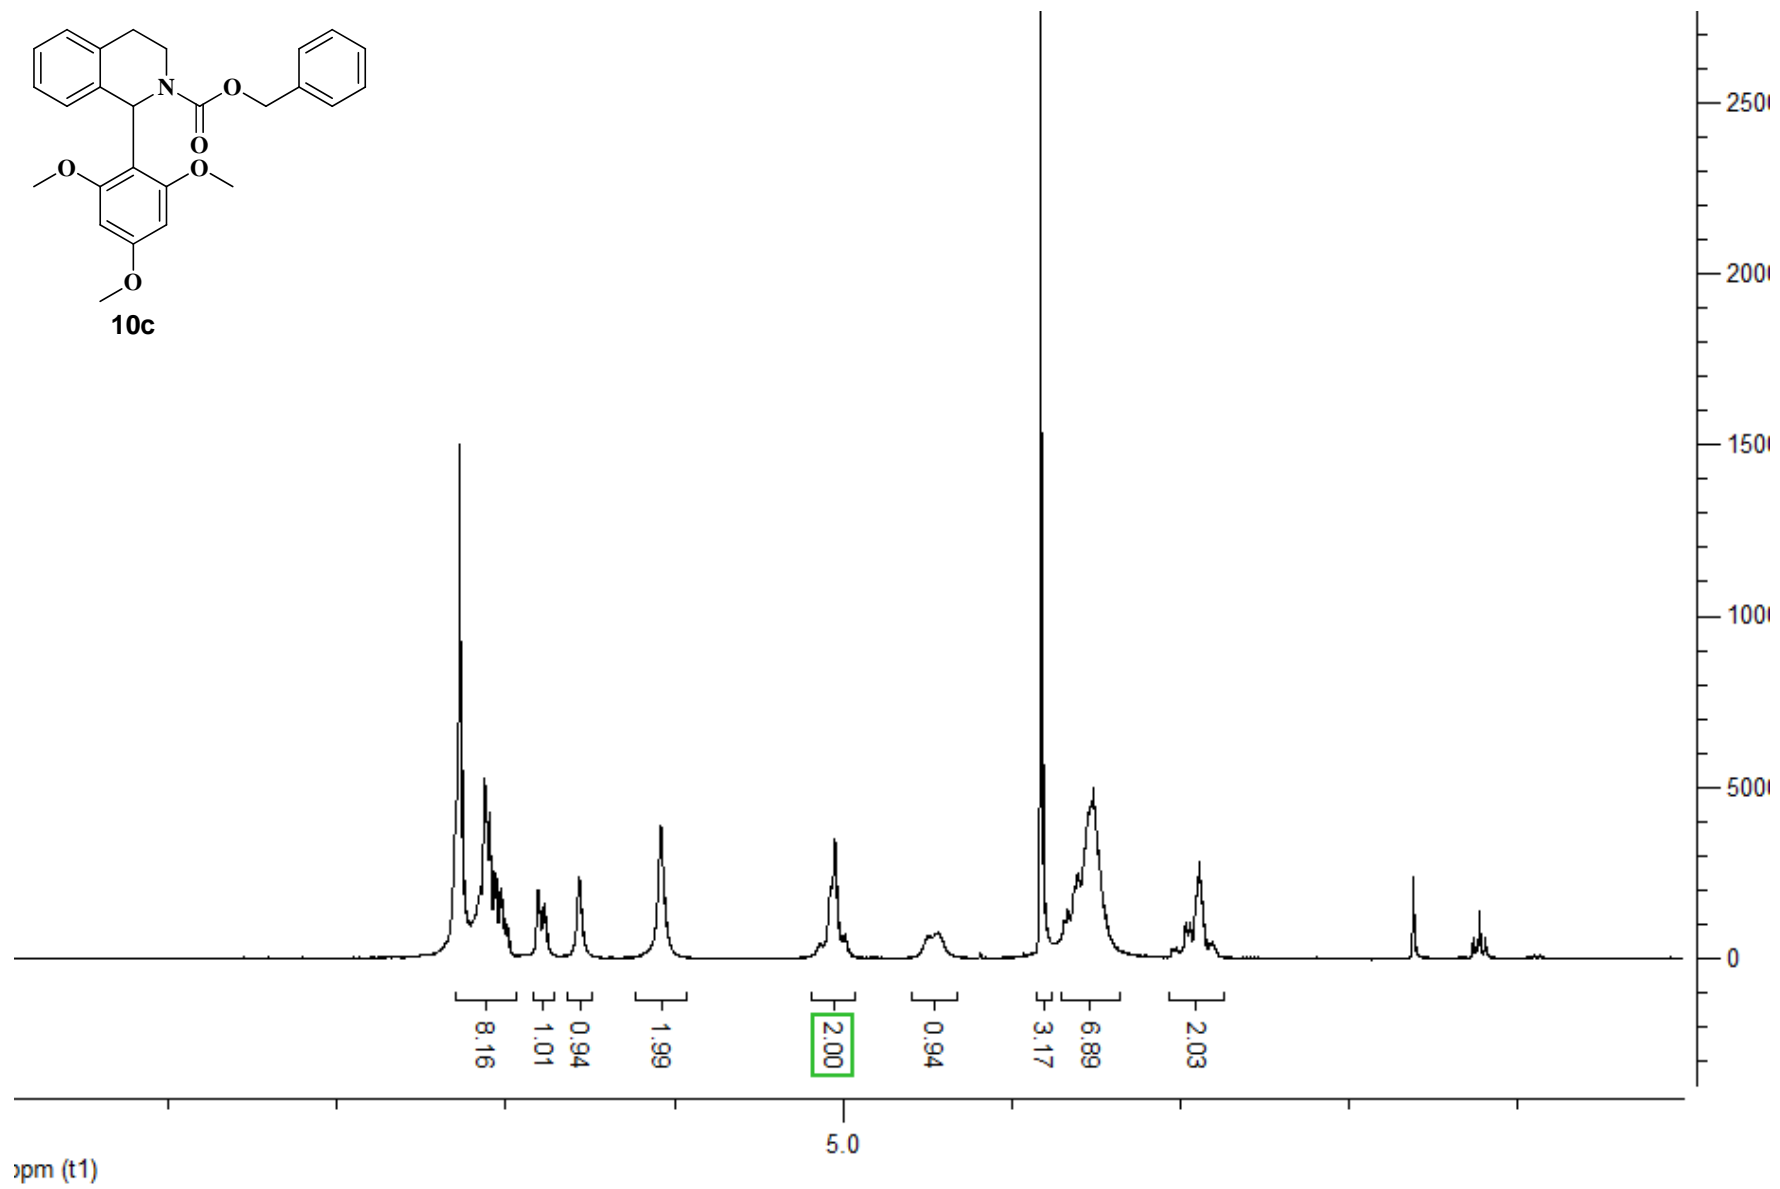

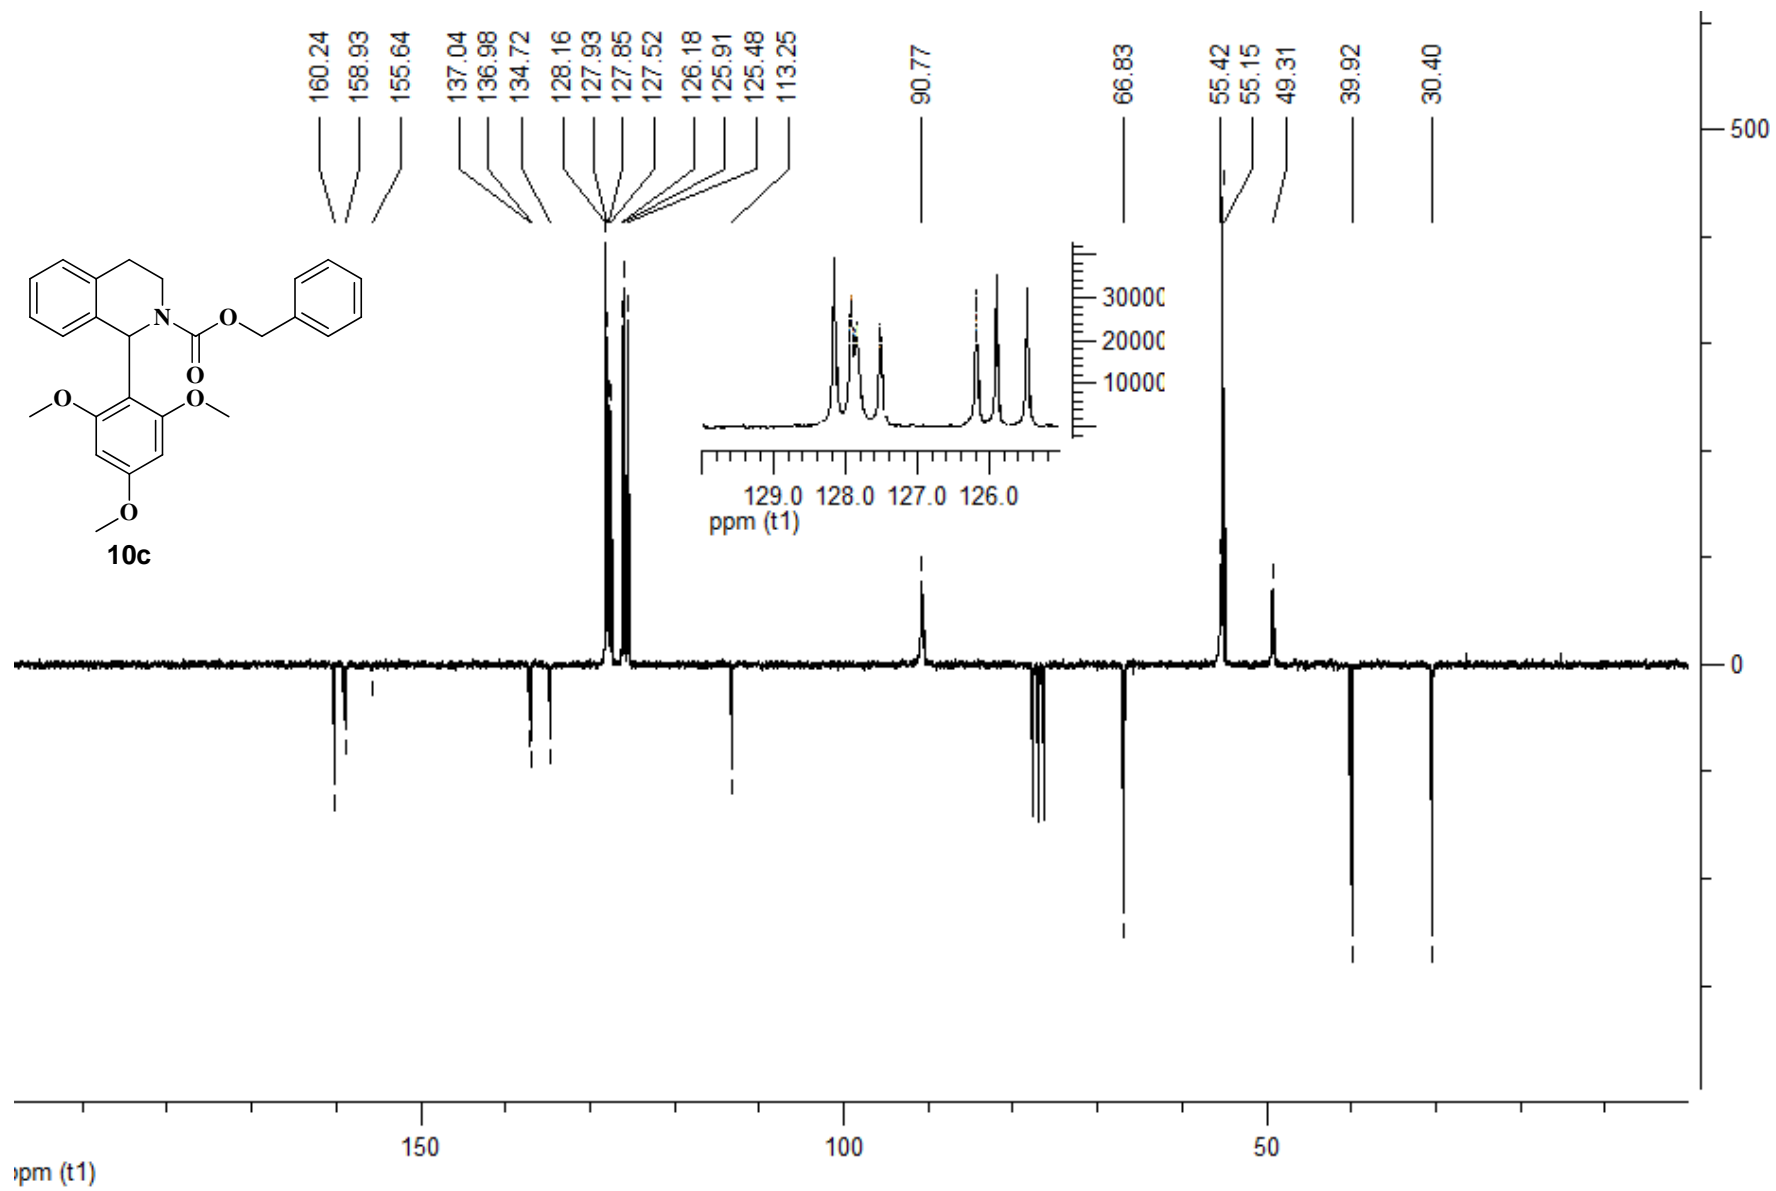



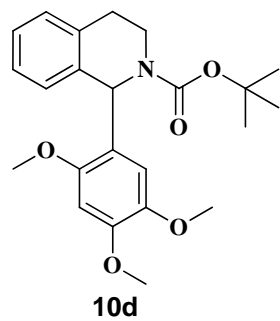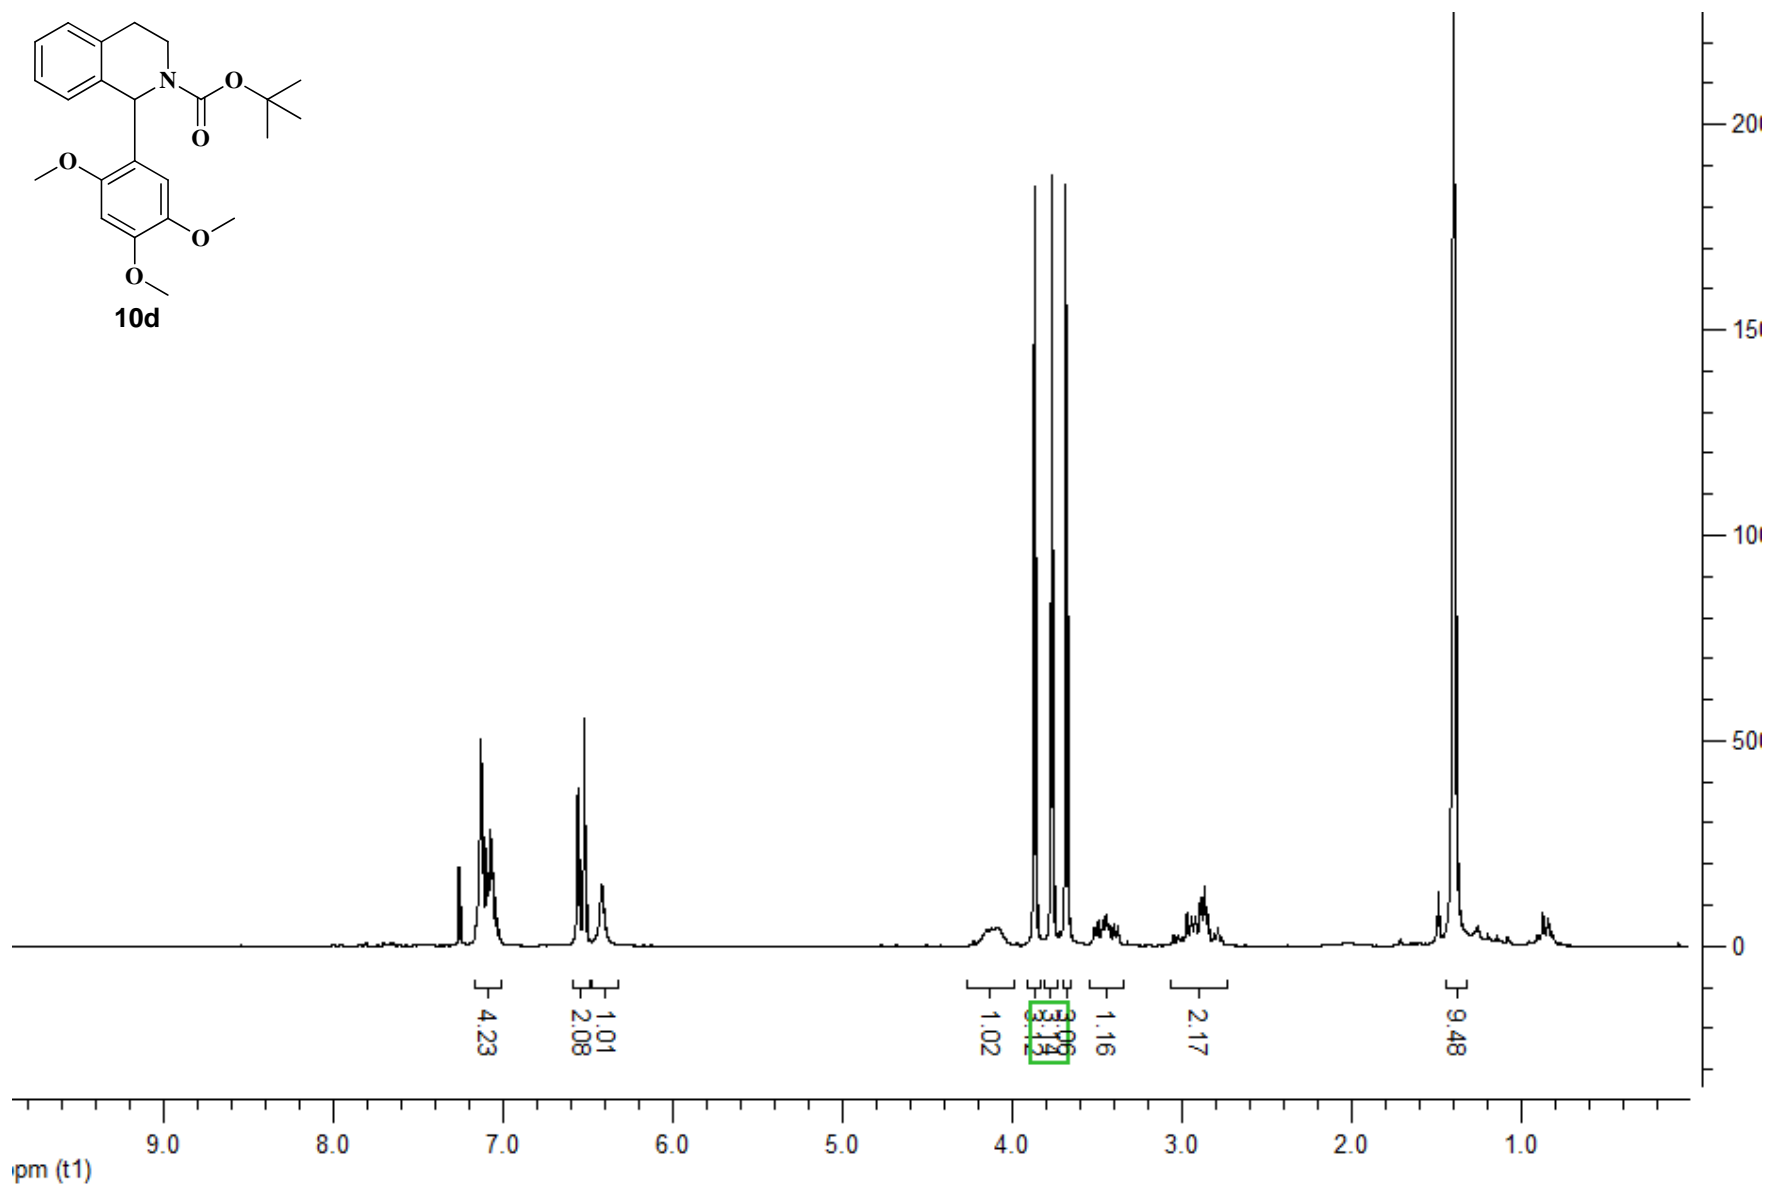

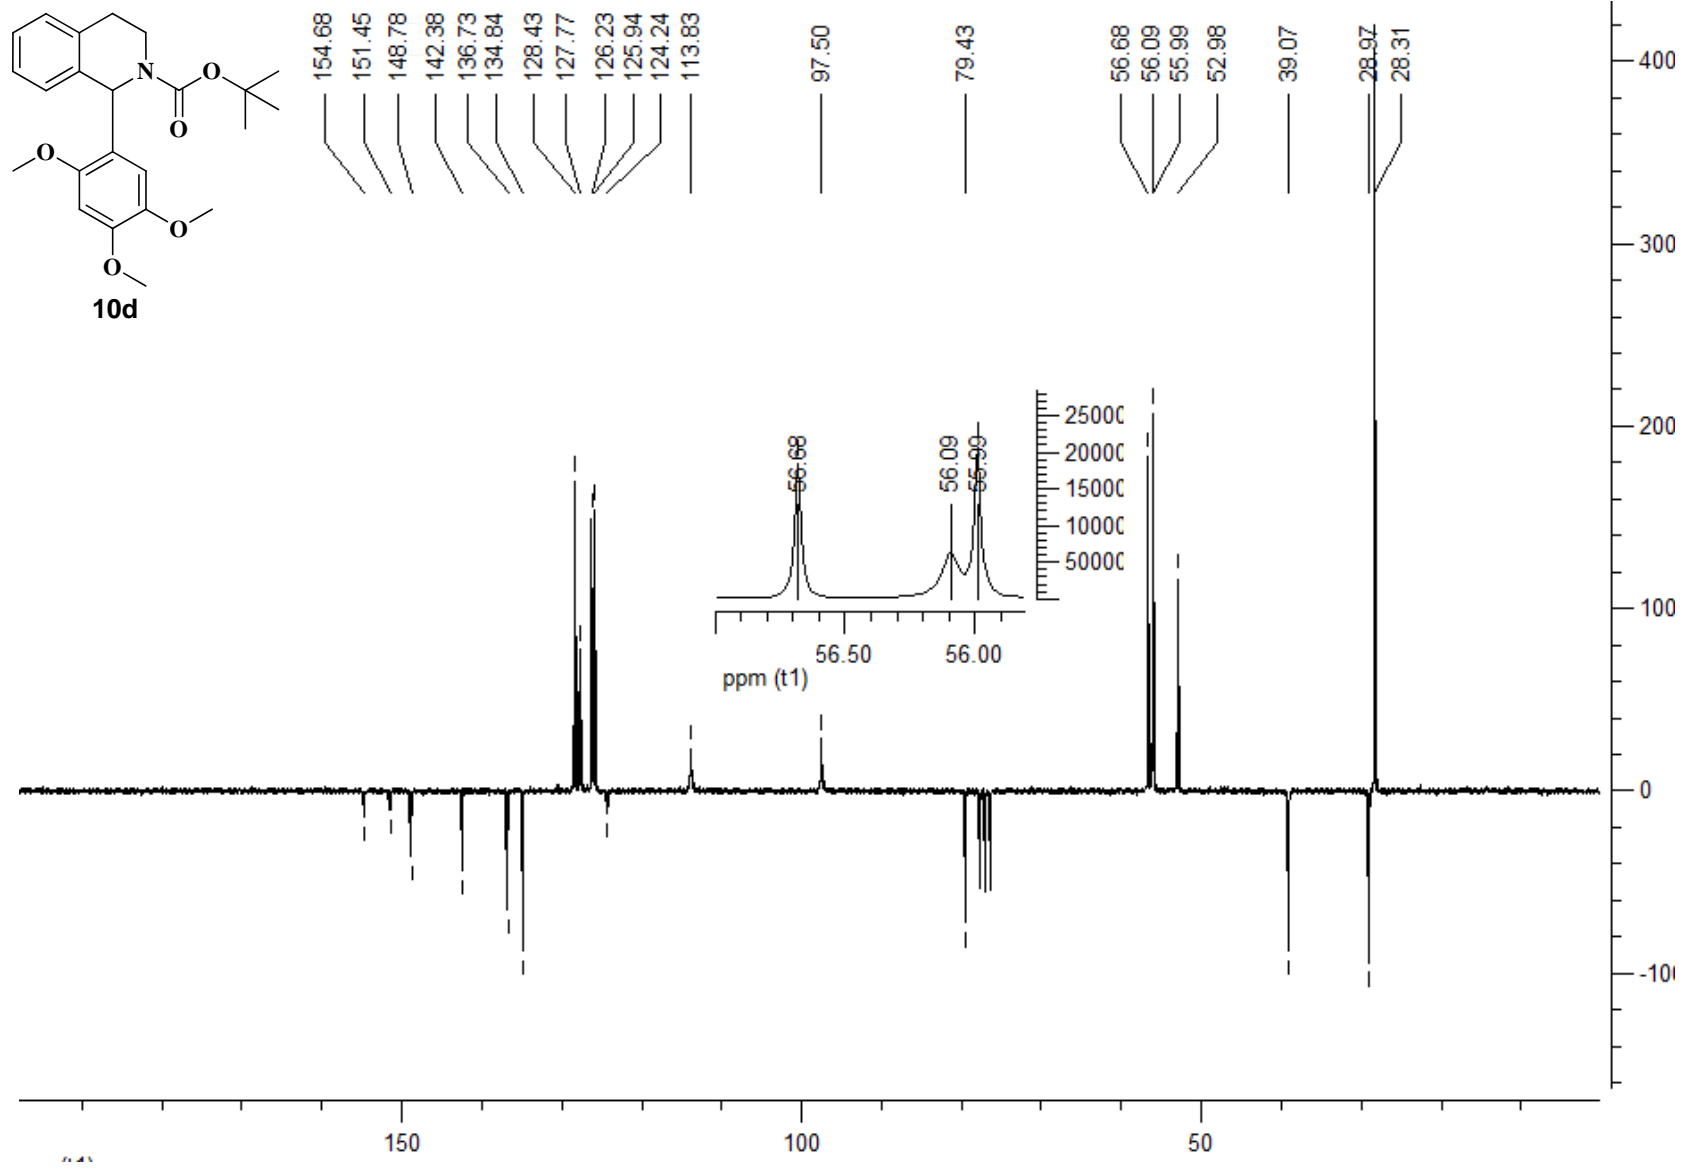

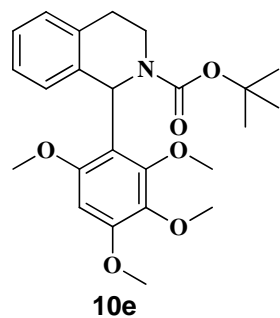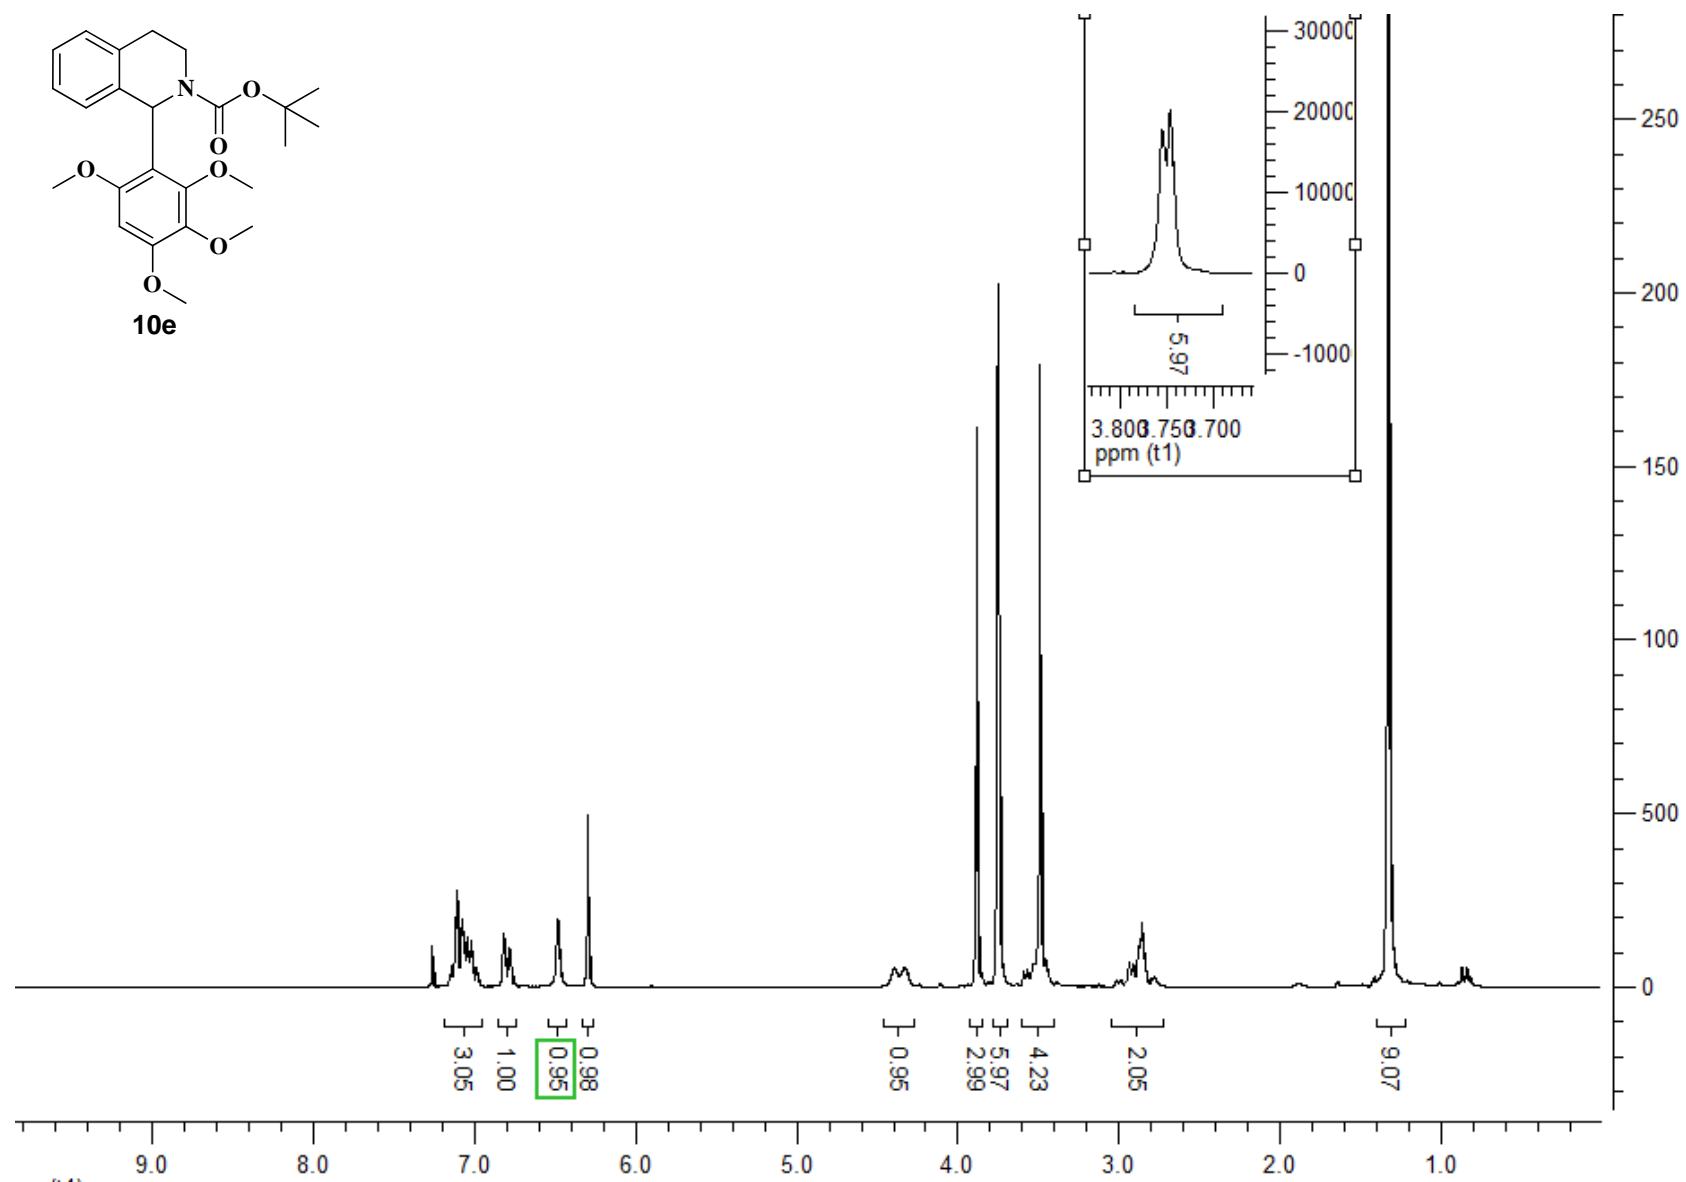

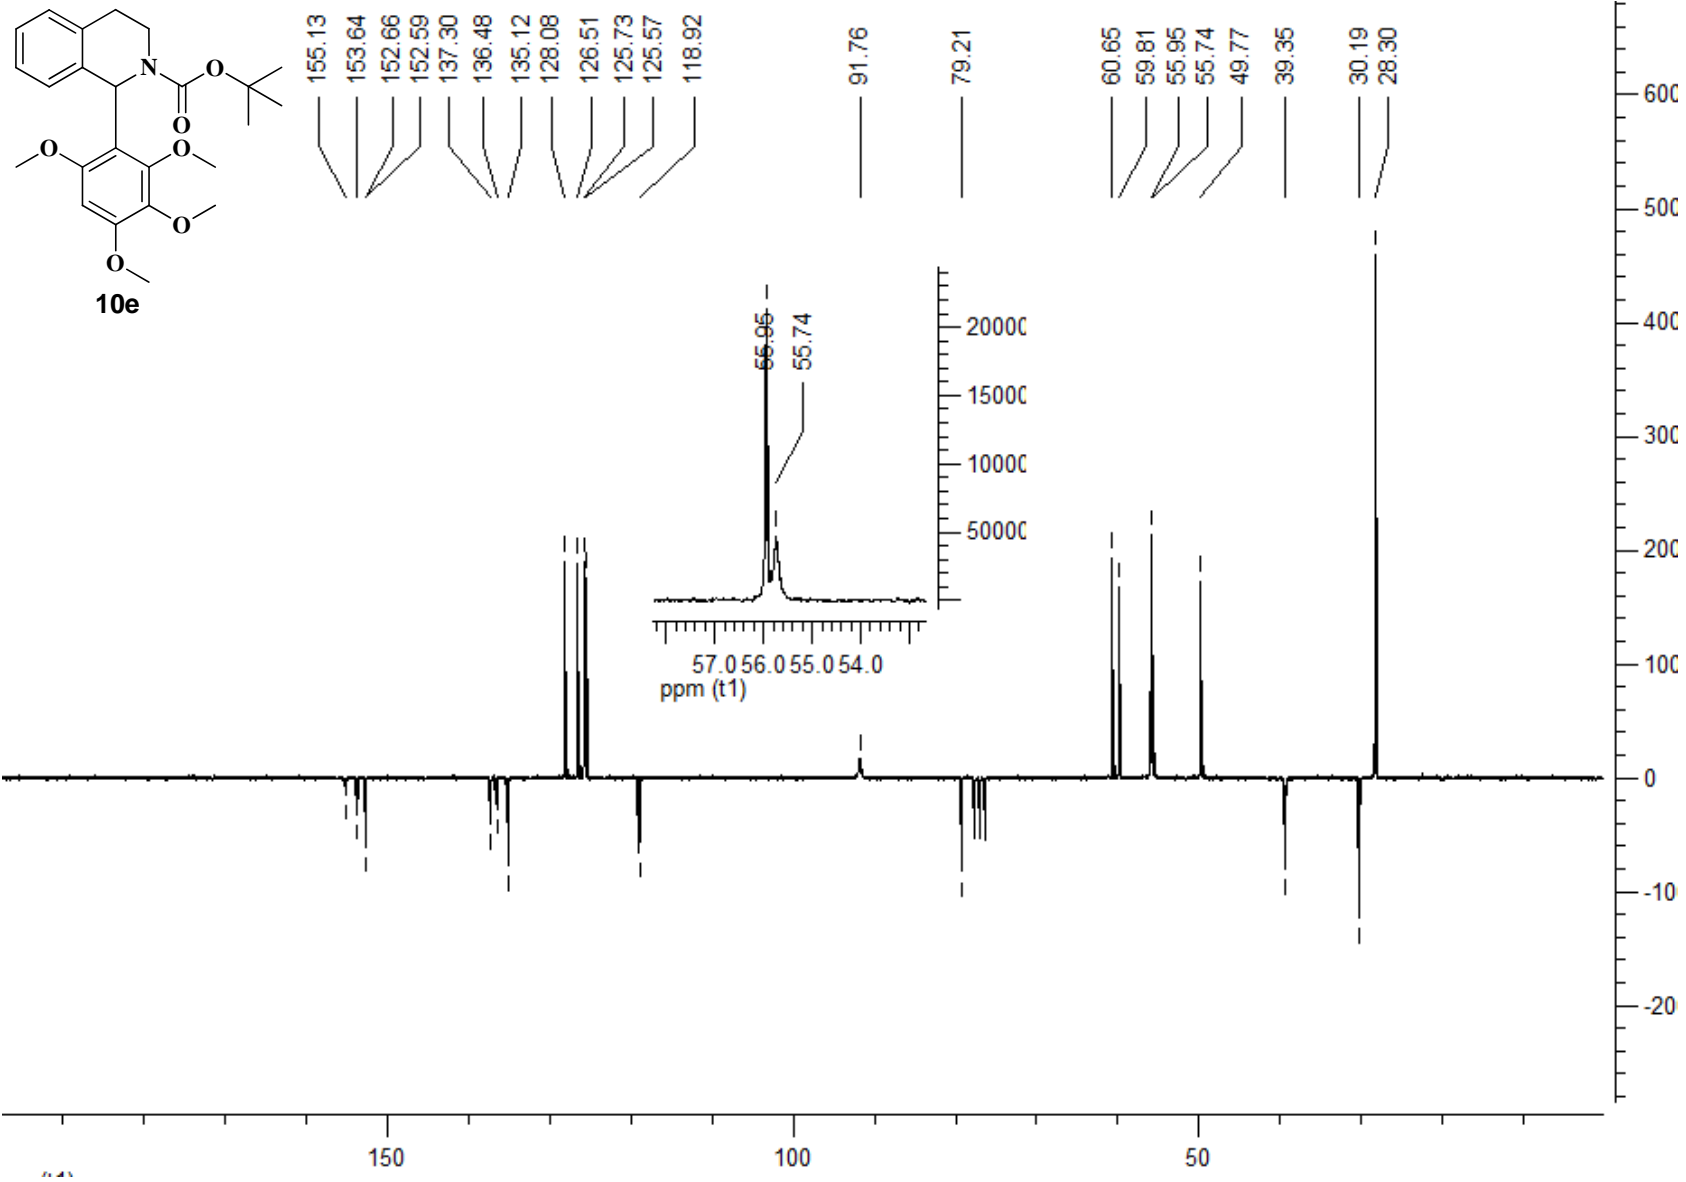

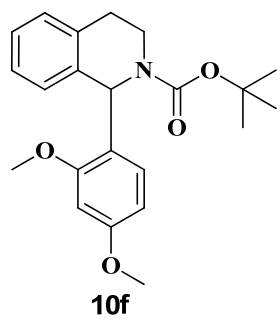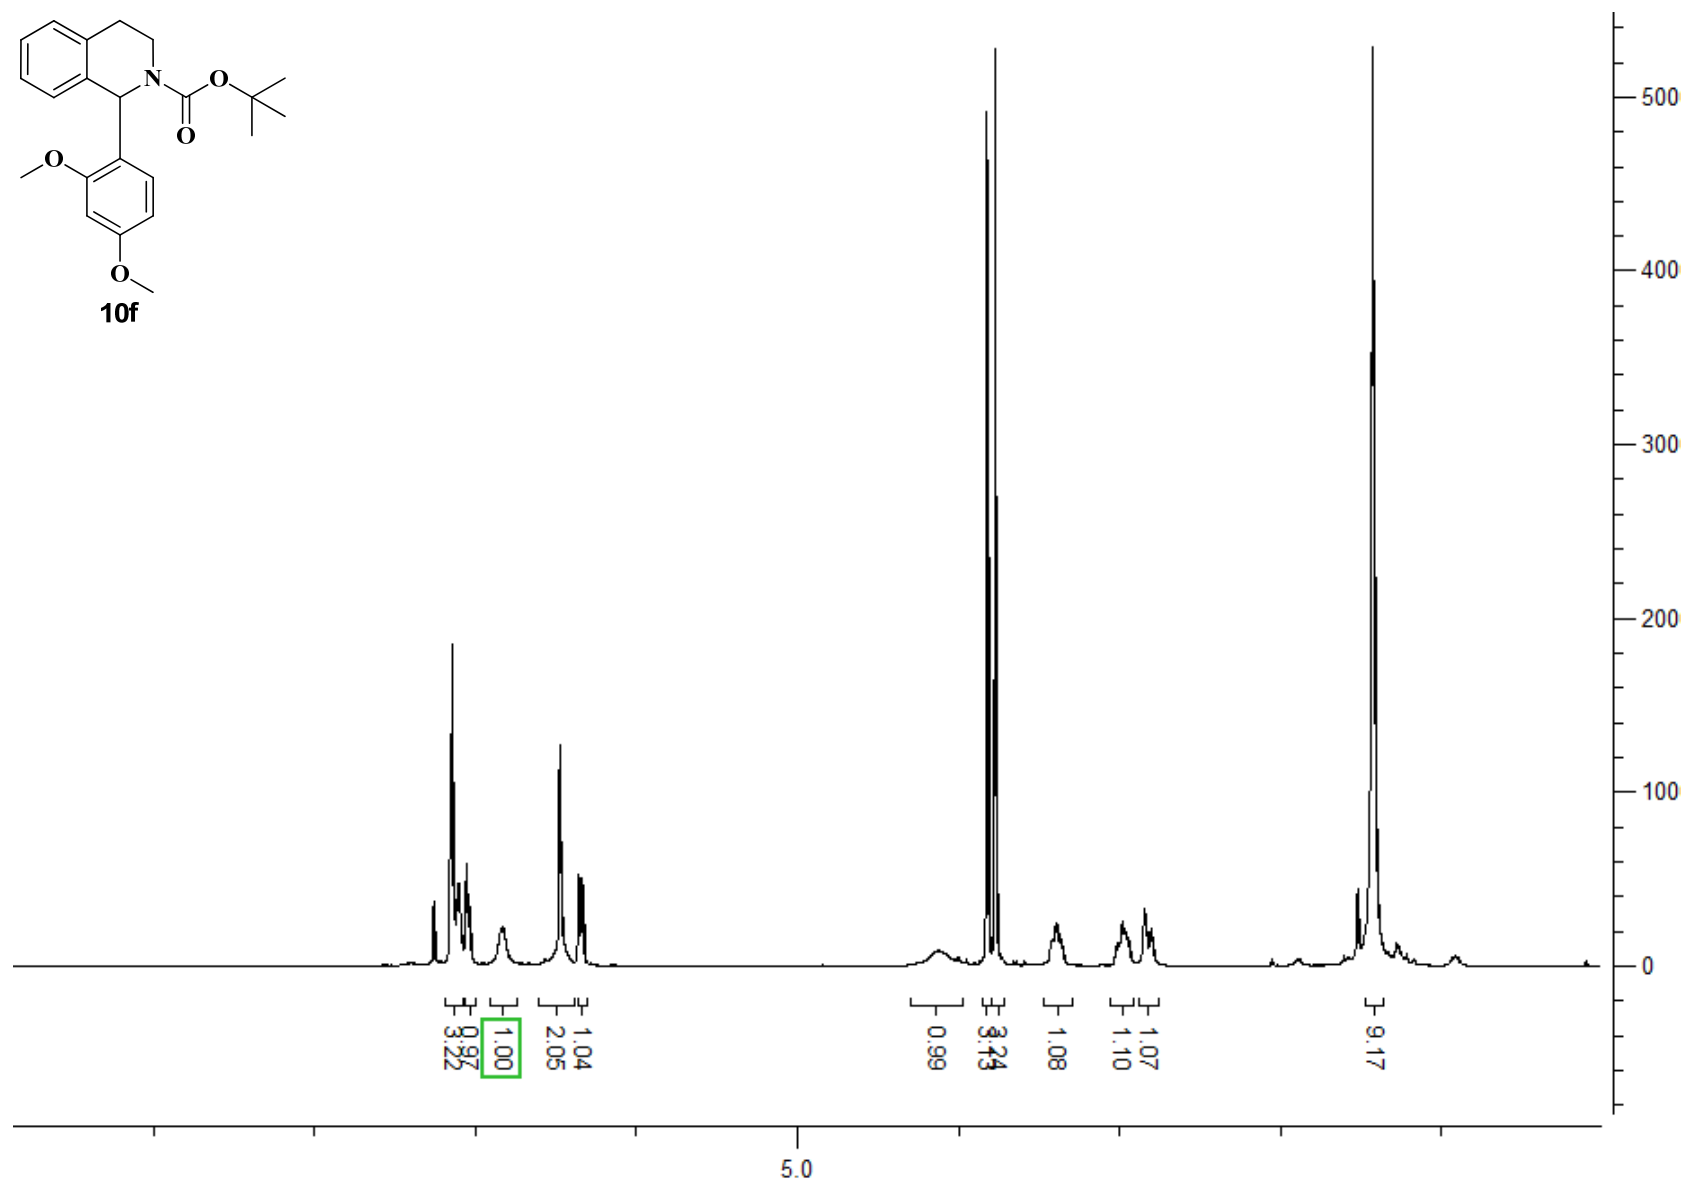

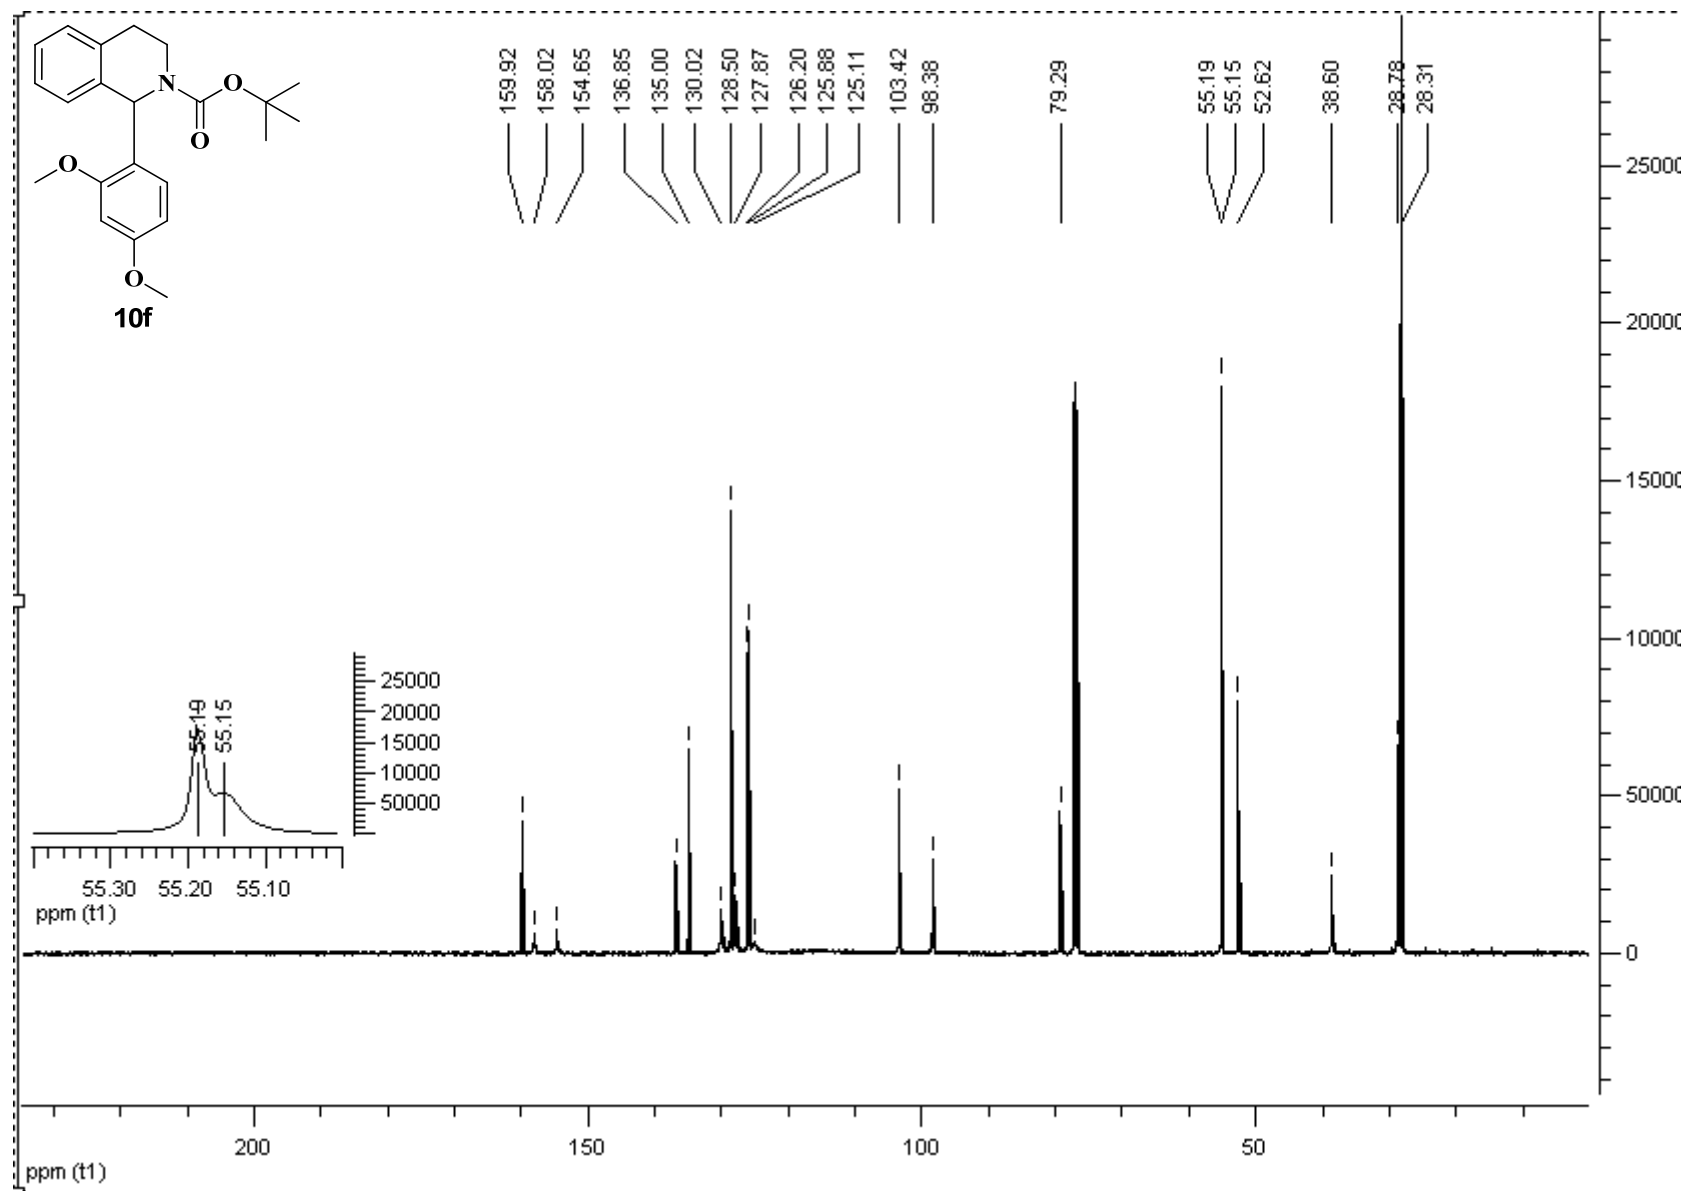

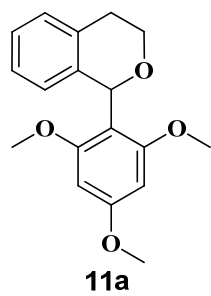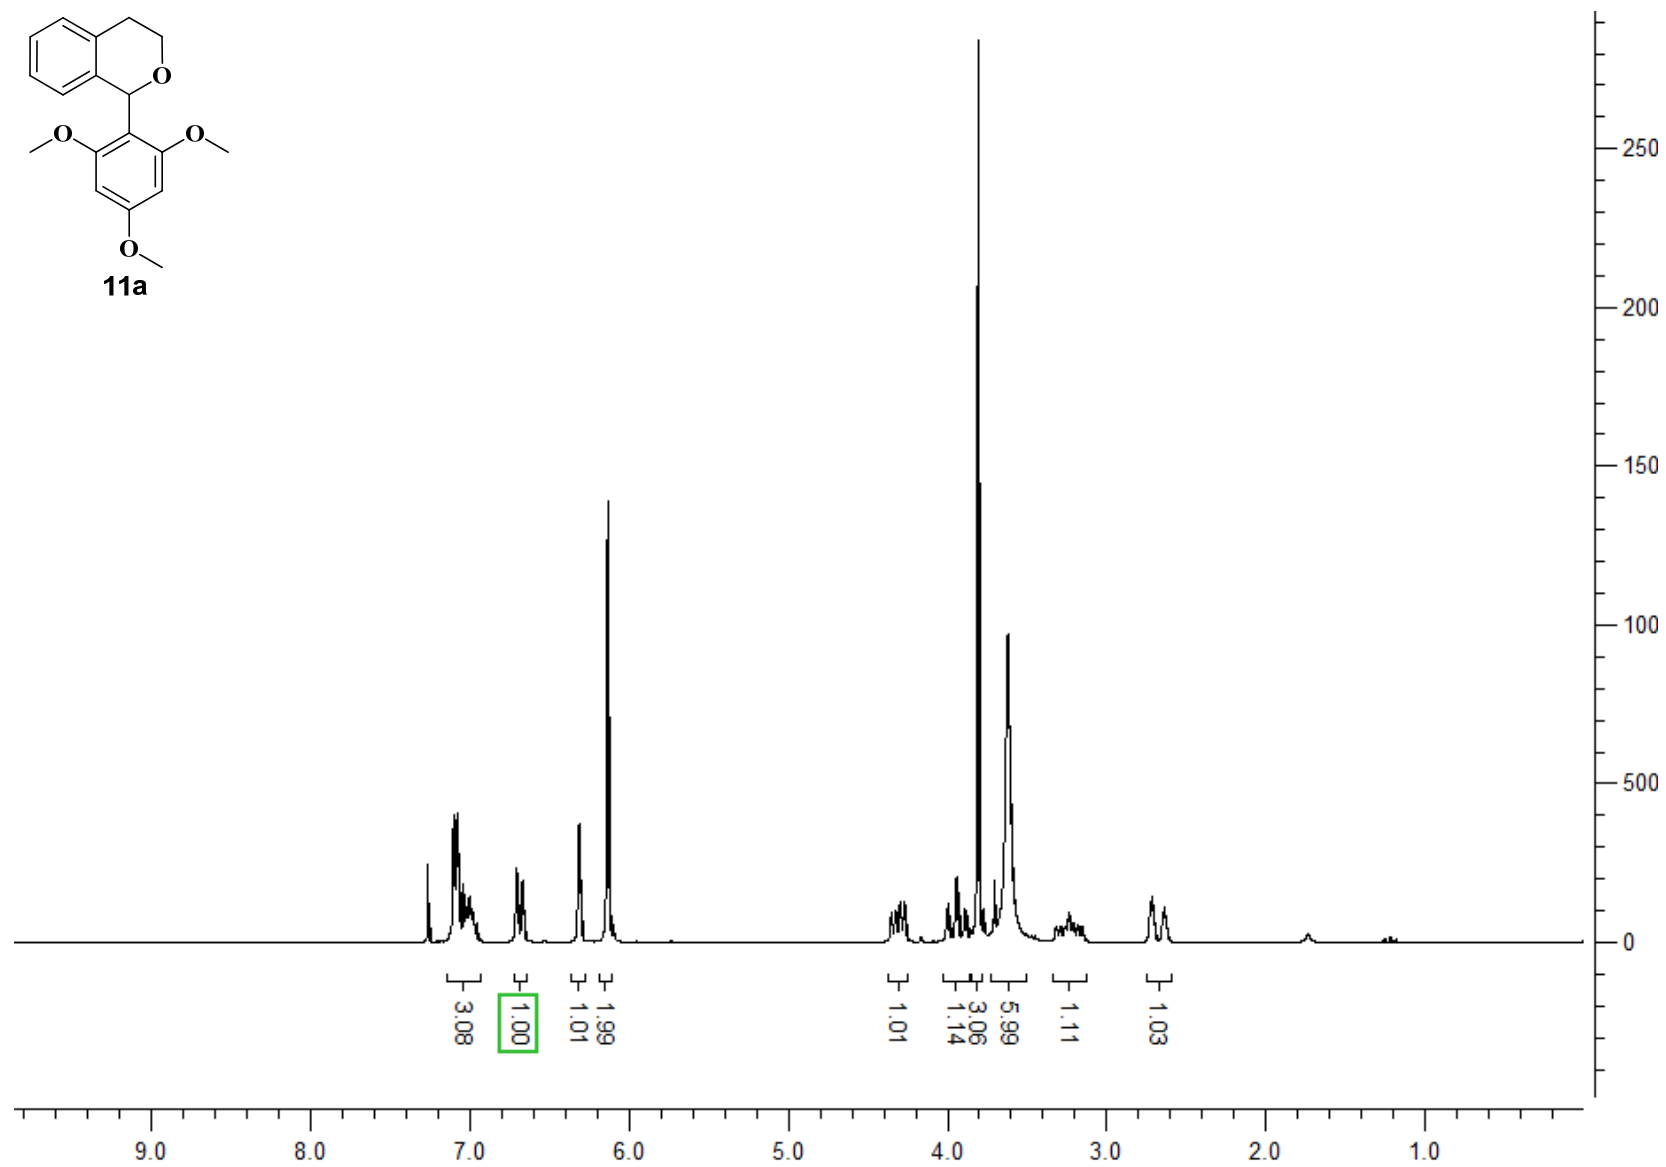

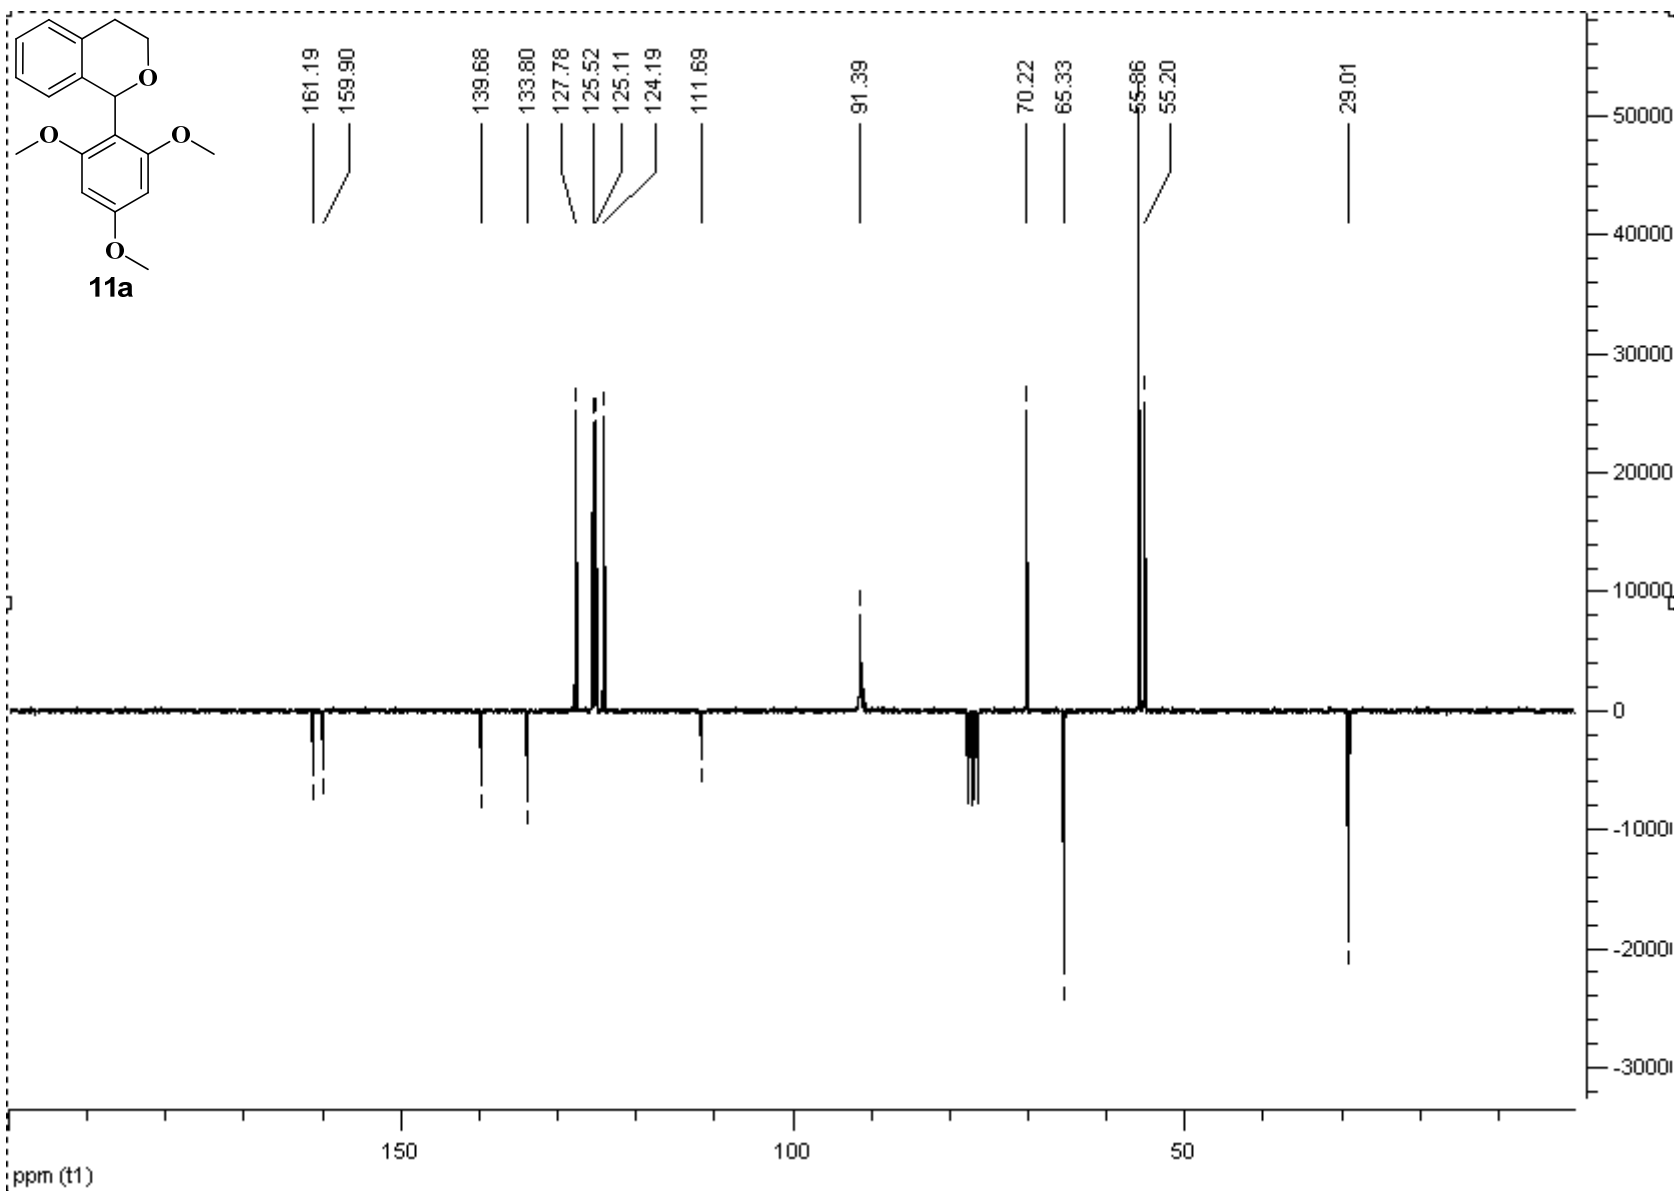



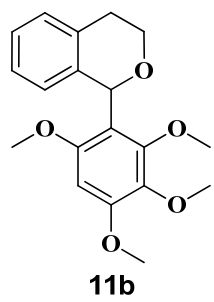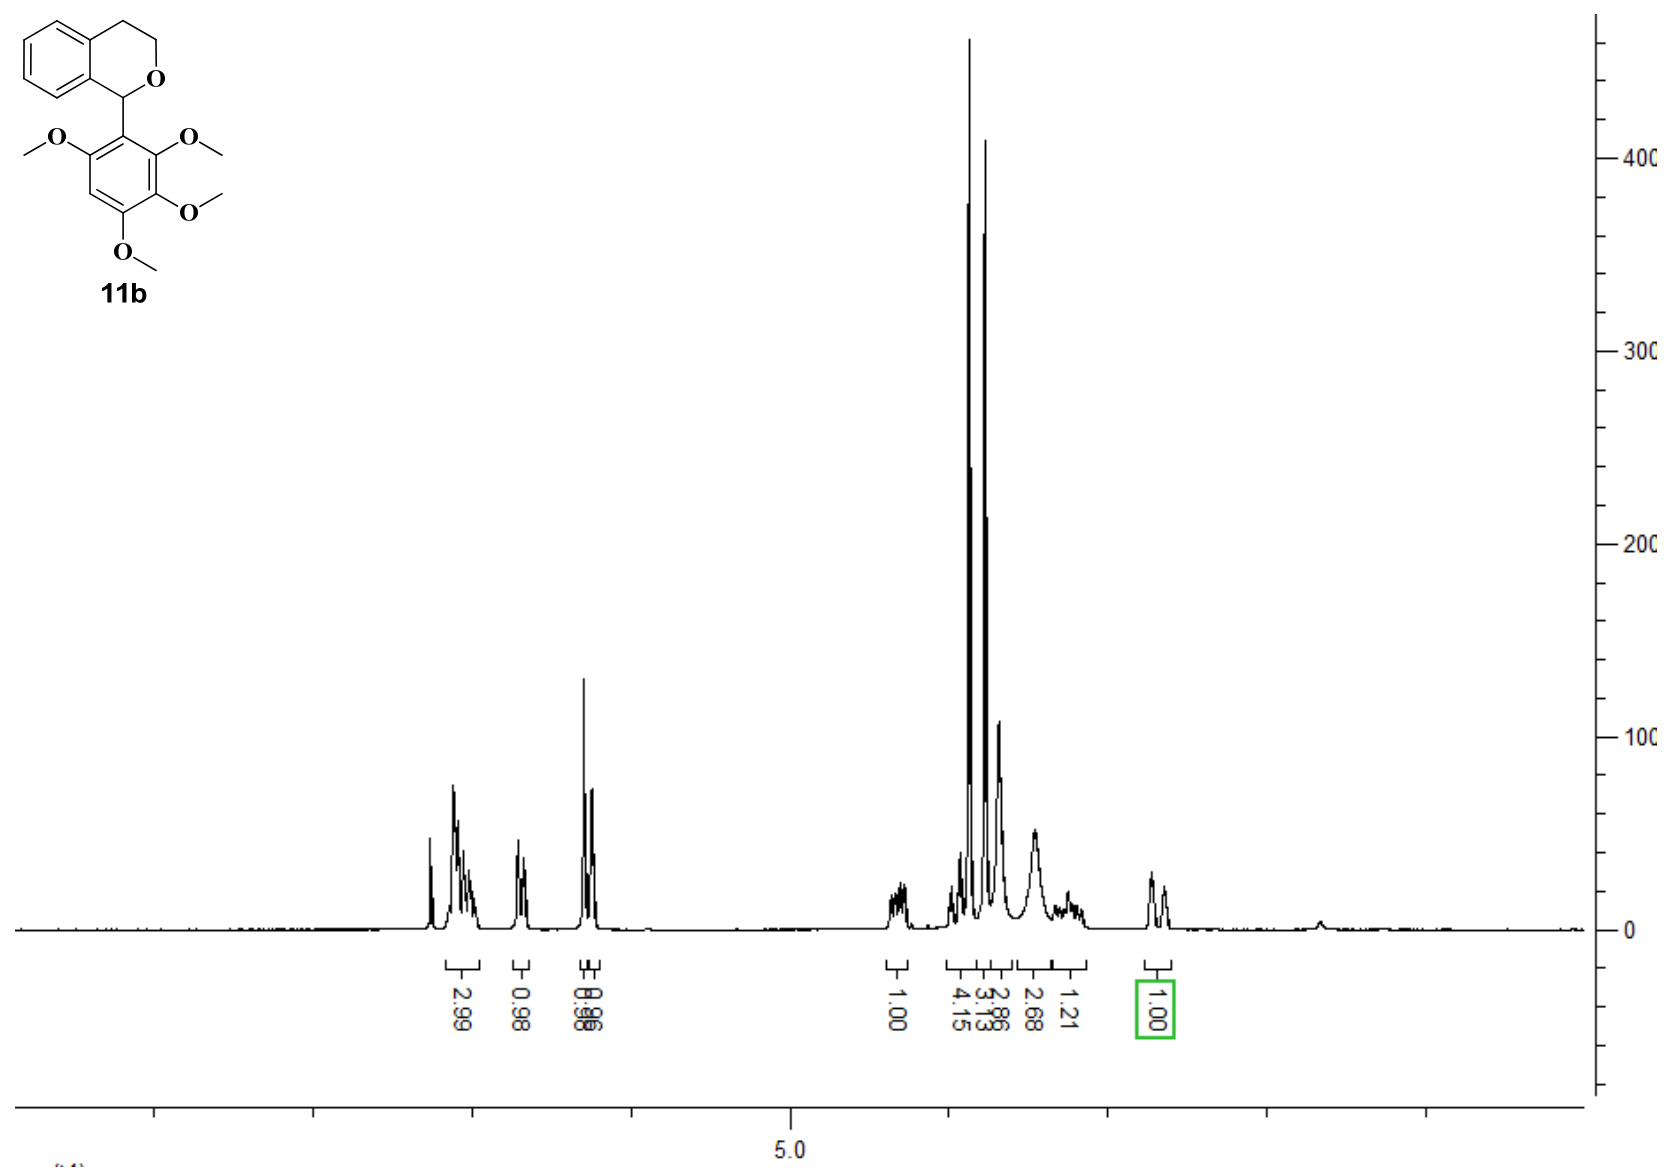

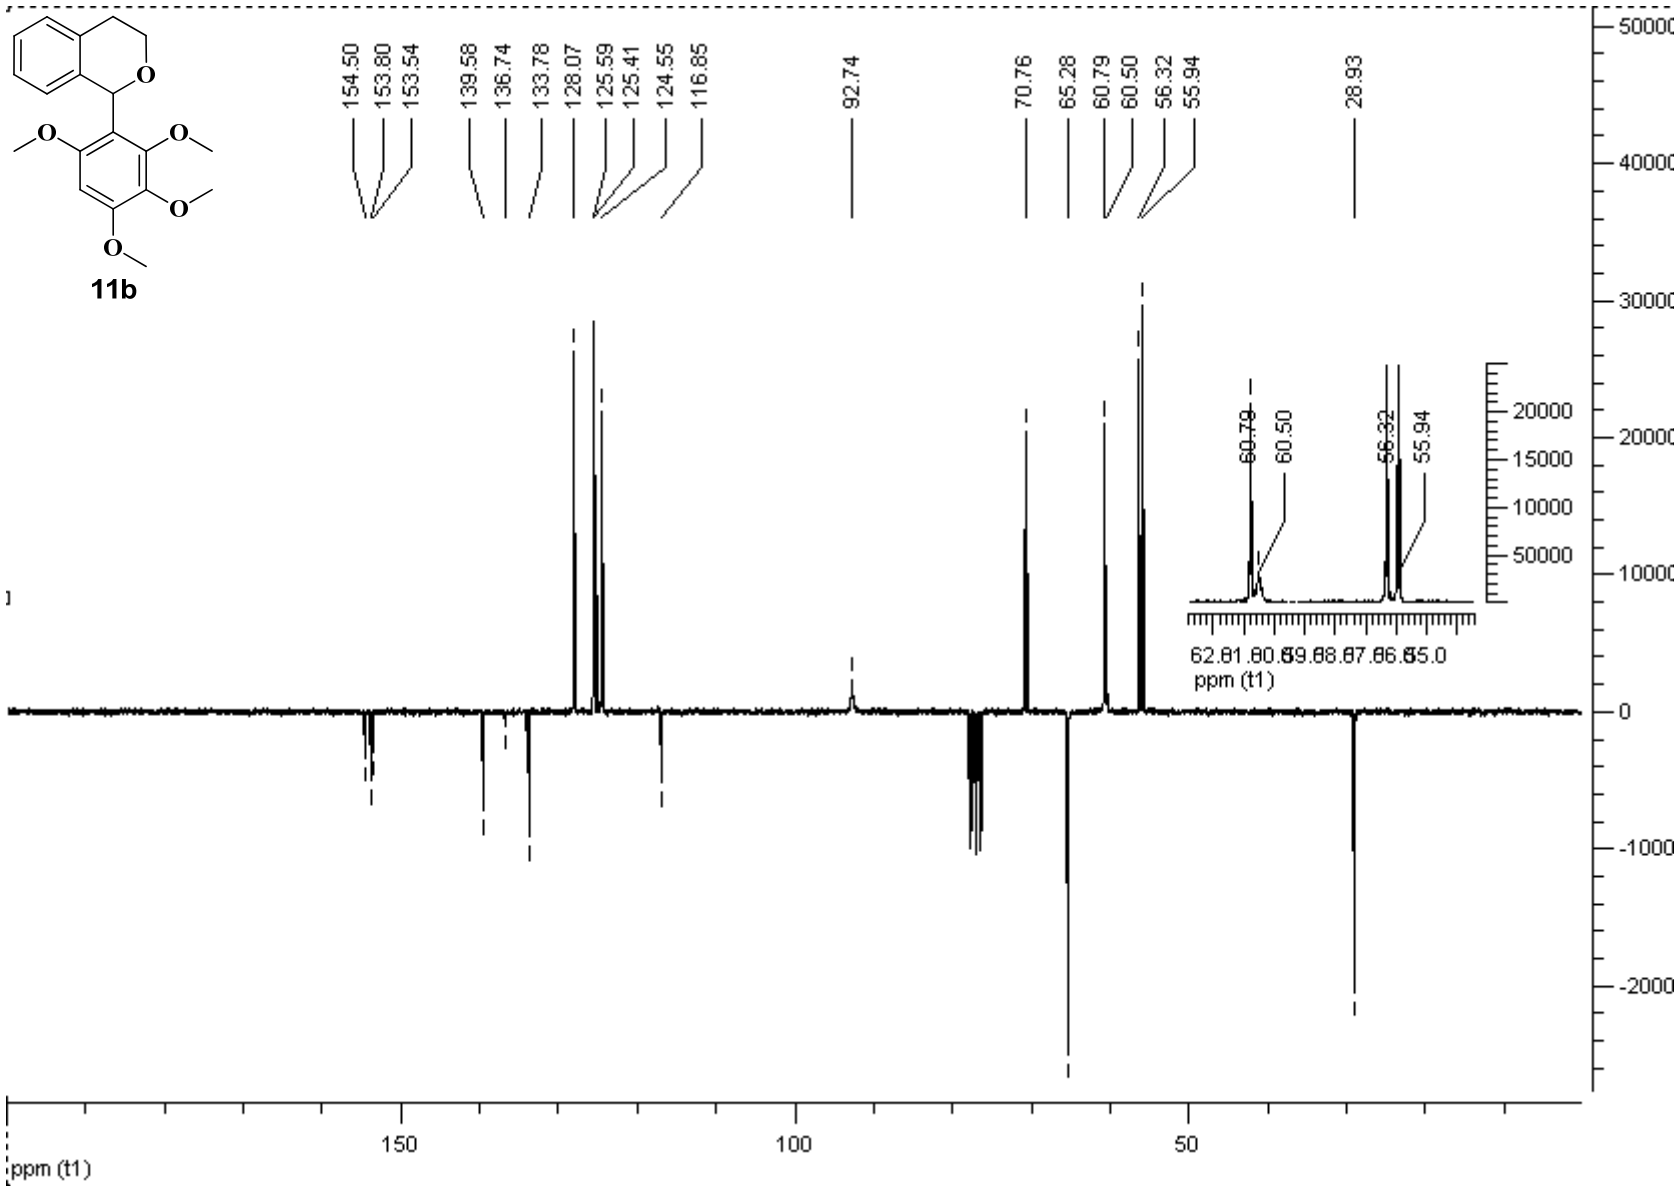

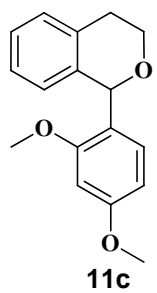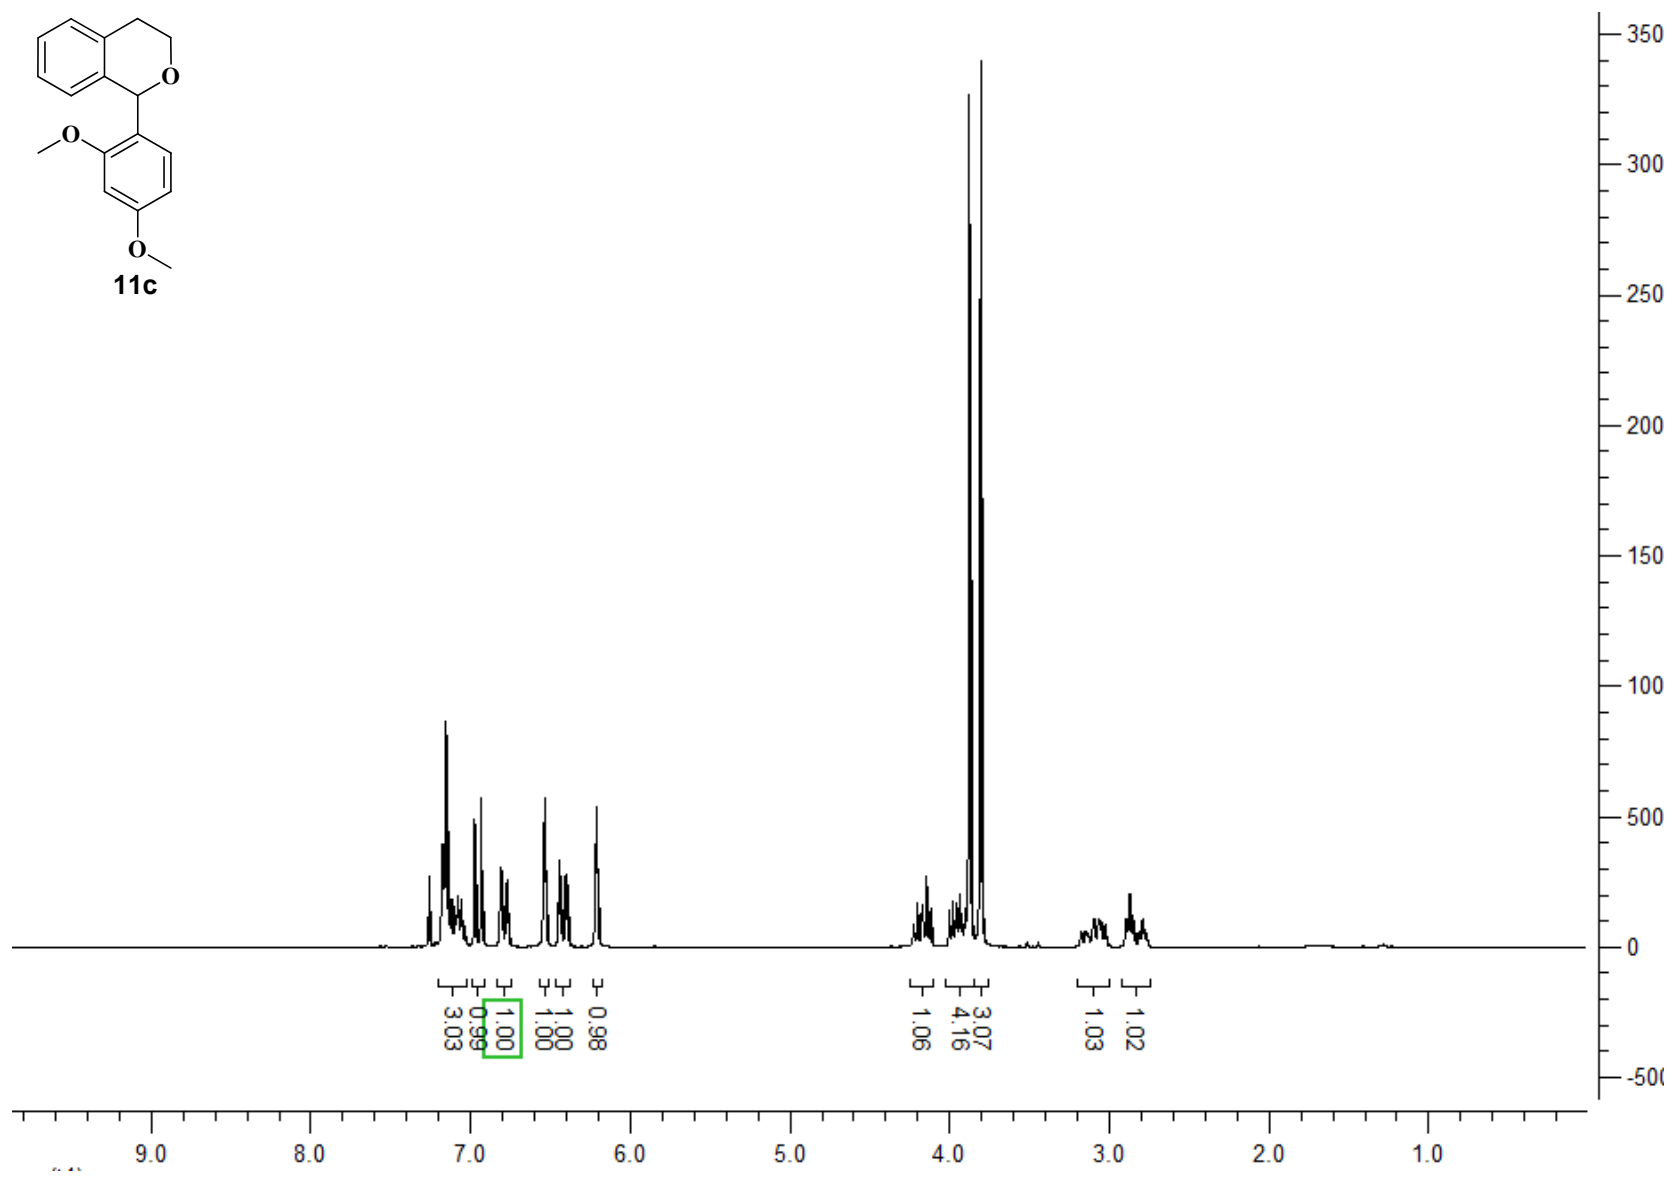

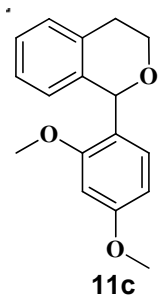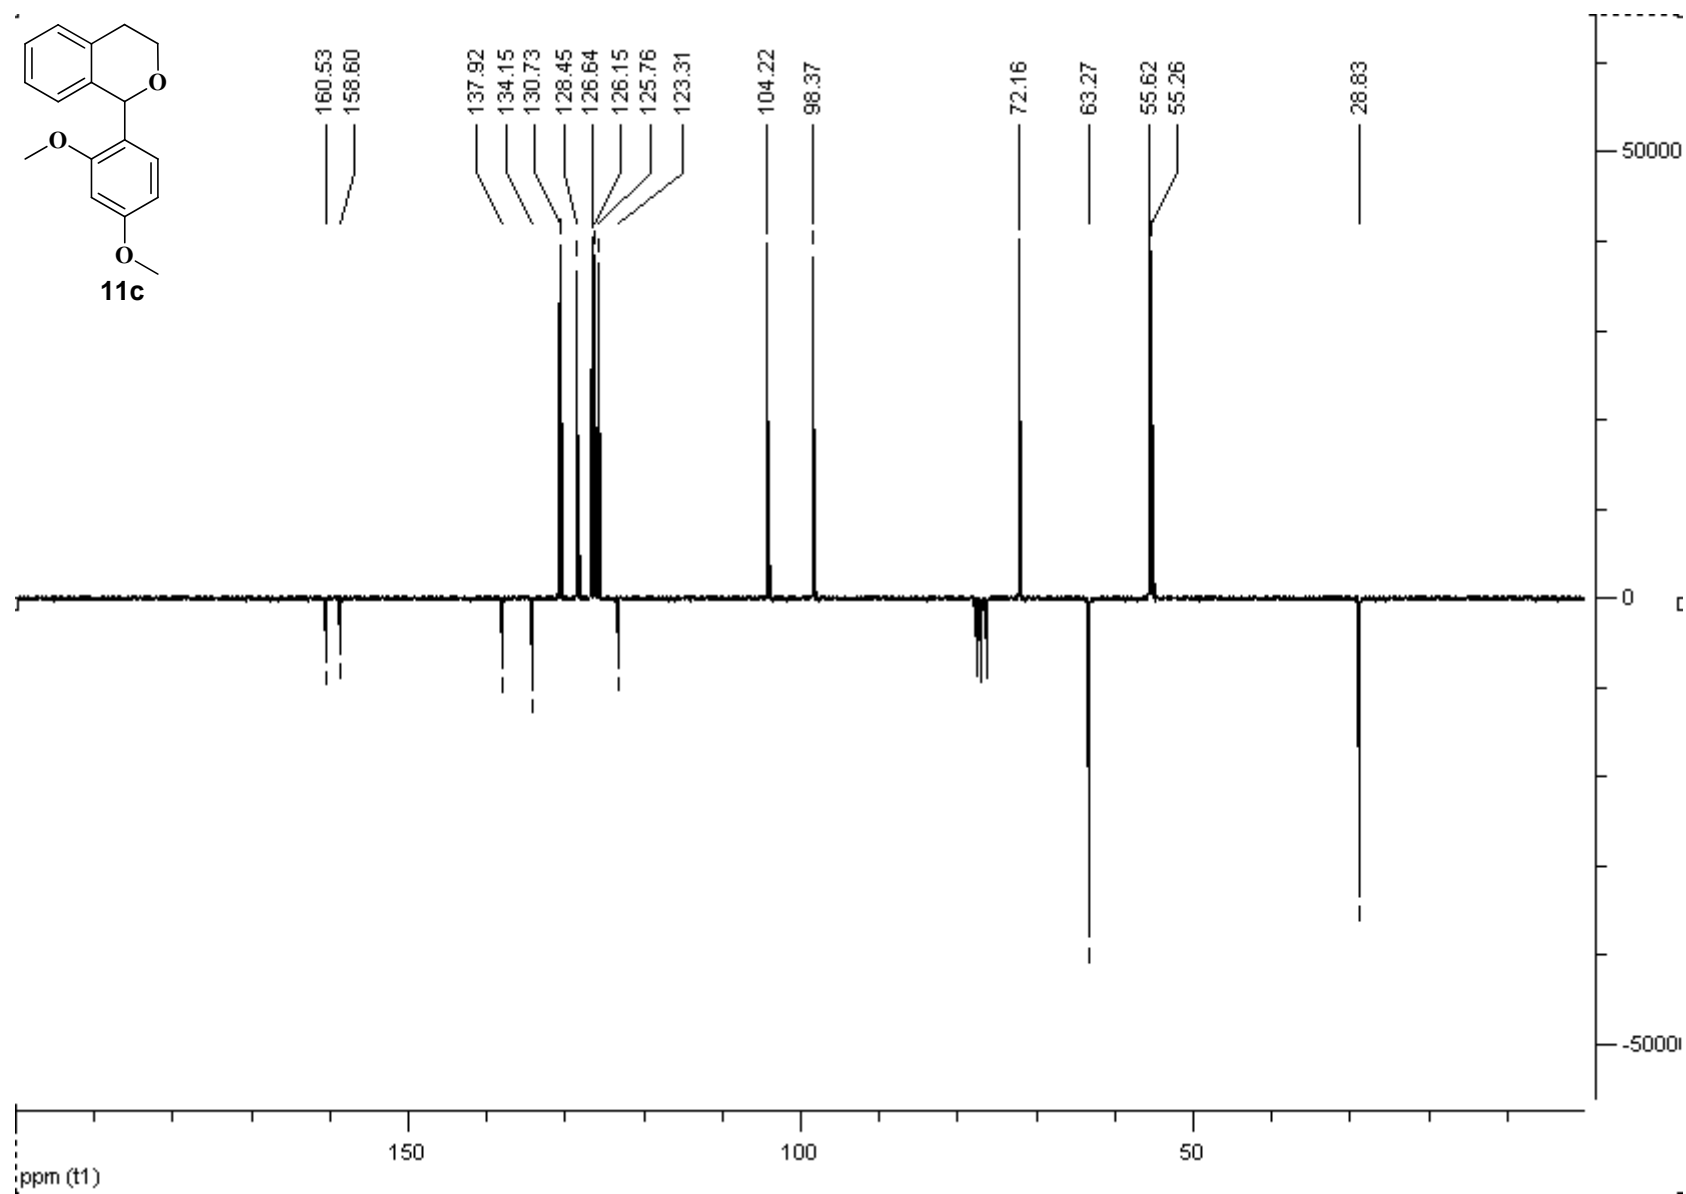

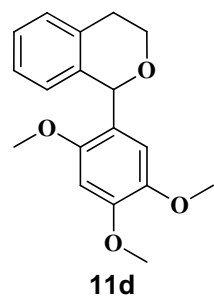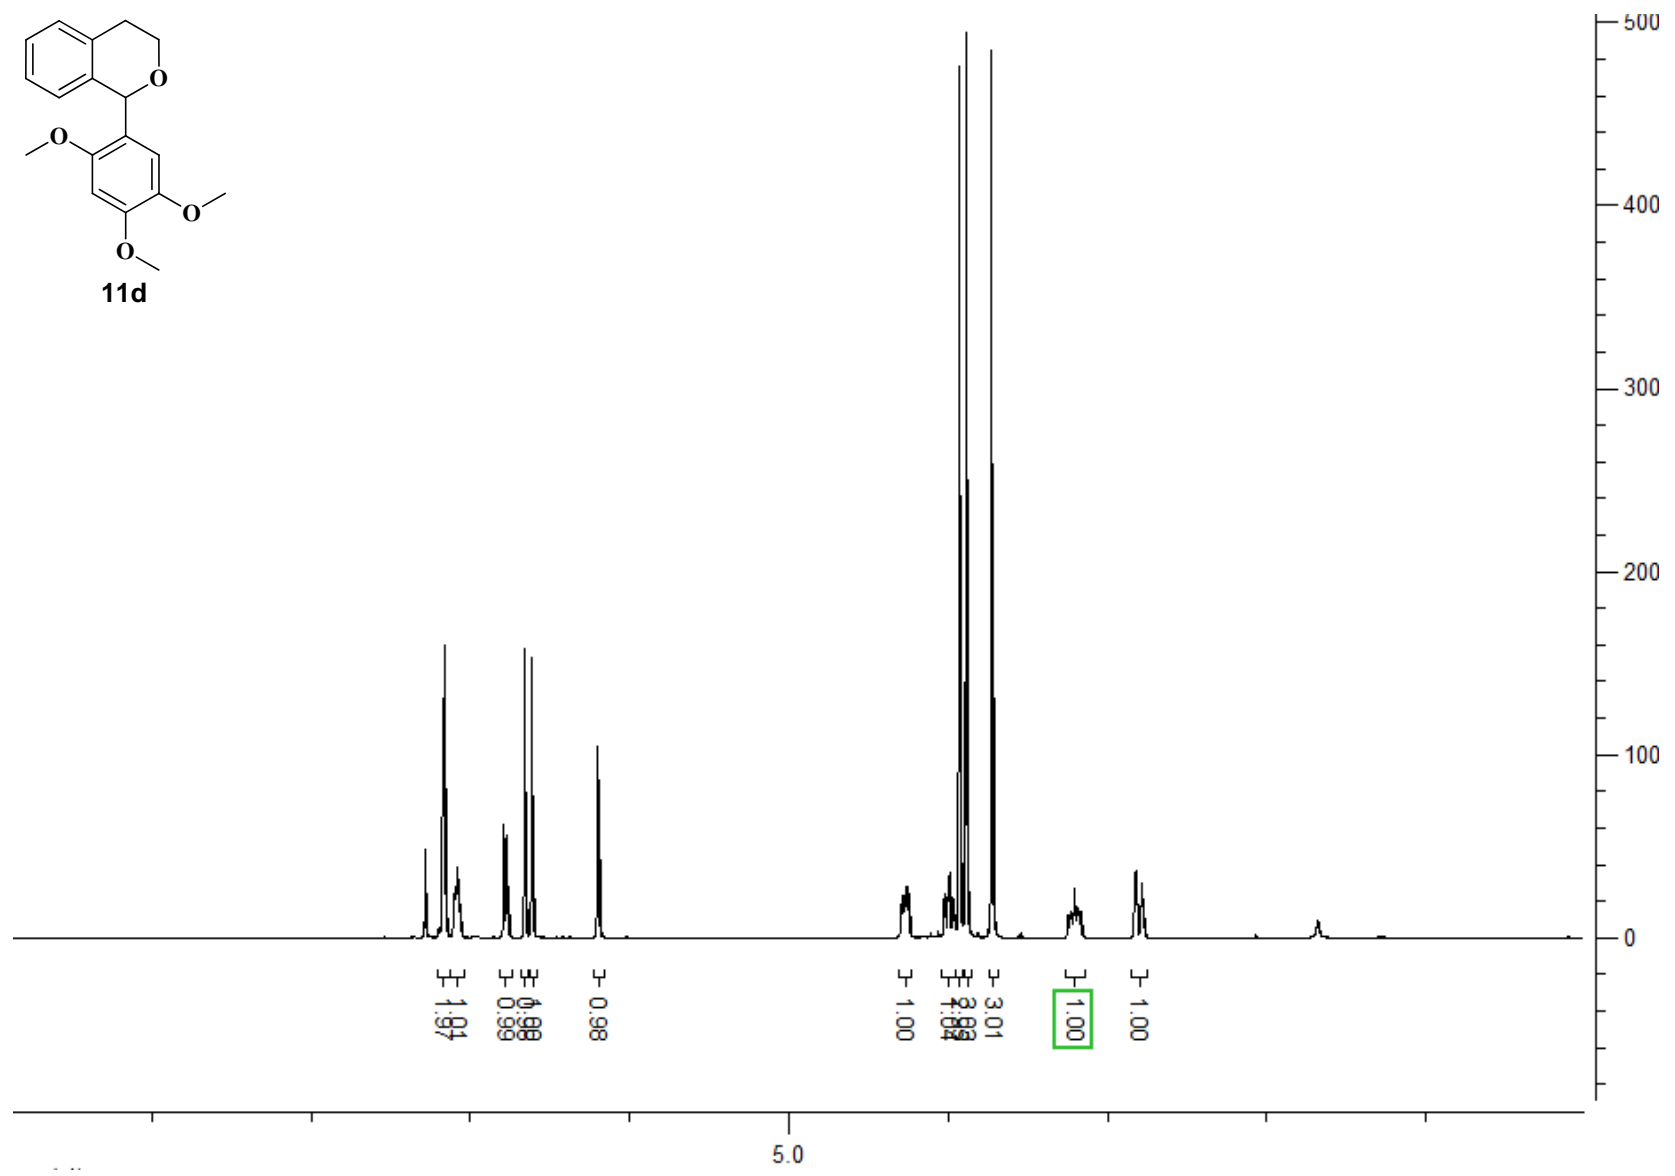

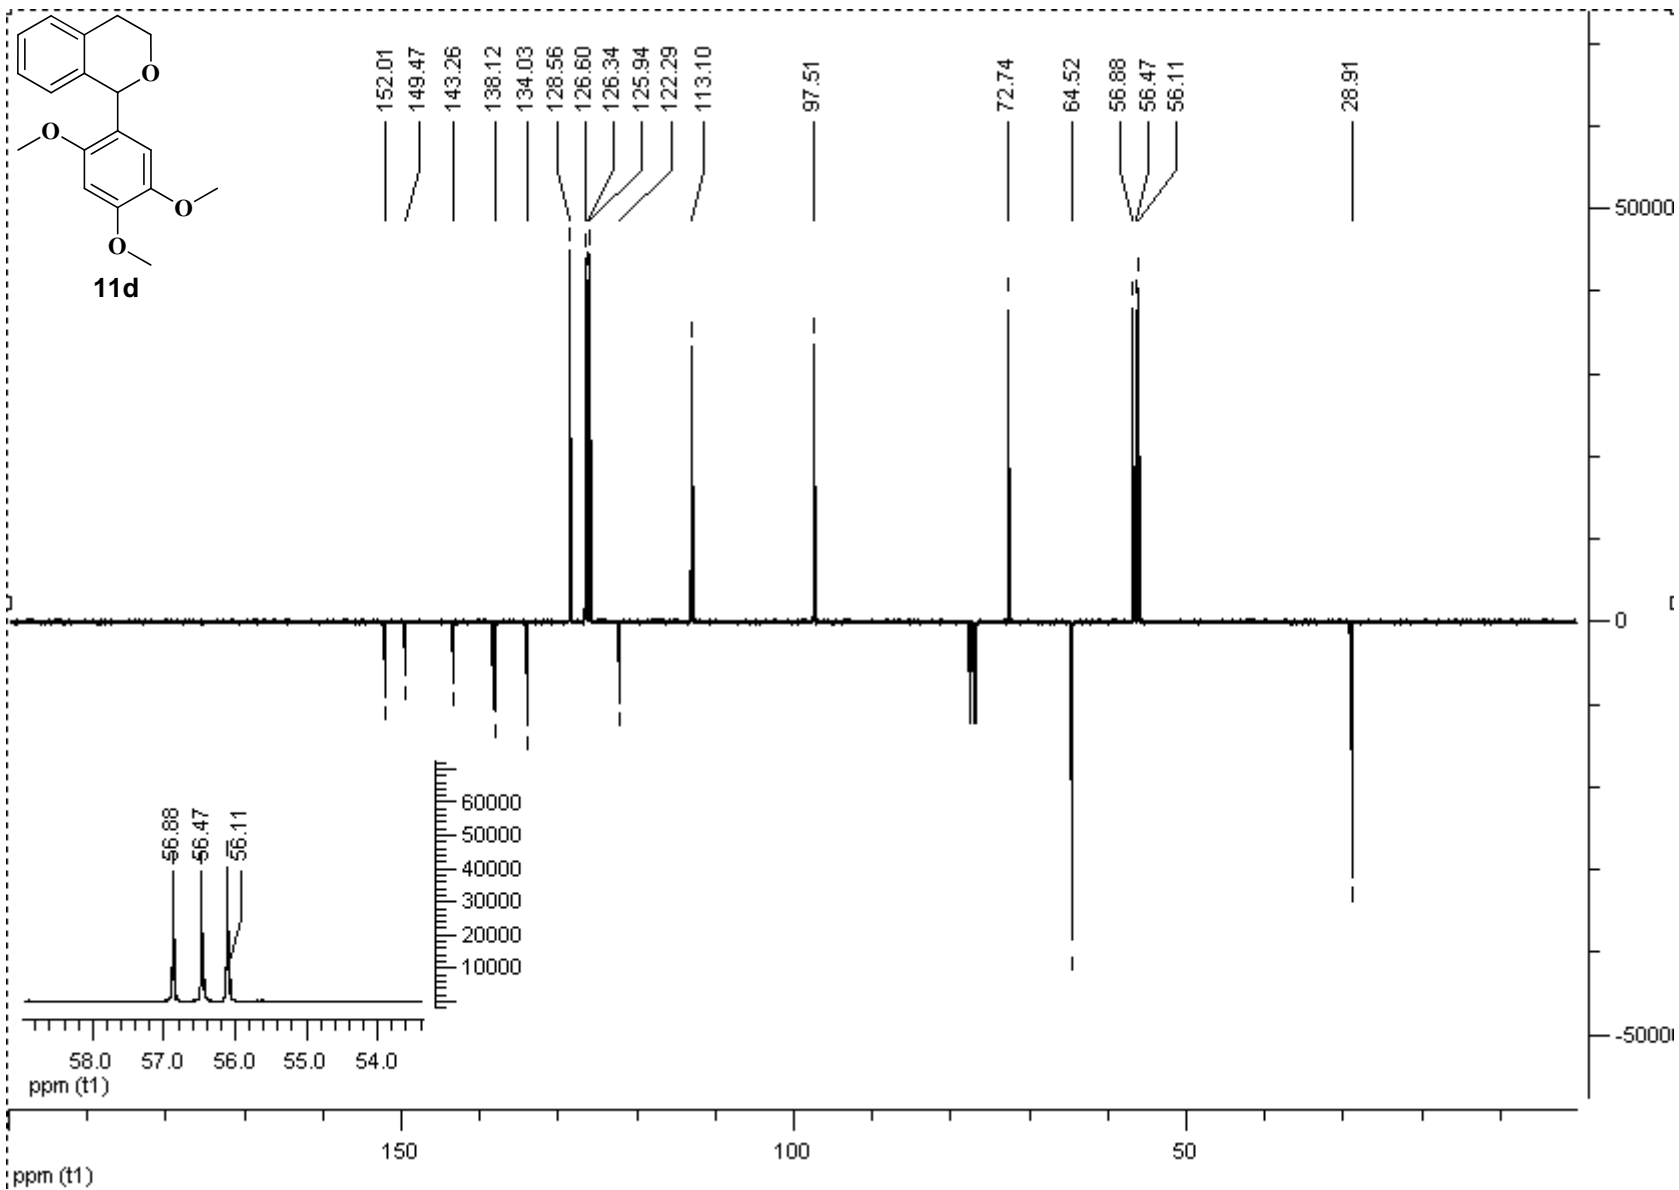

Supplement: jo201511d_si_001.pdf [file jo201511d_si_001.pdf]
